# Supplementary material for: Construction of a Support Vector Machine–Based Classifier for Pulmonary Arterial Hypertension Patients
Source: Front Genet. 2021 Nov 22;12:781011. doi: 10.3389/fgene.2021.781011 (PMC8647811; doi:10.3389/fgene.2021.781011)
Supplement: Supplementary file 3 [file DataSheet1.XLSX]

## Sheet: Sheet1
GSM827665	GSM827666	GSM827667	GSM827668	GSM827669	GSM827670	GSM827671	GSM827672	GSM827673	GSM827674	GSM827675	GSM827676	GSM827677	GSM827678	GSM827679	GSM827680	GSM827681	GSM827682	GSM827683	GSM827684	GSM827685	GSM827686	GSM827687	GSM827688	GSM827689	GSM827690	GSM827691	GSM827692	GSM827693	GSM827694	GSM827695	GSM827696	GSM827697	GSM827698	GSM827699	GSM827700	GSM827701	GSM827702	GSM827703	GSM827704	GSM827705	GSM827706	GSM827707	GSM827708	GSM827709	GSM827710	GSM827711	GSM827712	GSM827713	GSM827714
group	normal	normal	normal	normal	normal	normal	normal	normal	normal	normal	normal	normal	normal	normal	normal	normal	normal	normal	normal	normal	normal	normal	normal	normal	normal	normal	normal	normal	normal	normal	normal	normal	normal	normal	normal	normal	normal	normal	normal	normal	normal	tumor	tumor	tumor	tumor	tumor	tumor	tumor	tumor
RPL41	17.0955	16.8476	17.1737	17.1939	17.1661	17.1304	17.2184	17.0288	17.1057	16.9447	17.3057	17.0955	17.2501	17.1737	16.7626	17.1304	17.2184	16.9447	17.1585	17.2184	16.7091	17.2501	17.1438	17.0955	17.1178	17.0955	17.2501	17.1939	17.2184	16.9535	17.1585	17.1737	16.745	17.1737	17.0379	17.1939	17.0742	17.0617	17.1737	17.2501	17.3057	16.6189	17.0617	17.3057	17.0379	17.1178	17.0502	17.3057	17.1438
EEF1A1	17.1057	16.8773	17.2501	17.1585	17.0069	17.0379	16.8673	16.8863	17.1737	17.0617	17.0742	17.0181	17.0069	17.1585	16.8673	17.0502	17.0069	16.6547	17.1178	17.0069	17.1737	17.0955	17.1178	17.3057	17.1939	17.1737	17.1057	17.2501	17.1585	17.0181	17.0379	17.0955	16.6689	17.0742	16.9359	17.1737	16.963	16.8204	17.0288	17.0379	16.8673	17.1057	17.3057	17.1057	17.0617	17.0288	17.1304	17.1057	17.0617
RPLP2	16.3869	16.5382	17.3057	17.1057	17.2184	16.5124	16.963	16.7324	16.916	16.57	17.1438	16.9359	16.8571	17.0742	16.3265	17.1939	17.0181	16.7531	17.1304	16.9838	16.9053	16.9263	16.7626	17.0742	16.916	16.9727	17.1304	17.1057	17.1057	16.5124	17.1939	17.0502	16.9447	17.0955	17.1304	17.2184	17.1939	16.9359	17.1178	16.9838	16.916	16.5569	16.963	17.0617	17.0742	17.0617	17.1057	17.0838	16.8673
ORC6L	16.7282	17.0288	16.9053	17.0617	16.9359	17.0502	17.1737	17.1178	16.9535	16.9969	16.9447	16.3396	16.9535	17.1438	16.8956	17.1737	17.1057	16.9838	17.2184	16.9359	17.0181	16.7626	16.9447	17.1939	16.6189	16.8863	16.8773	17.1178	17.0955	17.1939	16.8095	17.1585	16.9727	17.0617	17.0617	17.1585	16.5382	16.7282	16.9447	17.2184	17.1304	16.9447	16.7626	16.9727	17.0502	17.0379	16.9969	17.0502	16.8956
RN7SL1	17.0617	17.1737	16.8571	17.0288	17.0379	17.0838	16.8204	17.1438	17.0742	17.1939	16.9969	16.8673	16.772	17.1057	17.2501	17.0069	17.0955	16.9535	16.9969	17.1737	17.0838	16.3733	17.3057	17.2501	16.2559	16.9838	17.0838	16.9053	17.2501	17.0069	16.7282	16.9969	17.2184	17.0181	16.9447	17.0742	16.8863	17.1438	16.8863	17.1939	16.9447	17.1737	17.1178	16.916	16.9359	16.9263	16.8863	17.0069	16.8571
LOC401019	16.9838	17.0617	17.1304	17.1178	17.2501	17.1178	16.9263	17.2501	17.1939	17.3057	17.1939	16.2399	16.5444	16.9447	16.7282	16.702	17.0617	17.0955	17.0742	17.3057	17.0379	16.6473	17.2184	16.916	16.8773	17.0617	17.1939	16.9838	16.9359	16.7808	17.0181	16.8956	16.9053	17.3057	16.4739	16.9053	16.916	16.9263	17.0181	17.0742	17.0502	16.8288	17.0502	16.8773	17.0955	17.1737	17.1585	17.0742	17.0502
FARSLB	16.8571	16.5124	16.963	17.0181	17.0838	16.9838	16.702	16.7626	16.9969	17.0181	17.0288	16.702	16.9727	17.0288	16.4545	16.7091	16.7091	16.6689	16.963	17.0617	16.5516	16.7366	17.0955	17.1178	16.6473	17.0379	16.963	17.0742	17.0502	16.963	16.5156	16.8001	16.59	16.9447	16.8673	17.0502	17.1585	16.9053	16.8204	16.6547	16.9969	16.6404	17.1057	17.0181	17.1178	17.0502	16.9447	17.1304	16.6334
LOC440589	17.1178	17.0838	16.9727	17.1737	17.1057	16.9263	16.79	16.702	16.8773	17.0955	17.0502	16.963	16.9359	17.0181	17.1939	17.0838	16.9969	16.9969	17.1737	16.9535	16.9263	17.1438	16.8001	16.7282	16.9447	17.0838	16.8379	16.9535	16.9263	16.8863	17.2184	17.0379	16.9535	17.1178	16.9969	16.9359	16.6547	16.8773	17.0838	16.6473	17.1057	16.9263	17.1737	17.1939	16.8956	17.0742	16.9838	17.0379	17.1939
CLUAP1	16.3733	16.6615	17.1438	17.1438	17.1304	16.5829	16.8571	17.1737	16.467	16.9359	17.0379	16.6189	17.2184	17.0617	16.2994	16.8288	16.9263	16.6151	17.1438	16.4545	16.6851	16.745	16.5966	17.0838	16.6034	16.4739	16.9838	16.9447	17.1178	16.8288	16.7366	16.8095	16.6939	17.0502	16.5762	17.2501	16.0706	16.4545	17.1438	16.6689	16.677	17.0288	16.6547	16.9447	17.2501	17.1438	17.1939	17.2184	16.6689
LOC388720	17.2184	16.9263	17.0838	16.9535	17.0502	17.1057	17.0379	17.3057	17.1304	16.8956	16.8956	17.2184	17.0617	16.8673	17.0379	16.9969	17.0502	16.9053	17.2501	17.1178	17.1438	16.6404	17.0069	16.8863	17.0288	17.1939	17.1585	17.1304	16.916	17.0838	17.0838	17.1304	17.1304	16.9838	17.1737	17.0181	17.2501	16.963	16.9838	17.0955	17.0069	17.1178	17.1304	17.2501	16.8476	16.9447	16.8673	16.8773	17.1585
LOC285176	17.0742	16.7366	17.0955	17.0069	17.0288	16.6034	17.0955	17.0838	16.9838	16.8773	17.1057	17.1438	16.9969	17.0379	16.5731	17.0617	16.9107	16.9359	17.1057	17.1304	17.0955	16.8095	17.0502	16.9263	17.1057	17.1178	17.0379	17.1585	17.0838	16.8476	17.0742	17.1438	17.0502	17.1585	16.963	17.0288	16.9263	17.0379	17.0379	17.1057	16.7366	16.9359	17.2501	17.0838	16.916	16.9359	17.0069	17.0617	17.1304
RPS27A	17.1585	17.1304	16.9969	16.916	16.9727	16.9969	17.0288	17.2184	17.3057	17.2501	16.9053	17.3057	16.8863	16.8095	17.0955	17.1178	17.1939	17.1585	17.0181	16.467	17.1304	17.3057	17.2501	16.7366	17.1585	17.0742	16.9359	16.9727	16.8095	17.2184	17.1438	17.3057	17.1939	16.9359	17.0838	16.9447	17.3057	17.2501	16.9535	17.0617	17.1585	16.6113	17.1438	17.0955	16.8773	16.8956	16.916	16.916	17.2501
RPS16	16.4078	16.7188	17.0379	17.2184	16.9838	16.677	16.9969	16.6404	16.9727	16.7366	17.0838	16.5382	16.7808	17.0069	17.0069	16.5966	16.8571	16.8204	17.0617	16.8956	16.916	16.4605	16.9727	17.0502	17.1737	16.7808	16.8863	16.9263	17.1737	16.8001	16.8956	16.8673	16.5634	17.1304	17.2184	17.1438	17.0181	16.5762	17.1939	16.9053	17.0288	16.8001	16.9535	17.0288	17.0288	17.0955	17.0838	16.9969	17.0838
LOC647361	17.1304	17.1585	17.1939	17.0742	16.963	17.0742	17.0838	17.1304	17.2184	17.1438	16.9838	16.9969	17.1438	17.2184	17.0617	17.2501	17.2501	17.1939	17.3057	17.1057	17.3057	16.6689	17.1737	17.0288	17.0181	17.1585	17.1178	17.1737	16.9969	16.9838	17.0502	17.2501	17.1737	17.1939	16.7808	17.3057	17.0955	17.1737	17.1304	17.0069	17.1178	16.9838	17.0742	17.0502	16.6334	16.9535	16.8095	17.0288	17.3057
RPLP1	17.0502	17.0502	16.9447	16.963	16.9969	17.0955	16.916	16.9053	16.9447	16.8673	16.963	16.4545	16.677	16.916	16.9838	17.1585	16.9838	17.2184	16.9535	17.0379	17.0288	16.7282	17.1939	16.9838	16.8956	16.8956	17.3057	17.1438	16.8863	16.8095	17.1304	17.1178	16.8288	17.0379	16.2331	17.0838	17.0502	16.4808	16.9969	16.7531	17.0955	16.7282	16.9359	17.1438	16.963	16.963	17.0181	16.9447	17.0379
RPS27	16.7091	16.487	17.1585	17.0379	17.0742	16.6851	16.7091	16.7531	16.7188	16.5829	17.0617	17.0069	16.9263	17.0502	16.9447	16.6615	16.3671	16.6258	16.8863	16.6615	16.702	16.8956	16.8863	17.0617	16.6404	16.57	16.916	16.8476	17.0069	16.7091	16.79	16.7366	16.5063	17.0288	16.9053	17.1304	16.6851	16.8288	17.0742	16.8001	16.5063	16.9053	16.9838	16.9263	17.1304	17.0838	17.1737	17.1737	16.8204
RPS29	16.702	16.8673	17.2184	17.0955	17.1178	16.6939	16.7531	17.0069	16.745	16.6615	17.1178	16.8288	16.963	17.1939	16.3671	17.0379	16.8773	17.1178	17.0502	16.963	16.5966	16.8571	16.7366	17.1585	16.7282	16.6334	16.9263	16.8956	17.0617	16.677	16.7808	16.9535	16.9263	17.2184	16.5256	16.9838	16.6689	16.916	17.1585	17.1178	16.6334	17.0502	16.6851	17.0379	16.8379	17.1057	16.963	17.0955	16.963
ITIH5	16.57	16.8571	16.9263	16.8673	16.9447	16.5966	16.59	16.772	16.4996	17.0838	17.0181	16.4936	16.9447	17.1178	16.4474	16.8379	16.6404	16.916	16.7091	16.487	16.9447	15.9026	16.9359	17.1057	16.9053	16.8673	16.9447	16.963	17.0742	16.5966	16.8204	17.0742	16.3733	16.9263	16.3733	16.8048	16.7282	17.1304	16.963	17.1438	16.8476	16.2269	16.5256	16.9969	17.1057	16.9838	17.0288	16.9838	17.0181
NAG18	16.8288	16.9447	16.8001	16.8001	16.8476	16.7091	16.9447	17.1585	17.0181	17.0288	16.8095	16.6689	16.6404	16.8571	16.79	16.9263	17.0288	17.1057	17.0379	16.8571	17.1939	16.9535	17.0617	17.1737	17.0838	16.59	16.8288	16.8773	16.8956	16.772	16.59	17.1939	16.772	16.8095	16.8476	17.1178	16.7366	16.7626	16.8095	16.9969	16.963	17.0742	16.9053	16.7188	17.0069	16.8773	16.8571	16.9727	16.9447
C19orf31	16.3332	16.59	17.1057	17.3057	17.3057	16.6369	16.5634	16.8095	16.5382	16.745	17.1585	16.5634	17.1178	17.0955	16.3869	16.79	16.9447	16.7188	16.8956	17.0288	16.8476	16.1685	16.8288	16.9969	16.3606	16.6689	17.0181	16.6547	17.1939	16.8773	16.9727	16.9263	16.8001	17.0838	16.6113	16.6404	16.5966	16.5966	16.9263	16.702	16.9727	16.4739	16.6939	16.8863	17.1438	17.0069	17.1178	17.2501	16.4416
LOC642210	17.2501	17.3057	17.0069	16.9447	16.9263	17.2501	17.056	17.1939	17.2501	16.9838	17.0955	17.1939	17.1939	16.9359	16.9053	16.7808	17.3057	17.1737	17.1939	17.1585	17.2184	17.1585	17.0742	16.7808	17.3057	17.2184	17.0955	17.2184	16.8673	17.3057	17.1737	16.8476	16.7091	16.9535	17.1585	16.9263	17.1737	17.1939	17.0617	16.9447	17.1939	16.8773	17.2184	16.9535	16.677	16.8379	16.7091	16.9535	16.6615
TMSB4X	16.7366	16.3802	17.0288	17.1304	17.0955	16.487	16.467	16.2776	16.7366	16.59	17.1304	16.8204	16.7282	17.0838	16.702	16.5256	16.3332	16.4288	16.7808	16.6851	16.8379	16.9447	16.79	17.0069	16.745	16.7282	16.745	16.8673	17.1438	16.9969	16.916	16.8288	16.2923	17.1438	16.9535	16.7188	16.8095	16.3332	17.2501	16.5966	16.8773	17.0181	16.7366	16.9053	17.3057	17.1304	17.0617	17.1939	16.6189
ROCK2	16.2051	17.0379	16.7808	16.8773	16.8773	16.451	17.1304	16.79	16.7531	17.0742	16.772	16.6615	16.5516	16.8863	16.9727	16.8001	16.963	17.0838	17.0838	16.79	16.9359	16.5966	16.9838	17.1438	16.263	16.677	17.0288	17.0617	16.8204	16.7282	16.6334	16.9359	16.8673	16.963	16.7626	17.0379	16.4936	17.0838	16.8001	16.9535	16.8956	16.4605	16.5187	16.8673	16.9969	16.8673	16.9053	16.9263	16.6438
LOC91561	17.0288	16.9969	17.0181	17.0502	17.0617	16.6258	16.8001	16.9535	17.0288	17.1304	16.916	16.7531	17.1737	16.9053	17.1737	17.3057	16.8379	16.8863	16.8476	17.1438	16.963	17.1304	17.0838	16.8571	17.2184	16.8571	16.7626	17.0955	16.745	16.8673	17.1178	16.7139	16.8204	17.1057	17.1438	16.8204	16.9727	16.9447	17.1057	16.772	17.1438	17.1585	17.0069	17.1304	16.9053	16.9969	16.9359	17.0181	16.79
KIAA0101	16.79	17.1178	16.7626	16.8379	16.8956	16.5382	16.9535	16.8773	17.1178	17.0069	16.8476	17.0742	16.8204	16.8204	17.1178	17.0288	17.0838	17.1304	16.9359	16.7188	17.1057	16.8379	17.1304	17.1304	17.0617	17.0181	17.0742	16.916	16.9838	16.79	16.745	17.0838	16.9359	16.8001	16.7282	16.8956	16.9447	16.5829	16.7188	17.1585	16.9053	16.677	17.0181	16.677	16.5319	16.8571	16.7626	16.8379	16.3733
OAZ1	16.7626	16.9053	16.4347	16.5569	16.6404	16.5516	16.6939	16.6473	16.4416	16.3802	16.6939	17.0379	16.5762	16.2839	17.1057	16.9535	16.5516	17.0234	16.6113	16.6438	16.6615	16.4153	16.8095	15.8943	16.1829	16.4474	16.263	16.2776	16.3332	16.8379	16.772	16.9447	16.8379	16.7188	17.2501	16.79	16.8773	16.9969	16.5124	17.1737	16.4808	17.3057	16.8001	17.1178	17.0181	16.6689	16.9535	16.7531	17.1178
RPS25	17.3057	17.1939	16.8863	16.9263	16.8863	17.2184	17.0742	16.9969	17.0617	17.1057	16.8673	17.1057	17.1585	16.8288	17.3057	17.2184	17.1438	17.2501	17.0955	17.0838	17.2501	17.1737	17.1057	16.702	17.1438	17.1057	17.0069	17.0838	16.79	17.2501	17.3057	17.0069	17.1057	16.8673	17.0069	16.9969	17.1178	17.3057	16.8956	16.8095	17.2501	17.1939	17.0288	17.0742	16.6113	16.7808	16.7531	16.7808	17.1737
F2R	16.467	16.2776	17.0617	16.9727	17.1438	16.6113	16.5444	16.7188	16.2923	16.6851	16.9359	16.9053	16.8773	17.1304	16.4739	16.3396	16.5063	16.5319	17.0069	16.4936	16.7808	16.2701	16.59	16.9359	16.4545	16.6939	16.9535	16.7366	16.9727	16.745	16.8476	17.0288	16.4153	17.2501	16.3941	16.8288	16.4347	16.4739	16.916	16.7282	17.0379	16.4903	16.4996	17.0069	17.1585	17.3057	17.2184	17.1438	16.772
IMAA	16.6113	16.3869	17.1178	17.2501	17.1661	16.4996	16.1138	16.5256	16.3671	16.5762	17.0069	16.1829	16.916	17.2501	16.4996	16.4808	16.57	16.4153	16.79	16.3131	16.8288	16.487	16.772	17.0181	16.5966	16.8204	16.9053	16.6689	17.0379	16.57	16.9447	16.4078	16.5382	16.9727	16.1829	16.9727	16.8956	16.5634	17.0069	16.5187	16.7808	16.745	16.6034	16.9838	17.1939	17.2184	17.3057	17.1178	16.5829
TPT1	16.9969	16.8379	16.702	16.8204	16.745	16.8863	16.8863	17.0617	17.1438	16.9263	16.57	17.0617	17.3057	16.8476	17.0742	16.9359	16.8956	16.9263	16.9727	16.9969	17.0502	17.0617	16.8571	16.79	17.0441	16.702	17.0502	16.8204	17.0288	17.1737	16.9969	16.8571	16.3195	16.745	17.0955	17.0617	16.8001	16.6334	16.8476	17.0838	17.2184	17.0617	16.7188	17.2184	16.8001	16.7091	16.8288	16.772	16.8476
LAIR1	16.4474	16.4739	17.0742	16.9969	17.1939	16.1448	16.7366	16.9359	16.4008	16.8379	17.1737	16.5319	17.0379	16.8956	16.3131	16.57	16.702	16.7366	16.8288	16.6438	16.6189	16.1237	17.0379	16.7531	16.4638	16.1829	16.8476	16.8571	17.1304	16.3057	16.5156	16.5063	16.3671	17.0069	16.487	16.7531	16.2051	16.79	17.0955	16.8956	16.8571	16.3131	16.6334	16.8956	17.0838	17.2501	17.2501	17.1585	16.9359
MSH3	17.1438	16.9838	16.7366	16.745	16.8379	16.916	16.5124	17.0955	16.9053	16.8476	16.7282	16.6851	16.7091	16.8001	17.0838	17.1438	17.1585	17.0502	16.8673	16.9447	17.1178	16.9727	16.9969	17.2184	16.9263	16.7091	17.0617	16.8863	16.9447	16.7531	16.5516	17.0181	17.2501	16.7282	16.8773	16.8048	16.6404	16.8001	16.57	16.8379	16.6404	16.79	16.5319	16.6473	16.6404	16.5762	16.6547	16.8476	16.5124
RPL3	17.0838	16.8956	16.8204	16.79	16.8288	17.0288	17.1057	16.6689	17.1585	16.8571	16.8773	16.7854	17.0181	16.772	17.0502	17.0181	16.7366	16.6939	16.8379	17.0502	16.8001	16.916	16.7808	16.8001	16.9727	16.8773	16.7188	16.772	16.7531	16.9447	17.0069	16.9838	16.6334	16.8204	17.1117	16.8863	17.0069	16.6473	16.79	16.916	16.9263	16.8673	17.0955	16.7808	16.9447	16.9053	16.9263	16.8288	17.0288
CCR6	16.5124	16.963	16.6851	16.8095	16.8204	16.5762	16.9727	16.9212	16.9359	16.6189	16.7531	16.7188	17.0502	16.9969	16.4078	16.8204	16.8001	16.8773	16.8204	16.7282	16.9969	16.8204	17.0181	17.0379	16.6851	16.6851	17.1737	17.0069	16.8773	16.5444	16.5063	16.963	17.1178	16.79	16.6334	16.8379	16.9535	16.8379	16.6473	16.9359	16.8095	16.9535	16.9263	16.7282	16.9727	16.6334	16.772	16.8673	16.4996
LOC644039	16.9359	16.6851	17.0502	17.0838	16.916	16.9535	17.1438	17.0742	16.79	16.9727	16.9727	16.6473	16.8288	16.963	16.6851	16.8773	16.772	17.0617	16.916	16.8863	16.9727	16.4739	16.8673	16.8773	17.1304	16.9263	16.7282	16.9359	16.963	17.1304	17.0288	16.8379	16.3606	16.9053	16.9838	16.8571	17.0379	16.7188	17.0502	16.745	16.8001	17.1438	16.916	16.79	16.8204	16.9727	16.8773	16.9359	16.9053
UBC	17.0379	17.2184	16.5829	16.8956	16.7366	17.0617	17.3057	16.9727	17.0955	17.1585	16.9263	17.2501	17.0742	16.9727	16.8288	17.1057	17.0379	17.0234	16.9838	17.2501	17.0742	16.7091	16.8773	16.8204	16.9838	16.9969	17.2184	16.79	16.8379	16.9359	17.0617	16.6851	17.0838	16.8773	16.8095	17.0955	17.1057	17.1178	16.6939	17.1304	17.1737	17.0838	16.6223	16.8288	16.8288	16.8863	16.702	16.6404	17.0955
S100A8	16.5966	16.9359	16.3941	16.5444	16.5319	16.79	17.1585	16.4808	16.5319	16.2269	16.467	16.8773	16.4638	16.1898	16.59	16.6939	16.9107	16.8673	16.4008	16.3606	16.6258	16.6034	16.9053	15.4912	16.3195	16.2701	16.5444	15.9906	16.7366	16.9263	16.677	17.0617	17.3057	16.4808	16.7188	17.0069	17.0617	17.0069	16.5382	17.3057	16.5966	16.963	16.7531	16.7531	16.702	16.6258	17.0742	16.5829	17.2184
LOC387841	16.7808	16.6404	16.9838	16.9838	17.0181	16.4808	16.8476	16.9838	16.8095	16.963	16.9535	16.8863	16.9838	16.9263	16.422	16.6689	16.5382	16.2051	16.8095	16.6189	16.5187	16.5516	16.963	16.9727	16.3671	16.9053	16.6851	17.0288	16.8476	16.9053	16.8379	17.2184	16.5319	16.9969	16.745	16.8476	16.5187	16.4474	16.9727	16.963	17.0617	17.2501	16.8379	16.8095	16.9535	17.0181	17.0379	16.963	16.9535
LOC400721	16.4605	16.6258	16.8288	16.7366	16.7188	16.5187	16.5569	16.6189	16.8863	16.8288	16.7626	16.5829	16.7188	16.79	16.5634	16.8571	16.745	16.7626	16.6615	16.6034	16.8673	16.422	16.9263	16.8956	16.8673	16.8288	16.8204	16.6113	16.9535	16.5187	16.7091	16.7626	16.6034	16.8288	16.59	16.8673	16.7626	16.57	16.6851	16.7188	16.772	16.6581	16.8863	16.8571	16.9838	16.6939	16.8001	16.8571	16.4545
HBB	16.5319	17.0955	16.677	16.2051	16.1448	17.1438	16.677	16.08	17.0838	16.2135	17.2184	17.1585	16.8379	17.3057	16.7531	16.7366	16.9359	16.5569	15.9991	16.8095	15.5136	16.2994	16.2051	15.3153	16.8288	16.487	16.9969	17.3057	17.3057	17.0955	16.8001	16.8863	15.7739	16.2839	16.8288	16.963	16.2839	16.9727	17.2184	16.7091	15.4441	16.9727	16.8673	17.1585	17.2184	17.1585	17.1438	15.8463	16.916
LOC643284	16.963	17.2501	16.8673	16.8571	16.79	17.3057	17.1939	16.9212	16.5187	17.1737	16.8571	17.1178	16.8001	16.8773	17.1304	16.7188	17.1178	17.3057	16.9447	17.1939	17.1585	17.1178	17.1585	16.8095	17.2501	16.9359	16.8571	16.9969	16.7808	17.1585	16.9535	17.1057	17.0181	16.8863	16.8001	16.9535	16.8476	17.0955	16.9053	17.0181	17.0742	16.772	17.0379	16.745	16.4996	16.7626	16.6615	16.8956	16.9727
RPS12	17.1737	17.1438	16.8773	16.7531	16.8571	17.0181	16.9838	17.0502	17.0069	17.2184	16.8001	16.6939	16.9053	16.8379	17.0181	17.0955	16.6113	16.5187	17.0288	16.5762	16.8095	17.0838	17.0288	16.7626	16.8571	17.0069	16.8956	17.0181	16.772	16.916	16.7531	16.7764	17.1438	16.8476	16.6404	16.6615	16.5634	17.1585	16.9359	16.6939	16.4936	16.4008	17.0838	16.6689	16.8095	16.79	16.7188	16.8095	16.9969
RPL32	16.9053	16.7808	16.9359	16.9053	16.8673	17.1737	16.9359	17.0181	17.0379	17.0379	16.8204	16.9838	17.1057	16.7366	16.745	16.9053	16.8673	16.677	16.9053	16.9263	16.677	17.0502	16.8956	16.677	16.7808	17.1304	16.8095	17.0379	16.8571	17.0502	16.9838	16.7531	16.5256	16.7626	17.1939	16.916	17.0838	16.8571	16.8673	16.7808	16.9838	17.2184	16.8956	16.7626	16.7808	16.8288	16.745	16.8863	16.7808
LOC646195	17.0181	17.1057	16.9535	16.7626	16.9053	16.8476	17.1178	16.8476	16.9263	16.9053	16.8863	17.1304	17.0838	16.7808	17.1438	16.8956	17.1304	16.8379	16.8773	17.0955	16.8571	16.9359	16.916	16.8379	17.0955	17.2501	16.5966	17.0502	16.7626	17.1438	17.2501	16.916	17.0955	16.7808	17.3057	16.7091	17.2184	17.0502	16.8571	16.677	16.9359	17.1304	16.9969	16.963	16.6939	16.916	16.8476	16.8204	16.9838
MGC16703	16.5829	16.6689	16.6689	16.6851	16.772	16.9727	16.6189	16.6939	16.8571	16.6258	16.7091	16.6547	16.7626	16.7626	16.3396	17.0742	16.9535	17.0742	16.8001	16.772	16.8956	16.4474	16.7282	16.963	16.5569	16.916	16.7808	16.8379	16.8001	16.6404	16.6258	16.79	16.8571	16.772	17.0502	16.772	16.7531	16.6189	16.5966	17.0502	16.7188	16.5124	16.8773	16.6615	16.5762	16.6851	16.5444	16.79	16.3941
LILRB3	16.2776	16.4288	16.8956	16.8863	16.8001	16.2135	16.3538	16.5382	16.4605	16.5382	16.8288	16.3538	16.5966	16.9535	16.1237	16.5187	16.79	16.2923	16.6939	16.5569	16.3606	16.4808	16.5634	16.9447	16.3396	16.4545	16.7531	16.7188	16.9053	16.4936	16.487	16.6615	16.3869	16.8571	16.4078	16.7626	16.702	16.3469	16.7808	16.5063	16.6689	16.6334	16.4545	16.6939	16.9263	16.8476	16.8956	16.9053	16.4347
RPL18	16.8773	16.6113	16.916	16.9359	16.9535	16.9053	16.6615	16.9447	16.7808	17.0502	16.8379	16.7091	16.7366	16.7531	16.1448	16.772	16.9727	16.8288	16.6473	16.9053	16.9535	16.6615	16.8204	16.6615	16.7626	16.8095	16.7366	16.8001	16.7188	16.8571	16.702	16.8204	16.963	16.916	17.0181	16.7366	16.9838	16.8863	16.8773	16.4996	16.8204	16.5382	16.9447	16.6547	16.772	16.8001	16.8204	16.8001	16.8863
FTL	16.3606	16.6334	16.2559	16.487	16.4416	16.4605	16.3332	16.5444	16.5569	16.3869	16.5829	16.745	16.79	16.3802	16.8095	16.8863	16.4008	16.7282	16.6258	16.6334	16.9838	16.8863	16.5762	16.2051	16.2739	16.4153	16.3396	16.3364	16.4545	16.8956	16.8571	16.6689	16.1898	16.467	16.916	16.8773	17.1304	16.677	16.4545	16.7366	16.3396	16.7808	16.4808	16.9359	16.8863	16.7188	16.8379	16.6258	17.0069
LOC401206	16.8001	17.0742	16.745	16.677	16.6939	17.1939	17.056	17.0379	16.8956	16.916	16.5063	16.9447	16.8673	16.6258	17.1585	16.963	17.1737	17.1438	16.9263	17.0181	16.6547	17.1939	16.8379	16.4545	16.79	17.1438	16.9727	16.8288	16.5382	17.0617	16.8773	16.6473	17.0742	16.702	17.0288	16.677	16.6258	17.0742	16.6258	16.5516	16.8863	17.0955	16.745	16.772	16.4347	16.57	16.4416	16.677	16.8379
RPS10	16.9447	16.916	16.79	16.8476	16.8095	17.1585	17.2501	16.745	16.963	16.6404	16.745	17.0838	16.8095	16.6189	17.2184	16.9838	16.8095	16.9727	16.7626	16.8773	17.0617	17.0742	16.9535	16.5829	16.9969	17.0288	16.6615	16.7282	16.5256	17.1057	16.963	16.745	16.8956	16.8379	17.1117	16.6034	16.8204	16.7091	16.8379	16.2994	16.9535	17.0379	16.8476	16.5634	16.5516	16.7531	16.6851	16.7282	16.6113
LOC441876	16.8379	17.0181	16.8476	16.7808	16.7808	16.7626	16.8095	16.8571	16.7091	16.9535	16.7808	17.0288	17.0288	16.6939	16.8818	16.8095	16.6895	16.8956	16.8571	16.7366	16.8773	17.2184	16.6034	16.6547	17.0441	16.745	16.6258	16.7531	16.7282	17.0742	16.9053	16.6113	16.5829	16.8956	16.6547	16.7282	16.8571	17.0288	16.745	16.5569	17.0181	16.916	17.1939	16.7366	16.6615	16.745	16.6689	16.7626	16.7091
PDE4C	16.5444	16.3733	16.5187	16.6189	16.4996	16.4347	16.6547	16.5063	16.8379	16.4078	16.5187	16.7626	16.702	16.7188	16.5966	16.422	16.6189	16.4078	16.5382	16.5516	16.7366	16.7188	16.5516	16.9535	16.5124	16.6547	16.57	16.8095	16.6851	16.7188	16.6939	16.677	16.4545	16.6113	16.57	16.6473	16.5762	16.2477	16.3869	16.8476	16.5516	16.6473	16.8095	16.5966	16.7626	16.4545	16.4808	16.702	16.2331
RPS6	17.1939	17.0069	16.8095	16.8288	16.702	16.8571	16.5516	17.1057	16.8001	17.1178	16.7366	17.0502	17.0955	16.6334	17.0288	16.4739	16.8863	17.0069	16.7282	16.8673	16.7282	17.0181	16.6851	16.5634	17.0742	16.9447	16.79	16.7626	16.702	17.0288	17.1057	16.7282	17.0288	16.7091	16.8956	16.6851	17.1438	17.1057	16.8288	16.5382	17.0838	16.8379	16.9727	16.5569	16.4416	16.4808	16.59	16.7366	16.8001
HBA2	15.8544	16.9535	16.2477	15.7907	15.887	16.772	16.8956	15.4754	16.8673	15.6456	17.2501	16.9727	16.3131	16.9838	16.2051	16.745	16.1138	16.5516	15.5983	16.2776	15.0071	15.14	15.7038	14.8509	16.8476	16.4416	17.1438	15.8742	17.0181	16.9727	16.5829	16.3469	15.0284	16.1138	17.0742	17.1057	16.088	16.1382	17.3057	17.0288	14.5204	16.7366	17.1585	17.1737	17.1737	17.1939	17.0955	15.152	16.8773
S100A9	16.0445	16.467	16.3332	16.5256	16.5569	16.9447	16.6851	16.4288	16.1448	15.8784	16.3869	16.8001	16.4808	16.1615	16.3802	16.6547	16.6034	16.3869	16.1615	16.3195	16.5444	16.6258	16.6615	15.2501	15.887	16.1967	16.5762	16.0268	16.6547	16.4996	16.5382	16.5634	16.3941	16.5966	16.8863	16.7808	16.6189	16.6258	16.3733	16.8571	16.4288	16.8204	16.2331	16.5382	16.5124	16.6113	16.9727	16.4347	16.7531
RPS28	16.4996	16.3941	16.772	16.6334	16.7091	16.3941	16.8288	16.6615	16.7626	16.6034	16.79	16.5966	16.6615	16.6689	16.6404	16.7531	16.5569	16.6151	16.7531	16.6547	16.8863	16.702	16.5319	16.5762	16.5634	16.6404	16.6189	16.6404	16.6189	16.6615	16.6689	16.5762	17.0379	16.4288	16.5319	16.5634	16.3671	16.4288	16.7531	16.3733	16.6615	16.8956	16.4638	16.5063	16.7188	16.8095	16.7808	16.745	16.6851
SHCBP1	16.4545	16.6034	16.7282	16.7091	16.6113	16.4739	16.5829	16.3802	16.7282	16.677	16.6689	16.4605	16.263	16.745	16.467	16.3869	16.6258	16.79	16.4996	16.018	16.5762	15.8621	16.7188	16.5966	16.487	16.2051	16.5829	16.6034	16.6334	16.3265	16.2477	16.9727	16.0706	16.6034	16.5966	16.6258	16.3869	15.6772	16.4996	16.8288	16.5634	16.3733	16.5444	15.9727	16.2776	16.6473	16.677	16.6851	16.0359
B2M	16.8204	16.702	16.2923	16.4347	16.2198	16.6369	16.2135	16.4996	16.57	16.5444	16.3469	16.7366	16.59	16.4996	16.8476	16.6851	16.4605	16.422	16.3733	16.7531	16.3941	16.8773	16.2739	16.009	16.4347	16.3869	16.3606	16.2269	16.2135	16.3733	16.3802	16.6334	16.6547	16.4474	16.6939	16.6689	16.9053	16.7531	16.4078	16.6404	16.5319	16.7091	16.4936	16.8476	16.6547	16.5444	16.5187	16.6334	16.677
LOC649150	16.8476	16.8288	16.57	16.7188	16.5063	16.8204	16.4153	16.8956	17.0502	16.7531	16.5516	17.1737	17.1304	16.6851	16.8379	16.3802	16.7188	16.57	16.772	16.916	16.3265	17.0379	16.5124	16.487	16.8379	17.3057	16.8673	16.59	16.5569	17.1178	16.8863	16.3802	17.0069	16.6189	16.9727	16.745	16.4996	16.9838	16.772	16.3606	16.79	16.7531	16.3332	16.702	16.5634	16.6404	16.6258	16.7188	16.6258
H3F3A	16.6473	16.4416	16.1048	16.4153	16.1138	16.1237	16.3057	15.9387	16.1237	16.1685	16.1752	16.916	16.5124	16.1306	16.6034	16.6404	16.0614	16.3131	16.2923	16.3396	16.2776	16.59	16.1752	15.6299	15.8144	16.263	16.08	15.9812	16.1615	16.487	16.4739	16.4347	16.4008	16.3131	16.7366	16.5187	17.0288	16.8956	16.2135	16.9727	16.263	16.8095	16.2839	16.8379	16.7531	16.3057	16.57	16.6615	16.4936
LOC388474	16.5762	16.5762	16.7091	16.702	16.6851	16.9359	16.7808	16.8673	16.6473	16.7188	16.7188	16.8956	16.6334	16.702	16.6113	16.3606	16.5319	16.8001	16.677	16.8476	16.7531	16.8001	16.6473	16.5382	16.6689	16.8476	16.59	16.5256	16.6034	16.5319	16.9359	16.5966	16.5569	16.7366	16.9263	16.5762	16.79	16.702	16.6189	16.4474	16.7626	16.7626	16.6689	16.6334	16.5829	16.7366	16.6334	16.6939	16.6547
HLA-A	17.0069	16.79	16.4545	16.4808	16.5444	16.6473	16.7282	16.0614	16.1829	16.7282	16.5319	16.8379	16.6113	16.5319	16.7188	16.5569	16.6895	16.8571	16.5762	16.5444	16.1967	16.57	16.3733	16.4808	16.4474	16.963	16.8001	16.5187	16.1829	16.702	16.57	16.4936	17.1585	16.3469	16.702	16.702	16.677	16.5124	16.3538	16.7626	16.3469	16.5966	16.5829	16.8204	16.5382	16.5124	16.3733	16.6473	17.0742
LOC643509	16.3469	16.5256	16.4078	16.4936	16.7282	16.5256	16.3396	16.467	16.6113	16.3265	16.4739	16.2477	16.5634	16.7282	16.1048	16.6334	16.5444	16.4545	16.7366	16.5256	16.3869	16.4078	16.6689	16.9053	16.4288	16.6189	16.6689	16.5829	16.8288	16.1752	16.4545	16.7139	16.5187	16.5634	16.2559	16.5444	16.4808	16.3195	16.3802	16.9263	16.3195	16.6689	16.5063	16.5444	16.4288	16.2994	16.2923	16.5634	15.9991
MGC29891	16.6258	16.4008	16.3802	16.4416	16.57	16.4008	16.4288	16.8288	16.5516	16.4839	16.487	16.1752	16.1615	16.6547	16.3733	16.7626	16.7531	16.5382	16.6404	16.5966	16.6034	16.3869	16.6547	16.8476	16.963	16.08	16.702	16.5634	16.7091	16.2399	16.0359	16.9053	16.4739	16.4739	16.1536	16.5319	16.0528	16.3538	16.2776	16.8204	16.2994	16.5063	16.7808	16.3671	16.7091	16.4008	16.4347	16.6034	16.1829
RPL6	16.9535	16.8863	16.6113	16.5829	16.6547	17.0069	16.7626	16.963	16.5762	16.7808	16.3941	16.772	16.8476	16.3941	16.9359	16.4996	16.7626	16.4936	16.5966	16.7626	16.5829	17.0288	16.6258	16.3469	16.6113	17.0502	16.7091	16.677	16.4474	16.6939	16.5634	16.6034	16.9838	16.6473	16.79	16.6189	16.772	17.2184	16.5319	16.4288	16.8379	16.8476	16.3057	16.5731	16.2701	16.5569	16.5569	16.5516	16.7188
AIRE	16.4008	16.6939	16.5319	16.6473	16.5516	16.2994	16.6404	16.4605	16.487	16.3332	16.4416	16.5516	16.4474	16.677	16.5319	16.5516	16.4288	16.59	16.57	15.9472	16.7626	16.066	16.8476	16.6689	16.5063	16.2776	16.677	16.6189	16.5966	16.3195	16.3057	16.7764	16.0614	16.5516	16.4153	16.3941	16.3606	15.8544	16.263	16.6851	16.3941	16.3195	16.8288	16.3131	16.4739	16.4416	16.5124	16.59	16.1048
PFN1	16.772	16.7091	16.4008	16.6615	16.6689	16.6189	16.772	16.6334	16.1306	16.4288	16.3671	16.4808	16.487	16.2399	16.4808	16.5382	16.0706	16.487	16.3265	16.2559	16.4474	16.6113	16.4808	16.1306	16.088	16.5634	16.3538	16.2135	16.1536	16.263	16.1829	16.5516	16.7188	16.6939	16.4808	16.487	16.1138	16.745	16.3396	16.8673	16.467	16.6939	16.487	16.6189	16.7366	16.6547	16.6939	16.6547	16.9263
TMSB10	16.4347	16.422	16.4605	16.4474	16.59	16.3195	16.2923	16.1685	16.3606	16.4347	16.5634	16.6034	16.6189	16.5516	16.6189	16.7282	16.4545	16.7055	16.2776	16.5063	16.4936	16.2923	16.3396	16.3195	16.1492	16.3469	16.2051	16.3671	16.4739	16.2269	16.3265	16.5829	16.4474	16.57	16.4936	16.5516	16.6939	16.4936	16.4474	16.467	16.3802	16.5634	16.4347	16.59	16.6851	16.772	16.7282	16.5966	16.8288
GNB2L1	16.7531	16.5966	16.6258	16.5319	16.6034	16.451	16.6113	16.7808	16.5124	16.5569	16.5762	16.4078	16.5829	16.6615	16.6334	16.4288	16.3802	16.4474	16.4936	16.5829	17.0069	16.6851	16.5256	16.3671	16.7531	16.79	16.651	16.5762	16.3941	16.7626	16.5569	16.5569	16.4078	16.6689	16.6473	16.5124	16.6334	16.3802	16.6334	16.3869	16.5569	16.4288	16.7282	16.467	16.5187	16.4936	16.5256	16.6189	16.5966
RPL38	16.4416	16.745	16.467	16.5063	16.5124	16.8095	16.422	16.7091	16.702	16.5516	16.6404	16.8571	16.8956	16.59	16.6615	16.677	16.8476	16.963	16.745	16.57	16.4739	17.0069	16.3941	16.422	16.7366	16.9535	16.2701	16.7808	16.4605	17.0379	17.0955	16.3396	16.8863	16.5124	16.8571	16.5966	16.8673	16.59	16.422	16.3469	16.7091	16.8863	16.59	16.7091	16.5966	16.6189	16.5829	16.3869	16.5634
LOC389517	16.2269	16.57	16.4936	16.6939	16.6334	16.3131	16.6689	16.3057	16.2776	16.3941	16.5444	16.57	16.4008	16.7091	16.2559	16.5829	16.2994	16.5829	16.3396	15.9812	16.6689	16.2051	16.6939	16.6113	16.5762	16.3538	16.3869	16.6334	16.6113	16.4288	16.3671	16.702	16.1306	16.5569	16.5382	16.57	16.4474	15.7354	16.3195	16.6258	16.4347	16.5444	16.4739	16.422	16.4008	16.5382	16.4936	16.5319	15.7983
LOC389435	16.8863	16.5829	16.59	16.7282	16.6615	16.963	16.9053	16.8379	16.6689	16.5063	16.6851	16.5124	16.5256	16.5256	16.9969	16.5063	16.7808	16.7055	16.6851	16.702	16.745	16.79	16.57	16.3941	16.8001	16.5124	16.651	16.745	16.5516	16.5256	16.7626	16.4605	16.6615	16.6404	16.7091	16.4739	16.7188	16.6851	16.6689	16.2331	16.6547	16.5516	16.6404	16.6258	16.2559	16.59	16.5762	16.6113	16.6939
RPL18A	16.5382	16.5634	16.8379	16.772	16.7531	16.8773	16.8379	16.677	16.677	16.7091	16.702	16.4739	16.5187	16.5829	16.7366	16.8476	16.467	16.4739	16.5063	16.59	16.6939	16.5444	16.7091	16.467	16.5829	16.5762	16.467	16.702	16.6939	16.4347	16.4936	16.4416	16.7808	16.7531	16.6189	16.4153	16.5319	16.6689	16.7626	16.3195	16.487	16.4416	16.8571	16.5829	16.6034	16.8204	16.7366	16.7091	16.5516
LOC440733	16.7188	16.8095	16.6404	16.5382	16.7626	16.6547	16.7188	16.8001	16.6258	16.6334	16.6334	16.4416	16.4739	16.4416	16.6939	16.5319	16.6334	16.6404	16.702	16.677	16.6404	16.4008	16.6189	16.3733	16.6615	16.3802	16.5124	16.6258	16.2701	16.4416	16.4288	16.6547	16.3265	16.6615	16.4008	16.4605	16.57	16.6404	16.5063	16.2559	16.5256	16.2051	16.702	16.4936	16.7282	16.702	16.6404	16.4936	16.5187
PNPT1	16.59	16.5063	16.3538	16.422	16.4288	16.3057	16.745	16.3733	16.5444	16.3195	16.1967	16.2701	16.2331	16.5634	16.4605	16.6473	16.5187	16.3733	16.467	16.2051	16.7188	16.3802	16.745	16.6851	16.772	16.1448	16.6034	16.4416	16.57	16.2198	16.1752	16.6404	16.2198	16.3396	16.2051	16.4936	16.2477	16.0528	16.1615	16.5762	16.3265	16.3941	16.8204	16.2701	16.5444	16.2839	16.3396	16.4605	15.7668
RPS11	16.8673	16.7531	16.5634	16.5966	16.5829	16.7808	16.6258	16.5634	16.5256	16.702	16.59	16.6334	16.4996	16.5966	16.6258	16.5124	16.8288	17.0379	16.4153	16.4347	16.5063	16.963	16.4739	16.4347	16.9359	16.7531	16.4996	16.6473	16.3057	16.8204	16.6851	16.59	17.0617	16.677	16.6851	16.6113	16.5829	16.8476	16.6034	16.4739	16.6939	16.702	16.5966	16.6113	16.3057	16.7282	16.5382	16.487	16.702
LOC389787	16.5634	16.7282	16.4288	16.4605	16.3057	16.702	16.3802	16.4739	16.6547	16.5966	16.3733	16.6258	16.6689	16.422	16.5256	16.6034	16.677	16.6473	16.59	16.6113	16.6473	16.9053	16.1685	16.2399	16.5319	16.6473	16.5256	16.4605	16.677	16.5829	16.7188	16.57	16.6404	16.4008	16.6615	16.4808	16.6473	16.6034	16.4808	16.59	16.6851	16.9969	16.2135	16.6851	16.5256	16.3733	16.4474	16.4008	16.6438
RPS19	16.677	16.5516	16.5382	16.6547	16.5762	16.8673	16.6473	16.8204	16.6189	16.467	16.6547	16.2269	16.0968	16.5187	16.1752	16.6258	16.4808	16.772	16.4347	16.6939	16.4808	16.2331	16.702	16.4153	16.7091	16.1306	16.422	16.5382	16.3195	16.6689	16.08	16.6258	16.916	16.6851	16.1685	16.5256	16.3802	16.5256	16.5569	16.3671	16.5382	16.5762	16.7091	16.3332	16.6189	16.6615	16.6473	16.4808	16.7282
GGA1	16.2701	16.2994	16.2198	16.2135	16.4545	15.9472	16.5187	16.4474	16.3469	16.1829	16.3131	16.3941	16.3941	16.6473	16.3606	16.4347	16.6473	16.3941	16.5319	16.3671	16.3538	16.5569	16.6113	16.8673	16.5382	16.4008	16.4808	16.3195	16.5829	16.3606	16.2559	16.8773	16.9969	16.4153	16.1967	16.3469	16.8288	16.2051	16.1898	16.79	16.2198	16.3869	16.772	16.009	16.1138	16.1898	15.8784	16.3671	15.6694
LOC402057	16.9727	16.9727	16.5516	16.6404	16.467	16.57	16.5382	16.7324	16.8204	16.8204	16.6189	16.7854	16.4347	16.4474	16.9535	16.6189	16.6615	16.745	16.5516	16.4808	16.6113	16.8288	16.4996	16.3802	17.0069	16.5829	16.5634	16.6939	16.3469	16.6547	16.4474	16.467	16.5516	16.487	16.772	16.5569	16.745	16.9535	16.5634	16.4153	16.702	16.5829	16.5382	16.4474	16.3802	16.467	16.467	16.422	16.745
FTHL8	16.0706	16.1382	15.9298	15.887	15.8306	15.8621	15.9631	16.3195	16.2477	16.08	16.3265	16.4996	16.2269	16.2331	16.5569	16.9727	16.7282	16.3671	16.6189	16.8379	16.4545	16.6334	16.5829	15.9727	16.3057	16.3606	16.487	16.5569	16.2776	16.5063	16.5966	16.487	16.4288	15.9342	16.3265	16.6547	16.467	16.6113	15.7038	16.4936	15.8943	16.6258	16.3396	16.4996	16.8571	16.1448	16.4605	16.5731	16.4808
RPL11	16.4936	16.8001	16.6939	16.5762	16.677	16.8379	16.3606	16.6851	16.4545	16.6547	16.4996	16.4288	16.6258	16.5063	16.677	16.4416	16.8204	16.8095	16.5569	16.3869	16.3057	16.5156	16.6404	16.3332	16.5187	16.6615	16.4739	16.3469	16.5762	16.3538	16.4808	16.4545	16.79	16.6334	16.5829	16.4347	16.4008	16.8673	16.4936	16.3802	16.6034	16.5256	16.422	16.5187	16.6689	16.487	16.5966	16.5444	16.5256
RPL37A	16.916	16.4808	16.5063	16.1536	16.4936	16.8001	16.487	16.4936	16.4808	16.5634	16.677	16.2051	16.3538	16.088	16.5444	16.3332	16.59	16.4996	16.5829	16.4474	15.9121	16.1138	16.5444	16.3396	16.6939	16.1382	16.6113	16.6851	16.59	16.4739	16.3606	16.4739	16.6258	16.6258	15.7425	16.3396	16.2331	16.6615	16.6113	16.4078	16.5762	16.3671	16.4008	16.2559	16.5569	16.5063	16.4008	16.5731	16.3802
C21orf55	16.6189	16.2839	16.3131	16.3057	16.4605	16.3469	16.2839	16.3606	16.3131	16.2399	16.3195	16.3332	16.2477	16.4545	16.1536	16.3195	16.4153	16.2269	16.4078	16.4008	16.4008	16.4288	16.4008	16.7188	16.5256	16.2399	16.5063	16.3802	16.5319	16.1138	16.1685	16.5124	16.1752	16.4416	16.1615	16.5382	16.0968	16.3396	16.2559	16.8863	16.2839	16.467	16.4474	16.4008	16.6258	16.3606	16.4288	16.4996	16.0706
LOC651894	16.9263	16.3163	16.6547	16.6689	16.5187	16.5063	16.6034	16.5762	16.8288	16.8001	16.6113	16.2923	16.4288	16.5124	16.5731	16.4153	16.3265	16.5063	16.4545	16.8001	16.4605	16.3941	16.677	16.3606	16.57	16.4288	16.5319	16.57	16.4936	16.4808	16.422	16.4808	16.677	16.5319	16.3396	16.5063	16.0614	16.7366	16.7282	16.3265	16.8288	16.2477	16.79	16.2135	16.3332	16.4288	16.3671	16.5382	16.59
UBA52	16.745	16.772	16.6615	16.5516	16.5382	16.7366	16.5063	16.5569	16.6034	16.8863	16.6615	16.8476	16.6851	16.5569	16.916	16.4078	16.5966	16.5124	16.6689	16.8288	16.57	16.8673	16.5187	16.4008	16.702	16.8001	16.5516	16.7091	16.3869	16.7366	16.6034	16.5444	16.702	16.5829	16.8379	16.4996	16.5569	16.772	16.5762	16.1448	16.7282	16.1382	16.5124	16.5256	16.3941	16.4347	16.4739	16.4153	16.57
ACTB	16.1752	16.3332	15.8222	16.0968	16.0359	15.8144	16.1829	16.018	16.4187	16.3538	16.1138	16.8095	16.2701	16.1048	16.3332	16.6113	16.1448	16.1615	15.9545	15.9121	16.0968	16.0359	15.9727	16.018	16.0614	16.1898	16.0268	15.9991	15.9991	16.4545	16.3195	16.1448	16.3057	16.1536	16.5187	16.6334	16.59	16.467	16.1829	16.8773	16.2477	16.4474	16.1967	16.4153	16.3538	16.3265	16.3869	16.1536	16.8095
LOC645899	16.8956	16.5187	16.6473	16.4996	16.5256	16.7188	16.2198	16.2399	16.6404	16.7626	16.6258	16.6404	16.6473	16.6034	16.8204	16.5762	16.4739	16.6334	16.4474	16.5634	16.772	16.5829	16.487	16.4288	16.6334	16.4808	16.1752	16.5444	16.3538	16.5382	16.8288	16.4008	16.3538	16.5187	16.677	16.467	16.8379	16.7808	16.59	16.1237	16.6258	16.6034	16.5516	16.5516	16.3606	16.5966	16.4545	16.4739	16.3057
RPS3A	16.8095	16.677	16.5444	16.5634	16.4808	16.5319	16.5966	16.57	16.6334	16.4996	16.4936	16.2994	16.3332	16.3131	16.5187	16.487	16.4474	16.5256	16.5444	16.6258	16.5319	16.3131	16.5063	16.3538	16.6547	16.0614	16.3941	16.4545	16.3131	16.4078	16.0614	16.5256	16.8095	16.5762	16.2839	16.4416	15.8064	16.4153	16.5829	16.2269	16.745	16.2839	16.2923	16.3469	16.487	16.4739	16.4996	16.5187	16.5569
RPL9	16.6547	16.5569	16.6334	16.6113	16.4008	16.8288	16.3131	16.5187	16.5966	16.6113	16.4474	16.9263	16.6939	16.6113	16.772	16.3941	16.5829	16.6851	16.3802	16.8204	16.2839	16.772	16.3869	16.4416	16.6258	16.772	16.5569	16.5516	16.6689	16.6258	16.9263	16.3332	16.7626	16.5382	16.7531	16.4288	16.4545	16.6939	16.6404	16.2399	16.57	16.7188	16.2269	16.6034	16.3733	16.5516	16.5516	16.6689	16.5063
C14orf24	16.6404	16.2477	16.3195	16.1898	16.4474	16.2198	16.2701	16.2269	16.6851	16.3606	16.3057	15.8064	15.9545	16.4078	16.3195	16.1967	16.263	16.263	16.3538	16.1536	16.422	16.0445	16.2331	16.6473	16.8863	15.8144	16.4545	16.5124	16.4008	16.018	15.8064	16.1898	16.0445	16.3671	16.08	16.4545	16.0445	16.2994	16.3671	16.6034	16.3057	16.0968	16.4638	16.0706	16.4078	16.3332	16.3469	16.4416	16.2269
CDAN1	16.5569	16.2269	16.3057	16.3538	16.2839	16.1898	16.5319	16.3869	16.3941	16.2198	16.2135	16.1138	16.2399	16.3733	16.2331	16.5444	16.422	16.3802	16.4739	16.08	16.4996	16.1829	16.5382	16.6258	16.4153	16.1752	16.6334	16.4008	16.4996	15.9812	16.0528	16.6939	16.1685	16.2135	16.2399	16.3802	15.887	16.0268	16.088	16.5444	16.2269	15.8463	16.677	16.3396	16.4936	16.2399	16.2269	16.1967	15.8463
LOC388621	16.5516	16.3538	16.7188	16.6258	16.6189	16.8956	16.5256	16.6258	16.5829	16.5124	16.5966	16.1967	16.2776	16.4008	16.487	16.2839	16.4996	16.5444	16.6034	16.4078	16.6334	16.3671	16.5569	16.3869	16.4638	16.2477	16.4347	16.3869	16.3396	15.9026	15.8701	16.4153	16.7531	16.6547	16.3538	16.3265	15.9812	16.4008	16.6547	16.1752	16.4545	16.1829	16.4078	16.1829	16.6473	16.4605	16.3941	16.5569	16.7366
PDCD7	16.422	16.4347	16.2331	16.3396	16.3733	16.2559	16.4936	16.2994	16.3869	16.1898	16.2923	16.1685	16.2198	16.487	16.4416	16.59	16.3733	16.3195	16.3332	16.2399	16.467	16.2477	16.3538	16.59	16.677	15.9387	16.2839	16.3265	16.5444	15.9991	16.1382	16.5319	16.3802	16.3802	16.2477	16.3671	16.2559	16.1752	16.1752	16.5319	16.2701	16.2701	16.6615	16.2269	16.3195	16.263	16.2198	16.2923	15.9812
RPS20	16.5187	16.8204	16.5762	16.6034	16.5966	16.745	16.4416	16.5966	16.8476	16.6473	16.5569	16.3606	16.5319	16.5444	16.5516	16.4936	16.6689	16.7808	16.487	16.5319	16.487	16.3538	16.3057	16.4936	16.5444	16.4078	16.4288	16.422	16.5634	16.3671	16.3869	16.1967	16.6113	16.5444	16.5516	16.3131	16.3396	16.6547	16.6615	16.2923	16.59	16.0359	16.4416	16.4739	16.2923	16.5256	16.5634	16.467	16.5762
LOC652071	16.6034	16.7626	16.5966	16.3671	16.3869	16.5444	16.4739	16.5124	16.3538	16.5319	16.6034	16.3265	16.7531	16.5762	16.8001	16.0968	16.5124	16.5966	16.6547	16.745	16.2559	16.7531	16.3332	16.4996	16.3265	16.6034	16.4605	16.5966	16.5187	16.2477	16.8673	16.4474	16.3396	16.422	16.2135	16.422	16.6113	16.4416	16.5516	16.2135	16.6113	16.6581	16.3195	16.6404	16.4153	16.4996	16.4153	16.5256	16.467
LOC645895	16.263	16.1448	16.1752	16.1138	16.2399	16.0968	16.3671	16.4008	16.4187	16.1382	16.2269	16.1048	15.8386	16.4808	16.4936	16.9447	16.3195	16.2776	16.4416	16.1237	16.79	16.1382	16.4347	16.6939	16.8204	16.2839	16.5382	16.2198	16.6404	16.3332	16.1536	16.4996	16.4808	16.2923	15.8943	16.3538	16.1576	16.1237	15.9631	16.57	16.1752	16.1448	16.6473	16.1448	16.1898	16.1685	16.0614	16.3195	15.8306
ZNF486	16.2135	16.2331	16.2399	16.3332	16.3538	16.088	16.3195	16.2477	16.1615	16.1967	16.2839	16.2198	16.422	16.57	16.018	16.2776	16.3396	15.9727	16.3606	16.1752	16.3733	16.4545	16.3131	16.7091	16.59	16.3057	16.3265	16.2477	16.6615	16.4153	16.2269	16.5382	16.1048	16.088	16.4288	16.2839	16.3332	15.9906	16.0968	16.487	16.08	16.57	16.5762	16.4545	16.5063	16.1967	16.2477	16.4474	15.9727
ARHGDIB	16.3538	16.3606	16.0706	16.3941	16.2331	16.2331	16.2776	16.2331	16.2269	16.2051	16.1382	16.6113	16.4545	16.2198	16.4347	16.2198	16.088	16.2331	16.08	15.9727	16.1536	16.4416	16.0359	15.8222	15.9991	16.6258	16.2399	15.9387	16.1967	16.4605	16.2198	16.263	16.8773	16.2331	16.5569	16.2923	16.263	16.5569	16.2198	16.6334	16.3131	16.3538	16.263	16.4605	16.4808	16.3802	16.6034	16.2559	16.5444
GJC1	16.3195	16.2051	16.1306	16.1829	16.2269	16.0706	16.1898	16.1898	16.4739	16.1237	16.1898	16.2135	16.3195	16.4347	16.2135	16.4605	16.487	16.1898	16.3941	16.1967	16.8204	16.3332	16.2839	16.772	16.8095	16.2923	16.5187	16.2923	16.6258	16.2135	16.2399	16.422	16.3131	16.2399	16.3195	16.2559	16.1344	16.1967	16.08	16.6615	16.2051	16.4808	16.57	16.3057	16.3131	15.9387	16.1615	16.2701	15.7203
LOC650276	16.6334	16.6189	16.6034	16.57	16.6258	16.5634	16.4996	16.5319	16.5063	16.5256	16.4605	16.3702	16.5569	16.467	16.4153	16.4474	16.3469	16.2399	16.4605	16.5187	16.5382	16.5382	16.4545	16.4739	16.4996	16.7626	16.4936	16.4808	16.4153	16.4474	16.3538	16.2923	16.3469	16.5256	16.5063	16.4474	16.2135	16.4347	16.702	16.2477	16.5829	16.263	16.2994	16.487	16.3469	16.4474	16.422	16.4545	16.4739
AKR1D1	16.2399	16.1138	16.2051	16.263	16.3941	16.1138	16.1967	16.1536	16.3057	16.1448	16.2331	16.1898	16.1898	16.3671	16.1306	16.4008	16.1237	16.1752	16.2994	16.1306	16.4078	16.2135	16.3802	16.6189	16.3131	16.0445	16.4153	16.4474	16.487	16.0614	16.088	16.3905	15.887	16.3057	16.0614	16.3332	15.8306	15.8701	16.1382	16.3941	16.1382	15.9387	16.4153	16.4078	16.59	16.2776	16.2701	16.3941	16.0268
RPS15A	16.6851	16.6547	16.4739	16.4545	16.4347	16.7282	16.5762	16.4078	16.3733	16.772	16.4545	16.59	16.745	16.3195	16.8818	16.2994	16.4078	16.5634	16.3469	16.7091	16.5634	16.6189	16.4416	16.1382	16.2739	16.7188	16.4416	16.4996	16.2331	16.6334	16.6615	16.3733	16.6851	16.3733	16.6689	16.3057	16.4739	16.5319	16.5444	16.2051	16.4605	16.4996	16.3671	16.5319	16.2839	16.3869	16.2135	16.2051	16.5319
SLC44A4	16.2477	16.1829	16.1685	16.2559	16.4153	16.1829	16.3733	16.2559	16.4078	16.088	16.2399	15.9906	16.1237	16.3869	16.1898	16.1752	16.2269	16.3057	16.2198	15.9991	16.263	15.8943	16.467	16.5516	16.2839	16.0359	16.4474	16.3941	16.3265	16.1448	15.8463	16.6189	15.9298	16.2994	15.9121	16.2994	15.6617	15.7668	16.0268	16.5829	16.1448	15.8943	16.6113	16.2477	16.422	16.3195	16.3131	16.3396	15.7825
RPS17	16.5063	16.4966	16.5256	16.59	16.487	16.6689	16.4474	16.3364	16.2051	16.6689	16.5124	16.487	16.3733	16.3606	16.4008	16.2331	16.3941	16.5762	16.6334	16.3265	16.4416	16.3606	16.2994	16.4605	16.4739	16.5063	16.2559	16.4936	16.422	16.3131	16.3131	16.3195	16.6473	16.5063	16.4382	16.4078	16.9359	16.3941	16.487	16.3538	16.5124	16.5319	16.3538	16.1685	16.1382	16.4078	16.3332	16.3733	16.422
PSAP	16.1898	16.2135	15.9545	16.3195	16.3606	16.3332	16.0359	16.3538	16.2198	15.9991	16.08	16.5569	16.0706	16.1448	16.3941	16.3265	16.0268	16.3469	15.9812	15.887	16.1382	15.7739	16.1615	15.6542	15.7203	15.5756	16.0359	15.7983	16.1685	16.1536	15.8222	16.3905	15.9121	16.3195	16.5444	16.6939	15.7825	16.4996	15.9812	16.6151	16.1615	16.0445	16.3469	16.4416	16.4545	16.4153	16.5319	16.2269	16.6034
LOC642947	16.2923	15.9631	16.08	16.2994	16.263	15.9991	16.009	16.263	16.2839	15.9121	16.0528	16.3057	16.2994	16.4936	16.1685	16.3538	16.3131	15.9906	16.1967	16.088	16.3332	16.1048	16.263	16.745	16.3802	16.3733	16.2923	16.2994	16.6473	16.422	16.2776	16.2701	15.9906	16.0614	16.1898	16.1829	16.1685	16.1138	16.2269	16.4545	16.009	16.2135	16.3941	16.3802	16.467	16.1138	16.1306	16.4078	15.7496
FKTN	16.1448	16.1615	16.018	16.2399	16.3332	16.0445	16.1536	16.1048	16.2399	16.1752	16.2559	15.9472	15.9387	16.2269	16.1382	16.1237	16.2776	16.1237	16.3671	16.1685	16.5256	16.1448	16.4474	16.57	16.3332	15.9727	16.3671	16.3538	16.3733	15.9631	16.009	16.5187	16.1237	16.2198	16.1048	16.2477	15.921	15.9387	15.9991	16.5634	16.018	15.9121	16.3733	16.2331	16.4474	16.1048	16.2776	16.3469	15.8784
LOC649548	16.4739	16.5319	16.4474	16.5187	16.5634	16.7531	16.4078	16.6547	16.4474	16.79	16.5382	16.467	16.1536	16.4288	16.963	16.1685	16.6547	16.467	16.4808	16.6689	16.1685	16.5156	16.4153	16.3057	16.4416	16.5516	16.3733	16.6615	16.4078	16.3396	16.5762	16.3671	16.6189	16.4545	16.6034	16.2051	16.5063	16.2923	16.5187	16.1306	16.4008	16.4903	16.2399	16.1898	15.9906	16.1306	16.1829	16.263	16.08
ACTG1	15.921	16.1536	15.7279	16.2269	16.1048	15.9631	15.8943	16.1615	15.8784	16.066	15.9545	16.677	16.4416	16.0528	16.2198	16.0614	16.009	16.1967	15.9727	16.0706	15.9812	16.467	15.8701	15.7203	15.6694	16.4605	15.9121	15.8064	16.009	16.1898	16.2994	16.1048	16.57	16.1448	16.422	16.2198	16.5516	16.5516	16.1138	16.6151	16.2331	16.8571	15.7907	16.3905	16.2051	16.2701	16.2839	16.1898	16.5382
LOC284821	16.6689	16.5444	16.6189	16.2839	16.3195	16.422	16.2331	16.1829	16.772	16.6939	16.422	16.7282	16.5382	16.4605	16.5124	16.2051	16.2923	16.6615	16.5634	16.4739	16.4153	16.6547	16.2477	16.4078	16.7188	16.8379	16.1536	16.5319	16.3606	16.5516	16.6547	16.2776	16.4936	16.3606	16.3802	16.59	16.3733	16.5187	16.7091	16.0614	16.6473	16.2776	16.2701	16.4347	16.2331	16.5829	16.6189	16.5063	16.4288
LOC391656	16.6615	16.4474	16.422	16.2477	16.0528	16.467	16.1685	16.3364	16.4347	16.4416	16.4808	16.4153	16.6034	16.3332	16.6473	16.2701	16.1752	16.4808	16.4288	16.5124	16.2701	16.6939	16.1237	16.2994	16.3869	16.5319	16.2269	16.4153	16.3671	16.467	16.5256	16.2051	16.7282	16.1752	16.3332	16.2701	16.7091	16.5382	16.4739	16.3131	16.5444	16.4347	16.088	16.2051	16.263	16.3538	16.2331	16.2135	16.4008
FTHL7	15.6617	15.9121	15.7587	15.7496	15.7739	16.018	15.9026	15.8544	16.08	15.8064	16.2776	16.1536	15.7587	16.2135	16.7808	16.916	16.4416	16.2559	16.5187	16.2198	16.59	16.8476	16.4936	15.5668	16.1306	15.7118	16.1382	16.1719	15.9387	16.3469	16.4996	16.3538	15.7279	15.9631	16.2269	16.2776	16.9969	16.1306	15.5668	16.1382	15.7825	16.4545	16.0968	16.3606	16.745	16.0614	16.2051	16.2839	16.3671
LOC402251	16.3671	16.4545	16.2776	16.1752	16.0268	16.1382	15.9906	16.5829	16.1898	16.4474	16.2477	16.0359	16.2839	16.263	16.8571	16.2923	16.5762	16.2135	16.2135	16.4416	16.1615	16.4936	15.9812	16.263	16.2135	16.5444	16.4078	16.1898	16.4808	16.2701	16.4605	16.1536	16.487	16.2477	16.009	16.3869	16.3057	16.3671	16.4008	16.2701	16.6189	16.59	16.018	16.3733	16.2994	16.5187	16.487	16.3538	16.4474
CREB1	16.1685	15.9545	16.0614	16.08	16.2135	16.1048	16.018	16.1448	16.263	15.9026	16.1615	16.4008	16.2923	16.2701	16.1967	16.4545	16.3606	15.9631	16.1829	16.2269	16.4347	16.3469	16.2923	16.8288	16.3469	16.5569	16.2776	16.1306	16.5124	16.1237	16.0968	16.3131	16.1829	16.0968	15.8144	16.1685	16.2399	15.7983	15.9387	16.4605	16.0968	16.4078	16.5634	16.4808	16.2399	16.009	15.9545	16.1752	15.5756
LOC388524	16.5256	16.6473	16.487	16.5124	16.4739	16.6615	16.6334	16.59	16.4936	16.8095	16.6473	16.3869	16.3869	16.3396	16.6689	16.263	16.4936	16.4605	16.5256	16.4996	16.2135	16.5634	16.4605	16.3131	16.5516	16.4996	16.6939	16.4288	16.2559	16.0445	16.4078	16.08	16.8476	16.59	16.4474	16.4008	16.3131	16.5444	16.677	15.9631	16.7531	16.2923	16.1536	16.1752	16.1685	16.422	16.3802	16.3802	16.2135
RPL7L1	16.2994	16.08	16.1237	16.1615	16.2559	15.9906	16.1615	16.1752	16.009	16.009	16.1536	15.8621	15.8306	16.3469	15.921	16.2269	16.1685	16.1382	16.3195	16.0614	16.5124	15.7587	16.4078	16.5319	16.4008	15.8621	16.4008	16.2331	16.2994	15.9472	15.7825	16.4288	15.9991	16.2559	15.7354	16.1967	15.5983	15.9026	16.0614	16.4347	15.9906	15.8222	16.4288	15.8621	16.3671	16.1615	16.1967	16.2399	15.7118
LOC645683	16.3131	16.4966	16.7531	16.4078	16.3265	16.263	16.1048	16.2701	16.5634	16.5187	16.5256	16.08	16.4153	16.5382	16.4288	16.3057	16.2559	16.2994	16.263	16.4153	16.4288	16.3195	16.2739	16.5256	16.4808	16.6113	16.1138	16.3606	16.4416	16.6034	16.3941	16.1237	16.422	16.4605	16.3869	16.3195	16.3469	16.3869	16.7366	16.1048	16.4474	16.422	16.2559	16.1048	16.1536	16.6034	16.3606	16.5124	16.2051
IL18	16.487	16.0445	16.0445	16.1048	16.1382	16.1536	16.4008	16.1382	16.2994	16.0968	16.0614	15.9026	16.1829	16.3538	16.009	16.1898	16.2135	16.1448	16.2399	16.1382	16.3469	16.1967	16.2135	16.6034	16.422	16.1138	16.3469	16.3364	16.467	16.0268	16.0268	16.1752	15.8784	16.0359	15.8222	16.1615	15.8386	15.6383	16.018	16.5124	16.1138	16.3057	16.3606	16.1967	16.3396	15.9906	16.1237	16.2331	15.8222
LOC400963	16.3802	16.3396	16.4808	16.467	16.6473	16.59	16.3941	16.487	16.6939	16.4545	16.4008	16.5256	16.3396	16.2994	16.2269	16.1536	16.08	16.3332	16.422	16.4288	16.2923	16.4996	16.3606	16.2198	16.2477	16.3396	16.1685	16.3131	16.1898	16.2776	16.263	16.1138	16.2135	16.4936	16.4605	16.2331	16.3941	16.5063	16.467	15.9727	16.4153	16.1967	16.2198	16.2839	16.1306	16.3131	16.263	16.3057	16.3469
LOC441034	16.3057	16.3057	16.3869	16.3469	16.3469	16.4078	16.3869	16.3469	16.3396	16.3671	16.2051	16.5063	16.4936	16.1829	16.3469	16.0268	16.1382	16.08	16.3869	16.2839	16.2399	16.5762	16.3469	16.2559	16.1237	16.3671	16.1898	16.088	16.1448	16.6189	16.6473	16.0706	16.263	16.3538	16.5634	16.263	16.487	16.3057	16.3131	15.9991	16.4416	16.3606	16.2477	16.3905	16.2198	16.3469	16.1048	16.2198	16.3195
SLC16A12	16.1615	15.9906	16.009	16.1237	16.1536	15.9026	15.921	16.1967	16.2331	15.887	16.0706	15.9727	16.1967	16.2923	16.1829	16.3733	16.2051	15.9991	16.1898	16.0968	16.3131	16.2839	16.1829	16.5569	16.3538	16.0268	16.3131	16.1829	16.5063	16.1685	15.9991	16.3057	15.9545	16.0268	16.018	16.088	15.9631	15.9121	15.9906	16.4416	15.9991	15.8544	16.6223	16.1138	16.1967	15.887	15.9812	16.0706	15.5352
LYZ	16.1138	16.0968	15.2357	15.3771	16.0968	15.7279	16.08	16.2923	16.1536	16.2839	15.7907	16.4474	16.1306	15.1268	16.5382	16.3671	16.4347	15.8544	16.2839	17.0742	16.0528	16.9969	15.5136	14.09	16.1048	15.6383	16.1967	16.0968	15.921	16.6473	16.2051	15.7739	16.3332	16.0445	16.8204	16.5829	16.7808	17.0181	15.2651	16.3057	15.5833	17.0069	15.887	16.8001	16.57	15.9298	16.79	16.2477	17.1057
LOC728481	16.3265	16.2701	16.4416	16.2923	16.2051	16.3396	16.2559	16.3265	16.3332	16.4936	16.3332	16.2839	16.0359	16.2477	16.2399	16.1615	16.3538	16.3265	16.3057	16.3802	16.0706	16.088	15.9026	16.2135	16.2331	16.3265	16.2135	16.4078	16.2269	16.2559	16.4008	16.1382	16.5444	16.1829	16.2776	16.2399	15.8463	16.1685	16.4416	15.9906	16.5187	15.9991	16.2051	16.2198	16.1829	16.5319	16.3265	16.3265	16.487
LOC653314	16.2559	16.2559	16.4996	16.3869	16.422	16.4288	16.3469	16.4416	16.3195	16.4605	16.263	16.1415	16.4078	16.1967	16.2477	16.08	16.3869	16.3606	16.2701	16.3538	16.2051	16.1536	16.422	16.2701	16.2399	16.2994	16.3057	16.3057	16.3802	15.9906	16.2135	16.2477	16.7366	16.4996	15.9991	16.3606	16.2701	16.8095	16.3606	15.9472	16.4078	16.1237	16.1898	16.0268	16.018	16.1382	16.0445	16.2776	16.2839
RPL27A	16.4153	16.3163	16.3671	16.3265	16.1615	16.4936	16.4347	16.3671	16.3265	16.2331	16.2198	16.263	16.2559	16.1752	16.3538	16.3131	16.2399	16.4008	16.2331	16.3733	16.3195	16.2776	16.3671	15.9545	16.4078	16.1615	16.0706	16.263	16.0968	16.3802	16.3469	16.1306	16.5762	16.3332	16.3671	16.1306	15.9298	16.2839	16.3057	16.0528	16.3733	16.08	16.3869	16.3195	15.9387	16.2477	16.2399	16.3332	16.3606
RPS14	16.6939	16.4605	16.5124	16.3733	16.2701	16.4153	16.2399	16.1271	16.6615	16.4739	16.4078	16.2559	16.3606	16.3265	16.7091	16.1382	16.1898	16.4347	16.5124	16.5382	16.3802	16.3057	16.2559	16.1967	16.3733	16.1237	16.1448	16.5063	16.2399	16.3941	16.4153	16.3606	16.4416	16.3869	16.3131	16.2135	16.4153	16.4605	16.5256	16.0359	16.4996	16.1536	16.2776	16.2776	16.0614	16.2269	16.4078	16.3606	16.4078
S100A4	15.8943	15.8463	15.6858	16.0268	16.1752	16.1685	16.0614	15.9545	15.6228	15.7825	15.7496	16.5187	15.6694	15.8222	16.2701	16.2399	16.018	16.6034	16.018	16.0445	16.1829	15.7038	16.7531	15.0542	15.7983	15.5906	15.9727	16.1719	15.6858	16.59	16.6189	16.2399	15.7587	16.08	16.0359	16.1048	16.4078	16.2399	15.7668	16.2839	15.695	16.3265	16.009	16.4288	16.1448	16.3396	16.5063	15.9387	16.7626
RPL19	16.2198	16.4078	16.3733	16.4288	16.3802	16.3733	16.2994	16.5516	16.2701	16.4153	16.3538	16.2776	16.084	16.1382	16.5829	16.0445	16.5634	16.2839	16.1237	16.4605	16.2198	16.7808	16.3265	16.1615	16.2198	16.4936	16.3332	16.3733	16.2051	16.1615	16.4347	16.009	16.4996	16.4078	16.263	16.1898	16.6034	16.4078	16.2839	16.1138	16.4739	16.1138	16.1448	16.018	15.8463	15.9727	16.08	16.2994	16.1448
LOC390354	16.1536	16.1898	16.5569	16.4739	16.2994	16.3802	16.2269	16.1271	16.1685	16.2923	16.3606	16.5444	16.57	16.2559	16.0968	15.9991	16.0968	16.0359	16.1306	16.3057	16.1898	16.1752	16.1306	16.1752	16.1492	16.5382	16.0528	16.487	16.08	16.5569	16.467	16.0968	16.2051	16.3941	16.4996	16.1448	16.1237	16.3265	16.3941	15.7668	16.2776	16.1752	16.3131	16.5731	16.3869	16.677	16.6113	16.4288	16.4605
RPL39	16.3396	16.1237	16.1536	16.4008	16.2923	16.4416	16.4605	16.6034	16.2135	16.3131	16.1448	16.2331	16.3802	15.9812	16.5063	16.2477	16.3057	16.2701	16.3131	16.3469	16.1306	16.2559	16.4288	15.9026	16.2269	16.467	16.6404	16.4347	15.9906	16.3869	16.6404	16.0359	16.08	16.263	16.4382	16.0614	16.5256	16.2776	16.3469	15.9121	16.3538	16.3332	16.0528	16.1237	15.8621	15.9812	15.9991	16.08	16.1967
LOC645138	16.4808	16.3671	16.4153	16.3606	16.3671	16.2923	16.263	16.4153	16.2559	16.3469	16.4347	15.9387	15.7983	16.08	16.2776	16.1048	16.2331	16.4416	16.1382	16.422	16.2477	15.9298	16.2198	16.1685	16.2923	15.8943	16.0614	16.1536	16.2198	16.2051	15.8784	16.2198	16.467	16.3265	16.1382	16.018	15.9545	16.3606	16.4153	16.1898	16.3671	16.0614	16.1752	16.1536	16.2269	16.5634	16.3195	16.1306	16.263
LOC729603	16.08	15.8386	15.8621	15.9906	15.9906	15.8701	16.0528	16.2051	16.0614	15.8463	15.7983	15.695	15.887	16.0614	16.0706	16.3469	16.1615	16.0528	16.2559	15.9906	16.3671	15.9121	16.1138	16.5444	16.4936	16.088	16.2994	16.0614	16.2839	15.8544	15.9387	16.2559	16.0359	16.009	15.7983	16.0706	15.9026	15.8784	15.9026	16.5256	15.8544	16.2399	16.5569	15.9991	16.1048	15.9631	15.9472	16.1138	15.5279
ITGB2	16.0359	16.2198	15.8386	16.009	15.9727	16.2399	15.9342	16.0968	16.1138	15.9812	15.9991	16.3802	16.1048	15.5279	16.0445	16.2559	15.7668	16.088	15.9121	16.0268	15.9991	15.8463	15.9991	15.5279	15.6542	15.8306	16.0968	15.7739	15.695	16.1829	16.1448	16.2135	15.8701	15.9727	16.6258	16.3733	16.0359	16.2198	15.8943	16.4808	16.0359	16.3469	15.9812	15.8144	15.9121	15.8621	16.1685	15.9121	16.4153
RPL27	16.2331	16.2923	16.3265	16.1967	16.0614	16.2051	16.1382	15.9298	16.4288	16.422	16.3802	16.0968	16.3057	16.3057	16.1615	16.1448	15.9906	16.3538	16.2269	16.2923	16.2331	16.1306	16.1382	16.0706	16.1967	16.1685	16.018	16.2399	16.1382	16.1967	16.1138	15.9991	15.8943	16.1237	15.9472	16.2269	16.1048	16.263	16.4347	15.8701	16.2923	15.7907	16.1306	16.08	16.0528	16.2331	16.1752	16.0528	16.2994
RPL35	16.3941	16.0359	16.2701	16.1382	16.4078	16.2701	16.1237	16.0528	16.1382	16.263	16.3396	15.9545	16.009	16.0706	16.3057	16.0706	16.1306	16.1685	16.1448	16.2994	16.0359	15.9387	16.0968	16.1448	16.2994	16.018	15.9545	16.1138	16.0528	15.8943	15.9906	16.2331	16.2331	16.1615	16.2994	16.0445	15.7587	16.1898	16.4288	15.8544	16.2559	16.018	16.3265	15.9121	16.2135	16.3671	16.3057	16.1237	16.3396
LOC653232	16.1237	16.3469	16.2269	16.2198	15.9812	16.2269	15.8544	16.1138	15.8544	16.2776	16.009	16.422	16.5063	16.1685	16.263	15.9472	16.0359	16.1536	15.9906	16.263	16.0614	16.1898	15.9472	15.9812	15.9545	16.5966	16.1306	16.0528	16.0445	16.2839	16.5319	15.9026	16.4605	16.0706	16.4545	16.1536	16.6615	16.422	16.1306	15.9812	16.2399	16.5187	15.9631	16.2923	16.0359	16.2051	16.088	16.009	16.1536
FTHL12	15.8144	15.7983	15.5906	15.6542	15.4078	15.6617	15.7907	15.887	15.9472	15.7983	16.0268	15.6617	15.6617	16.0359	16.2923	16.467	16.2198	16.2477	16.2051	16.2701	16.1448	15.7825	16.1048	15.7907	15.9727	15.6228	16.1237	15.8943	15.9472	15.7496	16.0445	16.2839	15.9812	15.7118	15.6228	15.9631	15.9906	16.1829	15.4985	16.009	15.6456	16.009	15.7425	15.9545	16.4605	15.7739	16.0268	15.9026	16.3131
LOC649946	16.4288	16.1967	16.3396	15.9812	16.088	16.0614	16.0968	16.2198	16.0445	16.2701	16.1048	15.7907	16.0528	16.1237	16.0268	16.018	16.1967	16.1306	16.0706	16.1829	16.0268	15.8306	16.088	15.9472	16.1382	16.1048	16.1048	16.0445	16.0359	15.9545	16.1306	16.0268	16.2839	16.1306	16.2701	15.8306	15.7354	16.009	16.3332	15.7203	16.2135	15.9812	16.08	16.0614	16.088	16.3941	16.2559	16.0445	16.3265
RPL17	16.2839	16.2399	16.1448	15.9991	15.921	15.9387	15.7587	15.9472	16.0268	16.4008	15.9026	15.8386	16.3469	16.0968	16.2839	15.9727	15.9991	16.1048	16.0359	16.2135	15.9545	16.5256	15.8386	15.9991	16.1138	16.3131	15.8943	16.1967	16.1048	16.4008	16.2331	15.8701	16.5966	15.9545	15.9906	16.1237	16.2994	16.2331	16.1967	15.8463	16.3869	16.2559	15.8784	16.3538	16.0268	16.2923	16.1536	16.1448	16.2923
CDKN2AIPNL	15.9727	15.887	15.7983	15.9545	15.9472	15.6299	15.7739	15.8463	15.7907	15.7354	15.9906	15.7587	16.2135	16.4153	16.1138	16.0359	16.1829	15.9298	16.0528	15.7983	16.1752	16.3265	16.1536	16.6334	16.1898	16.2269	16.088	15.9298	16.4347	15.7587	15.9121	16.2994	16.1448	15.9121	15.8064	15.9298	16.3538	15.4595	15.7425	16.422	15.7983	16.4153	16.3802	15.8463	15.2926	15.8222	15.2926	16.018	14.5504
RPSA	16.088	16.263	16.2839	16.3802	16.1967	16.3538	16.2051	16.3131	15.9991	16.4839	16.2701	16.3131	16.3671	16.2776	16.08	15.7118	15.9026	16.1138	16.1685	16.3332	15.8544	16.5319	16.0268	16.1536	16.2051	16.5256	16.3802	16.2051	16.0614	16.2994	16.4416	15.8222	16.1615	16.2269	15.9298	16.009	16.018	16.3131	16.4605	15.614	16.3606	15.7354	15.9727	15.8701	15.9545	16.2135	16.1382	16.1685	15.9631
LOC654194	16.1382	16.1752	16.3469	16.3131	16.1898	16.3869	16.3265	16.422	16.1752	16.3733	16.0968	16.1237	15.8463	15.7983	16.088	15.921	16.0445	16.2198	16.1752	16.2331	16.2269	15.887	16.1967	15.887	16.1752	15.9472	16.3195	15.8544	16.018	15.8386	15.9026	16.1615	16.5124	16.2776	16.0968	15.921	16.4416	16.2701	16.2399	15.8144	16.1237	16.2331	16.0445	15.6456	15.8943	15.9991	15.8306	16.0359	16.1685
MCART1	16.0614	15.921	15.7825	15.8463	15.9631	15.7587	15.8144	15.9812	15.8621	15.7203	15.8784	15.9298	15.9631	16.2051	15.8064	16.2135	16.2477	15.8701	16.088	15.8544	16.1237	16.066	16.1898	16.5187	16.3941	15.9298	16.1829	16.1237	16.263	15.7983	15.8386	16.2269	15.9387	15.7825	15.6542	15.9991	16.0268	15.5668	15.6694	16.4008	15.7496	16.1685	16.1829	15.8306	15.2357	15.6694	15.5513	15.887	15.0143
FTHL11	15.7983	15.6056	15.7496	15.4595	15.5668	15.7825	15.9812	15.7907	15.9727	15.7425	15.9631	15.6772	15.5756	15.8943	15.8504	16.1829	16.0528	15.8943	15.9631	15.8306	16.1138	15.6542	16.0614	15.6772	15.8463	15.4834	15.8701	15.7825	15.6456	15.8064	15.8544	16.1829	15.5756	15.7587	15.614	15.9545	15.7203	15.5906	15.4513	15.9545	15.5756	15.8784	15.9991	15.7983	16.3265	15.8544	15.9906	15.7668	16.2198
RPS3	15.9588	16.0614	16.263	16.2776	16.2477	16.3606	16.0445	16.2135	16.0359	16.3057	16.4288	16.009	16.2051	16.1536	15.8386	15.7983	15.8544	15.921	16.1536	16.1898	16.018	16.2399	16.08	16.1237	15.7825	16.0706	16.2198	16.2701	16.0268	16.08	16.2701	15.921	15.9727	16.2701	16.2198	15.8943	15.7279	16.1448	16.3265	15.4912	16.422	15.507	15.8463	16.0968	15.921	16.1752	16.1138	16.0968	16.1382
C21orf24	15.7668	15.716	15.5352	15.6694	15.9121	15.695	15.7354	15.7739	15.8943	15.4912	15.5668	15.5668	15.8784	16.009	16.0359	16.1138	16.1048	15.7739	15.9472	15.6299	16.08	15.9631	15.9631	16.5124	16.0706	15.8701	15.9812	15.7496	16.2477	15.695	15.6772	16.018	16.0268	15.6858	15.6056	15.6299	16.1752	15.5352	15.4912	16.263	15.6617	16.3396	15.9472	15.5833	15.6694	15.4754	15.3495	15.6383	14.7397
CD14	15.4513	15.6694	15.6617	15.6858	15.8621	15.7354	15.7425	15.3844	15.7203	15.2651	15.6858	16.3195	15.7118	14.9947	15.6056	16.088	15.6056	15.7425	15.5513	15.7587	15.3003	15.4595	15.7496	14.5658	15.3082	15.1871	15.3436	15.14	15.614	15.4912	15.5433	16.0528	15.6772	15.8621	16.2923	16.08	16.4605	16.088	15.6383	16.1967	15.6228	16.1615	15.6299	15.8064	15.7825	15.695	16.3538	15.5207	16.2701
LOC648622	16.1306	16.1306	16.2994	15.9727	15.9026	16.1752	15.8621	15.6383	16.088	16.2994	16.1306	16.0445	16.1752	16.0445	16.0614	15.8144	15.9121	16.1829	16.1138	16.1615	16.1048	16.2269	15.9298	15.9906	16.1685	16.3195	15.695	16.1382	15.8701	16.1048	16.3332	16.0614	15.8544	15.9026	15.9812	15.9472	15.9121	16.1615	16.2051	15.4295	16.3332	15.7496	16.0359	16.088	15.7945	16.0528	15.8701	16.1382	16.2477
RPL35A	15.9991	16.0706	16.1615	16.2331	16.0445	16.2776	16.1306	16.0445	15.9387	16.066	15.9727	15.6228	16.3265	15.9026	16.0528	15.8306	15.9472	16.0445	16.0268	16.3941	15.9026	16.263	16.0528	15.7038	16.0445	16.3332	15.9991	16.0706	15.887	16.2923	16.3396	15.7825	15.9472	16.1967	16.088	15.8064	16.2776	15.9727	16.1685	15.3495	16.1306	15.9727	15.9121	15.7668	15.4441	15.6056	15.4595	15.9545	15.6383
C9orf80	15.8463	15.6499	15.5983	15.6617	15.8222	15.5756	15.6383	15.7983	15.8306	15.6299	15.6617	15.5207	15.7354	15.9298	15.7203	15.9906	15.9727	15.7038	15.8784	15.7203	16.009	15.7425	15.8621	16.4474	16.08	15.7279	16.009	15.887	16.1752	15.6694	15.6542	15.9631	15.6383	15.6542	15.4366	15.8222	15.6299	15.4985	15.614	16.2198	15.614	15.887	16.1685	15.558	15.9727	15.5279	15.6694	15.7907	15.3082
RPL30	16.0968	16.1048	16.1829	16.0528	16.009	16.3671	16.0706	16.0706	16.1967	16.2559	16.088	15.8701	15.9121	15.9545	15.9906	15.9545	15.9631	16.0968	16.009	16.1138	15.8701	16.0528	16.018	15.8621	16.0268	15.9906	15.9472	16.1448	15.9298	15.8701	16.1237	15.9387	15.9026	16.1382	16.1138	15.9026	15.9472	15.9298	16.2923	15.5833	16.1967	15.7825	16.1138	15.7038	15.4754	15.7907	15.6383	15.9727	15.7279
LCP1	15.614	15.6772	15.5433	15.8544	15.8144	15.507	15.8306	15.7496	15.4912	15.6617	15.5756	16.0528	16.1382	15.2577	15.7279	15.695	15.6228	15.8264	15.4441	15.7118	15.507	15.7203	15.3495	15.1732	15.2232	15.6858	15.6694	15.1871	15.5833	15.5136	15.4912	15.9298	16.0968	15.8784	16.1237	16.0528	15.8544	16.2559	15.5279	16.3396	15.887	16.1048	15.7496	16.0359	15.7038	15.7587	15.7825	15.7983	16.3332
LOC388532	15.9812	15.9298	16.3606	16.1448	16.1685	16.1615	16.0268	16.0359	15.9812	16.1306	15.921	15.8306	15.8621	15.8144	15.887	15.9387	15.8701	15.9545	15.7983	15.9631	16.088	15.9991	16.0706	15.8784	15.9812	15.8784	15.9387	15.9631	15.9026	15.8463	15.7587	15.9906	15.8463	16.1685	15.8621	15.695	15.5513	15.6694	16.2477	15.5546	16.088	15.5352	16.1615	15.887	16.0445	16.088	15.8943	16.088	16.0528
FAU	15.9472	16.009	16.1138	16.088	16.1829	16.1967	15.9121	15.9121	16.1048	16.018	16.1829	16.0268	15.9812	16.0268	15.9298	15.8943	15.9812	15.9387	16.0614	16.0359	15.9472	15.7983	15.921	15.8144	16.0528	15.9545	15.8621	16.018	15.8621	15.8306	16.0706	15.9121	15.8621	16.2051	16.0528	15.9387	15.9387	15.9812	16.1448	15.6694	16.0445	15.7279	15.9387	15.7587	15.4834	16.0359	15.9026	15.9472	16.018
FCN1	15.6228	15.6499	15.1803	15.7279	15.6617	15.6858	15.6694	15.5207	15.7668	15.2295	15.3703	16.4347	15.8144	15.5136	15.7983	15.9631	15.8064	16.018	15.7668	15.6694	15.7983	15.1871	15.7354	14.7458	15.3436	15.0605	15.3003	14.9511	15.4665	15.887	15.7739	16.1685	15.7425	15.7668	15.8386	16.1138	15.7739	16.2135	15.6056	16.2776	15.7038	15.558	15.4595	15.5983	15.6858	15.6858	16.1448	15.7203	16.3538
LOC653658	16.1829	16.1685	16.0528	15.8386	15.7496	15.7907	15.5906	15.7587	16.018	16.1536	15.8661	15.7038	15.8544	15.887	15.9545	15.7587	15.8943	16.0706	15.8701	16.0528	15.8943	15.8222	15.7587	15.9121	15.9906	15.7496	15.8144	15.8742	16.0706	15.7354	15.8144	15.8621	16.2994	15.7739	15.7279	15.9121	15.9991	16.0968	16.0528	15.7587	16.1685	15.9545	15.7587	15.8386	15.8144	16.1536	15.8144	15.8784	16.088
MYL6	15.7038	15.5352	15.392	15.5833	15.6383	15.6694	15.614	15.507	15.3771	15.5833	15.7118	15.8144	15.4153	15.3436	15.4366	15.5833	15.2019	15.8386	15.5207	15.6228	15.4834	15.2357	15.5756	14.7956	15.2926	15.322	15.322	15.322	15.2651	15.4	15.614	15.5352	15.5668	15.7354	15.8463	15.7038	15.8144	15.8064	15.8701	16.3332	15.5207	15.9026	15.4222	15.8222	16.0706	15.921	15.9121	15.7425	16.1752
CCL5	15.8701	15.7354	15.4985	16.0445	16.2776	16.009	15.9342	15.9991	15.4366	15.9906	15.8661	15.4366	15.4513	15.9727	15.7739	15.8064	15.022	15.887	16.0445	16.2477	15.7668	15.3703	15.5352	15.322	14.8668	16.2135	16.2331	15.8306	15.092	15.4513	15.3558	15.4441	15.5433	16.4347	16.467	15.4985	16.1967	15.8943	15.7118	15.8621	15.6383	15.614	16.0706	16.3265	15.4912	16.1829	15.887	16.3131	16.3869
NACA	15.9906	16.0528	15.8306	15.7983	15.7587	15.9727	15.7496	15.8701	15.8144	15.7496	15.2295	15.7203	15.9026	15.5207	15.9631	15.7907	15.887	15.9121	15.7425	15.8144	15.8064	16.009	15.6617	15.3844	15.7354	16.009	15.6056	15.6617	15.8144	15.7668	15.9545	15.6858	16.088	15.6383	16.0445	15.887	16.2198	16.0706	15.695	15.9026	16.0528	16.3802	15.7279	16.1306	15.7668	15.9121	15.8544	15.8621	16.2559
RPL8	15.8306	16.0268	16.0359	15.8306	15.7203	15.8943	15.8386	15.9727	16.0968	16.0528	16.018	15.9812	16.0614	15.8621	15.8306	15.8784	15.9387	16.0614	16.0968	16.1048	15.8463	15.8784	15.7739	15.8701	15.8943	15.8463	15.9906	16.1615	15.8222	16.1306	15.7668	15.8144	16.2559	15.8144	16.3469	15.9906	15.8621	15.7587	15.8463	15.6772	16.0268	15.9472	16.0268	15.9387	15.7425	15.8943	15.8064	15.9812	15.9026
RPL12	16.0268	15.9387	16.088	15.7587	15.695	15.7668	15.5433	15.5513	15.9026	16.0359	16.1237	16.1306	16.084	15.9121	15.9387	15.7825	15.7496	16.0268	15.6994	15.8222	15.9906	16.1615	15.6228	15.7118	15.8621	16.3941	15.5756	15.9026	15.8386	16.2331	16.3733	15.614	15.8386	15.6617	16.1306	15.9812	16.08	16.08	16.2331	15.6542	16.1048	16.0706	15.8144	16.1382	15.8784	16.2559	15.7354	15.8064	16.0968
RPS18	16.0528	15.9812	16.1967	16.2701	16.08	16.1306	15.9727	15.8943	16.0706	16.1048	15.9298	15.7118	15.9727	15.9472	15.9121	15.8544	15.8463	16.009	15.5833	15.9387	15.7496	15.921	15.9387	15.4153	15.7425	16.2559	15.8064	15.9545	15.9727	15.7279	15.9727	15.8463	16.009	16.1048	15.8544	15.7496	16.009	16.0614	16.2701	15.5136	15.9812	16.0268	16.1048	15.7425	15.887	16.0968	15.921	16.0268	15.6858
JUND	16.1967	15.8943	15.887	15.8943	15.9298	16.5569	16.4545	16.6113	16.59	16.3396	16.4153	16.3702	16.4638	16.6404	16.9263	16.8673	17.0742	16.8476	16.7188	16.9727	16.5569	16.9838	16.6334	16.6404	16.9535	16.7366	16.772	16.467	16.4288	16.6851	16.6113	15.9545	16.2399	16.0528	16.1752	16.1382	16.5444	15.9991	15.3436	15.2577	16.0706	16.2994	16.0614	15.614	16.1615	15.5433	15.4513	14.9947	15.5433
RPL23	16.1048	15.7587	15.9991	15.9026	15.8544	15.9545	15.8222	16.009	15.887	15.9472	16.0359	15.507	15.4754	15.7907	15.7668	15.8701	15.921	15.7354	15.8544	15.921	15.8144	15.6056	15.9121	15.6858	15.9121	15.6056	15.8544	15.8621	15.8943	15.5668	15.6858	15.8943	16.1536	15.8064	15.4834	15.5756	15.5279	16.1048	15.9298	15.8386	15.9387	15.7739	15.8621	15.6858	15.9298	16.0268	15.9387	15.7279	16.2776
LOC285053	15.9298	15.9727	16.1382	15.9121	15.8064	15.8222	15.7203	15.5352	15.9121	15.9387	15.9472	15.887	15.9472	16.018	15.7587	15.6772	15.7118	15.695	15.8463	15.8784	15.9631	15.7279	15.7425	15.8544	15.921	15.7668	15.4366	16.08	15.7354	15.9727	15.887	15.7279	15.7496	15.9342	15.7118	15.7587	15.6456	15.9631	16.1048	15.4665	15.9121	15.8144	15.921	15.9812	16.08	16.2198	16.0706	16.1615	16.1237
LOC731640	15.887	15.8064	16.1898	15.9298	16.1237	16.0359	15.9991	15.921	15.9545	15.921	15.9812	15.5906	15.5207	15.8064	15.9727	15.7739	15.8306	15.7587	15.887	15.9026	15.9387	15.6383	15.9545	15.7354	15.9387	15.558	15.8306	15.8463	15.7983	15.558	15.6694	15.7907	15.8064	15.9812	15.5433	15.6542	15.2501	15.6542	16.0445	15.4754	15.8701	15.4665	15.8306	15.6228	15.8544	15.8701	15.8621	15.9298	15.9906
UBB	15.5668	15.5279	15.6228	15.614	15.6772	15.5833	15.4513	15.4513	15.5906	15.6772	15.9387	15.6694	15.6542	15.7354	15.5756	15.6858	15.092	15.5279	15.4834	15.6456	15.7907	15.3082	15.5433	15.2718	15.3844	15.8064	15.4985	15.5352	15.4222	15.6228	15.5207	15.322	15.2357	15.695	15.507	15.8463	15.322	15.614	15.6456	15.4513	15.6858	15.2819	15.6228	15.7825	16.79	15.9026	15.9631	15.5513	15.8386
LOC642250	15.9588	15.9026	15.921	15.8701	15.7825	15.921	15.8784	15.8222	16.0528	16.0268	15.7279	16.0614	16.018	15.9631	15.8701	15.7425	15.5833	15.8144	15.9026	15.8386	15.921	15.8386	15.8784	15.7739	16.0359	15.9991	15.8222	15.9472	15.7496	15.921	15.8943	15.7983	15.6456	15.8463	15.921	15.7825	15.7668	16.0359	16.009	15.3363	15.9727	15.7038	15.8222	15.9026	15.8701	16.0706	15.7983	15.8264	15.921
LILRB1	15.7425	15.4754	15.5513	15.7354	15.6228	15.5207	15.6617	15.5983	15.7038	15.4985	15.6056	15.5513	15.392	15.7587	15.5352	15.7354	15.7279	15.642	15.6617	15.6617	15.8306	15.5027	15.8544	16.1829	15.8701	15.4366	15.8386	15.7907	15.8064	15.5433	15.4985	15.8386	15.4078	15.6456	15.3703	15.7668	15.3003	15.1803	15.5906	16.0968	15.5906	15.4222	15.9298	15.5513	15.9991	15.6383	15.6299	15.6617	15.4665
C10orf58	15.8222	15.6228	15.7038	15.7425	15.6694	15.5279	15.6772	15.5756	15.8386	15.614	15.5207	15.4665	15.2849	15.6617	15.5136	16.009	15.5513	15.6694	15.7354	15.4912	16.0445	15.1268	15.8463	15.8064	15.8064	15.022	15.7203	15.6456	15.7668	15.2926	15.1588	16.0445	15.4513	15.5433	15.2849	15.7425	14.7885	15.5513	15.7496	16.018	15.4078	15.1588	15.9906	15.392	16.009	15.6542	15.8386	15.8144	15.9298
RPS2	15.7739	15.695	15.9906	16.1306	15.9991	16.2839	16.088	16.088	15.9298	15.7587	15.9121	15.8544	15.6299	15.8386	15.6299	15.6299	15.5433	15.6858	15.9387	15.8463	15.9727	15.5207	16.0445	15.507	15.8544	15.7203	15.7354	16.1048	15.6056	15.8621	15.9472	15.7587	15.7118	16.018	15.8701	15.6456	15.558	15.8144	15.887	15.152	15.8144	15.0636	15.9026	15.7739	15.7496	16.1237	15.9298	15.9991	15.9545
ZNF430	15.9026	15.5433	15.6299	15.6772	15.7279	15.4366	15.7038	15.7118	15.8463	15.5136	15.6383	15.2577	15.5668	15.8784	15.6617	15.9812	15.6299	15.6299	15.8144	15.6383	15.8784	15.6228	15.7825	16.2776	16.0968	15.4153	15.921	15.6858	15.9545	15.3844	15.2926	15.887	15.5513	15.614	15.2614	15.6383	15.3844	15.3495	15.5833	16.088	15.4912	15.4985	16.1237	15.4912	15.9026	15.507	15.5983	15.6772	15.0012
ATP5EP2	15.695	15.7038	15.695	15.7038	15.7118	15.5906	15.695	15.4441	15.6772	15.695	15.507	16.1615	15.8943	15.4834	15.5906	15.5983	15.3771	15.6617	15.4912	15.5279	15.5513	15.5906	15.4513	15.2088	15.392	15.695	15.3625	15.7118	15.4985	15.8144	15.9298	15.6299	15.6299	15.6299	15.6694	15.8784	15.8943	15.6228	15.8064	15.6858	15.7668	15.6456	15.7203	15.8943	15.8064	15.8144	15.7203	15.8264	15.8701
COX4I1	15.7279	15.7907	15.8943	15.8621	16.018	15.887	15.7983	15.7203	15.5433	15.8222	15.8386	15.5433	15.558	15.6299	15.558	15.5433	15.6858	15.8463	15.8064	15.7496	15.7203	15.5668	15.887	15.3703	15.5207	15.7425	15.7739	15.695	15.5207	15.7907	15.5833	15.8784	15.5136	15.921	15.7668	15.7907	15.7038	15.8222	15.8222	15.7354	15.7118	15.2651	15.7668	15.7907	15.7945	15.9545	16.018	15.7038	16.1138
DAPP1	15.6858	15.4834	15.6456	15.6228	15.7668	15.3771	15.5352	15.6858	15.7425	15.4366	15.5906	15.4222	15.4834	15.695	15.4834	15.6383	15.7203	15.5207	15.6994	15.5756	15.887	15.3558	15.7118	16.088	16.009	15.5136	15.887	15.6694	15.8463	15.3153	15.2718	15.8544	15.3625	15.6056	15.4595	15.5513	15.1732	15.2501	15.5136	16.0706	15.4595	15.4595	15.9545	15.5433	15.8386	15.5906	15.5668	15.6694	15.3625
RPLP0	15.8064	15.9472	15.9631	16.018	15.7038	15.7496	15.6056	15.7825	15.6299	15.9727	15.8943	16.088	15.9906	15.921	15.695	15.4754	15.6772	15.8064	15.7825	15.8701	15.5833	16.0968	15.5833	15.3625	15.614	16.4347	15.7496	15.921	15.7203	16.088	16.2923	15.3771	16.2776	15.7203	16.0268	15.6772	16.1829	16.2269	15.921	15.4595	16.0614	15.9298	15.6617	15.6772	15.558	15.7668	15.7425	16.1048	16.009
LOC644029	15.8386	15.8701	15.9812	15.9387	15.7907	15.8386	15.7668	15.8064	15.9906	16.0445	15.7739	16.0706	16.1138	15.9991	15.8504	15.5906	15.507	15.8784	15.7907	15.8064	15.7739	16.3396	15.6694	15.7825	15.7739	16.2331	15.7983	15.8386	15.7825	15.9387	16.1615	15.392	15.7907	15.9472	15.9631	15.8621	15.9727	15.9545	15.9545	15.6617	15.9298	15.7118	15.507	16.0528	15.7354	16.018	15.7668	15.8701	16.0614
RPL10A	16.009	16.018	15.9387	16.0614	15.9545	16.0528	15.9472	15.8386	15.9631	16.1615	15.8306	15.7983	15.921	15.8463	15.9472	15.6228	15.7354	15.9812	15.8943	16.009	15.9298	16.0268	16.009	15.6694	15.8306	16.0968	15.7825	15.9727	15.5352	15.7118	15.7203	15.9472	16.1967	15.8701	15.9387	15.7354	15.7983	16.018	15.8386	15.507	16.1536	15.695	15.8701	15.7354	15.6772	15.8784	15.7279	15.695	15.7739
DUSP1	15.7587	15.5983	15.3003	15.4295	15.4834	16.2477	16.1752	16.2839	16.3802	16.2477	15.8463	16.9535	16.6547	16.4739	16.6547	16.5634	16.5256	16.3396	16.2477	16.7808	16.3396	17.1057	16.3195	15.9387	16.1615	16.5187	16.1615	16.2559	16.2923	16.6113	16.5444	16.088	16.2477	15.7907	16.3057	16.1752	16.5124	16.1536	14.4738	15.8306	15.921	16.6851	14.8444	16.5124	15.5136	15.614	15.6456	15.022	15.6299
TOMM7	16.018	15.9991	15.7739	15.5352	15.6542	15.7983	15.887	15.614	15.8222	16.1138	15.7668	15.6858	16.1685	15.9387	15.7907	15.6617	15.4834	15.6228	15.9298	15.9298	15.5668	15.8701	15.3844	15.4078	15.8222	16.422	15.5668	15.7587	15.7907	15.7739	16.1967	15.7496	16.0528	15.6694	15.7587	15.5983	16.1344	15.7496	16.0706	15.0337	15.8784	16.0528	15.4665	15.9906	15.6228	15.7825	15.6228	15.921	15.6456
LOC440926	15.3003	15.5136	15.1461	15.4513	15.2651	15.0726	15.1268	14.9444	15.2718	15.1732	15.322	15.7425	15.5906	15.1588	15.3771	15.3844	15.0107	15.3363	15.3703	15.4078	15.0284	15.5027	15.2088	14.5352	15.1125	15.5833	15.2019	15.022	15.0605	15.4295	15.5983	15.4912	15.3082	15.4	15.7907	15.7203	16.4288	15.6299	15.3082	16.1685	15.2788	16.088	15.2436	16.1615	15.8306	15.3844	15.6617	15.6858	15.6056
Septin 9	15.6694	15.8544	15.8544	15.921	15.8386	15.9121	15.6299	15.8144	15.6858	15.8621	15.887	15.8784	15.8701	15.5756	15.7825	15.4665	15.6383	15.8621	15.6772	15.6056	15.6772	15.6299	15.695	15.5352	15.5668	15.9026	15.7425	15.6772	15.507	15.4665	15.7496	15.695	15.7038	15.9991	15.887	15.8144	15.5136	15.8306	15.6299	15.7425	15.8306	15.322	15.6456	15.5668	15.5906	15.7983	15.7038	15.7825	15.8621
RPL24	15.7118	15.8621	15.8784	15.8222	15.8784	15.9812	15.7825	15.8784	15.6694	15.8701	15.614	15.9631	16.0445	15.7203	15.8222	15.5207	15.8386	15.6542	15.8222	15.8943	15.6383	15.9472	15.7983	15.4295	15.695	16.1536	16.0445	16.009	15.4153	15.9298	16.2839	15.6617	15.9631	15.8306	15.9727	15.6056	15.7907	15.7739	15.8144	15.3703	15.9631	15.8064	15.6815	15.9298	15.5433	15.6772	15.5906	15.6456	15.7907
RPS5	15.8621	15.7739	16.2135	16.0359	15.8701	15.7118	15.6456	15.9026	15.921	15.9545	16.0445	15.9121	15.9298	15.7496	15.8784	15.3436	15.7739	15.7279	15.7496	15.9545	15.6299	15.9812	15.4153	15.7668	15.9298	15.9812	15.4222	15.9121	15.7118	15.9121	15.8306	15.4754	16.2269	15.7425	15.5756	15.558	15.6228	15.7279	16.2994	15.3436	16.1829	15.6542	15.7118	15.695	15.695	16.0445	16.0528	15.8943	15.7587
MCM8	15.7496	15.5906	15.558	15.5983	15.5513	15.322	15.6228	15.6772	15.5983	15.5207	15.3625	15.2926	15.2926	15.6694	15.4295	15.8386	15.7825	15.4078	15.6228	15.3495	15.7279	15.4	15.7668	16.2477	15.9472	15.4078	15.9298	15.7668	15.7739	15.3363	15.2436	15.6456	15.4985	15.4366	15.1944	15.7118	15.2232	15.0989	15.322	16.1615	15.4665	15.4441	15.8544	15.322	15.5668	15.1944	15.4665	15.507	14.6859
XPNPEP3	15.4985	15.558	15.3625	15.3003	15.4513	15.4078	15.4153	15.695	15.5833	15.3625	15.4595	15.1196	15.3703	15.8544	15.8144	15.8222	15.8621	15.614	15.5906	15.4985	15.7118	15.4754	15.614	16.2331	15.9631	15.2577	15.5513	15.4754	15.8544	14.9757	15.1125	15.9727	15.8306	15.4985	15.0989	15.5136	16.2269	15.1064	15.1803	16.08	15.6772	16.1898	15.8943	15.2169	15.392	15.3291	15.0406	15.2788	14.4269
SRGN	15.2577	15.6858	15.2019	15.0857	14.9947	15.2849	15.5136	15.3558	15.8701	15.4513	15.5136	16.018	15.322	15.6858	15.9812	15.4912	15.3003	15.4222	15.7203	15.5983	15.5433	15.8544	15.6056	14.7885	15.2651	15.3844	15.5906	15.2357	15.6299	15.8784	15.695	15.4834	15.5207	15.3291	15.8784	16.0268	16.3195	15.921	15.1732	15.6228	15.3436	15.7587	15.2788	15.7203	16.1752	15.558	15.8463	15.3703	15.9472
NLRP8	15.7354	15.3153	15.4912	15.3844	15.6299	15.2128	15.5833	15.6694	15.5513	15.3495	15.558	15.4754	15.7425	15.8701	15.6858	15.9121	15.9298	15.5668	15.7279	15.614	15.8386	16.08	15.7279	16.5063	16.018	15.8386	15.9026	15.614	16.1237	15.5207	15.322	15.8306	15.6617	15.4513	15.5906	15.4665	15.8222	15.079	15.2577	16.0268	15.3153	15.921	16.1382	15.4665	15.022	15.1871	15.079	15.5833	14.4954
TSPO	15.152	15.4665	15.3363	15.5906	15.7354	15.6056	15.4	15.2651	15.1871	15.3558	15.6228	15.8943	15.5833	15.152	15.322	15.2169	14.9821	15.3495	15.0284	15.092	15.4665	15.3625	15.7907	14.5704	15.0071	15.0857	15.2788	15.079	15.3291	15.6456	15.558	15.6542	15.2436	15.7279	15.7739	15.6858	15.5207	15.507	15.5207	16.1536	15.3703	15.5279	15.4912	15.7279	15.4985	15.7203	16.0359	15.4665	16.1306
HLA-DRA	15.4912	15.5833	15.0605	15.5207	15.3703	15.1803	15.0989	15.9631	15.614	15.7038	14.8764	16.1415	16.0268	15.2651	15.3703	15.614	15.5756	15.7496	15.5433	15.8621	15.1588	15.614	15.4366	15.2232	15.4153	15.6772	15.7668	15.5513	15.5279	16.0968	16.018	15.5207	15.3703	15.4295	15.8306	16.0968	16.2923	15.7203	15.2169	15.9387	15.5983	16.2198	15.3771	16.2399	15.6056	15.8386	15.6056	15.1944	16.1898
HLA-B	15.507	15.6617	15.507	15.5513	15.6056	15.6772	14.896	15.4985	15.3363	15.6694	15.7425	16.3469	15.5136	15.7425	15.5513	15.2088	15.1695	15.642	15.092	15.7425	15.3363	15.6858	15.2169	15.5983	15.4985	15.5207	15.6383	15.6383	15.3771	15.6772	15.5352	15.1803	15.4665	15.8386	15.7038	15.9727	16.1448	15.7907	15.4222	15.5433	15.4985	15.5433	15.3003	15.921	15.6617	15.7038	15.5279	15.6542	16.2399
NPC2	15.3495	15.507	15.3495	15.5433	15.5207	15.4985	15.1944	15.4078	15.5136	15.3771	15.2651	15.9991	15.7825	15.0666	15.2718	15.4595	15.392	15.7118	15.3082	15.1871	15.3625	15.4441	15.4912	14.896	15.1196	15.3003	15.392	15.0605	15.3003	15.5352	15.7279	15.6228	15.2577	15.3844	15.695	15.8386	15.7425	15.5136	15.3625	15.8943	15.5513	15.5668	15.5352	15.8784	15.5513	15.7279	15.5433	15.2577	16.1615
GLTSCR2	15.6299	15.7825	16.0968	16.0706	15.9387	15.9298	15.8463	15.9906	15.6542	15.7739	15.8144	15.6456	15.7739	15.7038	15.7038	15.5756	15.7983	15.7825	15.921	15.7907	15.8621	15.8064	15.8064	15.5833	15.7496	15.8544	15.7279	15.8222	15.4834	15.5906	15.7907	15.7118	15.8222	15.9906	15.9026	15.4	15.4754	15.7118	15.7983	15.1659	15.8222	15.3844	15.7983	15.6617	15.6383	15.8064	15.4754	15.8544	15.5207
TYROBP	15.3082	15.5668	15.0758	15.2577	15.5279	15.2295	15.2357	14.7458	15.4295	15.0857	15.5279	15.7496	15.3436	15.0437	15.6542	15.6694	15.2577	15.5352	15.507	15.3153	15.6542	15.022	15.3625	14.4647	15.1588	14.657	14.9757	15.3291	15.3703	15.5513	15.6617	15.7203	15.1871	15.4665	15.7496	15.5833	15.8701	15.6858	15.2718	15.7739	15.1196	15.4834	15.3082	15.5207	15.6542	15.5983	15.9727	15.1732	15.8943
LOC653773	15.9121	15.7496	15.8064	15.4834	15.3844	15.3436	15.4985	15.7668	15.7496	15.8943	15.7587	15.322	15.4222	15.6383	15.8621	15.4985	15.8784	15.8264	15.7118	15.7825	15.7038	15.322	15.5207	15.5756	15.5833	15.5513	15.5207	15.7279	15.7587	15.4222	15.3436	15.4595	16.1382	15.5668	15.1268	15.5352	15.6542	15.8463	15.7907	15.3153	15.9545	15.6617	15.5136	15.152	15.5983	15.8306	15.7739	15.7118	15.695
LOC388654	15.7907	15.8144	15.8701	15.9472	15.5906	15.5668	15.5668	15.8306	15.7587	15.9298	15.8222	15.921	16.1448	15.8306	15.6456	15.3291	15.4595	15.7203	15.6299	15.6858	15.4595	15.8144	15.322	15.392	15.5352	16.2198	15.8784	15.7203	15.7279	16.0359	16.1048	15.2169	16.2701	15.8544	15.9545	15.6694	15.8784	15.6056	16.1237	15.0857	16.1898	15.5906	15.4754	15.8544	15.7739	16.08	15.7907	15.7739	15.7038
LOC399900	15.5279	15.4912	15.092	15.1732	15.5833	15.3003	15.322	15.6299	15.322	15.1871	15.2019	15.5352	15.7203	15.7668	15.7425	15.9298	15.7587	15.5906	15.6542	15.5352	15.7587	16.2198	15.7203	16.2923	15.9026	15.9121	15.6542	15.5279	16.1138	15.5279	15.4295	15.6383	15.7354	15.3625	15.5668	15.3771	16.422	15.1588	15.14	15.9298	15.2357	15.9906	15.6994	15.3363	14.9947	15.0012	14.8269	15.1659	14.0813
FKSG30	15.0666	15.4222	14.9316	15.1944	15.1268	14.8326	14.9757	15.0012	15.4834	15.4665	15.3153	15.7739	15.3082	15.3153	14.8639	15.2849	14.9071	15.1268	15.022	15.14	15.079	14.9071	14.727	14.5808	14.8509	15.1125	14.8639	15.3703	15.2088	15.4595	15.6383	15.3558	15.092	15.3465	15.4441	16.0359	15.6772	15.6617	15.0542	16.1829	15.1803	15.3771	15.2088	15.9472	15.7587	15.7354	15.8222	15.5756	16.0445
SPTLC1	15.6456	15.3436	15.3703	15.3495	15.4441	15.1064	15.507	15.6456	15.5279	15.4	15.392	15.152	15.4366	15.6772	15.4754	15.7203	15.8144	15.4754	15.6056	15.5136	15.6858	15.5352	15.6383	16.3265	15.8386	15.5668	15.7038	15.5207	15.9631	15.2788	15.4153	15.9812	15.6694	15.2501	15.3495	15.4078	15.4366	15.0284	15.3153	16.0445	15.3363	15.7203	15.6383	15.4595	15.0542	15.4078	15.092	15.2926	14.8203
RPL5	15.5983	15.7668	16.0268	15.7739	15.7983	15.8784	15.8064	15.7354	15.7983	15.8544	15.5352	15.6383	15.7038	15.7739	15.7496	15.5279	15.4513	15.5756	15.5136	15.7739	15.7425	15.558	15.8306	15.6383	15.6617	15.7354	15.5983	15.5833	15.5756	15.6383	15.3703	15.558	15.7203	15.887	15.6858	15.4834	15.3625	15.5983	15.9472	15.2651	15.9472	15.4754	15.5433	15.6056	15.7279	15.7496	15.7496	15.7354	15.7425
RPS13	15.8784	15.8306	15.7668	15.3703	15.4912	15.6542	15.5756	15.6228	15.7739	15.8306	15.5433	15.3363	15.695	15.6228	15.6772	15.4441	15.6542	15.4912	15.5279	15.5906	15.6056	15.7118	15.5668	15.6056	15.6299	15.887	15.3291	15.8144	15.4	15.7425	15.8621	15.5983	15.921	15.5756	15.7825	15.5279	15.614	15.8386	15.7279	15.1064	15.9026	15.6228	15.5906	15.4153	15.3436	15.5136	15.2436	15.4513	15.8144
PFDN5	15.7825	15.7425	15.4366	15.4078	15.4295	15.5513	15.3703	15.5906	15.7118	15.5983	15.5983	15.4078	15.5279	15.2788	15.7354	15.507	15.5668	15.5983	15.4222	15.5668	15.2849	15.3291	15.3153	15.1461	15.5433	15.3703	15.3558	15.4366	15.4912	15.4985	15.4834	15.2788	16.018	15.4441	15.4295	15.5433	15.6694	15.8621	15.5513	15.5279	15.6056	15.7983	15.2926	15.3844	15.3495	15.6228	15.614	15.558	15.8544
AHR	15.4754	15.2295	15.2577	15.4153	15.3771	15.2128	15.4595	15.4	15.3625	15.2169	15.2088	15.3703	15.2169	15.4754	15.14	15.5513	15.4078	15.2232	15.3625	15.2019	15.5279	15.5433	15.5279	16.0528	15.7907	15.507	15.614	15.5906	15.6694	15.3625	15.4595	15.6694	15.0071	15.322	15.0666	15.4366	14.964	14.8838	15.2295	15.8784	15.2436	15.1268	15.8064	15.4754	15.6299	15.2788	15.2577	15.4078	14.9125
PSMD12	15.5136	15.3703	15.2788	15.322	15.4	15.1461	15.3844	15.5136	15.5207	15.5433	15.4985	15.14	14.896	15.614	15.507	15.5668	15.558	15.3082	15.6858	15.3625	15.8222	15.4153	15.4985	16.0359	15.7587	15.1944	15.5433	15.5983	15.6617	15.2088	15.1431	15.8064	15.2019	15.3153	15.0468	15.3363	15.2788	15.0337	15.3003	15.921	15.2718	15.2819	15.8386	14.8576	15.14	15.2357	14.9947	15.5906	14.6026
ATP6V0C	15.0337	15.2651	15.3771	15.4366	15.4665	15.4754	15.4441	15.2088	15.2577	15.2436	15.6694	15.7354	15.3558	15.2718	15.4441	15.7038	15.2357	15.4	15.3771	15.392	15.6228	15.5279	15.4754	15.0468	15.0857	14.9371	15.4078	15.2718	15.2501	15.4078	15.4513	15.5279	14.9018	15.4078	15.5352	15.4754	15.4985	15.2088	15.1125	15.2295	14.9316	15.2577	15.4	15.3465	16.0968	15.3436	15.558	15.3495	15.4834
LOC651436	15.5756	15.7279	15.9472	15.8144	15.4754	15.8463	15.6858	15.6542	15.8064	15.9631	15.7203	15.7825	15.7907	15.7279	15.6228	15.2788	15.3844	15.5433	15.4985	15.5833	15.5756	15.7496	15.5983	15.4366	15.7279	15.921	15.5279	15.6542	15.5513	15.7038	15.7983	15.3153	15.7825	15.6772	15.6383	15.614	15.1196	15.7825	16.0359	15.079	15.8463	15.4912	15.4153	15.6299	15.4078	15.6456	15.4985	15.7587	15.5983
RPS24	15.7203	15.2169	15.8463	15.4912	15.5983	15.6456	15.1588	15.4153	15.6056	15.4595	15.5833	15.392	15.1659	15.4912	15.5833	15.4513	15.5136	15.3436	15.8306	15.2088	15.6456	15.0605	15.4665	15.4441	15.3291	15.2849	15.5352	15.3625	15.2753	15.1944	15.1944	15.2718	15.3807	15.5279	15.2088	15.5207	15.0468	15.5207	15.7825	15.2357	15.7203	15.2357	15.152	15.4513	15.6456	15.7118	15.6772	15.5136	15.6772
DMC1	15.4665	15.322	15.152	15.1461	15.6456	15.0468	15.3082	15.5833	15.392	15.1332	15.2819	14.9572	15.2501	15.6542	15.5433	15.7279	15.7425	15.392	15.4513	15.4441	15.7825	15.4912	15.4222	16.2839	15.7668	15.2295	15.7118	15.5136	15.8784	15.322	15.0337	15.7354	15.614	15.2295	15.0284	15.3844	15.4595	15.0143	15.1196	15.887	15.079	15.6694	15.5668	15.1944	14.9572	14.9511	14.9316	15.1871	14.4647
SDHALP1	15.3844	15.3363	15.4	15.5279	15.392	15.1196	15.4754	15.2788	15.2357	15.2849	15.3771	15.614	15.3625	15.4	15.0666	15.4153	15.2849	15.2088	15.3558	14.8838	15.3771	15.4834	15.4834	16.0268	15.4912	15.4754	15.558	15.4985	15.558	15.3558	15.2232	15.7425	14.9316	15.2926	15.5279	15.4153	15.1461	14.6124	15.092	15.8064	15.2088	15.5983	15.7825	15.1659	15.3003	15.2295	15.3771	15.3291	14.3815
HLA-H	15.4834	15.6383	15.5136	15.5136	15.614	15.614	15.2788	15.2357	15.2651	15.6542	15.6542	15.8463	15.1461	15.5668	15.3291	15.2295	15.1944	15.4366	15.2926	15.3558	15.3558	15.392	15.0542	15.4754	15.4665	15.0337	15.4665	15.4441	15.0012	15.6617	15.4	15.3082	15.3003	15.5906	15.7203	15.8701	15.6383	15.3844	15.392	15.5756	15.4513	15.0071	15.7354	15.6694	15.1125	15.5513	15.392	15.5668	15.9387
LOC441246	15.6056	15.614	15.9121	15.5668	15.5433	15.7739	15.4834	15.1659	15.695	15.8386	15.7825	15.3495	15.5352	15.6456	15.4078	15.3187	15.4665	15.6772	15.6456	15.7038	15.4	15.5513	15.3082	15.6228	15.6383	15.6299	15.2651	15.7425	15.4513	15.5983	15.5279	15.3363	15.4222	15.7983	15.4153	15.4441	15.3153	15.558	15.9727	15.0071	15.7354	15.14	15.6815	15.5136	15.4513	15.9472	15.6858	15.6299	15.8064
ANKRD30B	15.2436	15.152	15.1871	15.3625	15.3003	15.1125	15.2539	15.392	15.4513	15.2232	15.2357	15.3153	15.4985	15.5352	15.152	15.6056	15.4912	15.2718	15.4	15.2295	15.4754	15.6456	15.4595	16.0614	15.7118	15.3625	15.7587	15.507	15.5136	15.3003	15.2295	15.5136	15.0726	15.2788	15.2436	15.4513	15.0666	14.9572	15.1623	15.695	15.152	15.4513	15.6994	15.4295	15.5207	15.2577	15.322	15.3363	14.9511
RPS9	15.3363	15.1232	15.8144	15.6383	15.5756	15.5136	15.558	15.3291	15.3703	15.507	15.8544	15.5833	15.4	15.4441	15.2926	15.3495	15.4754	15.7668	15.6383	15.2788	15.5906	15.2295	15.5906	15.0337	15.4441	15.3153	15.2926	15.5756	15.3436	15.6056	15.3844	15.3003	15.3436	15.5983	15.3153	15.4222	14.8764	15.4295	15.8784	15.0468	15.558	14.7092	15.7739	14.7763	15.2232	15.6299	15.5352	15.7496	15.4912
LOC220433	15.9387	15.2926	15.6694	15.6299	15.5136	15.6383	15.6542	15.5433	15.7825	15.8144	15.695	15.1064	15.2651	15.4665	15.5279	15.4222	15.695	15.558	15.5756	15.6772	15.4985	15.3771	15.6456	15.4513	15.6456	15.3082	15.5833	15.6056	15.392	15.1332	14.988	15.5906	15.4441	15.2357	15.0406	15.079	14.7763	15.3363	15.7203	15.2501	15.7587	15.2232	15.4985	15.0726	15.2849	15.5833	15.3003	15.6228	15.392
RPL21	15.5207	15.5207	15.9727	16.1685	16.0706	16.3265	16.2477	16.3941	15.3436	15.7279	15.6772	15.2019	15.0726	15.2088	15.5983	15.1803	15.4366	15.5136	15.392	15.5207	15.5352	15.152	16.2399	15.0726	15.4754	15.1196	16.2477	15.5668	15.2295	15.5833	15.6456	15.6772	15.695	16.1898	15.6617	14.9699	15.0605	15.3771	15.7587	14.8838	15.5136	14.9018	15.6542	15.1125	15.1837	15.3625	15.1588	15.614	15.614
VIM	14.919	15.1588	14.9821	15.2295	14.9821	15.1732	14.9821	15.2436	15.4153	15.1461	15.4153	15.4912	15.8222	15.3844	15.4912	15.4	15.4	15.5513	15.2849	15.4754	14.9821	15.695	15.4295	14.6679	15.0406	15.1588	15.4513	15.2019	15.3844	15.7825	15.7425	15.4985	15.4754	15.0726	15.6456	15.7279	16.1576	15.5433	15.2357	15.3625	15.2501	16.1306	15.1268	15.4	15.507	15.022	15.4295	15.2501	15.6617
C8orf37	15.2651	15.14	15.4153	15.2357	15.4366	15.1332	15.3003	15.2539	15.4078	15.0989	15.3363	15.1732	15.1803	15.507	15.2501	15.5352	15.4153	15.152	15.4665	15.0337	15.5983	15.3495	15.2849	16.0445	15.7038	15.2718	15.507	15.4295	15.7425	15.2651	15.3003	15.3844	15.2651	15.2577	15.0071	15.2232	15.0012	14.964	15.3771	15.7825	14.8764	15.1332	15.5756	15.079	15.4222	15.1803	15.1803	15.4912	14.8509
AMY1C	14.7337	15.0605	14.6978	15.3363	15.2357	15.0542	15.1064	15.3495	15.1803	15.3003	14.8132	15.4153	15.4295	15.0605	15.4	15.2577	15.0726	14.8905	15.2651	15.2651	15.0666	15.1944	14.9511	14.9371	14.5204	15.6694	15.2577	15.0143	15.1125	15.3495	15.3291	15.2357	15.2169	15.1732	15.4754	15.507	15.3558	15.5833	15.0989	15.7907	15.3495	15.6858	14.8326	15.2295	15.3625	14.9821	15.5207	15.1332	15.887
FAM115A	15.4	15.1871	15.0758	15.1871	15.3082	14.9699	15.4078	15.1554	15.3003	15.2019	15.0726	14.9821	14.8269	15.5433	15.2436	15.9026	15.4295	15.4595	15.558	15.3291	15.4441	15.2651	15.3558	15.8306	15.8784	15.0542	15.5136	15.4912	15.5433	15.1196	15.1064	15.4665	15.322	15.3703	14.8384	15.6228	15.0857	15.1125	15.1461	15.7279	15.2651	15.0726	15.3291	14.8384	15.2169	15.0406	15.1125	15.1803	14.9371
LOC653086	15.3771	15.1732	15.4295	15.3436	15.322	15.2436	15.5983	15.1871	15.2788	15.152	15.2501	15.1871	14.9947	15.3363	15.0372	15.2436	15.1588	15.4665	15.1588	15.0468	15.4078	15.0468	15.5513	15.7587	15.5756	15.1268	15.4153	15.2849	15.4078	15.0468	15.0857	15.507	14.9444	15.4222	15.2295	15.2926	14.6352	14.4738	15.1871	15.4441	15.1659	15.0406	15.5833	15.1732	15.3363	15.4222	15.1659	15.2849	14.8326
LOC650646	15.6542	16.4153	15.7907	15.8784	16.3131	16.08	16.57	16.4347	13.893	14.024	16.2994	14.1219	15.9991	15.7825	15.8943	16.1306	16.2701	15.9026	15.8621	14.0114	15.7354	16.677	16.2269	15.7496	13.8392	14.3168	15.8463	16.4739	16.1306	16.5634	16.1898	13.7412	15.7983	15.8222	16.5124	15.6617	14.1709	16.487	16.1536	13.5824	15.8386	15.8621	15.6056	16.2994	16.2477	14.1753	16.2994	16.1829	14.377
LOC648000	15.6383	15.8222	15.4665	15.392	15.0666	15.1944	15.14	15.6056	15.558	15.7907	15.2232	15.3771	15.7496	15.4222	15.4985	15.3558	15.5906	15.3291	15.2718	15.6542	15.1944	15.7907	15.2357	15.4665	15.3363	15.8222	15.3771	15.4222	15.6542	15.3703	15.6228	15.0666	16.1138	15.3003	15.4985	15.4295	15.6056	15.887	15.4366	15.3844	15.8064	15.8386	14.9947	15.4441	15.1461	15.3363	15.2088	15.5352	15.4295
LOC441087	15.1944	15.3625	14.9444	15.0071	15.14	15.0071	15.0012	15.4222	15.2169	15.1064	15.1588	15.0071	15.614	15.4513	15.4222	15.4366	15.6694	15.3153	15.4153	15.1064	15.392	15.6694	15.3003	16.2269	15.4295	15.5279	15.3082	15.2088	15.9121	15.1659	15.1196	15.5433	15.6228	15.0666	15.022	15.14	16.1898	14.988	14.8697	15.7496	15.0857	15.9631	15.4295	14.919	14.727	14.7574	14.6352	15.1196	14.0281
BLZF1	15.1332	15.0468	15.1659	14.988	15.152	14.7092	15.0468	15.2849	15.1461	14.9071	15.1461	14.9511	15.2577	15.3082	15.0468	15.3625	15.5279	15.092	15.3844	15.2357	15.5207	15.4513	15.0857	16.1048	15.6228	15.4295	15.6456	15.3003	15.6383	15.0012	15.0012	15.7668	15.392	14.896	15.079	15.0468	15.5833	14.5704	15.0337	15.6299	15.022	15.7668	15.614	15.2088	14.988	14.9071	14.9572	15.3771	14.1425
PPA2	15.1588	15.0284	15.1125	15.0012	15.2718	15.0284	15.2169	15.079	14.8639	14.8509	15.1332	15.2718	15.2788	15.4153	14.9821	15.392	15.3558	14.9316	15.4078	15.1196	15.6617	15.5756	15.4078	16.1138	15.6858	15.614	15.4295	15.3153	15.4754	15.1803	15.1871	15.5513	14.8764	15.1332	15.3558	15.3495	15.1064	14.7885	15.079	15.7038	15.1332	15.3495	15.558	15.4985	15.1732	15.0726	14.988	15.3844	14.3524
OCIAD1	15.1732	15.0143	15.1332	14.8764	15.092	14.919	15.0542	15.1803	15.1659	14.9511	15.1803	14.8007	15.3003	15.3291	15.0542	15.3703	15.3495	15.0542	15.2019	15.0143	15.6694	15.3844	15.1803	16.08	15.5906	15.1803	15.6228	15.3436	15.6228	15.0605	15.022	15.4295	15.1944	14.8509	15.14	15.1871	15.2169	14.6913	15.1268	15.6456	15.0726	15.3153	15.5983	15.3625	15.3153	14.922	14.8764	15.2651	14.3376
CST3	14.9249	15.1944	14.8576	15.2232	15.2788	15.3291	14.8326	14.9947	14.9371	14.919	14.807	15.6056	15.1871	14.8326	15.079	15.5136	15.1196	15.322	15.1196	15.1461	15.3082	14.6679	15.1732	14.4504	14.4221	14.3674	14.727	14.9757	14.7397	15.2501	15.5906	15.4366	14.7337	15.3558	15.3436	15.7739	16.3265	15.392	14.4043	15.4834	14.8697	15.3291	15.4441	14.988	15.0989	15.0284	15.3625	15.1268	15.3436
LOC731096	15.1659	15.5756	15.7203	15.7825	15.3153	15.4595	15.1461	15.7279	15.7279	15.7668	15.7354	15.7279	15.8064	15.7118	15.614	15.2232	15.5207	15.3625	15.6694	15.7354	15.1268	15.7668	15.2019	15.6617	15.5513	15.9631	15.4	15.6299	15.5668	15.614	15.7354	15.0337	15.7668	15.558	15.3625	15.4595	15.507	15.7038	15.5433	14.8326	15.7279	15.5833	15.1196	15.3703	15.0605	15.4665	15.2357	15.5983	15.1196
RNASET2	15.0012	15.2357	15.5279	15.2501	15.5352	15.3844	15.3625	15.4295	15.0989	14.7885	15.3495	15.2295	14.9821	14.9371	15.0012	15.1732	15.2501	15.4441	14.9757	15.1732	15.1803	14.8384	15.6858	14.9699	14.9249	14.6799	15.1732	15.2169	15.0406	15.092	15.0143	15.4153	14.9511	15.4153	15.1871	15.2295	14.5808	15.1871	15.3703	15.3003	15.3291	14.9125	15.5207	15.3771	15.5756	15.5207	15.4188	15.322	15.4985
ATF4	15.2232	15.4513	15.3558	15.4754	15.0726	15.4441	15.2295	15.5668	15.463	15.4295	15.3558	15.5983	15.5433	15.3771	15.392	15.6542	15.4222	15.2436	15.4595	15.5433	15.558	15.6617	15.3291	15.4	15.3558	15.7907	15.4754	15.1461	15.322	15.6299	15.6299	14.9371	15.2501	15.2088	15.5136	15.5906	15.3703	15.2295	15.2019	15.1588	15.4295	15.5756	15.1332	15.2436	15.4295	15.0468	15.1944	15.2718	15.2232
S100A10	15.079	14.896	14.9699	15.2849	15.1944	15.3363	15.1871	15.022	15.0666	15.0605	15.3436	15.3558	14.9371	14.9444	15.3003	15.7668	15.1125	15.6056	15.0337	15.2232	15.0726	15.1588	15.507	14.6073	15.0012	14.8697	15.2357	15.1125	14.9821	15.3771	15.4366	15.5668	15.2718	15.1064	15.5207	15.3187	15.4912	15.3082	14.8384	15.4153	15.0574	15.5207	15.2295	14.9371	15.2019	14.9757	15.3436	14.9125	15.7354
LTB	15.4595	15.079	15.9026	15.7668	15.8943	15.8306	15.9545	15.5279	15.4	15.4754	15.4441	15.2436	15.507	15.0857	15.1268	14.6738	15.3082	15.1659	14.8697	15.3003	15.1064	15.2436	15.558	15.2436	15.2501	15.4441	15.0726	15.2788	15.1803	15.14	15.6056	15.5756	15.5352	15.8943	15.4912	15.1268	14.896	15.1732	15.8544	14.6073	15.5352	15.1659	15.4834	15.2357	15.2501	15.8463	15.2788	15.9631	14.6457
LOC646200	15.322	15.5513	15.5668	15.4665	15.3436	15.4222	15.3291	15.3363	15.4441	15.7118	15.4665	15.4595	15.6772	15.5906	15.3082	15.1125	15.3625	15.4295	15.3003	15.4295	15.2788	15.3363	15.392	15.5207	15.4	15.7825	15.2849	15.4513	15.4595	15.4441	15.5668	15.1461	15.5279	15.4595	15.4665	15.2718	15.4441	15.4834	15.7354	14.9757	15.7425	15.4295	15.2501	15.2849	15.0468	15.4	15.3153	15.4222	15.4441
LOC728973	15.5513	15.4366	15.5207	15.507	15.4595	15.4912	15.5207	15.4595	15.5756	15.5668	15.4078	14.6913	14.8007	15.2019	15.3558	15.3363	15.3153	15.2788	15.4366	15.4513	15.3495	14.7337	15.4441	15.1332	15.507	14.7956	15.2295	15.4078	15.2753	15.0337	14.7763	15.3703	15.4834	15.5136	15.0857	15.2501	14.5352	15.3558	15.5756	14.9821	15.3082	14.6026	15.322	15.0337	15.2088	15.4912	15.507	15.4	15.5136
RPL31	15.3291	15.6299	15.6056	15.7203	15.7425	15.7038	15.4665	15.6617	15.6617	15.6056	15.4834	14.5006	14.7514	15.0726	15.7118	15.092	15.2232	15.4985	15.1871	15.507	15.322	14.7514	15.1871	14.9316	15.558	14.5006	15.6299	15.3771	14.9511	15.1871	15.1268	15.4	15.5983	15.7496	15.0605	14.9316	14.6738	15.4	15.6772	14.5915	15.4222	15.0012	14.9572	14.7574	15.092	15.5352	15.3082	15.4295	15.3703
LOC730740	14.8905	15.1064	14.7458	14.9444	14.8509	14.8384	14.8576	14.6738	14.8203	14.7763	14.8639	15.0857	14.807	14.7034	15.0071	15.1461	14.7956	14.9572	14.9249	14.9125	14.7825	14.5556	14.7458	14.3235	14.6352	14.7514	14.7697	14.6859	14.7514	14.9249	14.8384	15.1125	15.152	15.1659	15.1332	15.2651	15.6858	15.2849	14.964	15.5983	14.8576	15.3363	14.8764	15.507	15.5279	15.0542	15.2295	15.3003	15.2169
LOC651202	15.5433	15.3771	15.5833	15.4	15.2926	15.7203	15.4222	15.4366	15.6383	15.5756	15.4222	15.0468	14.964	15.2169	15.3363	15.3187	15.5983	15.3003	15.3495	15.4834	15.4153	15.0406	15.1196	15.1125	15.4513	15.092	15.2436	15.4595	15.3153	15.2295	15.1431	15.1944	15.4912	15.4912	15.1064	15.1332	15.022	15.4078	15.6858	14.7458	15.6694	15.1871	15.392	15.1064	15.1659	15.4153	12.4023	15.4153	15.507
CCND3	14.9947	15.1803	15.2295	15.3291	15.2436	15.0337	14.9371	15.0989	14.7574	15.2501	15.4	15.079	15.1944	14.8576	14.9444	14.7458	14.7825	14.8639	14.8509	14.8269	15.0605	15.0012	14.8007	14.4221	14.7981	14.8764	14.7514	14.6913	14.8444	14.919	14.9821	15.0143	14.964	15.3363	15.2501	15.0284	14.9511	15.2788	15.1064	15.3082	15.2019	14.5204	15.0726	15.3082	15.2651	15.2501	15.4	15.3436	15.4
IL10	15.2501	15.0666	14.9947	15.092	15.2295	14.8838	15.1332	15.14	15.3558	14.9316	15.0284	14.7574	14.7574	15.1659	14.8384	15.4295	15.3436	14.8444	15.2577	14.919	15.2232	15.1332	15.1944	15.9298	15.6772	14.9699	15.6772	15.3844	15.5906	14.8697	14.6073	15.3625	15.1125	14.919	14.6738	15.1461	14.5915	14.5808	15.0143	15.5352	15.0071	14.9316	15.5513	15.0284	15.3291	14.896	15.1196	15.0605	14.3287
UNC84B	15.5352	15.4295	15.4834	15.5756	15.4222	15.4153	15.3153	15.3082	15.3082	15.6228	15.4295	15.4834	15.4595	15.2232	15.2169	15.14	14.8697	15.1064	15.1659	15.3363	15.2926	15.1064	15.0406	15.0012	14.9947	15.3363	15.1125	15.0406	15.14	15.2232	15.079	15.2436	15.2232	15.5207	15.5983	15.0406	15.2849	15.5756	15.2849	15.2088	15.2169	15.0857	15.3558	15.6542	15.1944	15.3771	15.3363	15.4595	15.9121
RPS15	15.1461	15.2232	15.7425	15.152	15.558	15.6228	15.5513	15.1196	15.4754	15.4078	15.6299	15.0666	15.1732	15.3495	15.3625	15.1064	15.2436	15.2169	15.4754	15.2849	15.4366	15.0071	15.3363	15.1588	15.4366	15.0143	15.0989	15.6228	15.1588	15.2019	15.2577	15.3495	14.9757	15.4754	15.2926	15.3436	14.9699	15.2651	15.5983	14.657	15.4153	14.8269	15.5279	14.8132	15.3082	15.5756	15.5756	15.4441	15.2501
C5orf28	15.2169	14.7956	15.0666	14.8905	15.1461	14.9249	15.0284	15.1332	15.1268	14.8697	15.0071	14.8764	14.9018	15.322	14.9699	15.2651	15.3703	15.1125	15.2232	14.8905	15.4295	15.2577	15.2718	15.9631	15.5136	15.0726	15.3363	15.2436	15.5983	14.9316	14.8764	15.2926	15.0468	14.964	14.6073	15.1064	14.9018	14.8007	14.9947	15.5207	14.8326	15.152	15.4513	14.9699	15.1268	14.8203	14.8576	15.1461	14.3571
CCNI	15.4222	15.4078	15.2501	15.079	15.2232	15.14	15.4295	15.3153	15.3153	15.4222	15.0468	15.3291	15.4912	15.2926	15.1871	14.9316	15.1461	15.2357	14.9316	15.2718	15.1871	15.3153	15.2788	15.2295	15.0284	15.4	15.3153	15.2926	15.0857	15.4834	15.2788	15.0605	15.079	15.2651	15.2232	15.3625	14.8269	15.4754	15.2788	15.2926	15.4	14.8007	14.9444	15.14	15.3703	15.2169	15.3558	14.5915	15.3153
PRR13	14.964	15.1125	15.0071	15.1064	15.0989	15.0666	15.0071	15.0726	14.9125	14.9018	15.2169	15.5279	15.2357	14.896	14.9125	15.0012	14.896	14.9947	14.8764	15.0071	14.9249	15.1125	14.896	14.657	14.9125	15.1332	14.8764	14.764	14.988	15.152	15.2849	15.2295	15.0989	15.152	15.4513	15.1944	14.988	15.3625	14.919	15.4222	14.9821	15.1944	15.1871	15.6383	15.0012	15.0989	15.2849	15.2088	15.5906
EEF1B2	15.558	15.4441	15.6542	15.4222	15.2849	15.3495	15.5279	15.4665	15.463	15.5352	15.3844	15.1944	15.2436	15.1944	15.4595	15.1588	15.2169	15.3703	15.3436	15.3703	15.3153	15.2788	15.2469	15.2357	15.2849	15.4665	15.2232	15.3363	15.3558	15.079	15.1803	15.2577	15.5906	15.3082	15.3844	15.2788	15.0542	15.6456	15.6542	14.7825	15.4834	15.3436	15.2019	14.9757	15.1196	15.4513	15.1871	15.2232	15.3363
Septin 5	14.0201	13.9994	14.5254	15.2926	14.5915	14.2569	14.5556	14.6679	14.6679	14.4358	15.2926	14.4738	13.4366	14.6978	14.9249	14.9018	13.8676	14.7092	15.079	14.7574	14.0813	13.9915	14.6179	12.7505	13.8965	14.2476	13.7328	14.0429	14.4127	14.3815	13.4817	13.5234	14.8132	15.5352	15.6299	14.7337	15.4834	15.152	15.0726	15.8222	14.6457	15.2019	13.6881	15.7496	16.1237	15.1588	15.6542	16.0614	13.5206
RPS26L	15.5833	16.3265	15.7354	15.7118	16.3396	15.8544	16.4808	16.4545	13.771	13.814	16.1685	13.6785	15.7668	15.5983	15.6383	15.8463	16.2839	15.7983	15.614	13.6635	15.4912	16.4347	16.1448	15.5513	13.6669	14.0363	15.6617	16.2839	16.088	16.1382	15.9812	13.6849	15.8144	15.6228	16.1448	15.4912	13.6411	16.3733	15.9121	13.3074	15.6299	15.6383	15.3703	16.263	15.9812	13.8461	16.0968	15.9906	14.1632
ZNF14	15.14	14.9371	14.9249	14.9699	15.0012	14.727	14.9071	15.3625	15.0857	14.8384	15.1196	14.7337	15.3495	15.4985	15.1944	15.4078	15.4441	14.9249	15.3291	15.0666	15.4222	15.2926	15.0666	16.1898	15.5983	15.2926	15.2169	15.2577	15.7038	14.9572	14.6859	15.6056	15.6056	14.9125	14.7514	14.7574	15.5433	14.4358	14.9249	15.6383	14.919	15.5136	15.6694	15.0857	14.4597	14.6913	14.3333	15.0542	13.771
CD68	14.9371	14.8905	14.8132	14.919	15.0857	14.8203	14.5808	14.764	14.964	14.7574	14.7885	15.6542	15.1366	14.7337	15.1588	15.0989	14.8639	15.14	14.7825	14.8203	14.7885	14.7397	14.8697	14.5254	14.6073	14.4269	14.9071	14.5632	15.1944	14.8007	14.9018	14.9699	14.9371	14.9947	14.9018	15.3703	15.3495	15.322	14.8576	15.4078	14.764	15.6299	14.6352	15.0989	15.2577	15.3153	15.695	14.9249	15.6228
LOC645317	15.1196	15.1461	15.322	15.3153	15.3558	15.2232	15.0605	14.988	14.9071	14.8764	15.1944	15.5756	15.3771	15.092	14.9757	15.1268	14.9444	14.8007	15.1332	15.0726	15.0542	15.0726	14.988	14.9821	14.9444	15.4985	15.1944	14.919	14.919	14.8639	15.4665	15.1064	14.9071	15.0542	15.3771	15.2357	15.2651	15.1196	15.2088	15.2232	15.092	15.1064	15.14	15.5352	15.2295	15.3003	15.4834	15.3153	15.5668
TUBA1B	14.896	15.0071	15.1196	15.2169	15.079	14.8576	15.2232	15.1064	15.152	14.896	15.4754	15.2849	15.0468	14.6026	14.8838	15.0071	14.7697	15.0666	14.8576	14.8384	14.7956	14.5352	14.9249	14.4597	14.727	15.6456	15.1332	14.6679	14.8132	15.0542	15.1332	15.3291	15.13	15.14	15.3291	15.1659	14.9371	15.14	15.022	15.0284	14.9572	14.919	15.1588	15.1588	15.4	15.4595	15.0542	14.9821	15.4754
NCOA4	14.807	14.6457	14.3859	15.0726	14.6859	14.5204	13.9292	14.6073	14.5704	14.5658	14.5504	15.0542	14.9699	14.5157	14.7514	14.5915	14.4221	14.4404	14.4954	14.7697	14.3571	14.5456	14.196	13.9	14.2476	14.8269	14.3193	14.29	14.4692	14.4221	14.5556	14.8509	14.4903	14.8007	15.5833	14.8801	14.7397	15.3703	14.8326	15.7118	14.7458	15.3703	14.3107	15.7118	15.9472	15.0337	15.4078	15.4366	15.2577
SNRPD2	15.3558	15.2577	15.5756	15.4985	15.507	15.4665	15.3771	15.2718	15.2088	15.4441	15.4912	15.0284	15.4441	15.2436	14.9947	15.1944	14.8203	15.2577	15.2169	15.3436	15.3291	15.0989	15.1588	15.1871	15.2019	15.7038	15.022	15.3082	15.0989	15.0284	15.3771	15.2232	15.1659	15.3465	15.2614	15.0605	14.9249	15.0666	15.6228	14.9371	15.3844	15.0284	15.2169	15.2926	15.079	15.3558	15.4441	15.4834	15.3291
CLEC2D	15.3436	15.4	15.3436	15.3082	15.1803	15.3703	15.3436	15.558	15.2849	15.5513	14.8697	14.9071	15.6456	15.1461	15.2849	14.9821	15.614	15.2019	15.152	15.558	15.022	15.6772	15.2469	15.1803	15.2753	15.7983	15.3844	15.1064	15.0468	15.392	15.3363	15.0012	15.4	15.0468	14.9757	15.1125	15.3363	15.2718	15.2232	15.1125	15.7907	15.7425	15.1125	15.3153	14.9757	15.1064	15.1064	15.0857	15.0406
HCST	14.7885	15.2019	15.14	15.0143	15.4985	15.1871	15.3558	14.8838	14.8697	15.0542	15.2436	14.7034	14.8764	14.8697	15.1064	14.9757	14.6124	15.1944	15.1944	15.1944	14.9572	14.9444	15.1332	14.7155	14.5401	14.9071	14.988	15.1196	14.6457	14.6625	14.8838	15.1268	14.6679	15.5513	15.4078	15.0542	15.695	15.0468	15.1332	14.919	15.1268	14.8444	15.1944	15.0143	15.0666	15.392	15.4366	15.2019	15.322
LOC647856	15.3625	15.4153	15.6772	15.695	15.3363	15.5983	15.392	15.4912	15.2019	15.6858	15.5513	15.3436	15.6383	15.558	15.2357	15.022	15.1803	15.2651	15.2436	15.5513	15.1461	15.5983	15.1659	15.3558	15.2295	15.7587	15.4441	15.392	15.1871	15.3082	15.5513	14.8697	15.507	15.5833	15.2788	15.2436	15.1659	15.3436	15.8306	14.5157	15.8621	15.0542	15.1732	14.9511	14.8838	15.4295	15.2169	15.4985	15.1268
LOC650152	15.0605	15.0989	14.8269	14.9316	14.964	14.988	15.079	15.0337	15.0337	15.0284	15.1064	15.3003	15.0542	14.9316	15.0605	15.1871	14.9699	15.0468	15.0012	14.8697	14.9757	14.9572	14.8269	14.6978	14.9018	14.9821	14.9511	14.8838	14.9071	15.1064	15.3153	15.0071	14.8639	14.9371	15.1659	15.2849	15.0284	15.0726	15.0605	15.2019	15.0143	15.2295	15.0989	15.3465	15.0337	15.14	15.0468	14.8764	15.4595
KLF2	15.022	14.9757	14.9511	14.7458	14.9757	15.2501	14.964	15.1461	14.7397	15.022	14.9249	14.8697	15.0012	14.9699	15.1659	15.152	15.6456	15.4153	15.2088	15.4665	14.9125	15.2849	15.2232	14.988	15.1944	15.1461	14.9444	15.1268	14.7763	15.3436	14.8576	14.9071	15.2295	15.092	15.2357	14.6679	15.4222	14.9947	14.6073	15.1944	14.7208	15.1196	15.2232	15.0542	14.8326	14.922	14.8132	15.1064	15.2788
CYBA	14.7956	14.8384	15.022	14.7208	15.1064	14.7885	14.8697	14.3815	14.7763	14.7337	14.9821	15.2651	14.6405	15.0437	15.092	15.2718	14.5157	15.1732	14.9125	14.6978	15.1125	14.4597	14.7825	14.3376	14.5865	14.5971	14.5352	14.7956	14.5658	14.9371	14.9444	15.0726	14.5109	15.079	15.2718	15.1732	15.4	15.4153	15.0284	15.0143	14.8007	14.8639	15.2577	15.2232	15.0406	15.4834	15.5833	15.0726	15.3495
EIF3E	15.2295	15.2718	15.4513	15.2788	15.4153	15.2718	15.2019	15.2019	14.8132	15.2718	14.6516	14.5352	15.0406	14.8639	15.1803	14.8764	15.152	14.9821	14.9699	15.0857	15.0857	15.1803	15.2651	14.8444	15.0726	15.6617	15.1461	15.2295	14.9371	15.0857	15.0284	15.0406	15.1803	15.2718	15.3082	15.0989	14.6457	15.1944	15.4834	15.0605	15.5433	14.7034	15.0012	15.1268	14.9316	15.1732	15.2232	15.14	15.2436
ECGF1	14.4549	14.3947	14.227	14.9757	14.9018	14.5057	14.5157	14.6516	14.5204	14.2227	14.8444	15.4513	14.2788	13.7743	14.5254	15.3771	14.8007	15.2295	14.6405	14.5971	14.7034	14.0114	14.5456	14.2429	14.5109	13.322	14.3287	14.3193	14.4455	14.6738	14.9511	14.9018	14.4127	14.7885	14.6026	15.2088	15.5352	14.9511	14.5658	15.5668	14.196	14.9071	15.3625	15.1332	14.9699	15.3703	15.4912	14.964	15.4366
LOC646766	15.4366	15.3291	15.6383	15.1588	15.2501	15.2926	15.022	14.8509	15.1732	15.4153	15.6456	15.0726	15.1196	15.3625	15.3436	14.9699	15.0666	15.4834	15.2295	15.4	15.2718	15.0857	14.9444	15.2926	15.3771	15.3771	14.7208	15.0989	15.2436	14.988	15.2357	15.14	15.2788	15.2232	15.3003	15.022	15.079	15.3003	15.7739	14.5704	15.3625	14.9444	15.3436	15.022	15.1837	15.7425	15.4188	15.4754	15.3771
TXNIP	15.1803	15.3495	15.2436	15.0406	15.2019	14.9125	14.9316	15.2169	14.9821	15.3082	14.9511	14.4316	15.2295	14.4647	14.6405	14.7697	14.5057	14.657	14.2145	14.6073	14.4692	13.6235	14.5254	13.9693	15.1064	14.0429	14.2745	14.7155	14.8269	14.7574	14.6457	15.2501	14.9125	15.392	14.9125	15.3291	14.8509	15.2357	15.3291	15.4985	15.3771	14.6291	15.092	14.8697	15.1588	15.4366	15.3291	15.392	15.558
CFL1	14.9125	14.919	14.988	15.1268	15.1332	15.0605	15.0406	14.964	14.9757	15.0666	15.1125	15.1461	14.727	14.8444	14.8576	14.9071	14.807	15.0143	14.7763	14.964	14.7514	14.3724	14.919	14.4549	14.8326	14.6859	14.764	14.6625	14.6235	14.807	14.9699	15.079	14.9572	15.0605	15.0726	15.3082	15.0143	14.9757	14.9757	15.0542	14.8905	14.7885	14.8905	15.2501	15.0071	15.1332	15.2651	14.7956	15.4513
PTMA	15.4441	15.3558	15.1064	14.9249	15.0468	15.0143	15.1196	15.322	15.0542	15.2088	14.9572	14.4358	14.8838	14.8203	15.2295	15.1196	15.4985	15.2501	14.9511	15.3844	14.9444	14.8838	15.0012	14.9444	15.0989	14.8444	15.1659	15.0012	15.0726	14.6978	14.8639	15.092	15.6542	14.8444	14.8764	14.9444	14.919	15.4665	15.0012	15.1461	15.2232	15.2436	14.9757	14.8203	15.0726	15.152	15.1332	14.8905	15.4078
EIF4A1	14.9821	15.2788	14.7763	14.9511	14.8764	14.8697	14.764	15.3003	15.0605	15.0406	14.8576	15.6299	15.3291	14.6124	14.8905	15.0542	15.0406	15.0726	14.9947	14.9572	14.988	15.2088	14.8355	15.1064	14.807	15.4595	15.3703	14.8764	14.8509	15.1732	15.4078	14.8326	15.3558	14.7574	15.392	15.2577	15.2926	15.4513	14.9444	15.392	15.14	15.6056	14.576	15.0666	14.807	15.079	15.1732	14.8007	15.4222
LOC441775	15.392	15.392	15.7118	15.4441	15.3291	15.4	15.2718	15.2232	15.4985	15.5906	15.4513	15.2232	15.6056	15.4366	15.3844	15.1332	15.3363	15.3844	15.4295	15.4595	15.3844	15.3436	15.2295	15.3082	15.4595	15.4912	15.0406	15.4665	15.3082	15.6542	15.3495	15.1659	15.3291	15.4834	15.322	15.2019	15.3436	15.4366	15.558	14.7397	15.507	15.0468	15.4366	15.4222	14.227	15.5668	15.3703	15.5279	15.1871
GNAS	14.6978	14.988	15.0143	14.9572	14.8132	14.8764	14.8384	15.0605	14.8838	15.079	15.0406	15.022	14.7155	14.7574	14.7208	15.0605	14.4738	15.0337	14.8838	15.1659	14.8444	14.8639	15.0143	14.576	14.7155	14.9572	14.8203	14.9071	14.5971	14.9071	14.9316	14.6799	14.8697	15.0406	15.2019	15.0726	15.152	15.2019	14.8905	15.1871	14.8639	14.8697	14.6799	15.2651	15.1332	14.6978	15.0337	15.2436	14.3859
LOC440927	15.2357	15.4595	15.3153	15.1125	14.9572	14.9444	14.8132	14.8905	15.2295	15.392	15.2819	14.6124	14.7885	15.2357	15.1332	14.9947	15.0542	15.3558	15.2357	15.2926	15.2088	14.7092	14.8355	15.14	14.9699	14.727	14.8509	15.3495	15.2232	14.8838	14.7397	14.9444	15.2849	15.1588	14.657	15.2169	14.5704	15.4441	15.4595	14.6625	15.1064	14.5808	15.1659	14.964	15.2788	15.2926	15.5136	15.3082	15.3844
LOC646483	15.4078	15.3082	15.2232	15.3558	15.1588	15.2577	15.152	15.3771	15.2926	15.3436	14.9371	15.2169	15.3363	15.1125	15.1125	14.8326	14.9316	14.9018	15.0989	15.322	15.152	15.4078	14.9125	15.0955	15.2436	15.5983	15.152	15.1732	15.1268	15.4754	15.2501	15.0284	15.4595	15.2436	15.4	15.092	15.392	15.4222	15.4	14.7697	15.6542	15.2501	14.964	15.3003	14.7034	15.1125	15.0143	15.1588	15.2295
SULT1A1	15.1064	14.807	14.896	14.657	14.9511	14.7763	14.7697	14.9572	15.0143	14.7155	14.9757	14.5658	14.7397	15.0143	14.807	15.0468	14.9947	14.8838	15.0406	14.8132	15.2019	14.9699	14.9572	15.5906	15.322	14.7155	15.1803	15.0468	15.2926	14.6799	14.5456	15.3436	14.6913	14.8905	14.8132	14.8269	14.7458	14.5109	14.896	15.3558	14.6679	14.6859	15.3495	14.6679	14.9018	14.657	14.8326	14.9511	14.227
COX7C	15.2019	15.2501	15.3082	15.0989	15.1125	15.0012	15.0666	14.7697	15.1588	15.322	15.1268	15.3844	15.2232	15.0542	14.988	14.896	15.0605	15.1803	15.1064	15.2577	14.9979	15.1461	15.1268	14.8132	15.1732	15.2169	15.0605	15.3558	15.0666	15.2718	15.507	14.9947	15.1196	15.1268	15.0337	15.152	15.3291	15.2577	15.4295	14.988	15.2295	15.0337	15.079	15.1196	14.4043	15.2088	14.9125	15.2295	15.2926
LOC100008589	15.0143	15.1332	15.2926	14.8007	14.9371	14.896	15.0143	14.8269	14.988	15.1588	14.896	14.9249	14.9757	14.7956	14.5915	14.9371	14.8444	14.807	14.5204	14.6405	14.919	14.7825	14.7208	14.7208	14.6124	15.2357	14.5504	14.9125	15.0542	14.896	14.7825	14.764	15.2926	15.0284	14.9947	14.988	15.7118	15.4912	14.7763	15.2169	14.7825	14.6679	14.7092	14.5057	15.1064	14.764	15.1461	14.8203	14.1299
NFKBIA	15.6772	15.4985	14.9572	14.9371	15.2088	15.3082	15.3363	15.3436	15.7354	15.6383	15.4366	16.5762	15.6858	15.9906	15.9026	15.558	15.7038	15.7907	16.1048	15.7668	16.2994	16.5063	15.9906	15.8386	15.4834	16.0528	15.7907	15.5433	15.4295	15.7203	15.7038	16.3265	16.4347	15.3771	15.558	15.7983	15.4153	15.695	14.8007	14.8269	15.7739	15.2169	14.9249	15.5906	15.7203	14.2007	14.3905	14.6516	14.2745
LOC731365	15.2088	15.3844	15.2651	15.1332	15.0071	15.1588	14.807	15.0468	15.2501	15.3291	15.1871	15.2501	15.3844	15.1803	15.2232	14.8269	15.0468	15.1332	15.1803	15.3082	14.8509	15.2501	15.0071	15.0857	15.2577	15.6542	14.9821	15.0337	15.152	15.2577	15.392	14.8764	15.4366	15.0071	15.1125	15.0857	15.3771	15.3153	15.4441	14.8444	15.4366	15.3082	14.9699	14.8326	14.8269	15.0605	14.8509	15.0468	15.1803
RPS4X	15.4153	14.964	15.4222	15.2088	14.9125	15.2357	14.9018	15.2926	15.5352	15.5279	15.2577	15.4441	15.4665	15.392	15.3495	14.8509	15.2926	15.2849	15.322	15.4153	14.8764	15.4665	14.9018	15.2788	15.3495	15.5352	15.0857	15.4	15.2357	15.4153	15.5756	14.919	15.0605	14.7034	14.7397	14.6913	14.4851	14.9699	15.5352	14.7092	15.5279	14.4647	15.0468	14.9071	14.7956	15.322	14.8007	15.1125	14.9572
DDX51	14.7092	14.9947	15.0468	14.8838	14.8905	14.4316	14.8764	15.0284	14.9444	14.7397	14.919	14.9125	14.9572	15.2295	14.9316	15.0666	15.14	14.9757	15.0726	14.5915	15.2436	14.919	15.2577	15.8463	15.3003	14.988	15.092	15.1659	15.4441	14.4851	14.5204	15.7038	14.988	14.7092	14.7825	14.7397	15.2577	13.9804	14.8639	15.5906	14.9018	15.0989	15.3844	14.4316	13.7942	14.9572	14.3859	14.919	13.1247
RPS26L1	15.2926	16.088	15.614	15.6056	16.1306	15.5352	16.1448	16.0268	13.5206	13.6167	15.8064	14.0472	15.7279	15.4595	15.4665	15.8621	15.9545	15.5833	15.3363	13.6537	15.3436	16.018	15.8943	15.4222	13.3172	14.0321	15.3495	16.0359	15.9812	16.0528	15.921	13.3814	15.6858	15.507	16.0706	15.3558	13.9523	16.0445	15.8621	13.0781	15.4754	15.3625	15.2718	16.0445	15.9631	13.893	16.009	15.8386	13.8569
CATSPER2	14.5865	14.5254	14.9071	14.7885	14.8576	14.4877	14.6352	14.8764	14.7208	14.6978	14.9018	14.9316	15.2019	15.3558	14.8509	15.079	15.0989	14.7825	15.14	14.764	15.2169	15.1732	14.9821	15.921	15.1268	15.1732	15.0071	14.896	15.2849	14.9125	14.9125	15.4078	14.6859	14.8326	14.9511	14.5808	15.4295	14.055	14.7825	15.322	14.7092	15.3558	15.3153	14.896	14.3997	14.8509	14.2925	15.0012	13.5091
ATP5B	14.8838	15.0337	14.8509	14.9018	14.9699	14.9947	14.9249	15.0542	14.8764	14.8444	14.9316	15.1332	14.6859	14.5704	14.8444	14.6799	14.657	15.0284	14.6738	14.7514	14.7397	14.5704	14.764	14.3905	14.6516	15.0012	14.9018	14.5915	14.7337	14.7397	14.7514	14.7697	14.896	14.9511	15.1461	15.0071	14.6073	15.2436	14.9511	15.1196	14.9947	14.7514	14.7825	14.9444	14.919	15.2019	15.2019	14.9071	15.5513
LOC641848	15.5906	15.0406	15.4754	15.2019	15.2169	15.2788	15.3495	15.3703	15.2232	15.3363	15.3291	14.6235	14.7825	15.0071	15.0284	14.6978	15.2718	15.0857	14.9572	15.0605	15.0468	14.9249	15.152	14.922	15.2169	14.964	15.0666	15.1803	15.0337	14.7155	14.6352	15.1588	15.4295	15.2849	15.0542	14.8384	14.3674	15.1332	15.507	14.5006	15.3558	14.7208	14.8132	14.7825	15.2436	15.2718	15.152	15.2169	15.2357
LOC341457	14.6859	14.9316	14.8905	14.7763	14.7697	14.6291	14.4903	14.6291	14.7825	14.9699	14.9699	15.4295	15.1268	14.964	14.6859	14.5971	14.6738	14.8203	14.727	14.9371	14.7458	14.8697	14.5401	14.3193	14.6978	15.392	14.4269	14.8326	14.6026	15.3291	15.3625	14.5915	14.9249	14.7458	14.919	14.9125	15.2295	15.022	15.0071	14.7514	14.8269	15.4153	15.0284	15.3558	15.0143	15.2849	15.2718	15.0666	15.6542
FOS	14.8444	14.6679	14.2745	14.5556	14.4043	15.4834	15.4366	15.7425	15.5668	15.558	15.3003	15.8222	15.6228	16.1138	15.9991	16.0528	16.1536	15.9472	15.7739	16.1448	15.695	15.9545	15.8222	15.7279	15.6056	15.7739	15.4834	15.7038	15.8306	15.6858	15.9631	15.0542	15.4153	15.0012	15.1554	15.392	15.5756	15.5279	13.253	15.5546	15.1461	15.8701	13.322	15.5279	13.8897	14.807	15.2501	14.2569	15.2651
FTHL3	14.7034	14.4692	14.5999	14.1425	14.2099	14.5352	14.6859	14.8384	15.0468	14.6913	15.152	14.3859	14.4692	14.7092	15.0143	15.4834	15.3291	15.0605	15.0666	15.0284	15.1732	14.8203	15.1461	14.6235	14.8905	14.2925	14.919	14.9444	14.6913	14.8132	14.764	15.2651	14.727	14.6352	14.7155	14.6179	14.6978	14.9018	14.5157	14.5254	14.4221	14.6738	14.8697	15.0406	15.7118	14.7763	15.0857	14.9371	15.1125
RPL36AL	15.0989	15.0726	15.2718	15.0542	15.1871	15.4513	14.988	14.919	15.092	14.9125	14.7458	15.2788	15.2088	15.1064	15.0857	14.7397	14.8764	14.8509	15.2501	14.9511	15.14	15.0284	14.6738	14.764	15.152	15.5433	14.6457	15.0666	14.9947	15.2169	15.7118	14.8838	15.022	14.5915	14.988	15.1196	15.1871	14.8203	15.4153	14.6235	15.1871	15.1803	15.0542	14.9947	14.8905	15.0857	14.896	15.2357	15.3558
ALPP	15.0406	14.7458	14.764	14.6913	15.0406	14.6738	14.8203	15.0071	14.7155	14.657	14.7337	14.4127	14.8203	15.0989	14.8326	15.3082	15.2088	14.7458	15.0143	14.8764	15.1659	15.0143	15.14	15.7425	15.3703	14.919	15.1588	14.9699	15.3625	14.7763	14.6405	15.152	14.9821	14.7337	14.6625	14.7155	14.8838	14.4269	14.6799	15.2849	14.5704	14.8576	15.2357	14.5808	14.657	14.4404	14.5157	14.6799	13.9076
LOC731985	15.4295	15.3003	15.4441	15.2651	15.1659	15.4295	15.2651	15.2295	15.3495	15.4834	15.1659	14.8132	14.5971	15.4078	15.1732	15.0406	15.1871	15.3771	15.5352	15.4366	15.0337	14.896	15.092	15.3291	15.5279	14.8326	15.1196	15.4153	15.1659	14.8203	15.0406	14.8576	15.0406	15.1871	14.7208	15.1803	14.5658	15.1461	15.4754	14.7034	15.392	14.4177	15.2651	14.8905	14.0114	15.4441	15.0284	15.3558	15.4153
LOC642989	15.3153	15.2436	15.4078	15.1659	15.022	15.2651	15.1732	15.1732	15.0012	15.3703	15.14	14.4549	14.8905	14.9249	15.1461	14.8576	15.1332	14.919	14.9821	15.1125	14.9979	15.2169	14.7956	14.8576	15.1871	14.9125	15.14	15.1588	15.2019	14.8509	15.2088	15.1732	15.558	15.022	15.0012	14.7514	15.1332	15.1659	15.4665	14.3571	15.322	15.4	14.8203	15.0605	14.964	15.2436	14.9699	15.0284	15.1623
RPL26	15.0071	15.0542	15.1944	15.8064	15.6858	15.8064	15.7118	15.7038	15.14	15.1196	15.0143	15.0012	14.6124	14.8384	15.0726	14.7607	14.8509	15.079	14.7458	15.1268	14.964	14.7956	15.6542	14.53	15.1332	14.9316	15.6858	15.0857	14.7956	14.9699	15.0726	14.8007	15.13	15.7038	14.8697	14.7092	14.8326	14.9125	15.3363	14.6457	14.9125	14.4404	15.0605	14.4597	14.6913	14.9018	14.7337	14.9444	14.919
GPX1	13.9363	14.4404	14.4177	14.8697	14.6738	14.8269	14.5401	14.4647	14.3287	14.3235	14.5376	14.6978	13.9363	14.3674	14.6679	14.5456	14.2145	14.6625	14.5865	14.5401	14.4851	13.9879	14.5504	13.6108	14.235	14.113	14.2307	14.3622	14.4083	14.576	14.0626	14.7514	14.3571	14.9444	14.7574	14.9249	14.8203	14.7514	14.764	15.2436	14.3287	15.092	14.0775	14.6291	15.4665	14.6151	15.0726	15.3625	14.4404
FLJ44124	15.092	14.727	14.807	14.7825	14.919	14.7034	14.8838	15.0143	15.0726	14.7092	14.8326	14.2521	14.7092	14.9821	14.8132	15.0337	15.2295	14.7514	14.988	14.7155	15.2501	14.7574	14.9757	15.695	15.4078	14.5157	15.2088	15.0071	15.2577	14.6457	14.53	15.1332	14.6978	14.7397	14.4404	14.964	14.347	14.4043	14.727	15.3291	14.8444	14.7763	15.2849	14.6859	14.6026	14.6151	14.5704	14.8576	14.0036
KCNH6	15.0542	15.1232	14.7697	14.6738	14.8203	14.6405	14.8639	14.7825	14.9699	14.7697	15.022	14.7956	14.377	15.14	14.8007	15.0143	15.2788	14.9699	15.0857	14.6859	15.1196	14.6516	15.022	15.6456	15.4222	14.764	15.1064	15.092	15.4366	14.5456	14.2307	15.4222	14.9699	14.5057	14.4269	14.7208	14.9444	14.3333	14.9018	15.3771	14.6978	14.6352	15.4078	14.2184	13.9399	14.7956	14.2388	14.9572	13.3419
LOC729466	14.8269	15.0012	14.8639	14.9071	15.0337	15.0989	15.0337	14.9511	14.8384	14.988	14.7956	15.1268	14.6679	14.6516	14.9511	14.988	15.0337	15.0012	14.7697	14.9821	14.9316	14.8509	14.964	14.6352	14.919	15.2088	14.9249	14.9249	14.5352	14.9947	15.0468	14.8269	15.0337	15.0143	15.1803	15.0143	15.2088	14.9444	14.7155	15.0666	14.896	14.9572	14.9371	15.1461	14.5401	14.7092	14.9444	14.9316	15.1944
CD74	14.9699	14.9572	14.9018	15.1196	15.2577	14.8444	14.5057	14.9699	15.3291	15.14	14.6352	15.3625	14.9511	14.9757	14.6124	14.9125	15.0284	14.8384	14.8203	15.152	14.9018	14.4647	15.1125	14.9018	15.0143	14.1753	14.6913	14.9572	14.9444	15.022	14.8203	15.0989	14.6291	15.2019	14.8838	15.5668	15.5906	15.2232	14.8203	15.1767	14.9699	15.0636	15.0143	14.8764	14.07	15.1196	14.764	14.7885	15.1064
SAT1	14.4269	14.576	14.1343	14.6352	14.3423	14.9511	14.7514	15.0857	15.022	14.4738	14.6457	15.558	14.6457	14.4795	14.6978	15.3003	15.0857	15.0406	14.9444	14.5254	14.807	14.4738	15.0726	14.4903	14.7981	14.6124	14.9572	14.4692	14.8384	14.7458	14.9572	14.53	14.4647	14.7155	14.9572	14.9947	15.4665	14.7092	14.377	15.1767	14.3571	15.2088	14.6945	15.5756	15.3558	14.8639	14.7825	14.5204	15.2718
CEBPB	14.1709	14.4954	14.4954	14.1053	14.5109	15.3625	14.8444	14.6405	15.1944	14.3524	14.964	15.7668	14.8639	15.079	14.9371	15.2501	15.1695	15.2926	15.5668	15.022	15.4513	15.3003	15.3771	14.4455	14.9071	14.6073	14.8384	14.8384	14.8326	15.507	15.2651	14.9821	13.6503	14.4083	14.4083	14.8509	14.8697	14.2698	14.4903	15.2788	13.698	14.7825	15.022	15.2577	15.3771	14.7514	14.8838	14.764	15.0284
LOC649447	15.0857	14.8203	15.1588	15.14	15.1196	15.3558	15.2088	15.092	15.079	15.2357	15.0666	15.0605	15.1366	14.7697	14.9018	14.8203	14.7514	14.9444	15.0071	15.1332	14.8269	14.8576	14.9947	14.807	15.022	15.2501	14.9125	15.152	14.6799	15.1461	15.1732	14.7458	15.0012	14.9757	14.9249	14.8697	14.807	14.7208	15.2926	14.4043	15.1732	14.8326	14.919	15.0468	14.896	15.1268	15.0666	14.8269	14.9821
ZNF549	14.7208	14.6978	14.576	14.5915	14.8384	14.3859	14.5254	14.8326	14.727	14.5157	14.5109	14.9444	15.2718	15.0284	14.9071	14.919	15.1268	14.5204	14.7574	14.7458	15.1332	15.4366	14.6978	15.7983	15.0666	15.1659	14.9316	14.7337	15.3495	14.8905	14.8444	15.1196	15.3153	14.5865	14.6291	14.6859	15.7496	14.3859	14.4549	15.2718	14.5109	15.8306	15.0857	14.8007	14.2836	14.0856	13.8496	14.7574	13.4007
DAZAP2	14.8007	14.9699	14.6625	14.7155	14.657	14.9821	14.8905	14.9821	14.9947	14.9371	14.6405	15.3082	15.0989	14.9125	14.7956	14.8838	14.8269	14.9371	14.8132	14.9947	14.6738	14.9821	14.9699	14.7574	14.8203	15.0071	15.0143	14.6073	14.896	14.8326	15.0955	14.6405	14.7697	14.8639	14.9821	15.1588	14.8905	15.2169	14.5352	14.9572	14.727	15.022	14.6291	14.9125	14.7155	14.6679	14.7697	14.576	15.0337
PCBP2	14.8326	15.0857	14.7397	14.8639	14.5504	14.8639	14.6291	14.9757	14.9511	14.9249	14.7574	15.0989	15.0857	14.7794	14.9572	14.8697	14.8326	14.8576	14.7956	14.9249	14.6124	15.0542	14.7885	14.8697	15.0605	14.8384	14.8697	14.807	14.964	14.964	14.7697	14.727	14.9947	14.807	14.8509	14.896	14.9316	15.092	14.8269	14.6799	14.9249	15.4366	14.4455	14.8639	14.9511	14.5456	14.8905	14.5704	15.079
RPL36	15.0284	15.092	15.2849	15.0468	15.1732	15.2019	14.9511	14.8132	15.1125	15.0071	15.1732	14.5254	14.7763	15.1196	15.1196	14.7607	15.0012	15.0989	14.9371	15.0012	14.8326	14.9371	14.8764	15.0605	14.964	14.8132	14.7763	15.0542	14.9699	14.8444	14.964	14.8132	15.1064	15.1196	14.7458	14.8905	14.9821	14.919	15.2501	14.1504	14.9071	14.657	15.0071	14.5109	14.6516	15.1461	14.8384	15.079	14.7034
LOC653489	14.7458	14.4455	14.919	14.807	15.0143	14.5865	14.6978	14.7397	14.5658	14.6235	14.8838	14.5865	14.6913	14.8905	14.5865	14.8639	14.8132	14.4903	14.8269	14.6026	14.9511	14.8905	14.7763	15.3363	15.0337	14.6352	14.9947	14.8697	15.0284	14.6352	14.5704	15.0857	14.3287	14.7697	14.4795	14.5658	14.2388	14.0775	14.8444	14.7574	14.5254	14.5277	15.1461	14.764	15.0284	14.8132	14.7885	14.9018	14.235
CALM2	14.8509	14.764	14.3905	14.5401	14.4647	14.5606	14.1504	14.5808	14.5157	14.6516	14.3018	14.7514	14.5915	14.3018	14.4358	14.5658	14.5658	14.5606	14.4404	14.4954	14.347	14.5401	14.1299	13.9842	14.3107	14.2745	14.3674	14.235	14.5504	14.5865	14.7956	14.7825	14.7034	14.3815	14.576	14.8639	14.7092	15.0012	14.6405	15.14	14.7397	15.2926	14.5204	14.7397	14.4738	14.5157	14.7155	14.6679	15.0989
LOC441377	15.2788	15.8784	15.3291	15.2436	15.8463	15.3153	15.7279	15.8621	13.4845	13.4495	15.7038	13.5766	15.5983	15.0337	15.2788	15.6456	15.8222	15.1196	15.1268	13.6602	15.0143	15.9727	15.6299	15.152	13.3122	13.9034	15.0337	15.7354	15.6772	15.8222	15.5136	13.2643	15.5833	15.2169	15.6772	14.9071	14.1219	15.7425	15.6617	13.0479	15.2849	15.5513	15.0337	15.9631	15.5352	13.72	15.7587	15.6056	13.5178
FXYD5	14.9757	14.6291	15.0012	14.896	15.3625	15.022	15.1803	15.1554	14.8905	14.8203	15.3082	14.9947	14.6179	14.7794	14.8269	14.7514	14.6352	14.9125	14.7155	14.9071	14.6679	14.6457	15.1064	14.8838	15.0468	14.9018	14.5254	14.4597	14.8203	15.1268	14.8132	14.4177	14.4358	15.1125	14.3815	14.8203	14.6124	14.8697	14.9821	14.7956	15.0406	14.6073	14.5704	14.6179	14.9444	15.3495	15.0989	14.896	14.988
AP2S1	14.5254	14.6859	14.6799	14.8269	14.9444	14.5456	14.5606	14.5352	14.5456	14.4851	14.6679	14.6405	14.3423	14.5204	14.5504	14.6073	14.347	14.6859	14.5971	14.5352	14.4795	14.3423	14.6679	14.1388	14.2974	14.5057	14.3548	14.4221	14.3905	14.4692	14.6124	14.7763	14.4738	14.9316	14.8326	14.7956	14.9071	14.7155	14.6352	14.9511	14.4738	14.4954	14.6679	14.6913	14.8764	14.9699	15.14	14.657	15.0857
ETS1	15.2849	14.9071	15.0284	15.0337	14.988	14.5704	14.8509	14.8444	14.7885	15.2926	14.764	14.8326	15.4078	14.4127	14.5556	14.1753	14.5915	14.6179	14.3724	14.8007	14.3622	15.1196	14.4903	14.4738	14.6291	15.3291	14.4043	14.7885	14.6352	15.0989	15.0605	14.9757	15.14	14.9018	14.7763	14.3571	15.1588	14.8326	15.0406	14.4358	15.3003	15.0143	14.6859	14.9316	14.4795	14.8905	14.5971	15.0071	14.6679
FLJ46309	14.8576	14.4127	14.4903	14.4903	14.7397	14.4549	14.5865	14.7763	14.7092	14.5456	14.6859	14.0813	14.3622	15.022	14.7574	15.0857	14.8384	14.6073	14.896	14.6738	15.2295	14.6073	14.7337	15.614	15.14	14.4903	14.9699	14.7574	15.1064	14.4127	14.1088	15.2019	14.6457	14.5808	14.5401	14.4177	14.6625	14.1425	14.6026	15.092	14.4549	14.5658	15.3363	14.5456	14.3287	14.5352	14.1262	14.9699	13.9468
FTHL2	14.5204	14.3674	14.5157	14.3287	14.2521	14.4455	14.5504	14.7337	14.919	14.5808	15.079	13.9673	13.4519	14.6352	14.919	15.2926	14.9018	14.9511	14.964	14.8444	15.0406	13.9956	15.0989	14.5456	14.7763	13.554	14.6679	14.7697	14.6978	14.1875	14.1262	15.2088	14.3235	14.6405	14.0736	14.6457	14.1299	14.53	14.4504	14.8007	14.347	13.9144	14.764	14.2606	15.322	14.3972	14.964	14.9757	14.9249
RCP9	14.8764	14.5504	14.6124	14.5808	14.8007	14.4647	14.6457	14.8007	14.896	14.6291	14.5971	13.9431	14.4647	14.8509	14.5971	14.8444	14.7763	14.6352	14.7885	14.6179	14.8639	14.4504	14.9071	15.5136	15.079	14.2569	14.7885	14.8132	15.1196	14.3674	14.2698	14.9511	14.5006	14.5658	14.1425	14.7825	13.9842	14.3674	14.7208	15.0989	14.5971	14.2606	15.1803	14.2974	14.8576	14.5057	14.6486	14.8384	13.9363
EEF1G	14.988	15.2849	15.3844	14.964	14.4692	14.7514	14.7956	15.1125	15.3844	14.8576	15.2718	14.9699	15.5513	15.2501	14.896	14.807	14.5808	14.7337	14.576	14.7956	14.4954	15.5833	15.0284	15.1659	14.988	15.2651	14.5109	15.4834	14.4043	15.4366	14.7092	15.022	15.1588	14.9249	14.8203	14.6738	14.3997	15.0406	14.6124	14.2652	15.5668	14.9699	14.8269	15.2788	14.7458	15.3082	14.9371	14.8639	15.1623
LOC643433	15.0468	14.8639	15.1268	15.1803	15.0284	15.0406	15.1125	14.9249	14.9018	15.0012	14.9125	15.0337	14.9071	14.9071	14.6516	14.7763	14.6405	14.8326	14.8639	14.9757	14.8132	15.0666	14.7697	14.7397	14.8269	15.0989	14.7825	15.0284	14.5157	15.0406	15.0666	14.6124	14.8905	15.0337	14.8639	14.657	14.7514	14.8639	15.152	14.2569	15.0284	14.8203	14.807	14.8269	14.6679	15.2651	15.0071	14.7763	14.7697
KLF6	15.2718	14.6235	14.5057	14.9947	14.896	15.5433	15.4912	15.4834	15.6456	15.3153	14.988	15.4	15.3153	15.5513	15.5207	15.887	15.6617	15.507	15.0542	15.7279	15.2651	15.5136	15.4	15.1944	15.2753	15.2788	15.2718	15.1944	14.9572	15.2849	15.2169	15.2849	15.0542	15.1461	15.1732	15.3187	15.14	15.0857	13.911	14.7208	15.2926	14.6235	15.1064	15.1871	14.8384	14.6738	14.4597	14.1464	14.7337
BTG1	14.8132	14.8576	14.7092	14.4954	14.727	14.9316	15.092	14.8203	15.0284	14.9821	14.4647	15.0406	15.092	15.3703	15.2577	14.7825	15.1064	14.8764	15.1732	15.1588	14.9699	15.4295	14.8576	14.922	15.1659	15.4222	14.8933	14.9371	15.0071	15.2436	15.3082	14.4269	14.8007	14.7825	14.6516	14.5057	15.1803	14.6405	14.5006	14.807	14.8203	14.7458	14.4504	14.7514	14.5632	14.8326	14.6913	14.7458	14.5971
LOC347544	14.7514	14.8697	15.2169	15.0284	14.8838	14.9572	14.9947	14.6457	14.8444	15.1944	14.9947	14.764	14.8444	15.0012	14.6913	14.6405	14.6859	14.5429	14.807	15.079	14.657	14.807	14.6291	14.6799	14.8764	15.0284	14.6179	15.0726	14.7092	15.0071	14.9757	14.7337	14.8269	15.0989	14.964	14.5704	14.6235	14.9371	15.1944	14.1587	15.0337	14.3859	14.9018	14.9821	14.9821	15.2232	15.1268	15.0337	14.964
H2AFY	14.5401	14.8007	14.4404	14.4738	14.4903	14.6073	14.4404	14.5865	14.5915	14.6405	14.2099	15.1125	14.8326	14.3571	14.657	14.6026	14.7034	14.5971	14.5401	14.377	14.7697	14.3997	14.576	14.2145	14.4404	14.5254	14.4954	14.5704	14.5057	14.6859	14.8509	14.6352	14.6516	14.3674	14.8576	14.8576	14.5865	14.896	14.3947	15.0726	14.5865	14.7337	14.6625	14.9249	14.4316	14.5704	14.7763	14.5971	15.2019
EEF2	14.9018	15.1659	15.0406	14.8444	14.9249	15.0857	14.9572	15.1944	14.8576	15.1268	15.0605	14.6799	14.9444	14.8269	15.2088	14.6516	14.6235	14.8269	14.7208	14.7092	14.8697	14.9947	14.9371	14.7697	14.8838	14.9947	14.6738	14.8509	14.8838	14.8269	14.4083	14.4903	15.1461	15.1803	15.0143	14.6235	14.3235	15.0542	15.0468	14.3333	15.0574	14.6913	14.8509	14.5401	14.6124	14.8007	14.7574	14.7514	14.8576
VCAN	14.4221	14.7208	14.1014	14.2429	14.4177	14.3144	14.657	14.3622	14.53	14.2698	13.9751	14.7697	14.4903	14.3193	14.4549	14.9249	14.727	14.1088	14.3997	14.5606	14.1053	14.2836	14.7034	13.9503	14.53	13.8248	14.5157	14.1709	14.6179	14.5704	14.1504	14.9125	14.6738	14.3859	14.8444	14.8444	15.0071	14.9316	14.5456	15.4	14.5808	15.2718	13.6669	14.0937	14.4083	14.0775	14.9018	13.8965	15.0666
ARPC2	14.7825	14.9444	14.4647	14.5658	14.5254	14.657	14.576	14.6352	14.5254	14.5352	14.4549	14.8444	14.5254	14.3859	14.5606	14.6291	14.2698	14.5915	14.4127	14.347	14.6859	14.4954	14.4954	14.3674	14.3423	14.7208	14.5401	14.3287	14.4177	14.3235	14.4316	14.7092	14.807	14.6235	15.1196	14.9511	14.9757	14.9821	14.7337	15.1332	14.6516	14.6124	14.6945	14.5971	14.5204	14.6405	14.4903	14.6073	15.0605
S100A6	14.5109	14.5865	14.6352	14.6625	14.8639	14.8905	14.7885	14.4597	14.6738	14.576	14.2145	15.0143	14.1753	14.4177	14.7034	14.4221	14.4795	14.8132	14.5006	14.4316	14.3947	14.3107	15.2926	14.0569	14.4316	13.7875	14.377	14.4851	14.2925	14.5109	14.4903	14.8905	14.5204	14.727	14.4177	14.727	14.3287	14.576	14.6859	14.9947	14.4404	14.3524	14.7514	14.7458	14.5556	14.7825	15.0012	14.7208	15.3003
HLA-DPA1	14.764	14.6516	14.4795	14.9821	14.6516	14.4127	14.1343	14.9371	14.5401	14.764	14.2521	15.5136	14.7458	14.5658	14.377	15.0284	14.5504	14.6978	14.6235	14.9699	14.5057	14.377	14.3423	14.2925	14.5808	14.4738	14.53	14.576	14.657	15.2357	15.0071	14.7155	14.7763	14.6679	14.5456	15.0337	14.7337	15.2926	14.5704	14.7763	14.7885	15.1732	14.4692	15.092	14.5504	15.1659	14.2974	14.6124	14.9947
USP49	14.6405	14.4177	14.3997	14.4043	14.6352	14.347	14.7092	14.7514	14.4647	14.4597	14.3423	14.2227	14.7034	14.7208	14.5658	14.8132	14.988	14.5865	14.6799	14.5865	14.7208	14.9018	14.6405	15.558	15.1803	14.8007	15.0012	14.6738	15.2169	14.53	14.4549	14.8639	14.8203	14.2606	14.3287	14.3376	14.7155	14.3571	14.3168	15.1268	14.6291	14.9371	14.9821	14.4692	13.9292	14.0937	14.0937	14.5401	13.4153
LOC440567	14.7763	14.7825	14.5006	14.53	14.6026	14.6457	14.5109	14.3724	14.5109	14.5504	14.3571	14.6457	14.4954	14.3287	14.5401	14.5352	14.5401	14.6405	14.4597	14.7397	14.5704	14.6352	14.4043	14.235	14.3859	15.14	14.4358	14.5006	14.3235	14.5254	14.8269	14.4504	14.8326	14.5006	14.9316	14.4954	15.2357	14.8132	14.6978	14.9249	14.7697	14.9821	14.3859	14.7092	14.347	14.5556	14.5057	14.6913	14.5658
CDC37	14.6179	14.6124	14.8764	14.8132	14.9071	14.8007	14.6405	14.6799	14.5971	14.4903	14.7697	14.6679	14.5808	14.5109	14.4692	14.4851	14.402	14.4316	14.4504	14.4692	14.6516	14.4795	14.5157	14.6516	14.5352	14.8203	14.6405	14.6124	14.5865	14.727	14.7034	14.6859	14.4504	14.9821	15.092	14.6291	14.3882	14.4316	14.7956	14.3905	14.6235	14.4221	14.7397	14.9018	14.6859	14.8384	14.9071	15.0143	14.7208
TMEM66	14.9511	14.9249	14.8326	14.5456	14.5352	14.7458	14.7397	14.7885	14.7697	15.1125	14.4954	14.7155	15.1064	14.6291	14.964	14.7337	15.0107	14.896	14.8326	14.988	14.5865	15.079	14.8905	14.8203	14.8576	15.2232	15.0542	14.8444	14.8639	14.8576	15.1659	14.5456	14.8838	14.4221	14.6978	14.5556	15.092	14.8444	14.6179	14.4083	15.0666	14.9249	14.6026	14.807	14.5971	14.3571	14.5109	14.6235	14.4455
LOC648343	15.3703	14.9125	15.0989	14.9125	14.7956	14.7825	14.9444	14.896	15.1064	15.2577	15.092	15.1588	14.7697	14.6625	14.7763	14.6625	14.9511	14.7155	14.5254	15.0406	14.8384	15.1659	14.8838	14.8384	15.1461	15.0406	14.6124	14.964	14.9249	15.0726	15.2019	15.0468	15.3807	14.6179	15.1554	14.4404	15.0406	14.9249	15.3495	14.2184	15.0989	14.8905	15.0406	15.1803	13.8073	14.8444	14.576	15.0989	14.8132
ZFP36	14.4177	14.2788	14.0321	14.3144	14.0429	15.392	15.2926	15.2539	15.507	15.0468	14.8269	15.4985	15.0284	15.5833	15.6694	15.7496	15.5352	15.4513	15.7587	15.695	15.614	15.7354	15.8144	15.2849	15.3625	15.4513	15.4912	15.558	15.3363	15.5756	15.4754	15.4513	15.0666	14.6978	14.5556	14.919	14.4083	14.6978	13.6537	14.2925	14.3622	14.896	13.9543	15.4366	14.8639	14.3018	14.5401	13.893	14.727
RAC2	14.6457	14.5401	14.4043	14.6516	14.6405	14.377	14.2974	14.377	14.4795	14.7458	14.6124	14.6738	14.1425	14.3235	14.3235	14.6457	14.3193	14.5109	14.2745	14.3724	14.5109	14.1587	14.3333	13.7875	14.4127	14.2227	14.0973	14.2698	14.1014	14.2925	14.3287	14.6291	14.4043	14.7514	14.5865	14.5157	14.4903	14.7397	14.5915	14.4692	14.6913	14.2974	14.6405	14.7956	14.764	14.7337	14.6978	14.6179	15.1332
DUXAP3	14.6321	14.5204	14.4269	14.3674	14.7825	14.5109	14.5971	14.6859	14.6026	14.3674	14.4851	13.9468	14.1053	14.6799	14.7092	14.9444	14.9572	14.6457	14.7397	14.6457	15.0989	14.5204	14.8444	15.4595	15.092	14.3815	14.8933	14.7092	15.1461	14.2099	13.8105	14.8203	14.7574	14.4597	13.9915	14.3193	14.4221	14.2652	14.3571	15.0406	14.3235	14.6405	14.9125	13.9804	14.3815	14.1425	14.0159	14.5456	13.5132
BTF3	14.5556	14.8838	14.7155	14.5704	14.5658	14.6799	14.4549	14.6124	14.7956	14.9757	14.576	14.7763	14.8697	14.7155	14.5704	14.5401	14.7574	14.7034	14.7514	14.7825	14.6179	14.7697	14.5971	14.5865	14.7825	14.9511	14.6799	14.8905	14.8905	14.6679	14.8905	14.3571	14.7208	14.5456	14.4316	14.9572	15.1125	14.8764	14.6625	14.6352	14.6625	14.5556	14.4851	14.6073	14.7697	14.6026	14.7208	14.5254	14.6625
LOC643949	15.0726	14.8269	15.4595	14.7697	15.0542	14.9757	14.7458	14.7034	15.0406	15.0337	15.0857	14.3674	14.6625	14.8007	14.7885	14.8007	14.9249	14.6799	14.6679	15.0542	14.9071	14.6405	14.7397	15.2019	15.2357	14.5704	14.5606	15.2232	15.1732	14.5504	14.7337	14.964	15.0143	14.8764	14.4692	14.4738	14.4795	14.7956	15.0857	14.0281	15.1944	14.3947	14.6543	14.4358	14.5157	14.8576	15.0605	14.807	14.4597
CD52	14.6124	14.5704	14.6457	14.7092	15.0605	14.7697	14.7208	14.5971	15.1196	14.9444	14.6179	14.4269	14.347	14.764	14.7397	14.4903	14.5204	15.1461	14.9018	14.7337	14.3859	13.922	14.7092	14.3947	14.7574	14.5915	14.3724	14.6799	14.5109	14.6179	14.5006	14.4692	14.576	14.988	13.9184	14.9821	14.3815	14.1875	14.9071	15.0012	14.9757	14.055	14.9316	14.3815	14.2007	14.8764	14.9757	15.0406	15.2849
RGS2	14.4954	14.4647	13.9617	13.9994	14.1464	14.6352	14.6073	14.9316	14.4269	14.1671	14.0813	14.7885	15.0337	14.5006	15.2019	14.9572	14.919	14.5157	14.3815	14.9444	14.4738	14.7034	14.8509	14.5971	14.3674	14.8509	14.8326	14.7825	15.022	14.8384	14.8007	14.3235	14.3905	14.4269	14.5606	14.8132	15.2019	14.7763	13.3028	14.9018	14.5006	15.4078	13.814	15.3291	15.152	13.7328	14.9249	13.5597	14.5808
LOC643007	15.1268	14.5352	15.0337	14.5865	14.807	14.7956	14.7574	14.7155	14.657	14.727	14.6738	14.3287	14.4851	14.347	14.6291	14.657	14.9125	14.5352	14.5109	14.7034	14.6978	14.7763	14.3815	14.4083	14.896	14.7825	14.4903	14.5157	14.5254	14.4954	14.657	14.9316	15.3495	14.5109	14.6913	14.1464	14.6026	14.4647	14.9699	13.8713	14.6859	14.9947	14.7034	14.8838	14.6625	14.9125	14.807	14.7337	14.7574
PABPC1	14.5057	14.8764	14.964	14.8509	14.7034	14.7367	14.5658	14.807	14.6913	14.8007	14.6978	14.4455	15.0143	14.7397	14.6799	14.7034	14.7092	14.727	14.764	14.7763	14.727	14.7458	14.7514	14.8326	14.6026	14.9757	14.8269	14.7514	14.6859	14.7514	14.6625	14.6235	14.5556	14.8697	14.5915	14.9757	14.727	14.9071	14.8838	14.4954	14.9511	14.4083	14.5254	14.227	14.5254	14.4597	14.3997	14.6738	14.5204
LOC647673	14.9071	14.6625	14.9125	14.4692	14.4455	14.3648	14.4221	14.5504	15.2436	15.1659	14.7397	14.5109	14.6352	14.988	14.7458	14.5556	14.8576	14.7574	14.9071	14.8509	14.3423	14.6978	14.4851	14.6913	14.8668	14.7034	14.589	14.9018	15.079	14.9821	14.9071	14.6073	15.0857	14.4043	14.2925	14.5352	14.4177	14.6679	15.2436	14.1791	14.964	14.5401	14.2875	14.727	14.9371	14.9316	14.919	14.7825	14.8384
LOC649821	14.7697	14.8326	14.9757	14.8326	14.8697	14.8509	14.7763	14.8697	14.5808	14.9572	15.0337	14.7092	14.919	14.7458	14.4083	14.7956	14.764	14.6679	14.8444	15.0989	14.7763	14.8444	14.8132	14.7825	14.8132	14.6913	15.079	15.2501	14.6738	14.4738	14.9371	14.5352	14.7825	14.8132	14.6457	14.9018	14.7825	14.8384	15.1623	14.3423	14.8509	14.3622	14.988	14.1753	14.5632	15.0071	14.4455	14.8838	14.6352
GAPDH	14.3859	14.5808	14.3062	14.5006	14.3815	14.5556	14.6679	14.4903	14.2569	14.4221	14.6625	14.8905	14.2745	14.5254	14.347	14.5504	14.1219	14.4647	14.3859	14.4381	14.4127	14.1671	14.5204	14.1053	14.2652	14.6457	14.5456	14.3524	14.2836	14.7956	14.4358	14.3144	14.227	14.6516	14.6679	14.8801	14.3144	14.6457	14.6291	14.7337	14.3524	14.5504	14.1299	14.4404	14.5352	14.4504	14.7514	14.4316	14.9444
CD44	14.657	14.6405	14.5704	14.727	14.3997	14.5401	14.4083	14.5915	14.4954	14.6352	14.4358	14.8639	15.022	14.3062	14.6073	14.4127	14.5606	14.6124	14.3018	14.5704	14.3144	14.6913	14.4083	14.2099	14.4455	14.7337	14.2974	14.5057	14.6291	14.5971	14.5606	14.7885	14.7956	14.4549	14.6799	14.7885	14.1875	14.8576	14.4954	14.896	14.7155	15.1125	14.4316	14.5865	14.3107	14.3859	14.5606	14.5352	15.14
C1orf162	14.4316	14.2629	14.2569	14.5352	14.5401	14.1835	14.1921	14.2227	14.0036	14.3423	14.4269	14.896	14.4269	13.7581	13.9693	14.3859	14.1388	14.3947	14.1921	14.2122	13.9879	13.9399	14.113	13.673	14.2145	13.6381	13.911	14.1219	14.1262	14.235	14.5254	14.807	14.3144	14.5352	14.4738	14.5109	14.4647	14.6516	14.657	14.8203	14.5606	14.7397	14.5401	14.7155	14.8444	14.7885	14.9821	14.4647	15.152
HSP90AA1	14.8203	14.5915	14.4316	14.2652	14.3524	14.53	14.5352	14.5456	14.4692	14.4954	13.8791	14.196	14.6978	14.4221	14.7825	14.3376	14.5456	14.7208	14.5504	14.5504	14.5006	14.7885	14.3622	14.3997	14.4692	14.8639	14.3947	14.377	14.3859	14.4404	14.6516	14.4404	14.7514	14.4795	14.8007	14.5006	14.5401	14.6738	14.5606	14.6026	14.7763	14.964	14.3674	15.0012	14.4455	14.727	14.6799	14.8326	14.7956
COX6C	14.7397	14.7034	14.7337	14.6235	14.7458	14.6026	14.4851	14.4504	14.6352	14.6625	14.5915	14.3524	14.4597	14.6738	14.4597	14.4504	14.4954	14.4795	14.5456	14.5157	14.576	14.3018	14.6352	14.5401	14.7337	14.4851	14.5057	14.6978	14.6073	14.5057	14.576	14.6457	14.377	14.5704	14.3622	14.6073	14.4692	14.4127	14.7885	14.5971	14.5915	14.1504	14.7574	14.3524	14.6073	14.6352	14.5006	14.6457	14.4549
ANP32B	14.727	14.7885	14.8007	14.5157	14.4127	14.576	14.4738	14.7208	14.5865	14.8905	14.3947	14.5808	15.0605	14.4504	14.4504	14.5204	14.6978	14.6913	14.5658	14.6679	14.5971	14.9757	14.4358	14.3571	14.4358	15.079	14.5704	14.727	14.5556	14.657	14.919	14.5254	14.764	14.4954	14.7337	14.3724	14.7697	14.5504	14.6913	14.4177	14.7337	14.7155	14.4177	14.6026	14.7397	14.4647	14.377	14.5865	14.657
LOC652624	14.8697	14.7337	15.0857	15.0666	14.7337	14.964	14.919	14.8576	14.7514	15.2788	15.0989	14.964	14.8576	14.8132	14.5006	14.4692	14.4851	14.6516	14.657	14.9316	14.7337	15.0337	14.6625	14.5157	14.8444	15.152	15.0284	14.8639	14.5204	14.9444	15.0542	14.2521	14.7397	14.9071	14.7092	14.5606	14.3524	14.727	15.4078	14.0506	15.2577	14.2307	14.5352	14.7208	14.6978	15.0666	14.8697	14.8697	14.4504
YWHAB	14.5352	14.3287	14.3524	14.3815	14.5556	14.1921	14.3724	14.1388	14.3018	14.2974	14.1014	14.5157	14.7208	13.8073	14.1014	14.117	14.0506	13.821	13.7875	13.9693	14.235	13.8861	14.07	13.7038	13.9399	14.4404	13.9562	13.9915	14.1299	14.227	14.3062	14.6738	14.7458	14.2788	14.727	14.3859	14.8576	14.807	14.4795	14.764	14.4083	14.6625	14.4549	14.8444	14.117	14.5658	14.6625	14.7697	15.0542
PTP4A2	14.6026	14.9018	14.5808	14.6179	14.6799	14.4954	14.5204	14.9018	15.0071	14.8639	14.3674	14.8269	14.9249	14.6859	14.7337	14.7885	14.7458	14.964	14.7092	14.7885	14.5915	14.6859	14.4221	14.6859	14.5057	14.6405	14.8132	14.6026	14.7885	14.4647	14.5352	14.0036	14.6179	14.6124	14.4647	15.0012	14.4954	14.7034	14.5504	14.5556	14.5057	14.5915	14.3905	14.024	14.4954	14.4083	14.1504	14.3423	14.347
NDUFA1	14.6321	14.6799	14.7034	14.4597	14.6291	14.5157	14.5006	14.2099	14.3674	14.6679	14.6235	14.7825	14.6516	14.5456	14.6026	14.4795	14.4549	14.6738	14.6291	14.5204	14.6405	14.4549	14.4504	14.117	14.4903	14.896	14.5204	14.6179	14.53	14.5157	14.7885	14.4358	14.5971	14.53	14.5109	14.7458	14.6291	14.6799	14.7092	14.4127	14.6026	14.2875	14.5808	14.5006	14.2606	14.5836	14.2652	14.727	14.764
HSD17B7	14.3376	14.2227	14.0973	14.2053	14.6978	14.2521	14.4043	14.576	14.3376	14.1219	14.3376	14.4043	14.8509	14.6179	14.6235	14.6179	14.8838	14.5057	14.6073	14.4043	14.5808	14.8132	14.6516	15.5433	14.9572	14.9444	14.6352	14.5632	15.1332	14.4177	14.6026	14.4083	14.5915	14.3947	14.347	14.2053	15.3082	13.9	14.0036	14.8764	14.09	15.392	14.8639	14.3622	14.0973	13.8791	13.8316	14.2521	12.9812
CAP1	14.3423	14.4738	14.1544	14.3107	14.196	14.0201	14.024	14.1425	14.2476	14.3571	14.2745	14.5971	14.3235	14.0588	14.1632	14.4647	13.9363	14.3144	14.1053	14.2429	13.9144	13.8605	13.8755	13.7676	14.0429	14.2698	13.9034	13.9	14.1921	14.2698	14.2227	14.5971	14.2521	14.2652	14.3423	14.6625	14.6859	14.5865	14.5254	14.9444	14.4358	14.7697	14.4903	14.7885	14.3947	14.6073	14.53	14.4269	14.9757
NEDD8	14.3571	14.4795	14.5401	14.6049	14.7208	14.5915	14.6625	14.4549	14.3859	14.4692	14.5865	14.6516	14.4504	14.2145	14.3905	14.5006	14.2788	14.4954	14.3107	14.5109	14.4404	14.07	14.4738	14.0489	14.4177	14.4316	14.2227	14.3333	14.1753	14.4358	14.5808	14.7034	14.4795	14.5971	14.5704	14.576	14.4269	14.4903	14.6516	14.5606	14.5456	14.5277	14.3423	14.6978	14.5865	14.7155	14.7034	14.5057	15.022
SMAP2	14.1299	14.3423	14.2652	14.3947	14.4404	14.2606	13.911	14.2788	14.2698	14.4795	14.53	14.5204	14.6291	13.8569	13.9252	14.1464	14.3062	14.0813	14.1587	14.3018	14.2053	14.0856	14.2007	13.8392	14.4795	14.1587	14.0321	14.2053	14.227	14.7092	14.3193	14.5704	13.8316	14.4177	14.1088	14.227	14.0588	14.3724	14.3062	14.8576	14.4269	14.0363	14.3193	14.657	14.7825	14.6859	14.9511	14.5556	14.7155
LOC648210	14.6913	14.7763	14.727	14.6457	14.3571	14.3524	14.2745	14.6235	14.8326	14.964	14.2053	15.092	15.0666	14.7514	14.5109	14.3423	14.6026	14.4549	14.6978	14.896	14.4316	14.9316	14.4177	14.5504	14.7514	15.3495	14.5658	14.9821	14.5456	15.1588	15.4222	14.1544	14.5704	14.3622	14.6179	14.807	14.3622	14.6625	14.7458	14.3674	15.0012	14.5352	14.4083	15.2718	14.9071	15.0143	14.8444	14.7092	15.2088
PTBP1	14.5704	14.5606	14.657	14.6291	14.6913	14.5658	14.4127	14.4127	14.1921	14.3859	14.5606	14.4597	14.764	14.3376	14.4043	14.4549	14.4177	14.4221	14.3905	14.3905	14.3333	14.4177	14.3571	14.3524	14.3997	14.807	14.4738	14.3905	14.2652	14.6913	14.1464	14.3333	14.5606	14.657	14.9699	14.53	13.7809	14.5057	14.4597	14.2788	14.6405	14.347	14.7155	14.5704	14.3622	14.5006	14.6235	14.6978	14.7514
MYH9	14.4795	14.5057	14.2307	14.5606	14.2745	14.1753	14.1219	14.3571	14.3724	14.6738	14.347	14.6291	14.5204	14.1544	14.0973	14.024	14.1262	14.1053	13.9252	14.09	13.8122	14.2698	13.9693	13.9292	14.2521	14.6516	14.1791	14.1464	14.235	14.2606	14.3235	14.1088	14.7885	14.4358	14.9071	14.5204	14.9125	14.6352	14.3674	14.9071	14.8132	14.4316	14.1544	14.5157	14.377	14.0201	14.2745	14.1671	14.2053
DEFA1	12.5738	15.716	14.6179	15.9631	13.6758	16.0268	17.0125	14.53	13.4257	12.0849	13.8755	11.2864	11.1426	14.807	15.5668	12.8188	12.7096	13.4007	12.8918	14.8639	12.6635	12.0398	14.657	12.928	12.6235	14.2812	14.8444	13.0298	14.6124	16.5762	14.4597	13.3572	14.5865	13.1854	16.3606	15.8544	14.3882	15.9472	13.3446	15.7983	13.5234	15.3003	13.7659	13.9915	13.5064	13.5064	16.1898	13.6669	11.4406
HLA-DMB	14.5456	14.5006	14.1835	14.5504	14.6124	14.3648	14.0856	14.5556	14.4083	14.4647	14.0396	15.1803	14.657	14.1343	14.2745	14.5704	14.53	14.5704	14.2788	14.6235	14.2974	14.1299	14.3524	14.0973	14.3062	14.1791	14.3376	14.1425	14.4221	14.6026	14.1343	14.5865	14.4083	14.4738	14.5157	14.6978	14.4381	14.8509	14.4647	14.4549	14.6799	14.3905	14.3144	14.9572	14.5704	14.964	14.6405	14.0281	14.807
RHOA	14.2925	14.5971	13.9804	14.2184	14.1835	14.4083	14.1425	14.5006	14.2652	14.377	14.2569	14.5456	14.3107	14.196	14.4851	14.6859	14.5556	14.5808	14.3571	14.5658	14.2652	14.6026	14.1835	14.1709	14.3333	14.3524	14.4549	14.0856	14.4316	14.1921	14.3859	14.2875	14.919	14.2307	14.4455	14.6352	14.6913	14.7458	14.0281	14.7155	14.3947	14.8384	14.3018	14.3235	14.4269	14.1875	14.3423	14.3622	14.7885
PCBP1	14.2652	14.5109	14.4504	14.4549	14.2788	14.3724	14.2698	14.2745	14.4358	14.5556	14.5057	14.4795	14.2429	14.3333	14.4404	14.3947	14.3622	14.4177	14.3235	14.5556	14.4083	14.2099	14.2836	13.821	14.2875	14.1671	14.0813	14.3724	14.377	14.4903	14.4692	14.5808	14.3947	14.3423	14.3085	14.4043	14.2745	14.4455	14.347	14.5057	14.4177	14.2836	14.2521	14.4043	14.7574	14.4358	14.7458	14.4851	14.8444
LOC90586	14.5658	14.1388	14.3144	14.3571	14.3622	14.1053	14.2652	14.5606	14.1425	14.227	14.2925	14.0506	14.5606	14.657	14.3622	14.6235	14.6291	14.2145	14.6179	14.3674	14.7574	14.6291	14.4647	15.2577	14.7208	14.5865	14.7034	14.3859	14.8697	14.2145	14.3144	14.8384	14.3524	14.1875	14.196	13.9842	14.5556	13.6744	14.1671	14.7885	14.0813	14.8764	14.9511	14.4127	14.3905	14.0506	13.9328	14.5606	13.0298
SLC25A5	14.5606	14.657	14.5352	14.5057	14.4795	14.4177	14.227	14.6913	14.6859	14.5109	14.4127	14.8384	14.7337	14.377	14.5204	14.5109	14.5704	14.6235	14.6859	14.6352	14.3815	14.4851	14.377	14.1504	14.5658	14.6625	14.589	14.3815	14.3815	14.5401	14.6978	14.4647	14.6405	14.5157	14.5971	14.7763	14.5504	14.764	14.4127	14.3524	14.4954	14.7956	14.2836	14.7034	14.1875	14.5915	14.4738	14.347	14.6516
DDX5	14.8639	14.6073	14.4738	14.5971	14.3674	14.4269	14.3815	14.657	14.6625	14.8132	14.3193	14.9757	15.1125	14.3724	14.1753	14.4316	14.2227	14.3107	14.3423	14.2122	14.1343	14.9125	14.5352	14.5109	14.6859	14.8905	14.807	14.4738	14.3524	14.5808	14.7155	14.2053	14.53	14.6738	14.6235	14.5865	14.6405	14.6859	14.5808	14.5658	14.988	14.7574	14.2053	14.6738	14.3674	14.4221	14.3815	14.4903	14.3193
LOC158345	14.9572	14.8509	14.8444	14.8203	14.6073	14.7208	14.6179	15.0406	14.8269	15.092	14.7514	14.3571	15.152	14.6405	14.6625	14.2388	14.6073	14.5429	14.5606	14.9018	14.5456	14.7208	14.6124	14.4795	14.6405	14.9249	14.964	14.988	14.4738	14.7337	15.0955	14.5658	14.8576	14.8384	14.53	14.5915	14.117	14.4404	14.8509	14.2521	15.1125	14.2476	14.2145	14.6516	14.3062	14.7397	14.6179	14.6291	14.1014
PSMB10	14.4504	14.3815	14.4692	14.7514	14.8444	14.4738	14.4455	14.2476	14.0114	14.2812	14.4738	14.6026	14.1299	14.0136	14.0472	14.2184	14.1791	14.5556	14.1709	14.1875	14.3193	13.7743	14.1921	13.6138	14.0074	14.0281	13.9915	14.0036	14.0506	13.7942	14.113	14.5556	14.196	14.6859	14.4954	14.4597	14.2698	14.3524	14.6457	14.4795	14.2053	14.0472	14.6543	14.6799	14.3333	14.8269	14.8203	14.5808	14.8905
LOC387867	14.6073	14.5157	15.0542	15.022	14.764	14.807	14.727	14.7956	14.6457	14.9947	15.0012	14.8576	14.988	14.8838	14.4903	14.2698	14.3674	14.4738	14.4903	14.7208	14.4177	14.8764	14.5915	14.5915	14.4269	15.2019	14.8576	14.8576	14.5915	14.9511	14.896	14.3859	14.6352	14.9699	14.8269	14.377	14.4597	14.5606	15.3844	13.8791	15.0468	13.9693	14.5157	14.6124	14.6457	14.988	14.7397	14.8132	14.3144
CD48	14.576	14.4851	14.6516	14.6049	14.576	14.4504	14.5456	14.6026	14.6235	14.5401	14.3859	14.2745	14.3548	14.3423	14.4455	14.4597	14.4647	14.4043	14.4851	14.4903	14.1753	14.3287	14.2698	14.3144	14.5157	14.1921	14.2875	14.3107	14.2974	14.196	14.2836	14.6679	14.6799	14.576	14.3571	14.5456	14.2184	14.4221	14.6738	14.4851	14.6124	14.4455	14.5057	14.3018	14.1262	14.7034	14.7092	14.6625	14.8838
HCG2P7	14.5157	14.6913	14.3571	14.4795	14.5808	14.2836	14.3997	14.4738	14.2053	14.1791	14.235	14.4177	14.2606	14.5865	14.6352	14.4738	14.7208	14.6291	14.4083	14.0662	14.5606	14.5109	14.6913	15.1268	14.9316	14.2307	14.3107	14.5865	14.9018	14.1388	14.024	14.896	14.5504	14.4692	14.055	14.0856	15.2718	13.7643	14.1053	14.8639	14.3859	14.8509	14.6179	13.4445	13.0651	14.377	13.6537	14.0396	12.7455
HLA-F	14.4404	14.5658	14.6405	14.7397	14.6625	14.6978	14.4692	14.3018	14.377	14.7208	14.7155	14.7208	14.1835	14.727	14.3947	14.7155	14.4269	14.3193	14.4455	14.2974	14.4358	14.1921	14.3235	14.6124	14.4851	14.1014	14.4692	14.4455	13.9994	14.7885	14.3947	14.1632	14.3193	14.6625	14.7697	14.8326	14.1632	14.1921	14.6679	14.4903	14.4597	13.5373	14.8007	14.4549	14.2429	14.7208	14.5658	14.7397	14.8007
C20orf24	14.2145	14.347	14.2227	14.235	14.3859	14.227	14.1709	14.1343	14.4043	14.1053	14.1875	15.1659	14.4738	14.0813	14.117	14.1671	14.0856	14.1921	14.3062	14.235	14.3524	14.0626	13.8897	13.6021	14.0363	14.4504	14.0775	13.9842	14.2184	14.055	14.3571	14.5006	14.2974	14.2099	14.6859	14.5504	14.8384	14.5157	14.2429	14.6978	14.2408	14.6516	14.1632	14.5658	14.4692	14.3062	14.6073	14.4083	14.5606
ANXA2P1	14.2788	14.3018	13.8174	13.8897	13.9915	14.0159	13.9543	14.3062	14.1835	14.0588	14.0321	14.5057	14.3018	13.7328	14.3524	14.3193	14.4404	14.3423	14.0201	14.0281	13.7105	14.1388	14.0736	13.4954	13.9543	13.7676	14.1425	13.8423	14.2521	14.2875	14.3333	14.6625	14.5658	14.0201	14.3997	14.3235	14.5254	14.5971	14.0159	14.9699	14.2476	14.764	14.0973	14.377	14.024	14.2925	14.5352	14.2307	14.7458
LOC644511	14.6516	14.6352	15.2088	14.7337	14.7514	14.7367	14.3524	14.3997	14.807	15.0143	14.8007	14.576	14.6738	14.919	14.576	14.3571	14.4083	14.53	14.7034	14.727	14.5504	14.6738	14.4404	14.9125	14.657	14.7397	14.1921	14.6516	14.7825	14.6516	14.7458	14.1921	14.5808	14.7208	14.5057	14.5401	14.1504	14.4954	15.3558	13.8357	14.8384	14.2227	14.4738	14.3062	14.3571	14.9444	14.7956	14.8444	14.5915
NBPF10	14.9444	14.9821	14.3724	13.1501	13.4231	13.253	13.9034	13.3395	14.576	14.3815	14.7763	14.1388	14.9316	14.6235	14.1088	14.1014	13.9769	13.9543	13.8285	13.771	14.5204	14.727	13.2437	15.022	14.1791	14.7458	14.2007	14.4083	15.0143	14.2974	14.3905	14.7956	14.6026	13.3546	14.7956	14.7697	15.0726	15.1268	14.807	15.4366	14.9444	13.3273	14.8576	13.8073	13.5431	13.9034	14.1464	14.988	14.1053
MRCL3	14.6625	14.7397	14.0588	14.7574	14.1671	14.0036	13.9617	14.4083	14.0363	14.1544	14.055	13.8897	14.0159	13.6381	14.3997	13.7609	14.2925	14.1632	13.8174	14.2307	13.9076	14.1088	14.1544	13.4572	14.0856	13.9653	13.9733	13.6943	14.3062	13.3648	13.9769	13.9468	15.3363	14.1835	14.2745	14.2184	15.4513	15.0071	14.3107	14.9125	14.7956	15.079	13.8073	13.8316	13.9076	14.227	13.9693	14.4795	14.2388
LOC644250	14.4597	14.3193	14.4549	14.2875	14.3193	14.2145	14.4316	14.4795	14.4504	14.3018	14.2836	14.0937	14.1671	14.4597	14.1791	14.3905	14.576	14.2569	14.5556	14.2569	14.5352	14.3376	14.6235	14.8905	14.6799	14.2429	14.7337	14.5504	14.727	14.2788	13.9399	14.7574	14.0506	14.2053	14.2227	14.1709	13.8174	13.6202	14.1875	14.6516	14.2007	13.6881	14.7208	14.117	14.2925	14.2652	14.2788	14.3724	13.3572
IFITM2	13.7328	14.0472	13.3674	13.7875	13.7609	13.9	14.2307	13.8569	14.4903	13.4731	14.727	14.3193	13.67	13.6943	13.8791	14.5865	14.3815	14.7697	13.8105	13.7907	14.1194	13.3473	14.5704	13.1986	13.9994	12.5707	13.4495	14.0363	13.3273	13.3876	14.6179	14.4316	13.3982	14.1504	13.7581	14.3062	15.2436	13.8461	13.4231	14.2145	13.2214	12.9561	14.7337	14.5556	15.4595	14.53	14.2476	14.1388	15.1461
CFD	14.4692	14.4063	13.9431	14.3997	14.6179	13.8357	14.6235	13.8496	14.6405	13.6108	14.3815	14.988	13.2181	14.235	13.893	14.964	13.9431	14.3571	14.024	14.2184	14.1544	14.0429	15.079	13.7006	14.2099	13.0298	14.2606	14.0937	14.196	13.2268	13.8392	14.7208	13.6635	14.1053	14.235	14.1671	14.196	14.6073	14.0396	14.8384	13.8073	13.5516	14.896	14.2227	15.4153	14.9947	15.022	13.864	14.2521
FGR	13.9328	14.2745	13.6503	14.3062	14.3144	14.1709	13.8983	14.1544	13.3827	13.8392	14.0937	14.3107	14.117	13.8861	14.055	14.2652	14.2099	14.2184	14.0363	13.9399	14.3062	13.5737	13.9581	13.6202	13.7412	13.1967	13.8248	13.7512	13.9431	13.9399	13.821	14.5504	13.9653	14.2476	14.4043	14.3144	13.814	14.6026	13.9617	14.9316	13.6785	14.2521	14.4597	14.3144	14.0074	14.2099	14.5865	14.3287	15.092
COMMD6	14.6738	14.4549	14.9371	14.6405	14.8269	14.7155	14.4504	14.5057	14.6124	14.7956	14.657	14.3947	14.4127	14.5808	14.2974	14.347	14.4504	14.4083	14.3193	14.6291	14.377	14.4127	14.5658	14.3423	14.5456	14.5109	14.3905	14.7034	14.4404	14.6124	14.5109	14.4455	14.5254	14.6913	14.3724	14.2606	14.53	14.5556	14.988	13.9733	14.6179	14.0736	14.4795	14.1262	14.0396	14.2388	14.3193	14.6405	14.2925
EIF1	14.6235	14.8132	14.7956	14.7034	14.3905	15.092	15.1659	15.1268	15.4222	15.1803	14.7825	15.2357	15.0071	15.4295	15.0372	15.1659	14.964	15.022	15.1125	15.2169	15.092	15.2718	15.0337	15.3436	15.0542	15.3436	15.4595	15.1332	14.9757	15.0666	15.4441	14.3107	14.6625	14.8269	14.6405	15.3003	14.6799	14.7337	14.2698	13.691	14.7574	14.5865	14.5504	14.2521	14.9249	14.0429	13.7942	13.5652	13.9328
LOC402694	14.5915	14.6026	14.7514	14.6859	14.498	14.9371	14.8007	14.5204	14.6978	14.7514	14.6291	14.3997	14.4358	14.576	14.727	14.4404	14.3571	14.576	14.53	14.5456	14.7092	14.4043	14.6859	14.4358	14.6738	14.576	14.3144	14.4954	14.3193	14.4043	14.1921	14.3947	14.4269	14.6073	14.3524	14.3997	14.1464	14.6291	14.9125	14.1088	14.7034	14.1088	14.7458	14.1587	14.2053	14.7697	14.4316	14.4404	14.4316
TALDO1	14.1388	14.3622	13.911	14.2007	14.2184	14.1791	14.1014	14.1262	13.9431	13.9842	14.2652	14.3018	14.1262	13.738	14.2145	14.0396	13.7232	13.7232	13.8965	13.9468	14.1709	13.9804	13.9733	13.8073	13.67	13.5652	14.0201	13.8248	14.1671	14.2569	14.1219	14.576	13.8825	14.2745	14.3859	14.4795	14.0321	14.3815	14.3333	13.7074	14.117	14.3815	13.6943	14.3333	14.9125	14.2836	14.8639	14.0856	14.5865
LOC285900	14.7155	14.7697	14.7825	14.8384	14.6679	14.6913	14.4795	14.7574	14.4851	14.807	14.4043	14.2698	14.3674	14.3815	14.6179	14.3997	14.3287	14.4127	14.4647	14.6799	14.6352	14.3193	14.4549	14.4954	14.6235	14.4083	14.6625	14.7458	14.4647	14.4549	14.2652	14.4795	14.8384	14.6291	14.3193	14.2007	14.227	14.6235	14.9371	14.1464	14.7514	14.0856	14.3947	14.0856	14.1464	14.5401	14.5504	14.7155	14.5006
PSME1	14.4851	14.5556	14.2875	14.2388	14.1343	14.1875	14.0321	14.2521	14.3524	14.3376	14.3107	14.4504	14.5658	14.1632	14.3287	14.3235	14.3905	14.3997	14.2388	14.3859	14.227	14.1053	13.8529	14.0201	14.2606	14.6738	14.2788	14.1014	14.0662	14.2521	14.4738	14.2698	14.5352	14.2875	14.3674	14.6026	14.7034	14.5352	14.2974	14.2836	14.5352	14.3287	14.3622	14.4455	14.3376	14.6799	14.3571	14.1014	14.8269
EMP3	14.2588	13.9653	14.3287	14.1791	14.3724	14.2307	14.1053	13.8174	14.5504	14.4043	14.5808	14.6179	14.024	14.2227	14.1464	14.6352	14.2007	14.5254	14.3333	14.4083	14.3724	14.1343	14.2652	14.0429	14.1671	13.8461	14.1053	14.6235	14.117	14.2429	14.3997	14.5204	13.9399	14.2388	14.4597	14.4549	14.4316	14.0813	14.4404	14.117	14.1921	14.113	14.7956	14.1544	14.5057	14.6291	14.6026	14.6352	14.8764
TUBA1A	14.2289	14.2836	14.4127	14.576	14.1544	14.3571	14.4647	14.5658	14.5057	14.3997	14.7034	14.4851	14.2974	14.4358	14.4269	14.5157	14.402	14.4504	14.227	14.4177	14.1299	14.0775	14.4316	14.2606	14.2429	14.6679	14.4316	14.0281	14.3144	14.3524	14.2875	14.6179	14.4429	14.3287	14.3333	14.6124	14.1921	14.3622	14.3376	14.1219	14.2569	14.1791	14.5556	13.9617	14.7885	14.3376	14.196	14.3905	14.5456
MSN	14.4083	14.3724	14.1587	14.2925	14.4083	14.2788	14.2521	14.1014	14.2227	14.3287	14.4316	14.7397	14.4316	14.2476	14.196	14.2606	14.0813	14.3062	14.0736	14.2227	14.1921	14.2925	14.0813	14.2476	14.1632	14.3376	14.0396	13.9804	14.113	14.5915	14.7208	14.1014	14.3333	14.3018	14.4903	14.4504	14.764	14.6179	14.2836	14.3018	14.235	14.4738	14.1464	14.3724	14.0159	14.2974	14.4043	14.0626	14.5254
ATP6V0E1	14.2289	14.1262	14.0201	14.2145	14.53	13.7907	13.7844	13.5516	13.9184	13.8605	14.1299	14.4083	13.9617	13.5146	13.6051	13.8529	13.657	13.8713	13.5431	13.6785	13.7353	13.5913	13.67	13.2957	13.554	13.6758	13.5009	13.4104	13.8529	13.7512	13.9581	14.4851	14.2606	14.3905	14.3905	14.115	14.5109	14.4597	14.4316	14.5808	14.227	14.4903	14.347	14.6625	14.3724	14.4903	14.657	14.5658	14.6738
LOC440737	14.6799	14.7514	14.8697	14.2745	14.3947	14.6235	14.3333	14.1504	14.6799	14.8269	14.7208	14.1504	14.3548	14.5556	14.8203	14.4269	14.5971	14.764	14.5057	14.657	14.5254	14.53	14.2145	14.6457	14.7697	14.4795	14.0074	14.7208	14.7208	14.1753	14.5401	14.4221	14.8444	14.3107	14.3235	14.3905	14.2925	14.7697	15.0666	13.8965	14.807	14.1709	14.6235	14.1632	14.4221	14.8838	14.5556	14.7034	14.5556
DTWD2	14.5006	14.2053	14.2476	13.9733	14.1921	14.024	14.3376	14.5254	14.3947	14.2184	14.1835	13.5824	14.3144	14.4954	14.2836	14.6679	14.6913	14.0662	14.4316	14.1053	14.8007	14.1835	14.3997	15.3495	14.9821	14.0662	14.7458	14.3571	14.807	14.1632	13.9842	14.7397	14.3859	13.9399	13.7777	14.1219	13.9523	13.5851	14.196	14.6124	14.0036	14.3571	14.8838	13.9956	14.055	13.7844	13.7595	14.3107	12.914
EVL	15.1125	14.7574	15.1732	15.2718	15.3495	15.079	15.0726	15.0666	14.8509	15.3844	14.6799	14.6625	15.1588	14.5504	14.5456	13.8861	14.6799	14.347	14.6625	14.6913	14.8203	14.657	14.807	14.9511	14.9757	14.5658	14.657	14.8269	14.3423	14.2836	14.807	14.5401	14.7155	15.1944	14.5204	14.5971	14.5157	14.7825	14.7514	13.9693	15.1588	14.0429	14.5109	14.4738	13.3546	14.1088	13.4704	15.092	13.9543
PTPLAD2	14.2875	14.09	14.2925	14.0321	14.2388	13.9184	14.3018	14.4177	14.3193	14.0973	14.1219	14.0736	14.3333	14.2606	13.8529	14.377	14.4903	13.7743	14.2652	14.0856	14.5401	14.4404	14.3062	15.0143	14.764	14.377	14.7123	14.5401	14.7458	14.2053	14.1671	14.5157	14.1445	14.0856	14.1632	14.1544	13.6849	13.6235	14.1632	14.8509	14.1791	14.4504	14.7697	14.3107	14.3018	13.9252	14.0856	14.1219	13.5132
CSF2RA	14.3524	14.1671	14.3622	14.196	14.3018	14.1299	14.3144	14.4269	14.2925	14.09	14.2698	14.0973	14.5006	14.4549	14.09	14.3018	14.5352	14.227	14.3622	14.1921	14.6799	14.6179	14.5109	15.4985	14.8384	14.3724	14.7956	14.5971	14.8007	14.1464	14.1587	14.4597	14.1343	14.1464	13.7353	14.2652	14.1587	13.6635	14.024	14.8905	14.0396	14.2788	14.5971	14.1835	14.2875	13.8496	14.1088	14.2429	13.0032
NUBPL	14.3333	14.0937	14.2521	14.1262	14.235	13.9915	14.1875	14.113	14.2974	13.9804	14.1921	14.4692	14.6235	14.5606	14.2307	14.4358	14.5254	14.038	14.3524	14.3062	14.6913	14.8326	14.4269	15.3771	14.7885	14.6978	14.6026	14.5352	14.9316	14.6073	14.4043	14.5109	14.2007	14.1262	14.227	14.0036	14.5606	13.5766	14.1262	14.53	13.9915	14.8132	14.6073	14.3905	14.0662	13.9468	13.7743	14.2476	13.0421
C9orf19	13.9879	14.3376	14.1053	14.4358	14.5606	14.3376	14.3235	14.2053	13.9769	13.9399	14.4221	14.727	14.3815	14.0472	13.9292	14.4083	13.8755	14.0429	14.07	14.1544	14.2836	14.1262	14.1587	13.6381	13.9879	13.7581	14.1299	13.9994	14.09	14.377	14.07	14.6913	13.911	14.4127	14.7885	14.4269	14.2788	14.3018	13.9994	14.4597	14.161	14.3193	14.0281	14.5229	14.6235	14.347	14.6679	14.196	14.6235
NUCB1	13.9581	14.1875	14.1921	14.4221	14.4738	14.4404	14.1632	14.3144	14.2836	14.1388	14.3524	14.657	14.2053	14.1219	14.2698	13.9915	14.1875	14.2521	14.1671	14.3571	14.0973	13.9034	14.3018	14.0489	14.0775	13.5416	14.2521	14.0201	13.9733	14.3724	14.5658	14.3018	13.9994	14.377	14.4549	14.3524	14.3376	14.2925	14.2227	14.347	14.2698	14.1014	14.0626	14.1875	14.8509	14.4692	14.5915	14.1921	14.896
ANXA1	14.3018	14.2698	13.7777	14.1921	13.7743	14.1544	14.2429	14.3524	14.5006	14.1587	13.9994	14.3724	14.5401	14.2007	14.3674	14.2307	14.3524	14.2307	14.0973	14.2606	13.8039	14.6124	14.0201	13.8423	14.0321	14.3859	14.3997	14.2007	14.3571	14.5606	14.4647	14.2745	14.5456	14.0036	14.896	14.6405	15.1268	14.4083	13.8529	14.5504	14.53	15.6772	13.9292	14.3997	14.2099	13.8392	14.4221	13.9879	14.5401
C14orf85	14.3235	14.3107	14.3423	14.2788	14.3235	13.9994	13.9842	14.347	14.196	14.0429	14.3235	13.771	13.8357	14.5971	14.4738	14.4043	14.7155	14.3333	14.347	14.055	14.4221	14.2569	14.4455	15.0666	14.6913	13.9769	14.3548	14.2606	14.8576	13.8965	13.5009	14.8444	14.4954	14.1544	13.6081	13.8791	14.657	13.6081	13.8948	14.576	14.2227	14.6799	14.8384	13.7038	13.9468	14.1835	13.6881	14.2145	13.0565
EFHD2	14.3724	14.3859	14.055	14.3859	14.4851	14.5971	14.5915	14.5401	14.1587	14.1504	14.4083	14.5704	14.5456	14.4043	14.4177	14.727	14.113	14.3235	14.2836	14.1753	14.53	14.4358	14.3859	14.3107	14.1464	14.2875	14.6859	14.2836	14.024	14.4597	14.3674	14.3905	13.8861	14.5504	14.9371	14.4647	14.377	14.3997	14.1504	14.2606	14.0159	14.2652	14.3287	14.4177	14.5808	14.3905	14.3235	13.8461	15.0468
C8orf45	14.4647	14.0321	14.1632	14.1219	14.1709	13.9581	14.3062	14.4221	14.347	14.1262	14.5006	13.5036	14.09	14.6679	14.2788	14.4954	14.6516	14.2053	14.4795	14.2836	14.6291	14.4316	14.3376	15.2169	14.7458	13.6943	14.5808	14.6291	14.764	13.568	13.657	14.6978	13.8755	14.1388	13.6108	14.1425	13.8248	13.6138	14.1388	14.6179	14.055	13.8825	14.9071	13.7844	13.9842	13.9292	13.6473	14.3571	13.0155
GNS	13.9543	14.1709	13.922	14.0736	14.117	14.2053	14.3287	14.0775	13.9	13.8676	13.9184	14.9018	14.2476	13.8005	14.2429	14.3144	14.0588	14.2745	13.8755	13.9034	14.2307	14.2875	14.2053	13.4282	13.864	13.9184	13.9468	13.8461	13.911	14.4795	14.2099	14.657	14.0159	14.1343	14.6352	14.4358	14.055	14.2606	14.0626	14.6859	13.9617	14.5606	14.3997	14.576	13.814	14.1504	14.3376	14.0114	14.7763
COX6B1	14.377	14.3333	14.2007	14.0662	14.0588	14.1504	14.0736	13.9399	14.4127	14.4127	14.3333	14.8509	14.5504	14.1875	14.3423	14.1088	14.0114	14.2476	13.9693	14.2007	14.2788	14.2476	13.9653	13.9733	14.3376	14.5352	13.771	14.3423	14.1464	14.4504	14.9249	14.1875	14.3724	14.1791	14.1262	14.4851	14.7956	14.2974	14.4221	14.2053	14.3376	14.5157	14.0506	14.7337	13.7428	14.2788	14.2145	14.2388	14.6073
CALM3	14.3622	14.3524	14.4851	14.7956	14.498	14.331	14.3423	14.4404	14.1791	14.3947	14.4597	14.1053	14.0662	14.3107	14.3193	14.0363	13.9144	14.235	14.2184	14.2388	13.9842	14.024	14.2788	14.1875	14.1504	14.196	14.2099	14.1504	14.0429	14.2184	13.8423	14.0321	14.3018	14.5401	14.2875	14.2388	13.6108	14.1587	14.4851	14.4455	14.3333	13.8357	14.2476	14.1425	14.0588	14.3815	14.1921	14.8509	13.922
RPL4	14.7574	14.4903	14.8203	14.6124	14.5704	14.8132	14.6738	14.7092	14.9249	15.0726	14.7092	14.2925	14.53	14.5401	14.4954	14.1632	14.2974	14.377	14.4692	14.4851	14.6235	14.5971	14.6026	14.5606	14.7397	14.4455	14.6291	14.8203	14.3724	14.6235	14.4504	14.3622	14.3815	14.6457	14.4221	14.4127	13.821	14.5006	14.9316	13.8755	14.9371	14.0626	14.3815	14.0626	14.2184	14.5971	14.4269	14.4549	14.3724
GMFG	14.3193	14.2925	14.4597	14.2836	14.2698	14.3235	14.1299	14.2184	14.2307	14.3107	14.4504	14.1921	13.9733	14.1587	14.1504	14.2476	14.1587	14.2429	14.1014	14.1464	14.2606	14.0396	14.1709	14.0321	14.2925	13.9328	14.113	14.0775	14.2788	14.117	14.0114	14.2145	14.3062	14.3376	14.07	14.2476	13.9431	14.3062	14.53	14.3235	14.2408	14.1388	14.1835	13.9399	14.4177	14.3524	14.4692	14.3947	14.6978
LASP1	14.3815	14.1921	13.9653	14.3905	14.4597	14.2698	14.2388	14.1219	14.0973	14.3062	14.2227	14.5556	14.3287	13.8676	14.0736	13.9879	13.7479	14.055	14.0074	13.9328	14.0281	13.8825	14.1053	13.6351	13.8461	14.2007	14.1875	13.7328	13.7105	14.09	13.9653	14.2652	14.1299	14.3997	14.5808	14.4083	13.864	14.4692	14.3423	14.4738	14.377	13.922	14.2925	14.4795	14.5006	14.3235	14.4127	14.1709	14.9071
ERP29	14.2521	14.4221	14.5456	14.4269	14.4549	14.6179	14.07	14.4692	14.3905	14.6073	14.3997	14.6352	14.5157	14.2307	14.4127	14.1262	14.3144	14.2388	14.4221	14.3815	14.2875	14.3674	14.4597	14.2388	14.3235	14.5456	14.3018	14.2521	14.3018	14.5006	14.4954	14.2925	14.3997	14.5204	14.5352	14.2569	14.1014	14.5204	14.4692	14.2875	14.4903	14.3144	14.2307	14.196	13.9915	14.4795	14.347	14.1504	14.3235
NKG7	14.6679	14.7155	14.2698	14.6679	14.8326	14.2875	14.6124	14.4954	13.9328	14.4177	15.0542	14.1587	14.576	14.9572	14.4316	14.6913	13.418	14.3376	14.6913	14.6516	14.896	14.09	13.6021	14.2788	14.3524	14.2652	14.5971	14.3674	13.9399	13.8357	14.2388	13.7974	13.4679	15.0857	15.3363	14.3947	14.9947	14.8905	14.5057	13.8248	14.1219	14.0201	14.7763	15.0071	14.5109	14.8697	14.6486	14.0074	15.5833
HNRNPD	14.4738	14.3062	14.2053	14.2698	14.3107	14.0662	14.0036	14.1632	14.2745	14.4316	14.0281	14.227	14.4221	13.8825	14.07	14.0588	14.3724	14.07	14.1464	14.2788	14.2145	14.5157	14.055	14.2007	14.377	14.7763	14.117	14.1632	14.2307	14.2745	14.2569	14.3376	14.5057	14.2569	14.3376	14.0321	14.0736	14.4795	14.3018	14.4504	14.5556	14.3423	14.2184	14.6352	13.8529	14.3333	14.3524	14.3524	14.4851
LOC347376	13.9769	14.1835	14.0736	14.0937	13.8825	13.554	13.9431	13.7232	14.0506	13.8569	14.117	13.9769	13.8825	13.911	13.9653	14.1875	13.8529	13.8248	14.0813	13.8496	13.7609	13.7297	13.738	13.3723	13.6235	13.7353	13.8569	13.8073	14.0036	13.9292	13.9879	14.1299	14.1445	14.0074	14.2388	14.2227	14.3018	14.2388	14.0973	14.3997	14.0856	14.2099	13.72	14.7697	14.6179	14.3622	14.5254	14.4597	14.3107
CRIP1	14.2745	13.5597	14.0472	14.3524	14.2307	14.5504	14.0201	14.1464	14.3997	14.2099	14.8384	13.814	13.8005	14.0736	14.3859	14.8384	14.055	14.7956	14.0036	14.3524	14.2184	14.2521	14.5808	13.9034	14.2307	13.568	14.0588	14.4795	14.0114	14.347	13.8897	14.9249	13.9956	14.0973	14.0775	14.3107	14.3423	14.2227	14.1343	13.9076	14.3423	14.2184	14.7885	13.6943	14.6738	14.6235	14.3674	14.4455	15.1732
TSC22D3	14.5971	14.6738	14.4455	14.5204	14.5971	15.1268	14.7337	14.9071	14.9572	14.6859	14.8203	14.377	14.5704	15.1332	15.022	14.9511	15.322	14.7763	15.0468	15.2501	14.9371	15.2019	14.9316	15.2651	15.3153	14.3235	15.0468	14.9316	14.7034	15.0143	14.6738	13.7297	14.34	14.8838	14.2521	14.6516	15.0337	14.1262	13.554	14.0074	14.657	14.227	14.377	13.8897	14.3193	13.6785	13.7297	13.6202	13.588
ZNF682	14.1813	13.8301	14.1262	14.117	14.227	13.8605	14.2227	14.3947	14.3107	13.9431	14.3287	13.6849	14.2569	14.6073	14.3333	14.576	14.6625	14.0159	14.5808	14.2053	14.8905	14.3571	14.3905	15.4834	14.7034	14.3905	14.576	14.4404	14.8764	14.024	14.0396	14.988	14.2429	14.0472	13.9076	13.9804	14.4738	13.1735	14.2745	14.6913	13.9328	14.2569	15.0666	13.7479	13.6849	13.8676	13.3876	14.3235	12.3769
LTA4H	14.2476	14.1014	13.447	14.0626	13.931	14.1388	14.3622	13.9956	14.2145	14.2429	13.3446	13.8791	14.4795	13.4495	14.4795	13.8316	13.9076	13.9503	14.2227	13.4282	13.9431	13.6785	14.0588	13.5571	13.893	13.8496	14.1014	13.6758	14.3376	13.9956	13.864	14.4549	14.4851	14.4455	13.673	14.3622	13.5597	14.4851	13.9292	14.8132	14.4647	14.4597	13.3248	14.4504	13.8105	14.5606	14.6291	14.1791	14.9699
LILRA5	13.821	14.0588	13.7038	14.0429	14.1632	14.235	13.7038	13.6881	14.0813	13.4653	14.5556	14.4903	14.4404	14.0074	13.9034	14.2788	14.2388	14.2974	14.3947	14.0973	14.1504	13.8897	14.2521	13.3546	13.9581	13.1247	14.1587	13.7974	13.9617	14.0588	14.2476	14.3724	13.9076	14.1219	14.6124	14.347	14.2974	13.8423	13.6881	14.3107	13.7844	14.3235	14.1388	13.9733	14.196	14.6457	14.3947	13.9842	14.7825
CHCHD2	14.3997	14.3235	14.3674	14.377	14.4269	14.2745	14.2788	14.2925	14.1088	14.0937	14.1464	14.6859	13.9503	14.2836	14.3571	14.1921	14.3859	14.2652	14.2521	14.2875	14.196	14.1544	14.1791	14.0856	14.1875	14.3287	14.2429	14.0588	14.2099	13.9693	14.3724	14.347	14.6073	14.0506	14.2007	14.3333	14.4043	14.1388	14.09	14.377	14.2836	14.5057	14.1791	14.4083	14.0363	14.2476	14.1753	14.3376	14.4903
CD81	14.5504	14.2629	14.53	14.5109	14.6235	14.6859	14.6516	14.6625	14.1632	14.5971	14.5456	14.235	14.4043	14.227	14.3018	14.3107	14.0736	14.4269	14.3144	14.4221	14.1587	14.2429	14.4795	14.1791	14.3193	14.5504	14.4851	14.3997	13.9879	14.4316	14.1791	14.2836	14.1587	14.764	14.807	13.8713	13.8713	14.377	14.3287	13.7297	14.4455	13.9034	14.727	14.2925	14.0472	14.576	13.9879	14.4358	14.5704
MDH2	14.4043	14.4063	14.4221	14.4455	14.3376	14.4692	14.2007	14.2569	14.1544	14.2925	14.1587	14.3905	14.1587	14.0937	14.1587	13.8285	14.0159	14.0036	13.9	14.117	14.2227	14.0281	14.1425	13.9399	14.1343	14.2812	14.0856	13.8392	14.1791	14.1791	13.9804	14.2184	14.2307	14.3333	14.2184	14.2698	13.922	14.4504	14.2875	14.1544	14.3107	14.1299	14.2569	14.1219	14.0856	14.4269	14.4795	14.235	14.8697
TMEM17	14.2698	13.8965	13.8529	13.8825	14.024	13.911	13.814	14.3193	14.0626	13.7105	13.9252	14.1753	14.6799	14.4851	14.2925	14.53	14.5865	14.1544	14.2875	14.4504	14.7155	14.988	14.1753	15.3003	14.5915	14.4043	14.1671	14.2099	14.7155	14.1088	14.2606	14.2307	14.5157	13.8755	14.4358	13.9	15.5668	13.5571	13.8105	14.4647	13.8791	15.1461	14.196	14.1921	13.893	13.1854	12.9949	13.9328	12.2194
SNX3	14.0114	14.1632	13.9399	14.0856	14.0775	13.8423	13.9804	14.2606	14.113	14.0736	13.8461	13.9994	14.1709	13.8605	13.9956	13.8825	13.8423	13.9915	13.7444	13.8529	13.8605	13.7444	14.0506	13.4873	13.9034	13.8965	13.8005	13.8948	14.1053	13.9543	14.0159	14.1753	14.0937	14.09	14.1709	14.2974	13.8861	14.3423	14.1088	14.2698	14.1544	14.2053	14.0074	14.3859	14.7092	14.2227	14.4647	14.09	14.5057
HIST1H4C	14.4455	13.9617	14.6913	14.6799	14.7092	14.2652	14.5704	13.7844	14.5352	14.6179	14.6026	14.3235	14.227	14.1671	13.8965	13.6351	13.6235	14.0588	14.0775	14.0321	13.8897	13.8105	13.9543	14.0626	14.09	15.0666	14.2836	13.9653	14.1365	14.0856	13.7139	14.3674	14.117	14.4647	14.3018	14.0626	13.9399	14.196	14.9572	14.0114	14.2974	13.0459	14.4269	13.771	14.2745	14.5836	14.235	14.6859	14.0588
LOC402221	13.8392	13.7809	13.6081	14.055	13.7875	13.3473	13.6081	13.7444	14.1053	14.2388	13.9693	14.4647	14.1921	14.0396	13.493	13.8005	13.5571	13.6785	13.6108	13.7412	13.6473	13.2291	13.3982	13.201	13.5319	13.9733	13.4257	14.0662	13.7512	14.5556	14.6799	13.8357	13.9431	14.0662	14.4127	14.6799	14.2145	14.4549	13.8423	14.5865	13.7549	13.911	13.893	14.6457	14.3524	14.2875	14.6859	14.2974	14.8639
IFITM1	14.235	14.1299	14.5658	14.764	14.7574	14.5006	14.7155	14.0429	14.2521	14.055	14.6913	14.2606	14.0775	14.117	13.9915	14.2569	14.0201	14.3622	13.9733	13.893	14.3018	14.0074	14.2184	13.5009	14.227	13.9994	14.0429	14.2388	13.7353	14.0281	14.6291	14.1671	13.6444	14.7956	14.113	13.8825	14.8639	13.6503	14.5556	13.4366	13.9879	13.1763	14.5658	14.4647	14.5915	14.4851	14.2007	14.4127	14.3622
ATP5A1	14.1343	14.3905	14.347	14.4083	14.2974	14.1219	14.0506	14.3107	13.9653	14.4504	14.0626	14.2145	14.3193	14.0626	13.9733	13.7907	13.8965	14.1299	14.0159	14.0472	13.9804	13.8755	14.0363	13.922	14.0159	14.5808	14.0736	14.024	14.0396	14.1053	13.7743	14.2007	14.0396	14.3724	14.0973	14.1088	13.657	14.5456	14.4358	14.2974	14.2652	13.9468	14.055	14.4269	13.9144	14.3972	14.4177	14.4043	14.4083
PIP5K2B	14.3287	13.8529	14.3235	14.2569	14.2836	13.9733	14.1671	14.227	14.117	13.9252	14.0363	13.9399	14.2875	14.4269	14.1053	14.3622	14.377	14.1504	14.3376	14.0396	14.6026	14.3815	14.3724	14.9947	14.6625	14.235	14.4504	14.4903	14.7574	14.0973	13.9328	14.4738	13.821	14.1014	13.911	13.9431	13.7609	13.5993	14.1425	14.3859	13.8913	14.0973	14.6124	13.9581	13.9431	13.7444	13.8755	14.1835	13.1629
C17orf45	14.4903	14.5456	14.7885	14.8576	14.5456	14.7574	14.4177	14.4851	14.3622	14.7825	14.5376	13.9562	14.4177	14.4738	14.2875	14.2974	14.3423	14.3815	14.2925	14.4381	14.1791	14.227	14.6799	14.2053	14.5606	14.5606	14.4597	14.5204	14.3997	14.3062	14.2974	14.3524	14.2745	14.6026	14.1671	14.1388	13.6785	14.3107	14.5865	13.8897	14.8838	13.6444	14.2007	14.2429	14.113	14.6516	14.5204	14.4177	14.3423
AHNAK	14.2227	14.1484	13.7581	14.3423	14.1088	14.3947	14.1587	14.2145	14.4177	14.1425	14.0472	14.2388	14.1632	13.9543	14.2053	14.3062	14.1835	13.9842	13.9842	14.1709	14.0159	14.0736	14.0114	14.1262	14.1544	13.814	14.2053	14.1753	14.0856	14.3287	14.1835	14.5057	14.4177	14.1587	14.5006	14.4692	14.4549	14.2836	13.9653	14.2099	14.2875	14.5006	14.1504	13.9769	14.1875	13.7676	14.1875	13.9144	14.6291
LOC440055	14.5808	14.4504	14.8384	15.0605	14.9316	15.1659	14.9699	14.9125	14.4404	14.5254	14.5204	14.2307	13.7581	14.07	14.5352	14.1709	14.3107	14.4358	14.2974	14.3423	14.4455	14.5915	14.8639	13.8337	14.4647	14.4358	14.6978	14.6352	14.2145	14.3376	14.8326	14.3423	14.4549	14.9572	14.2629	13.7942	14.2328	14.2307	14.8764	13.322	14.3905	14.024	14.6457	13.3367	13.7809	13.8825	13.8073	14.4221	13.8791
ZNF652	14.2429	14.113	14.235	14.1544	14.2053	14.0114	14.2606	14.09	14.3815	13.9363	14.0201	14.0036	14.0281	14.3997	14.0363	14.2836	14.4316	13.7907	14.4269	13.8791	14.4597	14.2307	14.53	15.0955	14.6457	14.1835	14.4795	14.347	14.6679	14.0937	13.8529	14.3287	13.8174	14.2227	13.5993	14.115	13.7266	13.7105	14.1921	14.5401	13.9581	13.8713	14.6738	13.8496	13.9769	13.7139	13.922	14.3333	13.1832
CIB1	14.024	13.9468	14.4358	14.3333	14.5157	14.6516	14.7034	14.2974	14.3571	14.0813	14.1632	14.2974	14.5057	14.3905	14.1219	14.3524	14.4597	14.1219	14.5915	14.3997	14.4903	14.8007	14.5057	14.6179	14.2788	14.347	14.4221	14.2307	14.2007	14.6291	14.4851	14.1835	13.6537	14.5606	14.7034	13.8861	14.0429	13.9034	14.4177	13.8408	14.0626	13.9076	14.4647	13.9994	14.1587	14.4954	14.1388	14.5157	14.1388
HINT1	14.4127	14.53	14.6859	14.3376	14.4316	14.3815	14.347	14.2652	14.4455	14.7034	14.4903	14.2429	14.3724	14.3947	14.3376	13.9581	14.196	14.5006	14.2606	14.3333	13.9956	14.3062	14.3947	14.2974	14.4043	14.6235	14.227	14.3376	14.3674	14.3859	14.4269	14.0973	14.6124	14.4316	14.2569	14.1753	14.576	14.3947	14.7397	14.1053	14.5504	14.117	14.1875	14.0036	13.7643	14.235	14.1791	14.53	13.9617
MTPN	14.0937	13.893	13.5431	13.9184	13.6849	13.7581	13.6503	13.9252	13.8285	13.7412	13.5009	14.0201	14.0835	13.9503	14.0201	13.8357	13.8105	13.9617	13.5866	13.738	13.5431	13.9144	13.6785	13.6411	13.6081	13.9399	13.6602	13.5626	13.9076	13.9653	13.7974	13.7609	14.0775	13.9034	13.9956	14.0472	14.2836	14.2476	13.9468	14.5456	14.0681	14.576	13.8174	14.5504	13.9956	14.2145	14.227	14.2745	14.2788
SERF2	13.8861	13.9769	13.8676	13.9804	13.9431	13.6943	13.7743	13.5192	13.911	13.911	14.07	14.1088	13.5458	14.0429	13.8897	14.07	13.8316	14.3905	14.0662	14.1014	13.9994	13.5263	13.9503	13.67	13.8897	13.4981	13.5345	14.0506	13.8392	13.864	13.7232	13.9543	13.7942	14.055	13.864	14.2307	13.6051	14.0506	14.0472	14.113	14.0506	13.7006	14.0472	14.0114	14.6291	14.4043	14.4358	14.2652	14.4221
LOC649049	14.3947	14.4316	14.6679	14.5254	14.1791	14.4358	14.2875	14.3235	14.5606	14.5704	14.1262	14.1791	14.2227	14.4316	14.1671	13.893	14.1709	14.3287	14.4549	14.6124	14.2698	14.4455	14.2388	14.347	14.4549	14.5401	14.1388	14.4269	14.2875	14.5352	14.2521	13.8569	14.3107	14.2974	13.9503	14.2836	14.0281	14.347	14.7697	13.5794	14.3724	14.0074	14.2652	13.9543	14.2307	14.4127	14.304	14.4954	13.9994
CD97	13.7643	13.72	13.4082	13.7512	13.922	13.922	13.9581	14.2388	13.8316	13.7006	14.3905	14.1464	14.3062	13.6849	13.6602	14.3333	13.9733	14.024	13.9994	14.1504	14.0363	14.1709	14.0321	14.0159	13.5345	13.3674	14.4083	13.7809	13.4981	14.0036	14.1053	14.4127	13.9503	13.7942	13.8005	13.9252	14.1791	14.1219	13.5319	13.8676	13.7297	14.377	14.2099	14.2053	14.4127	14.1262	14.0626	13.8039	14.5157
HLA-DMA	14.2053	14.2099	14.2606	14.4851	14.5204	14.331	14.1262	14.4455	14.227	14.3622	13.9543	14.2053	13.9076	14.055	13.911	14.235	14.227	14.2698	14.6124	14.3193	14.1194	13.911	14.5006	14.0662	14.3571	13.5626	14.3062	14.2145	14.1425	14.4455	13.8461	14.5606	13.8897	14.8203	14.2476	14.3287	13.7353	14.227	14.117	14.2007	14.1835	13.9915	14.1921	14.5229	14.2569	14.6625	14.304	13.8861	14.4358
PSMB1	14.2099	14.3144	14.2184	14.2521	14.2875	14.3905	13.9363	14.2307	14.1709	14.2007	14.0775	14.2184	14.0321	14.1262	14.0937	14.1504	14.117	14.2836	14.1219	14.1388	14.2476	13.864	14.1504	14.1088	14.113	14.2145	14.1544	14.0114	14.1504	13.9431	14.0813	14.1709	14.0363	14.3144	13.9617	14.2788	13.9292	14.1343	14.2788	14.3287	14.2184	13.7676	14.1709	14.1014	13.9543	14.2521	14.2184	14.2184	14.3905
COX7A2	14.1671	14.4358	14.2974	14.0281	14.0994	14.2476	14.0074	13.922	14.1299	14.3193	14.2788	14.3062	14.2652	14.2099	14.2007	13.922	14.0775	14.2099	14.2476	14.1425	14.0588	13.9252	13.9994	13.7412	14.1587	14.3997	14.024	14.1835	14.2745	14.3622	14.347	13.9915	14.235	14.0429	14.1921	14.2875	14.1671	14.2788	14.3815	14.0662	14.3193	13.9252	14.1425	13.9503	13.717	14.2698	14.1053	14.2053	14.4738
MYADM	13.8316	13.738	13.7549	14.1587	13.6444	14.9018	14.9125	14.727	14.6516	14.4455	14.377	14.919	14.6073	14.8764	14.8764	14.7208	14.7397	14.3674	14.6026	14.8326	14.5157	14.7155	14.8203	14.7514	14.4597	14.7885	15.2501	14.4043	14.3287	14.7034	14.5157	14.235	14.2099	14.3497	14.2836	14.764	13.9693	13.9653	12.7749	13.6444	14.2307	14.3018	14.1753	13.7549	14.8697	12.9992	13.5064	13.2859	13.8073
JTB	14.0472	14.0775	14.3107	14.1504	14.2606	14.3193	14.0813	13.9581	13.8791	14.0074	14.1671	14.5401	14.2184	14.0363	14.0114	13.9804	13.9543	13.9733	13.8791	14.113	14.113	14.2184	14.0662	13.9653	14.055	14.3062	14.0506	14.2569	13.9842	14.3193	14.2145	14.0588	14.1709	14.2836	14.5254	14.0201	14.8444	14.0159	14.2184	14.0036	14.1425	14.4549	13.9431	14.3571	14.1671	14.2053	14.2875	14.0662	14.1219
CD247	14.8384	14.6179	14.377	14.3193	14.6457	14.3018	14.2925	14.2698	13.7875	14.5915	14.5254	13.7581	14.8384	14.2925	14.2606	14.2925	14.0396	13.6669	14.2007	14.2521	14.3376	14.3905	13.9	14.4043	14.4504	14.4221	14.1343	14.2788	14.1544	14.1587	14.2429	14.0662	13.9693	14.4404	14.764	13.911	14.1753	14.7574	14.4083	13.7777	14.4851	13.9994	14.0429	14.3287	13.9733	14.07	14.3144	14.377	14.4127
GSTP1	13.8496	14.2974	14.1464	14.4404	14.5865	14.3423	14.0937	14.1875	13.8676	13.922	14.113	14.07	13.7297	14.1425	14.2476	14.196	14.1504	14.1753	14.1791	14.0159	14.2569	13.6758	14.3144	13.6818	13.8089	13.5968	13.9252	13.8825	14.0159	14.1343	14.0775	14.2569	13.67	14.3062	14.1875	14.0813	13.9144	14.1053	14.235	14.1835	13.7643	13.7907	13.717	14.1791	14.1875	14.3674	14.5808	13.7875	14.6179
YRDC	13.9693	13.8861	13.9292	13.5737	13.9399	13.6444	13.8105	14.1299	14.1504	14.07	13.9956	13.5709	14.4455	14.3622	13.922	14.1791	14.2836	13.8392	14.117	14.0201	14.3674	14.5865	14.09	15.1196	14.4083	14.3107	14.196	14.0813	14.5808	14.1709	13.9363	14.3997	14.4221	13.7907	14.0074	13.6444	14.7208	13.549	13.7479	14.227	13.7676	14.6978	14.5006	13.7105	13.738	13.4366	13.0799	13.7512	12.7399
TNFRSF14	14.196	13.9915	14.1425	14.227	14.3062	14.2974	14.0775	14.1088	13.8605	14.0662	13.9328	14.53	13.9468	14.09	13.8357	13.9733	14.0036	14.2007	13.864	14.0074	14.0506	14.2145	14.2307	14.2307	14.0396	14.09	14.1262	13.9399	13.821	13.9842	14.1875	13.9617	13.8461	14.3235	14.2145	14.0588	13.5431	14.0363	14.1219	14.0588	14.161	13.7743	14.2606	14.6235	14.0201	14.4455	14.3622	14.2875	14.2184
VAMP8	14.117	14.0363	14.0626	14.3235	14.2652	14.2007	14.0363	13.771	13.9363	14.117	14.1504	14.5504	13.7974	13.7105	13.588	13.7461	13.588	13.8755	13.7777	13.6943	14.1262	13.67	13.8695	13.5851	13.6444	13.6602	13.568	13.5968	13.893	13.8496	13.7581	14.2606	13.9144	14.2925	14.1835	14.0396	13.3648	14.1088	14.227	14.194	14.0588	13.821	14.235	13.8713	13.9184	14.4549	14.1587	14.3997	14.5109
IL17RD	14.347	13.7974	13.7974	13.7328	14.1299	13.6138	13.9733	14.0588	13.9915	13.7676	13.8496	13.717	14.196	14.2053	14.1709	14.4177	14.6679	13.9693	14.1343	14.1632	14.4269	14.4221	13.9842	15.079	14.6679	14.1504	14.3235	14.117	14.6405	13.7907	13.8965	14.2476	14.0973	13.821	13.5119	13.7232	14.0159	13.5319	13.7328	14.6291	13.6602	14.5109	14.2788	13.6296	13.6021	13.3546	13.4308	13.7412	12.8902
Septin 2	13.9144	13.922	13.8105	14.1632	14.4221	13.8392	14.0973	13.8392	14.0074	14.0114	13.6381	13.8105	13.8713	13.5402	13.9363	13.6818	13.7777	13.7105	13.771	13.5794	13.6758	13.7549	13.6167	13.7581	13.7974	14.1219	13.8755	13.7859	13.8713	14.1835	13.588	14.1464	13.6326	14.0321	14.2788	13.9503	13.4653	13.9292	14.113	14.1709	13.8285	13.8442	13.8105	14.1464	14.0626	14.1014	14.0813	14.5504	14.1921
EID2B	13.8461	13.8676	13.8461	13.9	14.0626	13.7038	13.9879	14.2429	13.864	13.8825	14.0662	13.7328	13.7105	14.5057	14.2521	14.3815	14.5109	14.3018	14.1835	13.8676	14.3905	14.0036	14.4127	15.0284	14.3815	13.8755	14.2184	14.1671	14.4549	13.4544	13.6785	14.6516	14.3622	13.8965	13.3473	13.5824	14.5456	13.2643	13.5571	14.2388	13.8861	14.2925	14.5865	13.2714	13.588	13.7074	13.2463	13.8392	12.5134
PPT1	14.1813	14.0506	13.9252	14.024	13.6602	13.8496	13.893	13.8285	13.6881	13.698	13.4902	13.7743	14.0074	13.8357	14.3724	13.8791	14.2476	14.0506	13.9617	14.1262	14.0775	13.717	13.1394	13.4817	13.821	13.771	13.657	13.5064	14.2227	13.814	14.377	14.113	14.4429	13.8529	14.0856	14.3674	14.2652	14.3905	13.821	14.6405	14.2925	14.4269	13.5119	13.9842	14.1343	13.7512	14.4404	13.6943	14.3997
SFRS5	14.2388	13.911	13.8965	14.3622	14.347	13.9292	14.0396	14.0201	13.9956	14.347	13.9581	14.055	14.5109	13.7353	13.5263	13.9292	14.1343	13.7412	14.2099	13.9581	14.0736	14.2606	14.1088	14.3018	14.1709	14.3947	14.3815	14.0973	13.7444	13.9915	14.2745	14.3062	14.0588	14.2521	14.0813	13.864	13.5277	14.3287	14.3622	14.0396	14.576	14.4851	14.0937	14.3674	13.7512	14.113	14.3287	14.2698	14.113
C6orf160	14.53	14.4269	13.8861	14.4177	14.2569	13.698	14.2184	13.6444	14.7337	14.6124	14.3724	14.1671	13.8861	14.4455	14.5157	13.5206	14.8905	13.7512	13.7844	14.5808	13.6296	13.9076	14.1464	14.4316	14.6179	15.2436	13.4153	14.4549	13.8676	13.4495	14.9947	13.9034	15.1732	14.5556	14.0281	14.8007	13.8605	14.657	14.576	12.8064	13.7609	14.6457	13.2883	14.0506	13.9503	14.1632	14.6124	13.2643	14.9316
UBE2L6	13.911	13.8755	13.7074	13.9956	14.0506	13.7974	13.864	13.72	13.8755	13.771	13.821	14.3144	13.7366	13.3852	13.7105	14.0813	13.771	14.1875	13.4954	13.568	13.9617	13.2268	13.588	13.2577	13.6818	13.4128	13.7512	13.2339	13.5597	13.3827	14.0201	13.911	13.6411	13.9823	13.821	13.9693	14.1425	13.8357	13.771	14.194	13.8423	13.2957	14.2388	14.4954	14.0736	14.3423	13.9399	13.9956	14.3674
ATP5L	14.1262	14.1425	14.5109	14.0973	14.0363	14.117	14.0114	13.7139	14.2007	14.2307	14.1425	14.3622	14.1219	14.1791	14.113	14.055	13.8861	14.1014	14.2053	14.2476	14.2007	13.9581	13.9431	13.9994	14.2569	14.2974	13.821	14.3144	14.1875	14.1671	14.3524	13.7693	14.0321	13.9653	13.6785	14.1921	14.0396	14.0973	14.4455	13.821	14.2145	13.7844	14.024	14.2788	14.2227	14.3724	14.0114	14.1544	14.2007
ALKBH5	14.1875	14.2569	14.2429	14.3724	14.3287	14.4221	14.2476	14.4316	14.3144	14.3905	14.2875	14.2007	14.2307	14.2184	14.2388	14.0036	14.0662	13.9468	14.1088	14.1835	14.1875	14.2227	14.2099	14.1632	14.1219	14.4692	14.2569	14.2974	14.0588	14.4269	14.0878	13.9994	14.2925	14.3193	14.3947	14.024	14.0363	14.2569	14.1299	14.0813	14.4043	13.9292	14.117	14.2875	14.0036	13.9879	14.0396	13.9915	14.1544
PPBP	12.9505	13.0136	13.2145	13.6266	12.4187	12.5794	13.1694	13.554	14.4549	13.9328	14.5704	12.5332	11.4087	13.8174	14.1921	14.0281	13.0155	13.7353	14.7337	14.4455	12.7424	12.2352	12.8491	11.1669	13.1714	12.4381	13.2739	13.167	14.1632	12.6258	11.7936	12.4982	13.6202	14.227	14.8905	14.2429	13.7038	14.2053	14.2652	15.022	14.2788	13.9543	12.6541	13.7609	14.3423	14.3193	14.727	15.5433	12.4112
HSPA8	14.0973	13.8825	13.9956	14.2974	14.0396	14.0396	13.6849	14.1709	13.7512	14.113	13.9	13.9673	13.9915	13.9581	13.6503	13.7297	13.8285	13.717	13.6021	13.8073	13.6993	13.9292	13.6081	13.8529	13.8713	14.055	13.7643	13.7907	13.9804	13.7974	13.6235	13.8713	14.2388	14.2145	13.8897	13.9034	13.7074	14.3144	14.3997	14.1262	14.3997	14.0159	13.8861	14.1709	13.7428	14.5109	14.07	14.3193	14.4177
ENO1	13.6943	13.9503	13.9468	13.9842	14.0813	14.0813	14.1388	14.0626	13.8965	13.8897	13.9915	14.024	13.7942	13.8105	13.9617	13.7809	14.0626	13.9879	13.922	13.9076	14.0321	13.8461	13.893	13.6167	13.9431	13.738	14.0114	13.588	13.9034	14.1544	13.9292	13.9	13.9252	14.117	14.1053	14.2099	13.6818	14.1709	14.1544	14.1299	14.0937	13.9956	13.7844	13.9184	13.771	14.0363	13.9543	13.922	14.2974
S100A12	13.5319	14.1088	13.7676	13.5178	13.67	13.8316	13.8791	13.5626	13.4338	13.3572	13.2664	14.3423	13.7844	13.4789	14.4647	13.6635	14.0973	13.8587	13.8861	13.6381	13.9733	13.7412	13.8105	12.6635	13.2577	13.2739	13.4544	13.4366	14.6516	13.8713	13.911	13.9956	14.8509	13.6051	13.8861	14.4903	14.6679	14.3193	14.0588	14.5109	13.7105	14.2745	13.2076	13.3097	12.8312	13.6473	14.3724	13.6351	14.196
MRLC2	13.3852	14.1791	14.113	14.1014	13.9	14.0506	13.8713	13.8423	14.0396	14.0321	13.8392	13.922	13.8073	13.8965	13.9543	13.9076	13.9468	14.0114	13.698	13.9879	13.911	13.814	13.717	13.6503	13.9184	14.0201	13.7743	13.8005	13.9292	13.9804	14.0363	14.1053	13.9879	14.0626	13.9144	14.1504	13.8791	14.1753	14.2569	14.09	13.9468	13.893	14.1053	14.0159	13.8461	14.1671	13.9144	14.3674	14.2836
PDCD4	14.1921	13.8073	14.0506	13.9034	14.0036	13.821	14.0429	13.9915	14.3235	13.9581	13.7676	13.549	14.235	14.2388	14.1425	14.1299	14.2429	14.1709	14.3287	14.3376	14.3107	14.6625	14.347	14.7763	14.5006	14.1632	14.5006	14.4358	14.5006	13.9252	13.7353	14.2429	13.9292	14.0281	13.5373	13.9144	13.738	13.4954	14.0736	14.1014	13.9994	13.9184	14.5606	13.657	13.9	13.7743	13.7549	14.2227	13.224
NDUFA4	14.09	14.2875	13.9994	13.9693	13.9653	14.0736	13.9328	13.9653	13.9468	13.9956	13.8897	13.9804	14.2388	14.024	14.1388	13.9468	14.07	14.3524	13.9399	13.9994	14.0114	14.2788	13.9468	13.771	13.9617	14.2053	13.9431	13.9769	13.9503	14.0429	14.3423	13.72	14.5401	13.8569	14.1587	14.055	14.5057	14.0662	14.1587	13.9292	13.9653	14.1921	13.9915	14.0321	13.9034	14.1791	14.0429	14.024	14.0736
WBP2	13.7038	13.5206	13.5709	13.7139	13.7038	13.691	13.6296	13.6473	13.67	13.7479	13.7844	13.6635	13.7074	13.5444	13.8248	13.7549	13.72	13.864	13.7609	13.7974	13.4817	13.554	13.4519	13.4082	13.5571	13.5146	13.6051	13.6051	13.6021	13.6326	13.72	13.7581	13.698	13.8605	13.8285	13.821	14.09	13.7875	13.717	13.893	13.691	14.3333	13.6537	14.2145	14.8203	13.7974	14.1014	14.0321	13.7232
GPX4	13.7676	13.9292	14.0396	13.9363	13.9617	13.7006	13.7266	13.8357	13.698	13.9144	14.227	13.6007	13.864	13.7777	13.9144	13.9	13.911	14.1835	13.9804	14.0363	13.9769	14.2007	13.7907	13.6444	13.8861	13.8791	13.7105	13.9252	14.0472	14.0813	13.9144	13.821	14.09	13.9581	13.8569	13.8316	14.5971	14.2145	13.8248	14.0472	13.8913	14.3724	13.8713	14.07	14.576	13.911	13.9468	14.2099	14.024
ARL6IP5	14.0626	13.8605	13.7139	13.893	13.893	13.4495	13.6051	13.673	13.5178	13.8248	13.7266	13.691	13.8423	13.3827	13.5345	13.7328	13.4231	13.7974	13.3622	13.6503	13.3446	13.5516	13.2883	13.0095	13.568	13.6235	13.2859	13.3273	13.7006	13.3982	13.5737	14.2788	14.1088	13.9292	14.0159	13.9617	13.7105	14.1632	14.0114	14.3947	13.9399	13.8897	13.9804	14.2652	13.6602	14.2606	13.9994	14.3144	14.2875
FLOT2	13.8825	14.1753	14.117	14.347	14.0856	14.0775	14.0626	14.2007	13.9693	14.1343	14.1753	13.8825	13.9144	13.9363	14.1343	13.568	13.8791	13.771	13.7942	14.0937	13.6785	13.6943	13.8791	13.7074	13.8423	13.7743	14.0036	13.6881	13.9363	14.113	13.6849	14.1791	14.1544	14.2429	14.2099	13.8755	13.4244	14.0396	14.1791	13.9236	13.9733	13.8392	14.0114	14.2388	14.0937	14.0626	14.1709	14.1425	14.1504
ALOX5AP	14.0775	14.0114	13.7942	13.9653	14.1262	13.8248	14.235	13.6202	13.6785	13.8073	14.1388	14.2788	14.0472	13.4718	13.7353	13.4628	13.3648	13.2739	13.7006	13.5431	13.4704	13.7809	13.7743	13.3771	13.5458	13.9468	13.9076	13.7859	13.864	14.2007	14.0472	14.1587	14.0114	13.9328	14.2429	13.9543	14.0662	14.113	14.0074	13.9842	14.1875	13.673	13.9034	14.2836	14.6799	14.0736	14.2521	13.6818	13.9144
N4BP2	14.2588	13.9252	13.9915	13.8496	13.9994	13.5036	14.2099	14.0662	14.2099	13.9617	13.9034	13.893	13.8039	14.2788	14.235	14.2745	14.3947	14.0775	14.235	14.0775	14.5556	14.196	14.1875	14.964	14.5254	13.8861	14.4404	14.2745	14.4597	13.9733	13.322	14.227	13.6351	13.8316	13.549	13.7412	13.717	13.6785	13.8861	14.4316	13.8755	13.7479	14.53	13.6411	13.6818	13.5709	13.6235	13.9076	12.987
FCER1G	13.4519	13.8039	13.0952	13.2763	13.2957	13.2664	13.1563	13.0545	13.8897	13.5968	13.7743	14.2099	13.6785	13.6081	13.7512	14.1388	13.8496	14.1791	13.7266	13.698	13.8791	13.4104	13.6108	13.0479	13.6503	12.7572	13.2689	13.6669	13.8174	13.8569	13.9034	13.8861	13.3446	13.4817	13.8357	14.4316	14.1262	13.9733	13.4954	14.4269	13.3297	14.1875	14.09	13.9363	13.7328	13.6537	13.893	13.9733	14.576
SFRS6	14.1464	14.2145	14.1219	14.3018	14.0281	14.196	14.117	14.1835	14.09	14.4404	13.3929	14.2569	14.2698	14.0201	13.9431	13.911	14.1632	13.8357	14.1504	14.0736	13.8713	14.2053	14.2569	14.3622	14.3724	14.5204	14.3859	13.9292	13.9915	14.3018	14.0878	13.9503	13.8529	14.235	14.1544	14.196	13.5036	14.0429	14.0506	13.9468	14.4504	14.4795	13.922	14.2476	13.8392	14.1343	14.0973	13.9034	13.8039
ARPC5	14.0736	14.0396	13.4981	13.7942	13.7581	13.6235	13.46	13.6081	13.4981	13.5319	13.3771	13.5652	13.7412	13.0278	13.549	13.3771	13.5234	13.6503	13.2484	13.418	13.3982	13.6849	13.3953	12.9411	13.3097	13.5064	13.0298	13.0821	13.5913	13.4308	13.4205	14.0937	14.2875	13.9468	14.1219	13.8005	13.6943	14.2875	13.9733	14.727	14.0074	14.2007	13.771	14.0588	13.7777	14.0114	14.1544	14.1875	14.6913
POFUT1	13.9503	13.9076	13.9693	13.67	14.2476	13.9076	14.09	13.9144	14.07	13.5373	13.8825	13.3052	13.6537	14.1709	14.0775	14.2249	14.2307	13.922	14.0856	14.1791	14.4043	14.1484	14.5865	14.8269	14.1088	13.7942	14.1219	14.3062	14.4795	13.5178	12.881	13.8965	14.1835	13.8496	13.2121	13.7875	14.0775	13.4873	13.5373	14.3193	13.922	14.1219	14.2698	13.0498	13.9653	13.4641	13.1923	13.7266	12.7241
CORO1A	13.7412	13.9034	13.8357	14.1753	14.0074	13.7743	13.657	14.0114	13.922	14.1632	14.3144	13.7412	13.7875	13.7809	13.5851	13.771	13.6635	13.814	13.738	13.864	13.8073	13.4153	13.6537	13.4845	13.5064	13.6537	13.5402	13.8105	13.6602	13.7581	13.9	14.3193	14.1053	14.1753	13.8461	13.67	13.7328	14.1791	14.2388	13.7942	13.7479	13.7512	14.3235	13.9076	13.7006	14.2745	14.4954	14.4692	14.5352
AP1S2	13.8791	13.7105	13.698	13.9328	13.8357	13.7809	13.3097	13.7038	13.72	13.5766	13.3028	13.9879	13.7676	13.5626	13.8496	14.5254	13.5766	14.0472	13.5064	13.5064	13.7479	14.1484	13.7412	12.8944	13.4391	13.6108	13.3395	13.5206	14.0775	14.0472	13.7038	14.2388	14.113	13.7353	14.1343	14.1053	13.8479	14.117	13.9399	14.1632	13.8569	14.1671	13.6785	14.0472	13.6081	14.0813	14.1425	14.07	14.2698
UQCRH	13.8676	14.0973	13.9842	14.2606	14.0736	14.1587	14.0281	14.0321	13.9581	13.9879	13.9503	14.1875	14.0626	13.9	13.8676	13.9994	13.8073	13.9076	13.9363	14.1671	14.1425	13.8569	14.0973	13.3801	13.9804	14.2388	13.9363	14.113	13.7479	14.1425	14.3815	14.0201	14.055	14.0937	14.1504	13.8105	13.8676	14.0626	14.2606	13.911	14.0681	13.7974	13.9879	13.9252	13.5373	13.7942	13.8423	13.9503	13.9252
EIF4A2	14.3107	14.2184	14.1875	14.1671	13.9693	13.9804	13.8676	14.3674	14.2429	14.5606	13.9144	14.09	14.5556	14.0775	14.2099	14.0973	14.4127	14.0201	14.1544	14.3622	14.0472	14.5784	13.9202	14.3815	14.3905	14.4647	14.1835	14.09	14.2388	13.9769	14.2184	13.8755	14.2788	14.1299	14.2629	13.9733	13.893	14.3376	14.1464	13.9581	14.6073	14.07	14.0036	13.8248	13.4519	14.0472	13.8357	13.9994	13.8948
WAS	13.9842	14.0626	13.6849	13.8357	13.9842	13.6296	13.5737	13.7581	13.7974	13.8461	14.0159	14.0856	13.8569	13.5345	13.8825	13.9252	14.0281	13.8965	13.8073	13.8461	13.9653	13.5993	13.4366	13.5709	13.9076	13.4519	13.6943	13.5737	13.6758	13.5913	13.7105	14.0736	13.922	13.9769	13.9994	13.7105	14.2588	14.0736	13.7074	14.0321	13.8461	14.1053	13.9	14.113	13.8713	14.055	14.3107	13.7609	14.4795
ITM2B	14.1014	13.9879	13.5913	13.691	13.3982	13.5458	13.5234	13.6503	13.7232	13.9653	13.6473	14.347	14.3905	13.5737	14.0036	13.8248	13.9328	13.8676	13.8605	14.227	13.5913	14.2388	13.3929	13.5036	13.8005	13.864	13.8357	13.9503	13.8755	13.9363	14.5057	14.0094	14.2836	13.7232	14.0201	14.0662	15.0989	14.3235	13.7266	13.9363	14.1753	14.5704	13.554	14.4851	14.2652	13.738	13.6635	13.8073	13.9292
SLC2A3	13.5178	13.717	14.024	13.5234	13.814	14.3997	15.2849	14.196	14.7458	14.1464	14.0973	14.5606	14.3376	15.1732	15.0989	14.8905	15.079	14.7397	15.2788	14.807	14.8576	15.092	15.0468	14.9572	14.9371	14.7092	14.8838	14.53	14.3622	14.8764	14.4455	13.8605	13.6881	13.9823	13.6266	14.1835	14.0626	13.4205	13.2833	13.4679	13.3546	14.3062	13.7609	13.8392	14.1753	13.1923	13.4762	13.2957	13.505
PPP1R15A	14.4358	13.9543	14.0662	14.4647	14.377	15.152	15.2436	14.8639	14.9316	14.8838	14.9444	15.2088	14.9125	15.3003	15.4513	15.2019	15.2651	15.0071	15.3153	15.3771	15.2357	14.9511	15.3436	15.0071	14.9511	14.7697	15.1268	14.9947	14.5704	14.7208	14.7574	14.9572	14.657	14.7763	14.377	14.7034	14.2875	14.5254	13.0718	13.0351	14.4316	13.771	14.3376	14.1088	14.3144	13.2976	13.7006	13.0865	13.5968
RPL13A	14.3144	14.227	14.6291	14.4316	14.1587	14.6124	14.377	14.3905	14.4738	14.8326	14.9071	13.8676	13.9879	14.4903	14.4221	14.0775	14.4358	14.4455	14.3674	14.4647	14.055	14.1753	14.235	14.3724	14.4954	14.1088	14.2476	14.657	14.2606	14.1299	14.5504	14.0429	14.3674	14.4903	13.9842	13.8039	13.4845	14.2184	14.5401	13.2859	14.6738	13.4981	14.4954	13.7907	14.0506	14.3107	14.1632	14.3859	13.8948
LOC127295	14.0588	14.1484	14.7574	14.6978	14.7885	14.9071	14.6913	14.5704	14.2606	14.2652	14.4455	13.9184	14.2836	14.3524	14.3815	14.0114	14.1053	14.3724	14.09	14.3287	14.1632	14.1425	14.2606	14.2698	14.2745	14.1464	14.235	14.2476	14.055	14.0718	14.2007	14.09	14.1014	14.6799	14.0363	13.7581	14.4504	13.9184	14.7034	12.9834	14.1343	13.7444	14.2429	13.5939	13.7353	14.2184	14.0506	14.5006	13.7479
LGALS1	13.588	14.0074	13.5292	13.3028	13.5516	13.8105	13.0889	13.3446	13.7942	13.5119	14.2007	13.8357	13.3395	13.7038	13.9328	14.3287	13.9956	14.4692	13.9879	13.7581	14.1671	13.4762	14.1343	13.1786	13.7777	12.827	13.3497	14.1343	13.8285	13.8676	13.9184	14.196	13.5091	13.4205	13.6444	14.0973	14.1544	14.2521	13.7038	13.9034	13.6081	13.5939	14.4127	13.8285	13.922	14.4316	14.6738	13.8423	14.9018
COX5B	13.7875	13.9	14.0775	13.9076	14.2145	14.2227	14.2053	13.738	13.7743	13.738	14.0736	14.1835	13.717	13.9144	13.9994	14.2249	13.9292	14.0074	13.9543	13.8861	14.1835	13.5234	14.117	13.5528	13.7875	13.7643	13.7074	14.1791	13.7974	14.1262	14.0074	14.1219	13.6849	14.1425	14.2307	13.9769	13.7676	13.9363	14.07	13.72	13.738	13.6635	14.1587	14.0775	13.9363	14.4177	14.4083	14.1343	14.4043
COX8A	13.7609	13.9804	14.0813	13.8861	13.9733	14.0472	13.8861	13.4845	13.9252	13.9076	14.1709	14.0626	13.657	14.0973	13.9842	13.8676	13.9503	14.2925	14.1753	13.9733	14.0036	13.568	13.9252	13.5626	13.9468	13.893	13.7974	14.0736	13.8105	13.922	14.0662	13.9733	13.5234	14.0363	13.9	14.1262	13.9252	13.8569	13.9804	13.814	13.6296	13.5319	14.0396	13.2664	13.8316	13.9581	14.1835	14.1587	14.0937
LOC645688	14.1632	14.2307	14.6738	14.2476	14.07	14.1671	14.0472	14.0074	14.4597	14.4269	14.2974	13.7974	14.3859	14.2875	14.2569	14.113	14.0472	14.1671	14.2307	14.1587	14.0429	13.8676	14.0429	14.1014	14.3947	14.4597	13.8965	14.1388	14.1365	14.1014	14.4404	13.9363	13.9543	13.9363	13.7328	14.1014	13.8285	13.9693	14.7574	13.3929	14.3144	13.7038	13.9617	13.7643	14.1709	14.5254	13.8174	14.0472	14.0074
RPL15	14.1587	14.4597	14.3193	14.2099	13.911	14.0281	13.8755	14.5109	14.1753	14.6026	13.9842	13.9144	14.5865	14.2569	14.2227	13.8713	14.2569	14.0973	14.2698	14.4269	13.9363	14.3333	14.024	14.196	14.1835	14.6291	14.2652	14.227	14.2429	14.3107	14.3622	13.5993	14.347	14.113	14.2698	14.09	13.9184	14.5401	14.2476	13.9328	14.6352	14.2388	12.9793	13.7777	13.6051	14.0301	13.8392	13.8676	13.9503
HLA-DRB4	13.2145	13.7907	13.6108	13.7549	14.7155	13.4205	13.6266	13.7907	13.588	13.6881	13.3953	14.9371	15.079	13.717	13.322	13.4572	13.6818	14.8697	13.4789	14.4597	13.5993	13.5824	14.0396	13.717	14.1053	13.4308	14.4127	13.6785	13.6943	14.2388	14.2925	14.07	13.2214	13.8105	14.0472	14.4455	14.2227	14.0114	13.3852	14.6679	13.9292	14.9757	14.3333	15.4078	13.5993	14.2307	14.09	13.5036	13.7907
HMGN1	14.0363	14.07	14.2788	14.113	14.1388	14.1343	14.2836	14.1671	13.9144	14.2875	13.717	14.0363	14.1791	13.893	13.9581	13.7743	13.9653	13.8005	14.0472	14.0813	13.8122	14.3144	14.2875	13.8825	13.9733	14.53	14.1632	14.196	13.922	14.3333	14.2053	13.7907	14.2053	13.9693	14.4504	13.9076	14.0036	13.9468	14.2145	13.6051	14.3018	13.717	14.0813	13.911	13.8676	13.8897	13.9	14.2788	14.07
ANXA2	13.5091	13.6785	13.3052	13.8105	13.6473	14.0856	13.4391	13.5597	13.6473	13.6785	13.6758	14.3815	13.46	13.3747	13.67	13.9653	13.6266	13.7479	13.5597	13.5319	13.5794	13.3594	13.8861	12.9026	13.3648	13.3594	13.4572	13.5766	13.6202	13.8861	13.6411	14.1504	13.418	13.7549	13.893	14.0756	13.8479	13.9879	13.8285	14.2307	13.821	14.1262	13.8825	14.1388	13.691	14.0588	14.1343	13.8285	14.7092
MS4A6A	13.8105	14.0662	13.3648	13.698	13.6943	13.4445	13.3827	13.657	13.7844	13.5913	13.3002	14.2652	13.72	13.4845	13.8316	14.09	13.6669	13.1763	13.6758	14.0429	13.6081	13.241	13.9144	12.7374	13.4762	13.0889	13.6849	13.9693	13.8496	13.9503	14.1299	14.4954	13.6138	13.5263	14.0036	14.3815	14.3107	14.4177	13.7549	14.3144	13.8529	14.0114	13.2599	13.7512	13.8755	13.5206	14.2307	13.5766	14.1753
FAM119A	13.9252	13.7412	13.821	13.6235	13.821	13.568	13.7328	14.1921	14.1388	13.717	13.771	13.5597	13.9399	14.2745	14.3144	14.1219	14.3333	13.9328	14.0429	13.911	14.2388	14.235	14.0074	14.8764	14.3018	13.9915	14.0662	13.9581	14.576	13.5009	13.4653	14.2974	14.4597	13.6503	13.6411	13.698	14.3724	13.3172	13.6411	14.2476	13.8039	14.5456	14.4358	13.2339	13.3876	13.1649	12.599	13.7974	12.581
WDR1	13.8423	13.8423	13.6202	13.9503	13.72	13.6503	13.6758	13.8105	13.5766	13.7875	13.8248	13.7942	13.7777	13.4902	13.5824	13.5737	13.3097	13.6849	13.3572	13.4007	13.3594	13.5402	13.4082	13.4153	13.3319	14.0159	13.7942	13.4572	13.4731	13.7353	13.5968	13.6785	13.8569	13.8461	13.8713	13.9879	14.0114	13.8301	13.9431	14.235	13.9034	14.0937	13.691	13.893	14.0429	13.8965	13.7676	14.0973	13.9581
LOC134997	14.055	14.1053	13.8569	13.922	13.8861	13.7139	13.6881	13.9	13.8423	14.2745	14.0588	14.0775	14.0396	13.8897	13.7038	13.6943	13.8174	14.0736	13.7676	14.0036	13.6818	13.7676	13.8073	13.3052	13.7297	14.1262	13.6818	13.9431	13.72	14.0718	14.1632	13.9769	14.2145	13.9144	13.9733	13.7297	13.691	14.2745	14.1753	13.864	14.1053	14.0588	13.8965	13.7809	13.8005	14.2429	14.2099	14.0937	14.3018
POLR1D	13.9915	14.2007	14.1791	14.0396	14.0937	14.3107	14.055	14.235	13.8357	14.2606	14.024	14.1425	14.0835	13.9733	14.0074	13.8461	14.0363	14.117	14.196	14.4127	14.2745	14.3622	14.3193	14.2184	14.196	14.1343	14.1753	14.3018	13.7581	14.2307	14.0736	13.7105	14.0736	14.196	13.8392	14.0506	13.9733	14.024	13.8461	13.4282	14.1262	13.5794	14.1262	13.7444	14.235	13.9842	13.8825	13.821	13.7942
CLIC1	13.7925	13.8897	13.554	13.8461	13.771	13.8285	13.5939	13.5373	14.0472	13.6473	13.8861	14.2836	13.3801	13.72	14.0412	14.0159	13.6411	13.7643	13.7581	13.9252	13.8005	13.4789	13.5794	13.3074	13.6351	13.3273	13.5571	13.5091	13.7412	13.9184	13.8039	13.922	13.8713	13.8676	13.8423	13.9956	13.8316	14.1544	13.9034	14.0937	13.4308	13.9399	13.6503	13.9292	14.0813	14.1299	14.117	13.9292	14.53
PLEK	13.814	13.4379	13.0498	13.4873	13.3473	13.5626	13.3594	13.7328	13.657	13.6021	13.4205	13.8965	13.7139	13.657	13.6138	13.9144	13.7006	13.72	13.7122	13.7105	13.7038	12.8596	13.5766	13.447	13.5402	13.3074	13.6108	13.7609	13.4704	13.673	13.652	14.0775	13.2484	13.3801	13.7297	13.8285	13.1413	14.1014	13.418	14.0736	13.4544	13.9653	13.9399	14.5915	14.3235	13.9	14.0201	14.055	14.3947
LYL1	13.3473	13.1247	13.3982	13.9399	13.8174	13.2799	13.063	13.2339	13.0952	13.1435	13.5794	13.4817	13.1225	12.928	12.9527	13.1986	13.0459	13.4366	12.8219	13.1371	13.4308	12.7062	13.2934	12.5355	12.5794	12.6272	12.7391	12.897	13.0363	13.1832	12.8953	14.1343	13.3723	13.8713	13.5458	13.2976	12.7953	13.8496	13.8676	14.1671	13.447	13.5402	13.9733	14.1504	14.4504	14.5204	14.5456	14.2925	14.2569
CYB5R3	13.5597	13.7038	13.4762	13.8676	13.8529	13.8073	13.698	13.8248	13.554	13.5234	13.7974	13.7479	13.5119	13.549	13.9485	13.4704	13.5709	13.9184	13.6235	13.7444	13.3074	13.2029	13.7105	13.3194	13.5009	13.4558	13.5939	13.4507	13.698	13.7412	13.6326	13.5626	13.6669	13.9879	14.0429	13.6021	13.8755	13.8605	13.6744	13.9956	13.6266	13.8005	13.5626	13.6108	13.8791	13.8005	13.8569	14.1088	13.8605
LYN	13.6351	13.9733	13.4128	13.4282	13.1394	13.1967	13.493	13.6266	13.7643	13.4817	13.673	13.9562	14.0429	13.7942	13.9184	14.2521	14.1671	14.2788	13.4902	13.5737	13.72	14.0321	13.6881	13.8461	13.6411	13.6351	13.698	13.7743	14.1088	14.0662	14.0937	13.6381	13.6943	13.3273	13.6351	14.3018	14.5204	14.1671	13.5737	14.3815	13.5091	13.864	14.227	14.0201	13.9879	13.8529	13.5036	13.588	14.1464
CSF1R	13.9292	13.6818	13.2976	13.4544	13.9363	13.2314	12.7524	13.6669	13.5345	13.5263	13.554	14.0429	14.113	13.1312	13.3876	13.7074	13.6881	14.0281	13.5345	13.2976	13.6051	13.1293	13.5851	12.9262	12.9852	12.5931	13.2214	13.1435	13.3699	13.2934	13.1763	14.2099	13.7479	13.8392	13.6326	14.0074	13.4205	14.0036	13.8039	14.4221	13.4845	14.1632	14.3571	13.8676	14.09	14.5504	13.9786	13.9363	15.0071
TIMP1	13.4338	13.3771	13.3929	13.8285	13.9184	13.7844	13.5178	13.3674	13.7266	13.2643	14.2388	13.7006	13.2121	13.4366	13.4679	14.1425	13.7907	14.2227	13.9468	13.7479	13.5064	13.3771	14.3107	13.1735	13.3248	12.6711	13.5474	13.5597	13.4845	13.6669	13.8248	13.7844	13.1735	13.814	13.4762	13.9653	14.2476	13.5105	13.4845	13.9503	13.241	13.7412	13.8496	13.4817	14.4903	14.1921	14.055	13.6881	14.2099
LOC645385	13.9733	14.377	14.3333	14.1875	14.1504	14.0074	14.3571	14.6179	14.0662	14.6799	13.8105	13.9956	14.4083	14.2652	13.864	13.9543	14.235	14.1343	14.4043	14.576	13.8676	14.5606	14.0775	14.2652	14.4738	14.5556	14.7574	14.5556	14.2476	14.3997	14.727	13.7139	14.2476	14.1088	14.2974	14.2925	14.113	14.235	14.0662	13.7676	14.5658	14.3107	13.6021	14.0363	13.5292	14.1544	14.0736	13.9543	14.055
HYPK	13.9431	13.8791	13.5516	13.5597	14.0321	13.4845	13.7512	13.9328	13.8569	13.4845	13.6326	13.7297	13.9804	14.1299	14.0321	14.1587	14.4455	13.9252	14.1875	13.8897	14.2521	14.5254	14.2476	14.9071	14.5504	14.1544	14.2388	14.055	14.6625	13.7479	13.8316	13.9399	14.1671	13.6326	13.5178	13.6785	14.5006	13.3747	13.322	14.4404	13.8005	14.727	14.113	13.4034	13.1649	13.0339	12.9354	13.4231	12.2551
ITGB1	13.7925	13.4679	13.3319	13.8316	13.6266	13.8569	13.4873	14.0973	13.8039	13.8861	13.5431	13.316	13.6503	13.814	13.821	13.7006	13.6021	13.8587	13.6051	13.6202	13.3172	13.588	13.5709	13.2463	13.4282	13.7328	13.7907	13.4257	13.7809	13.6202	13.549	13.7875	14.0813	13.911	14.1791	13.8248	13.7297	14.1464	13.9503	13.9804	14.1014	14.09	13.8357	14.0074	13.6108	13.673	13.698	14.1753	13.9769
AURKAIP1	13.6138	13.7609	14.2388	14.2227	14.2925	13.9693	13.8825	13.6602	13.6818	13.8174	14.0429	14.1299	13.7006	13.8713	13.5234	13.738	13.5402	13.8039	13.7122	13.8755	14.1014	13.8285	13.8005	13.7105	13.6138	13.9503	13.5516	13.8791	13.7844	13.9581	13.7328	13.9673	13.588	14.2007	14.1388	13.738	13.5458	13.6366	14.3168	13.6108	13.8248	13.588	14.0588	14.2099	14.2521	14.3287	14.4504	13.9693	14.2227
CTSB	13.7139	13.821	14.0036	13.8073	14.09	13.7353	13.8073	13.8073	13.6537	14.0506	14.0506	13.67	13.6818	13.6411	13.5402	13.6849	13.698	13.8791	13.5652	13.5402	13.8965	13.5597	14.0856	14.0036	13.7809	13.1714	13.8529	14.0321	13.9144	13.7232	13.3367	14.0856	13.8392	14.0736	13.9769	14.1791	13.3876	13.698	13.8791	13.9769	13.8392	13.2145	14.1671	13.6326	13.8423	13.9956	14.0662	13.6503	14.0321
AMY1A	15.1871	15.022	14.7208	13.7038	13.4391	12.6885	13.8005	13.9751	13.6849	13.6758	14.8905	13.6943	13.8174	13.4231	13.6881	12.6953	13.7875	14.988	13.5993	13.5939	13.5458	13.6602	13.4205	13.1585	13.4679	13.9842	13.6758	13.2169	13.5516	13.8073	13.4082	14.0396	14.1791	13.4104	13.8965	13.3546	13.3929	13.9252	13.8174	13.8105	12.9262	13.8316	13.738	13.8825	13.673	13.657	14.0036	13.6758	14.4692
LOC338758	13.9468	14.055	13.8713	13.6503	13.7006	14.0588	14.7825	13.8713	14.5556	14.1835	14.8509	14.807	14.6026	14.5915	14.5808	14.7092	14.4692	14.5504	14.1632	14.4738	14.3997	14.5658	14.4692	14.1671	14.0813	14.1053	13.7777	14.5456	14.3947	14.2476	14.6679	15.1871	14.7092	13.864	14.4851	14.0429	14.2521	14.2429	13.2484	14.3724	13.9804	13.7232	13.7974	14.2007	14.2698	13.9144	13.5319	12.625	14.09
ALOX5	13.5009	13.5824	13.5968	13.8713	13.9581	14.0321	13.7974	13.9617	13.4405	13.2883	13.4544	13.9252	13.1057	13.3982	13.2714	13.6167	13.6444	13.3546	13.5206	13.3953	13.6326	12.7888	13.9399	13.1079	13.3747	13.0012	13.3827	13.3419	13.6108	13.6108	13.1271	14.0506	13.1854	14.0114	13.5009	14.1299	13.0136	13.7743	13.5036	14.3622	13.5824	13.4082	13.7875	13.8605	14.1388	13.9543	14.2698	13.6021	13.9034
AIF1	13.7353	13.9956	13.2121	13.4762	13.7328	13.4231	13.2739	13.5458	13.7609	13.4704	13.7038	14.4954	13.911	13.5571	13.7809	13.9363	13.8248	13.8285	13.6381	13.5345	13.7743	13.8496	13.6351	13.4495	13.3674	13.2268	13.3648	13.3194	13.771	13.9	13.8861	13.9292	13.7444	13.6351	13.9292	14.4221	14.3333	14.0937	13.9076	14.2227	13.5146	14.3674	13.9769	13.7875	13.5939	13.9915	13.8861	13.6266	14.2476
LRAP	13.8713	13.7777	13.5939	13.6167	13.8316	13.6818	13.6167	13.9034	13.7297	13.6326	13.6669	13.5178	14.0114	14.2521	14.3062	14.0736	14.2875	13.8105	14.0281	13.8105	14.3287	14.347	13.9804	14.6625	14.3287	14.0074	13.8791	13.911	14.4903	13.5571	13.5597	13.9673	14.1753	13.6473	13.588	13.4873	14.9572	13.4257	13.4789	14.1753	13.6167	14.4692	14.3524	13.447	13.236	13.1539	12.7702	13.6381	12.5291
TBCA	13.9	13.8248	14.1388	13.9252	14.1425	13.9468	13.7353	13.7512	13.8861	14.1753	13.6635	14.1709	13.9034	13.5824	13.698	13.657	13.6473	13.9956	13.8713	13.8357	13.8569	13.7581	13.814	13.5146	13.7328	14.0626	13.4445	13.8174	13.7139	13.8392	13.9915	13.9431	13.8039	13.9956	13.8174	13.717	13.7907	13.8897	14.2925	13.6881	13.9252	13.8861	13.9842	14.1343	13.72	14.196	14.0074	14.0159	14.2606
DEFA3	11.7926	14.9511	14.0363	15.558	13.201	15.558	17.0125	14.117	12.8219	11.1856	13.1036	10.5093	10.5155	14.1921	14.8697	12.059	12.0468	12.5887	12.2896	14.3235	12.0473	11.5475	14.1219	12.1932	11.9484	13.4817	14.4455	12.3439	13.657	16.0706	13.6602	12.6478	13.9184	12.5553	15.5513	15.0666	13.7581	15.3291	12.6798	14.964	12.7324	14.6179	13.0545	13.1457	12.599	12.6635	15.7118	12.7305	10.5793
ZFP36L1	13.9994	13.6473	13.6669	13.5824	13.5009	13.4954	13.717	13.7353	14.1262	13.9503	13.5766	14.3376	14.1014	13.771	14.0813	14.0937	13.9804	13.7777	13.893	13.9144	13.9252	14.2974	13.9879	13.5968	13.7676	13.9076	13.418	13.8357	14.0937	13.8605	13.67	14.377	14.1875	13.3028	13.7006	13.6943	13.493	14.0856	13.864	13.8605	13.814	13.9617	13.549	14.0429	13.5709	13.7907	13.9733	13.7743	13.6503
LOC442454	14.113	14.0281	14.2145	14.1835	14.1219	14.2388	14.1791	14.0937	13.8073	14.0201	13.5458	13.5373	13.8605	13.864	13.9769	13.814	13.9842	13.9399	13.8676	14.1299	13.9468	13.9	14.1671	13.698	14.07	13.799	14.0626	14.07	14.0201	14.0321	14.1425	13.67	13.7777	14.0159	14.024	13.5993	13.7844	13.7185	14.3524	13.6081	13.9842	13.738	13.9693	13.8357	13.8605	13.9733	13.7595	13.7581	14.0363
YWHAQ	13.8285	13.8392	13.6444	13.7676	13.7353	14.0937	13.922	13.9994	14.0588	14.0396	13.7643	14.115	14.2099	14.0856	14.1835	14.0429	13.8897	13.8423	13.9956	14.0506	13.9915	14.2745	13.6235	13.6849	13.8791	14.4177	14.09	13.7549	13.7038	14.1504	13.922	13.8529	13.9034	13.9076	13.9653	13.8392	13.7232	13.9399	13.698	13.6943	14.0736	13.8248	13.6051	14.0281	13.657	13.7412	13.6411	13.7549	14.1343
HK1	13.6635	13.5968	13.6051	13.864	13.8605	13.5571	13.3901	13.5402	13.3395	13.4981	13.8357	14.0321	13.8248	13.322	13.4653	13.5913	13.3172	13.5597	13.236	13.3801	13.4338	13.4653	13.2554	13.3194	13.4104	13.2833	13.2384	13.236	13.3122	13.771	13.4902	13.657	13.7643	13.8861	14.1299	13.7479	14.0201	13.6881	13.8357	13.9653	13.5939	14.1425	13.6351	13.864	13.9252	13.691	13.738	13.7844	13.8248
HCLS1	13.7512	14.1219	13.673	14.0472	13.8965	13.7313	13.8423	14.0472	13.6138	13.7844	14.0114	14.0281	13.8755	13.4653	13.5009	13.9617	13.821	13.7266	13.6444	13.9653	13.4366	13.0974	13.8174	13.4445	13.9769	13.1946	13.8897	13.8285	13.5064	13.7777	13.7891	14.026	13.8073	13.9	13.4653	13.9994	13.67	13.3147	13.9184	13.9236	13.9363	13.8496	13.9144	13.5146	13.864	13.6296	14.2227	13.8897	14.2307
LOC648249	14.1753	14.2476	14.6235	14.4504	14.113	14.5254	14.3859	14.0813	14.1014	14.5204	14.4795	13.8392	13.9956	14.2429	13.9804	13.7232	13.7609	14.038	14.113	14.2698	13.9328	13.9733	14.0937	14.1544	14.2227	14.3423	14.2698	14.2652	14.1587	14.2227	14.3018	13.5939	14.0281	14.3497	13.6818	13.8569	13.3699	13.9769	14.8132	13.1901	14.3674	13.1694	13.7942	13.5794	13.9994	14.4738	14.113	14.2606	13.7105
SOD1	14.0036	14.117	14.0937	14.0506	14.055	14.1464	14.1835	13.9804	13.7105	14.2053	14.1053	13.7105	13.698	13.8316	13.8285	13.7942	13.9693	14.0321	13.9769	14.1088	13.738	13.691	13.9617	13.7479	13.9	14.0114	13.9842	13.9733	13.9581	13.8791	14.0036	13.9252	14.1504	14.07	13.9468	13.7743	14.1388	13.9915	14.2521	13.6785	14.0363	13.9503	14.0201	13.4572	13.7038	13.9804	13.8713	14.117	13.717
HSP90B1	14.1504	13.9399	14.0074	13.9468	14.0201	13.9144	13.8316	13.821	14.1671	13.9994	13.3674	13.8713	14.0973	14.1053	14.0159	13.9328	13.67	13.5402	13.7412	13.8392	13.7907	13.9994	13.7676	14.0736	13.6849	13.8105	13.9202	13.9879	13.8316	13.9034	13.9543	13.6167	13.7581	13.9994	14.3144	13.9399	13.4789	13.8755	14.0429	13.8529	14.2745	13.9581	13.7328	14.2307	13.8174	13.8861	14.0588	13.8713	13.8316
SH3BGRL3	13.4845	13.4572	13.3699	13.4034	13.6785	13.5146	13.72	13.2934	13.6296	13.6051	13.8423	13.8496	13.0421	13.7074	13.7844	13.8569	13.7974	13.9804	13.7974	13.814	13.821	13.281	13.7353	13.2714	13.3901	12.9852	13.3982	13.691	13.4128	13.7743	13.5516	13.8248	13.2776	13.5968	13.5913	13.7777	14.203	13.7232	13.4128	13.8408	13.2833	14.0506	13.7139	13.4544	14.4647	14.0036	13.9653	13.7353	13.9804
VCL	13.2789	13.4954	12.9527	13.8248	13.1878	13.0521	13.066	13.6381	13.4817	13.4282	13.5146	13.2052	13.0995	13.2789	13.5709	13.5766	12.6167	13.4762	13.0952	13.3572	12.8708	13.0136	12.814	12.5163	12.6572	13.4205	12.5825	12.8164	13.4532	12.8038	12.9083	13.2789	13.5626	13.9503	13.922	13.3419	13.6537	13.922	13.6818	14.6738	13.8496	14.0321	13.1371	13.7074	13.8861	13.6818	13.9842	14.0506	13.3852
MBD4	14.0662	13.673	13.418	13.3572	13.931	13.4366	13.691	13.8897	13.6635	13.3864	13.4007	13.8285	14.1504	14.1088	14.2184	14.1053	14.3376	13.8825	14.0506	13.8039	14.09	14.5784	14.0159	14.8007	14.347	14.4549	14.1088	13.8039	14.4358	13.7328	13.6473	13.7693	14.0626	13.5146	13.5626	13.6235	14.8132	13.2214	13.2763	14.0159	13.46	14.8838	14.0662	13.5597	13.1986	13.0012	13.0298	13.4034	12.2377
SLC35E1	14.0074	13.7479	13.657	13.588	13.6381	13.6108	13.6715	13.9543	13.9034	13.5824	13.9879	13.3723	13.4128	14.1388	13.8605	14.0472	14.2521	13.9431	13.821	13.554	14.2099	13.5968	14.227	14.727	14.7092	13.657	13.9562	13.9076	14.4851	13.549	13.3953	14.6026	13.7844	13.5319	13.2883	13.5652	13.6381	13.1178	13.6235	14.3062	13.4653	14.0813	14.5456	13.0651	12.9598	13.5444	13.0226	13.771	12.4309
RUNX3	14.3062	14.2521	14.2099	14.0775	14.3333	14.764	14.4597	14.3859	14.055	14.2521	14.4692	13.6411	14.2925	14.53	14.6457	14.5808	14.2053	14.4597	14.919	14.4549	14.764	14.4692	14.2745	14.4269	14.0937	14.4127	14.6516	14.5254	14.2053	14.3423	14.1709	13.691	13.7549	14.4504	14.3085	13.9292	14.1053	14.1835	13.67	13.4231	13.9	13.6396	14.3062	13.9693	13.7139	13.821	13.6081	13.7105	14.3062
LOC645436	14.1544	14.196	13.9581	13.6818	13.7412	13.5402	13.9399	14.3287	14.235	14.6457	13.6021	14.2476	14.4549	14.0136	14.3107	13.9034	14.1753	13.893	14.2569	14.5057	13.6108	14.5006	13.7549	13.9617	14.1299	15.0468	14.3423	14.4504	13.9769	14.3571	14.6913	13.4845	14.2652	13.7328	14.1753	14.1632	14.0813	13.9956	13.8755	13.8496	14.3815	14.5971	13.5516	14.3376	13.8496	13.8073	13.7074	13.814	14.117
LOC646630	13.893	13.864	14.0114	14.0036	13.8569	14.1425	13.9144	13.7942	13.7676	13.8316	13.8965	14.1343	13.8392	14.0662	13.9399	13.9431	13.9399	13.6296	14.0114	13.9503	14.0626	13.7139	13.7328	13.7266	13.9653	14.0472	13.7809	13.8496	13.814	13.7444	14.2788	14.0626	13.8357	13.8825	13.9879	14.0363	14.07	13.7942	13.9581	13.4762	13.8713	13.7643	13.9076	13.7006	13.5263	13.8713	13.821	13.9653	13.9693
ATP5I	13.771	13.9363	13.9363	13.6444	13.9769	13.8791	13.7809	13.3297	13.7412	13.9733	13.8713	13.738	13.4082	13.8755	13.7875	14.0201	13.6381	14.0937	13.9144	13.821	14.07	13.8392	13.8965	13.6081	13.8174	13.7297	13.5766	13.9468	13.8357	13.7006	13.5939	13.6537	13.6296	13.8174	13.7412	13.814	13.7974	13.7907	14.055	13.7809	13.8825	13.6503	13.8605	13.7412	13.7297	13.9076	13.9786	13.7809	14.0114
PLSCR3	13.8569	13.7581	14.1504	14.0363	13.9804	14.113	13.8983	14.024	13.9842	13.8423	13.922	13.7907	13.7366	13.5444	13.7328	13.4153	13.6537	13.6266	13.8392	13.6411	13.7777	13.5458	13.8825	13.3497	13.7139	13.7777	13.7444	13.6138	13.5968	13.7609	13.8713	14.0813	13.7328	14.0588	13.698	13.691	13.5277	13.4445	13.9252	13.493	13.8676	13.5626	14.07	13.738	13.6635	13.6881	13.8605	14.4504	13.8755
EIF4G2	13.9202	13.9144	13.3801	13.738	13.4845	13.5794	13.5993	14.0856	13.821	13.8005	13.6785	13.9076	13.9328	13.7875	13.9485	13.7353	13.6785	13.7444	13.7549	13.7777	13.5263	14.0588	13.7777	13.9468	13.7609	13.9617	14.0281	13.6381	13.8423	13.821	13.738	13.6351	14.2569	13.7743	13.657	13.9184	13.6881	14.0472	13.8316	13.8174	14.1709	14.2145	13.2484	13.7353	13.5119	13.9399	13.5709	13.5319	13.8392
SPOCK2	14.1219	14.2429	14.6073	14.2307	14.5057	14.2925	14.2569	14.1753	14.3423	14.3724	14.2476	13.5458	14.3997	14.0506	14.0506	13.7844	13.9202	14.113	14.4738	14.3107	13.7974	14.055	14.0472	14.2569	14.0588	14.2521	14.4177	14.4316	14.1709	13.6758	14.235	13.8496	14.4692	14.2698	13.9399	13.72	13.8569	13.9503	14.1014	13.1435	14.4795	13.6202	13.8676	13.5968	13.7232	13.9769	13.8965	14.1262	13.7444
HNRPA2B1	14.07	13.7942	13.7232	13.8605	13.7074	13.3074	13.4059	13.5824	13.5036	13.7777	13.2052	13.8461	14.0588	13.418	13.3497	13.3876	13.3953	13.5064	13.2833	13.4653	13.4902	13.9184	13.224	13.167	13.4519	14.1875	13.2763	13.3953	13.6296	13.7038	14.0569	13.6943	14.0662	13.6758	14.0937	13.8496	14.2099	13.9543	13.799	13.9144	14.0775	14.4127	13.6818	14.1671	13.4338	13.7875	13.7844	13.8357	14.0159
ATP5G2	13.864	14.024	14.1299	13.8423	13.7777	13.7266	13.588	13.4257	14.1875	13.9915	14.0074	14.0588	13.893	13.9994	13.72	13.7412	14.0074	13.9144	13.9915	14.0588	13.8461	13.7479	13.5319	13.6602	14.1014	13.7844	13.588	14.1262	13.7676	14.0201	14.0281	13.738	13.7074	13.6943	13.7676	14.0937	13.7743	13.9581	14.0856	13.5851	13.9769	13.5263	13.6296	13.8423	13.6669	13.922	13.7328	13.738	13.8825
CAPZA1	13.7777	13.1901	12.9335	13.3771	13.3074	12.9634	13.1585	13.5939	13.418	13.3319	12.8689	14.0396	14.0506	12.7684	13.0693	13.3648	13.5345	13.1098	13.067	13.236	13.0521	13.7105	13.0459	13.1519	13.351	13.9693	13.3594	13.0075	13.5319	13.8105	13.5091	13.814	13.7907	13.1694	13.7232	13.4679	13.7512	13.6411	13.6326	13.8825	13.5402	14.807	13.4995	14.5352	13.4981	13.864	13.8461	13.8755	14.0506
RPL14	14.2974	13.8569	14.5556	14.1464	14.2007	14.2184	14.2145	14.3423	14.0937	14.5006	14.5658	13.1057	13.2508	13.9769	13.738	14.1835	14.3235	14.1262	14.377	14.4795	14.024	13.6669	14.3674	14.1921	14.0736	13.2192	14.2925	14.6405	13.9543	13.2739	13.4628	13.9804	14.0856	13.9733	13.1108	13.7693	12.8473	13.9076	14.6235	13.1351	14.0973	13.1501	14.2974	13.5119	14.2145	14.1709	13.9956	13.9	13.5263
GPR1	14.0281	13.588	13.7105	13.4817	13.9076	13.5993	13.9184	13.9751	13.7549	13.5709	13.7328	13.1763	13.6411	14.2698	14.0662	14.1343	14.3018	13.9292	14.1425	13.8248	14.4549	14.0159	14.2429	14.7337	14.3622	13.6138	14.1504	14.1053	14.347	13.46	13.3522	14.1425	14.024	13.5993	13.2314	13.657	13.673	13.0693	13.4887	14.1343	13.4519	13.8073	14.1219	13.0459	13.3002	13.2689	13.3594	13.5968	12.41
CD3D	14.1053	14.1544	14.5504	14.4127	14.4358	14.07	14.4269	14.055	14.1219	14.53	14.1791	13.864	13.9292	14.113	13.8569	13.4981	13.9617	14.196	13.814	14.2925	13.549	13.9543	13.864	13.8965	13.9956	14.4954	14.07	14.0626	13.6818	13.5234	13.7643	13.8174	14.34	14.4851	13.7875	13.3953	13.9034	13.7412	14.4269	12.9908	14.5157	13.4338	13.9363	13.9144	13.4366	14.1388	14.024	14.3815	14.2429
MKRN1	13.4034	13.4282	13.4902	13.657	13.3395	13.8676	13.4628	13.8005	13.3674	13.4628	13.6108	13.4653	13.5516	13.4679	13.5064	13.7105	13.4628	13.4338	13.6669	13.5968	13.3419	13.4628	13.5737	13.6235	13.5913	13.6818	13.7139	13.2508	13.46	13.6381	13.4495	13.2833	13.4082	13.4572	13.3074	13.5571	13.3074	13.4704	13.7105	13.4704	13.4817	14.0036	13.2909	13.3723	14.8007	13.7777	13.6444	13.3674	13.3346
LOC643287	14.2184	14.1587	14.5865	13.4338	13.6669	13.4034	13.738	13.4544	13.9994	14.1299	14.2184	13.1036	13.7743	14.3144	13.8039	13.8897	14.0321	14.0626	14.0588	14.1219	14.2429	13.5794	13.493	14.4127	13.9328	13.8039	13.5091	14.1921	14.1219	13.657	13.5824	14.117	13.9363	13.4338	13.7038	13.7844	13.1435	14.0321	14.2099	13.4628	14.2521	12.9598	14.2745	13.46	13.8965	13.717	13.7512	14.5109	13.4981
CECR1	13.3648	13.5939	13.3876	13.673	13.6537	13.5652	13.549	13.3901	13.9292	13.2599	13.2976	13.9617	13.7549	13.3699	13.7006	14.0626	13.4679	14.1425	13.6818	13.5234	13.717	13.3273	13.5652	12.9468	13.5431	13.1986	13.5178	13.4231	13.4628	13.3367	14.0429	14.0159	13.5751	13.6138	13.7743	14.0114	14.8007	13.7266	13.3346	13.6602	13.6537	14.1464	13.3594	13.922	13.3852	13.5571	13.6669	13.2883	14.0396
TCEB2	13.6202	13.7676	13.7875	13.7006	13.8461	13.8529	13.7006	13.4628	13.6444	13.5993	13.7907	13.72	13.5993	13.7549	13.8105	13.6881	13.5968	13.8174	13.6943	13.7266	13.922	13.4128	13.6635	13.4104	13.5091	13.5263	13.4954	13.698	13.6669	13.8005	13.6007	13.5458	13.7297	13.6818	13.738	13.7693	13.7549	13.6818	13.7777	13.771	13.5516	13.3194	13.7444	13.7743	14.1053	14.1464	14.2606	13.7643	14.0973
TUBA1C	13.8073	13.6351	13.5597	14.1709	13.3273	13.3273	13.8605	13.7676	13.9399	13.8713	13.9292	14.1544	13.7266	13.6602	13.691	13.5263	13.5626	13.5794	13.3273	13.7512	13.3052	13.5206	13.4954	13.2789	13.6993	14.2099	13.9503	13.67	13.5851	14.0363	14.1544	13.4902	13.3297	13.6411	13.9328	14.2745	13.7643	13.8301	13.5292	13.5968	13.9693	13.3699	13.568	14.0662	14.1425	13.7581	13.5263	13.5824	13.9
GNLY	14.9316	15.2088	13.5206	13.9292	14.7763	14.5808	13.7139	13.5319	12.1461	14.5057	14.2606	13.7232	14.2007	14.9018	14.227	15.0726	12.41	14.1464	14.5704	13.9363	14.6457	13.9653	13.2169	13.8676	13.1786	14.0736	14.6235	14.1544	13.3801	13.8897	13.9994	13.6635	13.0995	14.8576	15.2169	13.9363	15.4078	14.8269	14.0813	13.061	12.9793	13.7875	13.7038	13.9879	13.5652	14.2569	13.4034	13.8174	14.6405
MAGT1	13.7844	13.6266	13.5036	13.3876	13.7844	13.4059	13.5794	13.9292	13.6202	13.5036	13.4731	13.4231	13.5709	14.1504	14.0626	14.0856	14.2629	13.7942	13.8825	13.7643	14.0662	14.3524	13.9769	14.9757	14.2836	14.2184	14.0363	13.9034	14.4954	13.5292	13.7479	13.8676	14.2227	13.4059	13.6849	13.5373	14.4381	13.1946	13.2664	13.9399	13.4679	14.1544	14.1088	13.3901	13.1118	12.9102	12.9468	13.2291	12.1024
HLA-E	13.6537	14.2388	13.9879	13.814	13.7232	13.6021	13.5009	13.2909	13.9879	13.7139	14.3062	13.3248	13.4981	14.1464	13.5178	13.821	13.46	13.9994	13.6881	13.9202	13.9184	13.3147	13.1457	13.2314	13.5206	12.8171	13.7581	13.9617	13.4789	13.4954	13.4418	13.568	13.4034	13.8039	13.6021	13.9328	13.4902	14.2099	13.9842	14.024	13.549	12.5617	13.7412	13.5263	14.2974	14.1587	13.691	13.5431	14.0775
LOC728358	11.7108	14.8444	14.09	15.6456	13.2622	15.7425	16.8773	14.2875	12.8388	11.2029	12.9345	10.5428	10.4935	14.0321	14.7155	11.7281	11.7701	12.34	12.0799	14.1343	11.865	11.5641	14.3287	12.1179	11.6703	13.6167	14.6073	12.1645	13.67	16.009	13.5766	12.581	13.8105	12.7505	15.4222	14.9371	13.6618	15.0605	12.6197	14.8697	12.6302	14.9511	12.8616	13.1775	12.292	12.1966	15.3844	12.6988	10.4198
LOC644330	13.9202	13.6943	13.4007	13.5794	13.4954	13.8755	13.9076	13.9842	13.9617	13.9292	13.7942	13.3699	13.2029	13.5009	13.6818	14.0074	13.8825	13.7297	13.7297	13.8316	13.5178	13.4082	13.7844	13.4902	13.7479	13.3876	13.9879	13.7353	13.4153	13.5458	13.5709	13.893	13.7875	13.5652	13.6296	13.5913	13.418	13.6669	13.549	13.6503	13.6202	13.3982	13.5939	13.5766	13.698	13.6202	13.771	13.3747	14.1875
SERPINA1	13.6296	13.8461	13.0565	13.2508	12.928	12.3678	12.8188	13.2554	14.0201	13.4104	13.7581	14.7458	13.6444	13.447	13.0718	13.7266	13.2554	13.7074	13.2339	13.3901	13.7412	13.6503	13.0565	13.0136	13.1271	12.8528	13.1808	13.1986	13.5824	13.9468	14.4177	13.8825	13.6818	13.0841	13.5091	14.5254	14.0472	13.9994	13.4817	14.0856	13.4873	14.196	13.5431	13.8861	13.281	14.09	14.0363	13.4544	14.6799
LOC283412	14.1088	14.0429	14.1671	13.9915	14.0159	14.3062	13.9956	14.0281	14.2388	14.2812	14.09	13.4205	13.5968	13.9879	14.1262	13.9399	13.7328	13.8316	13.9184	14.0626	14.0937	13.3747	13.8695	14.0281	14.2007	13.67	13.8316	14.2227	13.8965	13.6411	13.4034	13.9144	14.0429	13.9431	13.6602	13.5851	13.3674	13.893	14.5109	13.3052	14.1464	13.3852	13.9994	13.6081	13.4873	14.0662	14.1299	13.9399	13.9842
CSNK1G2	13.9076	14.0813	14.1709	13.9617	13.8897	13.8713	14.0588	14.0396	13.7809	13.6818	13.7549	13.236	13.3074	13.7139	13.5597	13.8392	13.7444	13.7139	13.46	13.5626	13.657	13.3635	13.9202	13.9363	13.7353	13.3852	13.8461	13.673	13.6537	13.2121	13.1138	14.0363	13.9	14.0813	13.7479	13.4845	13.0459	14.0201	13.9693	13.6669	13.7974	13.4257	13.8529	13.4653	13.9581	13.9994	13.7479	14.227	13.8357
SEC61B	13.7974	13.7512	13.5373	13.4572	13.8285	13.7643	13.7074	13.4418	13.6235	13.6635	13.5373	13.8549	13.6296	13.554	13.6785	13.698	13.4445	13.4082	13.5939	13.5206	13.7875	13.7353	13.6849	13.4366	13.588	13.7609	13.4418	13.6351	13.6051	13.5626	13.7074	13.8423	13.771	13.4789	13.8825	13.7907	14.0074	13.8825	13.7907	13.7512	13.7006	14.0281	13.6167	13.7581	13.6351	13.8423	14.0321	13.7074	14.1262
CMTM7	13.5431	13.8496	13.9328	13.7444	13.9956	13.8005	13.9653	13.6635	13.6411	13.7549	13.814	13.7844	13.8105	13.2268	13.6381	13.4653	13.5939	13.5737	13.5091	13.7074	13.6266	13.4817	13.7444	13.2029	13.6602	13.6669	13.67	13.5851	13.4007	13.9076	13.6007	13.9184	13.6235	13.8248	14.09	13.7328	13.8897	13.6473	13.6381	13.8039	13.6503	13.4704	13.821	13.8174	13.554	13.7643	13.5571	13.6235	14.0429
ID2	13.6602	13.8357	13.5458	13.0799	13.5146	14.1262	14.0159	13.8965	14.4221	13.7328	13.241	13.911	13.9769	14.4083	14.0412	14.2007	14.2184	14.2606	14.6516	14.2652	14.6625	14.6799	14.5556	14.113	14.117	14.0036	14.347	14.1088	14.0736	14.7697	14.4795	13.8316	14.0201	13.5119	13.72	14.1875	14.3571	13.5431	13.7232	13.7139	13.4007	13.6396	13.6108	13.6381	14.0775	13.5913	13.1057	13.093	13.7676
TMBIM4	13.493	13.7353	13.4059	13.6849	13.9252	13.2643	13.6108	13.1923	13.4366	13.3747	13.3827	13.8755	13.6266	13.1371	13.1986	13.4338	13.281	13.4418	13.2739	13.253	13.5571	13.224	13.2291	12.8425	13.3419	13.1923	13.236	13.2859	13.588	13.4338	13.4679	13.9842	13.4257	13.493	13.5851	13.5206	13.5626	13.5913	13.9915	14.07	13.771	13.6537	13.8248	13.9034	13.46	13.5597	13.7232	14.2007	13.8461
HLA-DRB6	13.9804	12.6072	14.2836	13.1967	14.4504	11.2396	13.9468	12.827	14.8007	13.322	12.9392	13.3194	13.8676	13.9693	10.9171	14.3724	14.1088	15.1871	11.4677	10.4697	14.4504	13.3635	14.7574	13.9076	13.0175	11.356	13.2833	14.7397	14.0973	14.5204	12.6118	13.6202	11.2769	13.3982	14.5658	14.3423	14.2328	14.5915	13.922	12.9852	13.3852	13.8442	14.5915	13.9431	15.2718	14.9371	11.9271	12.9543	10.3323
TKT	13.1563	13.7743	13.7006	13.8569	13.7444	13.9328	13.5652	13.7549	13.5626	13.4519	13.9617	14.115	14.055	13.4445	13.9076	14.0662	13.5064	13.7809	13.8569	13.8569	13.9693	13.8073	13.9956	13.8496	13.6635	13.4762	13.6473	13.72	13.5263	14.0114	13.8755	13.9328	13.2934	13.7676	13.4679	13.8676	13.4445	13.738	13.7844	13.7232	13.588	13.8965	13.2121	13.6444	13.5766	13.7232	13.9252	13.1293	14.0856
FGD3	13.6785	13.6444	13.8791	13.8039	14.0114	13.6051	13.4817	13.8755	13.3594	13.7038	13.9751	13.6351	13.9543	13.3497	13.3028	13.0439	13.2714	13.167	13.253	13.4205	13.5851	13.2739	13.3002	13.5597	13.4817	13.6444	13.4679	13.3852	13.4338	13.3852	13.2097	13.8461	13.4445	13.72	13.717	13.1293	12.9373	13.5709	13.9	13.7444	13.7074	13.2883	13.8316	13.8755	13.911	13.9184	14.0775	14.0736	13.7777
YWHAZ	13.8039	13.6381	13.4731	13.4153	12.8596	13.2833	13.351	13.5192	14.0321	14.0363	13.6586	13.9292	13.7809	13.9184	13.8755	13.8174	13.7074	13.6635	14.0396	13.9	13.3876	13.9769	13.3147	14.024	13.9842	14.0396	13.7297	13.821	13.7609	14.2652	14.1388	13.3771	13.3473	13.3594	13.7643	13.8529	13.4366	14.0588	13.4082	14.0363	13.9503	13.6943	13.4104	13.9	13.6381	13.7297	13.6381	13.4128	13.6108
IFI6	13.4104	13.0761	13.6881	13.253	13.2554	13.6849	13.7297	12.8634	14.2875	12.9487	13.8316	13.6108	13.2268	13.281	13.1079	14.1544	14.1464	13.4845	13.2883	13.3346	13.6602	13.2577	13.46	13.2097	13.5119	13.0799	13.0498	13.3929	13.093	13.4104	14.5915	13.6266	12.7651	13.2622	13.4519	13.9468	12.0703	13.1138	13.2934	13.5766	13.1332	12.9392	14.3724	13.5626	14.1014	13.6094	13.3002	13.5009	13.5345
DBNL	13.6081	13.5794	13.6758	13.72	13.8105	13.7942	13.7549	13.549	13.5913	13.5851	13.738	13.7512	13.6943	13.4128	13.5091	13.3747	13.3747	13.4954	13.5402	13.5292	13.4981	13.3929	13.4282	13.2751	13.3876	13.4059	13.5652	13.4034	13.3674	13.7074	13.3901	13.7479	13.3074	13.7581	13.8755	13.5319	13.2714	13.4572	13.6296	13.738	13.7353	13.6021	13.7512	13.6202	13.7479	13.9617	13.8285	13.6635	13.9184
RPRC1	13.7549	13.7266	13.7444	13.7581	13.9879	13.8897	13.7676	13.7743	13.8392	13.8529	13.864	13.7676	13.6881	13.6669	13.7581	13.5968	13.7809	13.9034	13.6503	13.8174	13.7139	13.6202	13.8569	13.5939	13.7643	13.9252	13.7006	13.5913	13.5939	13.6296	13.5036	13.8285	13.8676	13.9184	13.6669	13.673	13.2029	13.8392	13.5611	13.7643	13.6051	13.1967	13.8285	13.6669	13.7581	13.4954	13.7907	13.5516	13.8174
FAM120A	13.4679	13.698	13.6602	13.4082	13.6296	13.5206	13.4338	13.5036	13.5851	13.6381	13.4954	13.4282	13.7512	13.3901	13.5458	13.6021	13.5913	13.4902	13.2789	13.4519	13.7444	13.5709	13.1923	13.4205	13.4704	13.3497	13.3194	13.4391	13.6444	13.4775	13.5234	13.7809	13.6266	13.5516	14.1464	13.5766	13.698	13.7297	13.5178	13.7038	13.6881	13.7297	13.8423	13.814	13.447	13.6758	13.7444	13.7942	13.8897
TRABD	13.5794	13.7074	13.7266	14.1299	13.9543	14.055	13.9252	13.9503	13.4445	13.5737	13.7105	13.7139	13.6235	13.5206	13.5939	13.6108	13.814	13.5206	13.8316	13.5458	13.7676	14.1014	13.911	14.0396	13.8569	13.7907	14.1464	13.8755	13.5458	13.72	13.6943	13.6669	13.4007	13.8357	13.8605	13.3594	13.0781	13.4789	13.3747	13.6266	13.7581	13.3771	13.9503	13.9468	13.4205	13.7038	13.5993	13.8005	13.5516
EIF3K	13.691	13.814	14.0856	14.0201	13.9503	13.9842	13.8248	13.8461	13.8529	14.0036	13.893	13.6444	13.5178	13.7297	13.8423	13.5709	13.7676	13.7581	13.9076	13.9804	13.8755	13.7038	13.9292	13.6785	13.8248	13.8676	13.6537	13.8676	13.8897	13.6602	13.717	13.5824	13.8496	13.8791	13.9804	13.7609	13.8392	13.6602	14.0201	13.3839	13.8174	13.7609	13.8039	13.673	13.5737	13.8285	13.7412	13.7232	13.7412
ARPC3	13.673	13.7313	13.2677	13.2214	13.0995	12.9373	12.9175	13.322	13.5234	13.4572	13.2934	14.1014	13.821	13.691	13.7297	13.6051	13.8569	13.5263	13.4704	13.8005	13.5939	13.8791	13.3319	12.7324	13.6202	13.9543	13.0459	13.738	13.7549	13.9994	14.0506	13.4817	13.7609	13.1923	13.8248	14.0756	14.1343	14.0281	13.4572	13.8005	13.6635	14.2429	13.7353	14.0396	13.7609	13.8755	13.9292	13.7038	14.2652
NONO	13.7581	14.0159	13.6021	13.8755	13.9034	13.6669	13.6537	14.0036	13.6266	13.893	13.6167	13.8192	13.9842	13.7412	13.4628	13.6411	13.7139	13.6444	13.72	13.7038	13.5652	13.893	13.6602	14.0813	13.8755	14.07	13.8105	13.6849	13.8825	13.8461	13.6202	13.2763	13.8248	13.6108	13.8039	13.7139	13.568	13.8248	13.7139	13.7743	13.8605	13.9804	13.2643	13.5178	13.3122	13.698	13.5968	13.4981	13.698
CSDA	13.2291	13.3546	12.7305	12.7651	13.1036	13.236	13.2789	13.1808	13.4308	13.0545	13.2508	12.9298	13.0155	13.1225	13.4282	13.9184	13.3273	13.3747	13.0317	13.5516	13.4418	13.4704	13.1878	13.241	13.253	13.2909	13.6381	13.5431	13.2859	13.6081	13.1585	13.0298	13.3771	12.8319	13.568	13.5146	13.2121	13.7777	13.1986	13.4257	13.3052	13.4817	13.2554	13.4366	15.3844	13.6326	13.8529	13.3122	13.8285
LOC643031	14.0321	14.0201	13.9034	13.7105	13.5292	13.5064	13.241	13.3172	13.8248	13.9184	13.5597	13.6503	13.4007	13.9956	13.717	14.2875	13.5794	13.9653	14.2429	14.5006	13.6881	13.7512	13.4902	13.911	14.0281	13.493	13.3319	13.6818	13.7297	13.8423	13.5119	12.9579	13.6602	13.7139	13.5206	13.9915	14.203	13.9328	13.5766	13.418	14.1504	13.6138	13.1606	14.5606	13.8039	13.5119	13.3097	13.8105	12.9026
ICAM3	13.598	13.5766	13.6635	13.7074	13.6503	14.1088	13.8039	13.6296	13.3929	13.657	13.9431	13.6758	14.07	13.9034	13.9879	13.5319	13.322	13.3395	13.7353	13.7232	13.6411	13.6635	13.5345	13.8337	13.4789	13.6081	13.5968	13.7297	13.4445	13.8755	13.7777	13.7038	13.7038	13.771	14.0506	13.493	13.9994	13.5345	13.8073	13.3723	13.7907	13.4366	13.6381	13.7676	13.821	13.4153	13.9503	13.4338	13.3876
GSTO1	13.3172	13.2976	13.2384	13.4981	13.4282	13.418	13.447	12.8109	13.1735	13.1585	13.2268	13.4338	13.0952	13.0175	13.4082	13.5516	13.3497	13.6881	13.5319	13.2859	13.3319	13.2052	13.5993	12.4777	13.0421	12.7936	13.241	12.9242	13.2508	13.2909	13.1967	13.5794	13.5009	13.3661	13.4231	13.5292	13.6235	13.771	13.4153	13.9879	13.235	13.5091	13.5993	13.7297	13.493	13.7809	13.9076	13.6602	14.0626
CEBPD	13.1271	13.6602	13.067	12.7488	13.5851	13.3929	13.5292	12.7391	13.4128	13.0995	13.3852	13.5516	13.5373	13.5794	13.814	14.0506	13.7353	13.4817	13.6266	13.7875	13.9543	13.7328	13.673	13.7232	13.5234	12.6953	13.493	13.6021	14.0074	14.0074	13.7266	13.2577	12.9579	13.5571	13.8496	13.5009	14.6516	13.3319	12.8708	14.1425	13.235	13.691	12.602	13.4418	13.0032	13.0258	13.8676	13.1247	13.493
ARF1	13.4495	13.4981	13.6943	13.5993	13.8423	13.9252	13.7907	13.6537	13.7353	13.7074	13.8605	13.6007	13.4762	13.7444	13.6537	13.673	13.5431	13.6326	13.9328	13.8825	13.771	13.493	13.6473	13.46	13.5824	13.4954	13.6881	13.6411	13.5036	13.5597	13.5571	13.5851	13.2314	13.6202	13.7444	13.6167	13.4519	13.6849	13.5345	13.6473	13.4391	13.5178	13.3814	13.281	13.7844	13.4007	13.6849	13.5146	13.6635
DOCK2	13.6473	13.6138	13.6473	13.6351	13.698	13.6881	13.5968	13.7777	13.6758	13.6602	13.3497	13.8248	13.7609	13.6785	13.5968	13.4231	13.5091	13.5292	13.6296	13.4338	13.5968	13.6537	13.5824	13.4418	13.5953	13.7139	13.7038	13.5146	13.5794	13.5402	13.3827	13.5652	13.554	13.7875	13.7105	13.7809	13.0651	13.8713	13.5866	13.698	13.5737	13.3097	13.6602	13.5206	13.3801	13.7105	13.6818	13.6296	14.0201
TUBB1	12.867	12.9468	12.7505	13.9431	12.2477	12.2301	12.4437	13.061	12.9354	12.7702	13.1539	12.7702	12.4173	13.067	13.6326	13.2327	12.7081	13.3497	12.8802	13.3446	11.866	13.0237	12.488	11.1167	12.3625	12.9411	12.0494	12.488	13.2599	13.0421	12.0692	12.2513	13.4817	13.673	13.9693	13.2303	13.8357	13.8861	13.5709	14.3376	13.5345	14.4043	12.0647	14.8509	14.7763	13.8569	13.9184	14.2836	11.9815
MIF	13.6411	13.5458	14.3018	13.9144	14.0994	14.0973	14.1544	13.7643	13.691	13.6081	14.1088	13.6266	13.4166	13.9915	13.7074	13.8039	13.9034	13.8861	13.7328	13.8605	14.0074	13.3097	13.8316	13.7297	13.6296	13.4257	13.5319	13.9543	13.8005	13.5319	13.554	13.6818	13.7974	13.922	13.4572	13.3876	13.4954	13.5737	13.9956	12.8758	13.717	13.1036	13.8897	13.1563	13.6411	14.0301	13.8039	13.9449	13.5431
LDHB	13.9617	13.9431	14.3947	13.9769	13.6818	13.6266	13.4845	14.1587	13.814	14.4083	13.8676	13.4366	13.771	13.7676	13.7549	13.3052	14.1014	13.6021	13.8039	13.8965	13.427	13.9503	13.8392	13.8755	14.0472	14.3571	13.7412	13.8948	14.0281	13.4082	13.893	13.8039	14.6235	13.7281	13.1629	13.4519	13.6758	13.8791	14.5204	13.3147	14.3062	13.9328	12.9487	13.6537	13.4572	14.0074	13.7266	14.0588	13.067
NDUFB8	13.5263	13.7844	13.8316	13.7974	13.7643	13.8861	13.8392	13.588	13.5431	13.9693	13.8569	13.8192	13.6635	13.6138	13.6351	13.549	13.4902	13.6602	13.691	13.6849	13.864	13.6081	13.7038	13.5766	13.6167	14.0937	13.8039	13.7074	13.5119	13.5939	13.7891	13.6602	13.6051	13.7444	14.0114	13.6602	13.4544	13.5178	13.8713	13.5146	13.72	13.4873	13.7549	13.7974	13.3147	13.6235	13.6108	13.5091	13.7809
MX1	12.7324	12.4173	13.0075	12.6865	12.6524	13.7512	13.0195	12.1064	14.4316	12.2859	13.7479	13.9915	13.0588	12.1846	12.3572	13.8755	13.9915	13.0055	12.1288	12.4367	12.6784	13.0781	13.0995	12.6524	12.4823	12.1121	12.3914	12.5291	11.8383	12.6703	14.196	13.7512	12.9468	12.8509	13.3747	12.9908	15.1944	13.4391	12.7953	13.5571	12.867	13.322	14.4043	13.1539	12.9969	13.1118	13.3052	12.8689	13.3147
SLC25A3	13.7232	13.5851	13.8423	13.8392	13.8073	13.9363	13.6351	13.6167	13.6081	13.5064	13.5064	13.2833	13.447	13.3074	13.1585	13.2714	13.2622	13.3172	13.4519	13.2508	13.2508	13.5639	13.5516	13.4059	13.6108	13.821	13.7479	13.5571	13.2714	13.5119	13.2883	13.6081	13.3097	13.7479	13.5709	13.6818	13.4153	13.5968	13.9144	13.4519	13.6473	13.6266	13.6081	13.7942	13.7875	13.9653	13.9363	13.5939	14.0472
CTSH	12.7374	13.7232	13.3852	13.2909	13.3319	13.7676	13.4704	13.7266	13.46	13.2463	13.5402	13.9503	13.3122	13.4282	13.7609	13.3953	13.7297	13.9	13.6326	13.4572	13.67	13.1878	13.6669	13.0889	13.4007	12.9561	13.2181	13.4418	13.5009	13.236	13.5458	13.8392	13.5402	13.5766	13.7907	14.1343	13.911	13.9617	13.7743	13.7907	13.2789	13.7809	13.1118	13.3699	13.4007	13.4059	13.9431	13.67	13.8861
ARHGEF18	13.8529	13.4257	14.1088	13.7907	13.7266	13.9399	13.8897	13.9184	13.4731	13.9034	13.691	13.6381	14.0036	13.6758	13.6167	13.4391	13.8605	13.5458	13.6202	13.9543	13.5345	14.0201	13.8423	14.0937	14.0201	14.227	13.9292	14.0159	13.7743	14.0775	13.9733	13.554	13.8005	13.7974	13.814	13.3572	13.3248	13.4817	13.5206	13.6167	14.024	13.568	13.7809	13.6818	12.989	13.6051	13.4653	13.8605	13.2372
SLC7A7	13.3052	13.4445	12.9191	13.4257	13.0155	13.0175	12.7324	13.1763	13.6108	13.0799	13.4231	14.1632	13.5913	13.2192	13.2169	13.5824	13.2097	13.6993	13.5234	13.2934	13.7232	13.2076	13.3273	13.0155	13.2484	13.1606	13.3723	13.0258	13.3367	13.6785	13.4338	13.5146	13.3801	13.3661	13.7942	14.235	14.024	14.1504	13.3248	14.2745	13.1843	14.0662	12.9427	13.8461	13.1735	13.5402	13.8248	13.1519	13.9879
FKBP14	13.5851	13.4789	13.0439	13.1629	13.6021	13.1383	13.3122	13.698	13.4104	13.224	13.322	13.3346	13.9581	14.0036	13.7942	13.7461	14.1299	13.4628	13.7743	13.6021	13.893	14.4903	13.6266	14.6738	14.0973	13.8392	13.893	13.4845	14.4504	13.4902	13.1629	13.6108	14.0472	13.1351	13.3827	13.2957	14.4127	13.0258	12.8616	13.9431	13.2169	14.3376	13.9252	13.1312	12.9694	12.7003	12.4466	13.1854	11.7936
CSF3R	13.0317	13.5516	12.8935	13.2714	13.3248	13.4817	13.5091	13.3622	13.5939	12.9335	13.493	13.7549	13.3723	12.993	13.4366	13.0498	13.2214	12.5664	13.2554	13.4954	13.0718	13.2314	13.4789	12.9834	13.0761	13.0521	13.5824	12.9316	13.3648	13.8039	13.1694	13.7353	13.1479	13.6167	13.9581	13.7643	13.1036	13.568	13.067	13.673	13.0588	13.5036	12.5617	14.2745	14.7514	12.814	14.1219	12.7047	13.6411
LOC283345	13.9956	13.6021	14.8838	14.1088	14.1875	14.09	14.3947	13.9076	13.9733	14.1709	14.5157	13.1118	13.2714	13.9328	13.7232	13.5652	13.8461	13.7328	13.8529	13.9915	14.2925	13.5319	14.0036	14.1219	14.2388	13.4789	13.7232	14.3235	13.8569	13.9617	13.4308	14.1262	13.9733	14.1632	13.5597	13.1923	12.9615	13.4519	14.5971	12.5766	14.1088	12.9969	14.1343	13.063	13.6881	14.0159	13.9581	14.1299	13.4391
GRN	13.1923	13.3297	13.2643	13.5431	13.5263	13.8039	13.6715	13.3028	13.4902	12.9543	13.3122	13.5292	13.1878	12.9812	13.4519	13.5597	13.1138	13.4205	12.9447	12.9752	13.0974	12.7855	13.691	12.501	13.0032	12.1751	13.3002	12.6347	13.3074	13.3801	12.9468	14.0094	13.4544	13.7809	13.8105	13.6202	13.0439	13.7038	13.1629	13.8861	13.0136	13.1178	13.5234	13.1854	13.5597	13.5666	14.1671	13.5178	13.9956
CIRBP	13.8897	14.3571	14.5204	14.0114	13.7297	14.4597	14.4358	14.4358	14.0159	14.4549	14.2307	13.3319	14.1388	14.4692	14.2652	13.9956	14.2629	14.1587	14.4177	14.3947	14.0856	14.3947	14.2227	14.5556	14.576	14.6179	14.5556	14.5808	14.3333	14.3947	14.4221	13.4679	13.447	13.9252	13.9363	14.0281	13.6669	13.5626	13.8496	12.987	14.0472	13.6296	13.9328	13.0479	13.6943	13.4731	13.2121	13.1539	13.3699
DNAJC8	13.8174	13.67	13.6296	13.7412	13.738	13.657	13.4282	13.5292	13.6326	13.7743	13.6235	13.7038	13.5794	13.6537	13.3473	13.2327	13.4007	13.5431	13.5968	13.6473	13.3546	13.3074	13.1854	13.5064	13.4954	13.6296	13.4104	13.4679	13.6381	13.3771	13.3028	13.4059	13.2577	13.8005	13.3699	13.4704	12.7587	13.6281	13.8897	13.5993	13.8316	13.0952	13.5319	13.4628	13.1946	13.7479	13.6021	13.7328	13.5709
NBPF20	14.3905	14.0736	13.7512	11.997	12.6334	12.6006	13.2291	12.1539	13.5709	13.4308	13.9468	13.4679	14.1875	13.9468	13.4257	13.6537	13.1047	13.2484	13.0382	13.1057	14.1088	14.1875	12.5918	14.4692	13.2957	14.3168	13.3248	13.4338	14.3107	13.5737	13.3876	14.3815	13.8605	12.4124	14.2053	13.8461	14.3193	14.07	14.2307	14.5204	13.9956	12.8868	14.4404	13.0195	12.4295	12.9949	13.2484	14.1632	13.0865
CCDC72	13.738	13.7139	13.9733	13.8529	13.8791	13.9653	13.8357	13.5913	13.8713	13.7643	13.8073	13.3446	13.3901	13.922	13.8073	13.5345	13.5119	13.8461	13.8461	13.7743	13.8357	13.5091	13.8357	13.6326	13.7232	13.46	13.5626	13.864	13.6473	13.6351	13.4153	13.6021	13.72	13.893	13.5036	13.549	13.2833	13.6444	13.9543	13.3419	13.7512	13.3367	13.698	13.5851	13.5626	13.5939	13.5851	13.9449	13.6818
SLC4A5	13.447	13.2957	13.7643	13.6326	13.6326	13.2976	13.568	13.4205	13.5737	13.3901	13.4572	13.1901	13.5206	13.9431	13.3367	13.5993	13.6351	13.3852	13.7512	13.3052	13.6669	13.5939	13.8605	14.3287	14.0662	13.4845	13.8861	13.8713	14.0626	13.2957	13.2763	13.7643	13.1057	13.3827	13.3419	13.4007	12.9771	12.7241	13.5064	13.7328	13.2689	13.3827	13.657	13.3419	13.6473	13.4282	13.4445	13.568	12.5384
MTCH1	13.6444	13.7313	13.8005	13.7609	13.4572	14.0429	13.8285	13.9431	13.7074	13.7353	13.6444	13.9034	13.8965	13.4628	13.4007	13.8105	13.7512	13.4166	13.7809	13.5091	13.447	14.0937	13.9363	13.7549	13.9363	14.0775	14.1709	13.771	13.6849	13.8316	13.9431	13.4338	13.691	13.67	13.9543	13.7512	13.8005	13.7549	13.4104	13.6326	13.7444	13.5824	13.5146	13.4704	13.5968	13.4338	13.3473	13.3827	13.3074
ATP6V0B	13.2599	13.4418	13.3194	13.5009	13.6351	13.5939	13.4762	13.2689	13.5516	13.0781	13.7232	13.8073	13.201	13.2029	13.2599	13.5939	13.3248	13.5036	13.3771	13.2214	13.2976	13.1138	13.7512	13.2169	13.0781	12.9427	13.3699	13.2739	13.1574	13.5431	13.5178	13.698	13.2169	13.4902	13.6202	13.6635	13.6138	13.6167	13.493	13.568	13.2643	13.6758	13.5794	13.8791	14.0321	13.8039	14.0281	13.1786	13.8529
CPVL	13.3572	13.3419	13.0095	13.4366	13.5737	13.2714	13.3771	13.4981	13.7328	13.2957	13.2145	14.2875	13.9431	13.1878	13.3723	13.3982	13.7105	13.6381	13.1694	13.3982	13.5402	13.5023	13.3901	12.8716	13.3929	13.3801	13.4007	13.3982	13.5709	13.691	13.1118	13.4641	13.9842	13.4679	13.9252	14.2145	13.9804	14.1299	13.2052	13.7844	13.5597	14.3997	13.1563	14.235	13.3982	13.3297	14.2053	12.867	13.8713
IFNGR2	12.987	13.1519	12.7702	13.1832	13.2384	13.1236	12.9083	13.1694	12.9793	12.814	12.827	13.6051	13.322	12.9652	13.0117	13.1199	13.2145	13.5913	13.0298	12.989	13.1138	13.5373	13.3473	12.9793	12.9714	12.6988	13.2883	13.1225	13.2554	13.7105	13.2577	13.6326	13.3747	13.0521	13.3929	13.4731	13.2169	13.5146	13.0739	14.0201	12.8363	13.3901	13.4445	14.1053	13.3674	13.4902	13.717	13.3801	14.1587
ARGLU1	13.9653	13.9581	13.7412	13.821	13.4544	13.5913	13.3876	13.8605	13.6943	14.0281	13.4366	13.5091	14.2145	13.5516	13.4059	13.3248	13.8005	13.5571	13.3801	13.4981	13.3648	14.0472	13.4391	13.864	13.7581	14.2606	13.9	13.6537	13.8861	13.5206	13.6051	13.0459	13.9581	13.7006	13.8529	13.6669	13.4762	13.7809	13.6051	13.6351	14.2099	13.9879	13.3901	13.4082	13.1435	13.447	13.5652	13.7006	13.281
EGLN2	13.6235	12.7905	13.4789	13.6669	13.8713	13.2097	13.1332	13.253	13.1312	13.1098	13.549	13.2554	13.3419	12.989	13.0761	12.8616	13.0889	13.0136	12.9354	13.0974	13.0339	12.928	12.9734	13.224	13.1912	12.9044	12.993	12.8596	12.9949	12.8319	12.7357	13.8105	13.1079	13.6296	13.2029	12.7835	12.9065	13.4231	13.7643	13.4034	13.3876	13.167	13.6202	13.6021	13.6785	13.9363	14.2569	14.0813	13.864
KIAA1751	13.4954	13.4519	13.2859	13.1057	13.4366	13.1118	13.3852	13.8825	13.5597	13.3497	13.3747	12.7734	13.2314	13.9804	13.8713	13.864	14.0937	13.5234	13.7479	13.4679	13.8285	13.6266	13.7232	14.7092	14.1388	13.2577	13.814	13.6081	14.2698	13.1371	13.1057	14.2227	13.864	13.3052	13.0459	13.2577	13.6503	12.9487	13.1714	13.9915	13.1479	13.8569	14.0736	12.9316	12.8902	12.9354	12.5722	13.447	12.0548
FNBP1	13.7444	13.8301	13.7328	13.5626	13.8039	13.3028	13.4205	13.5263	13.4007	13.7232	13.46	13.447	13.4653	13.3028	13.4418	13.0588	13.3622	13.5319	13.4653	13.2883	13.3771	13.6108	13.2076	13.2664	13.4128	13.8713	13.2121	13.493	13.4679	13.4653	13.7444	13.5516	13.9769	13.6444	13.8073	13.3297	13.4628	13.864	13.4445	13.5597	13.7232	13.5851	13.4544	13.3674	13.2339	13.554	13.5766	13.6444	13.6943
PSMA6	13.3747	13.5652	13.1649	13.3901	13.3297	13.2934	13.2976	13.3827	13.2291	13.2577	13.1714	13.8316	13.4873	13.1901	13.3546	13.4902	13.4731	13.5626	13.1901	13.3473	13.4445	13.3419	13.2121	12.8125	13.2133	13.8174	13.1225	13.2192	13.2097	13.5373	13.7006	13.5373	13.6381	13.241	13.5571	13.5064	13.7139	13.6281	13.5611	13.8316	13.4366	13.9733	13.3194	13.6503	13.2739	13.6669	13.5292	13.4418	13.9653
LOC440704	13.5146	13.2437	13.1923	13.2384	13.5373	13.0117	13.2052	13.3801	13.2883	13.063	13.2463	13.3876	13.6021	13.4873	13.5206	13.6669	13.8392	13.3346	13.6473	13.1854	13.7643	14.1791	13.568	14.377	13.9693	13.8073	13.6296	13.5036	13.9693	13.8529	13.4445	13.4544	13.6081	13.1606	13.3248	13.2508	14.0973	13.0278	13.1271	13.7479	13.224	14.235	13.7479	13.4059	13.0821	13.0739	12.8776	13.1332	12.5694
ICA1	13.6818	13.3097	13.6235	13.493	13.5709	13.2859	13.7105	13.3852	13.493	13.3395	13.3982	13.4981	13.7643	13.7907	13.3771	13.6785	13.7844	13.4445	13.657	13.4257	13.7266	13.7974	13.8461	14.4404	14.1425	13.8357	13.9956	13.9144	14.1835	13.447	13.3771	13.5968	13.1312	13.1808	13.2437	13.4445	13.2291	12.7003	13.3002	13.7549	13.3028	13.4954	14.0856	13.4519	13.2508	13.1079	13.1967	13.3028	12.2648
HIST1H2BK	12.8616	12.897	12.6382	13.3194	12.8304	12.651	12.7003	12.9714	13.0216	12.8029	13.2599	13.1878	12.5036	12.7148	13.2508	13.418	12.7163	13.1519	13.3522	13.061	12.9411	12.5377	12.8758	12.2036	12.8339	13.0117	12.7749	12.9298	12.8021	13.0498	12.369	12.7196	13.0761	13.2643	13.3319	13.2599	13.6618	13.691	13.3147	14.0973	13.1606	13.7074	13.2622	14.6405	14.4851	13.8605	13.6785	14.0429	12.8793
SUMO2	13.8755	13.6235	13.4495	13.1649	13.3699	13.549	13.5345	13.6021	13.4628	13.691	13.3622	13.1986	13.1371	13.4257	13.6202	13.5571	13.7038	13.6167	13.4981	13.5766	13.673	13.236	13.418	13.2339	13.4495	13.447	13.5913	13.4007	13.4817	13.1539	13.3648	13.7444	13.9468	13.3522	13.2763	13.4338	13.0317	13.8105	13.6081	13.717	13.6108	13.72	13.4391	13.1629	13.1854	13.4572	13.4572	13.5571	13.7974
EIF3F	13.7105	14.0036	14.0159	13.7479	13.8005	13.9543	13.4153	14.0506	13.6669	14.0856	13.8174	13.7643	13.9693	13.8529	13.5516	13.4059	13.7549	13.6818	13.9653	13.9202	13.7512	13.8248	13.7139	13.7609	13.7512	14.024	13.8285	14.0074	13.6266	14.0506	13.7512	13.4128	13.6758	13.7609	13.771	13.8174	13.549	13.6051	13.7609	13.1138	13.9431	13.5597	13.5064	13.5652	13.5458	13.6351	13.657	13.4873	13.554
ATP6AP1	13.2643	13.6108	13.5319	13.6051	13.7105	13.7479	13.6021	13.5993	13.4532	13.3953	13.8039	13.4082	13.3876	13.3546	13.5431	13.588	13.4205	13.493	13.493	13.4789	13.5009	13.3699	13.6818	13.1025	13.3572	13.1629	13.5474	13.3097	13.3028	13.5794	13.1236	13.4731	13.2052	13.6081	13.7809	13.6081	12.9007	13.3982	13.3097	13.4495	13.3594	13.236	13.6235	13.6167	13.5234	13.3147	13.5091	13.2554	13.6758
EIF3EIP	13.8965	14.1343	13.8897	13.7743	13.7549	13.864	13.8174	14.0363	13.8005	14.2476	13.7444	13.6818	13.7907	13.8039	13.6849	13.5292	13.549	13.5824	13.911	13.7549	13.7809	13.8174	13.7643	13.7907	14.0114	13.7549	13.9693	13.922	13.9468	13.6167	13.5345	13.5036	13.814	13.8285	13.7512	13.8423	13.2192	14.0074	13.9769	13.4104	13.9543	13.6081	13.3395	13.1178	13.1057	13.4034	13.3028	13.2577	13.67
C6orf48	13.5571	13.7643	14.1753	13.8965	13.7512	13.9769	13.6785	13.7875	13.9503	14.1014	13.5234	13.4954	13.9252	13.6351	13.6473	13.3852	14.09	13.7549	14.0626	13.9842	13.6993	13.7907	14.1632	13.8039	14.1753	13.7074	13.7609	14.2184	13.7232	13.7844	13.9617	13.5431	13.3261	13.7038	13.5234	13.4653	13.8039	13.6108	13.9363	13.0237	13.9144	13.3594	13.7907	13.224	13.1923	13.3723	13.5178	13.6411	13.2643
IRF1	13.7297	13.554	13.8073	13.5694	13.6635	13.9431	14.1753	14.3333	13.2622	13.3982	13.5319	14.4404	13.2763	14.0281	13.8005	13.7974	13.4338	14.0856	13.9431	13.447	14.0396	13.1735	13.657	13.5824	13.8496	12.9714	14.0937	13.5939	13.4391	13.2883	13.0339	13.0821	13.5516	13.9617	13.9034	13.893	13.1563	12.9208	12.8233	13.2052	13.5431	13.1946	14.0321	14.3947	14.8132	13.9503	13.6943	13.0761	13.9733
GHITM	13.6758	13.5373	13.6326	13.5206	13.691	13.4418	13.3446	13.3074	13.2508	13.4391	13.1351	13.5345	13.7479	13.3953	13.3122	13.2622	13.3319	13.0693	13.3446	13.3699	13.2463	13.3248	13.1563	12.9652	13.224	13.4391	13.1138	13.2714	13.4495	13.4731	13.3594	13.4572	13.5751	13.5402	13.5431	13.5458	13.3982	13.657	13.6167	13.5009	13.5968	13.657	13.4323	13.5036	13.4653	13.6138	13.5009	13.5263	13.7844
LOC730534	13.5119	13.6758	13.7609	13.6602	13.447	13.7609	13.5626	13.8676	13.5458	13.821	13.7353	13.4104	13.4789	13.698	13.6081	13.3172	13.4572	13.4308	13.4679	13.6326	13.224	13.3852	13.4981	13.6669	13.4231	14.0813	13.8392	13.5794	13.549	13.67	13.9076	13.1763	13.2145	13.6266	13.7139	13.5431	13.1585	13.7974	13.5968	13.4731	13.7875	13.5009	13.3473	13.3546	13.5794	13.6503	13.5794	13.4257	13.6326
EIF2AK1	13.167	13.4104	13.2463	13.6138	13.2214	13.3723	13.2145	13.3319	13.1539	13.3594	13.3522	13.0175	13.2789	13.1832	13.3522	13.4817	13.1118	13.3522	13.549	13.2268	13.1629	12.9411	13.0521	12.8544	13.1098	13.2029	13.0317	13.0439	13.281	13.1138	12.6686	13.1457	13.2664	13.3446	13.322	13.1563	12.9392	13.3522	13.5132	13.4544	13.3273	13.5119	13.1901	13.4762	14.5456	13.5292	13.4153	13.549	13.1763
CENTA1	13.2214	13.2554	13.2622	13.4628	13.5824	13.7105	13.3622	13.5119	13.1786	13.1725	13.7609	13.7266	13.493	13.241	13.5373	13.6326	13.2192	13.4034	13.1735	13.3194	13.6021	13.2622	13.5913	13.3747	12.9949	13.201	13.3546	13.418	13.241	13.4128	13.3122	13.6758	13.3901	13.6602	14.0588	13.5345	12.9262	13.5009	13.4679	13.2097	12.987	13.3876	13.5737	13.9328	13.6235	13.6849	13.7038	13.4059	14.1671
YWHAH	13.1629	12.7062	12.4492	13.4128	12.8425	12.7667	12.5522	13.1247	13.1606	12.9044	13.0439	13.4519	13.167	12.5707	13.0479	12.8355	12.5918	13.2314	12.6287	12.5857	12.1052	12.7505	12.5752	12.0865	12.4354	13.0907	12.1356	12.3954	12.914	13.0718	12.9102	13.2976	13.4391	12.8233	13.3648	13.1595	13.4308	13.4418	13.1808	13.9994	13.3147	13.6326	13.0065	13.8965	13.9328	13.3622	13.6351	13.5402	13.4789
UBE2D3	13.549	13.7444	13.5009	13.3346	13.093	13.9034	13.9503	13.8529	14.0775	13.7809	13.5968	13.8005	13.8316	13.9399	14.0856	13.8965	14.024	13.9363	14.055	13.9956	13.9292	14.113	13.9034	13.9328	14.024	14.117	14.0472	13.9956	13.7328	13.8285	14.0973	13.3446	13.5345	13.3771	13.5939	13.9581	13.7479	13.7006	13.2577	13.1606	13.5626	13.4731	13.5851	13.3648	14.1544	13.1371	13.2976	12.8579	13.2664
ADD1	13.8248	13.8713	13.6167	13.6758	13.5968	13.6202	13.5824	13.8316	13.4495	13.5794	13.5036	13.2384	13.8461	13.0739	13.5571	13.1946	13.3522	13.3801	13.1946	13.3622	13.2664	13.4519	13.3297	13.3852	13.3147	13.4731	13.46	13.4205	13.418	13.3319	12.9908	13.4257	13.7139	13.6849	13.7074	13.447	13.241	13.8529	13.4418	13.4445	13.7038	13.1629	13.4205	13.2508	13.4418	13.5373	13.2214	13.3852	13.6266
STK24	13.3546	13.6202	13.4308	13.4679	13.4059	13.3771	13.2689	13.67	13.4153	13.3723	13.6411	13.4308	13.7232	13.2883	13.4495	13.3622	13.4391	13.4128	13.4082	13.493	13.3901	13.4902	13.4495	13.3876	13.3827	13.7412	13.4519	12.9969	13.3572	13.4775	13.224	13.418	13.5913	13.4873	13.67	13.5178	13.554	13.5516	13.5263	13.5737	13.5009	13.7266	13.4845	13.493	13.418	13.3827	13.3419	13.4954	13.4257
NOSIP	13.8357	13.771	14.5915	13.9543	14.0472	13.4981	13.7643	13.5851	13.6167	14.2569	14.1544	13.6602	14.0736	13.6266	13.3699	12.9992	13.7643	13.322	13.3982	13.5709	13.3473	13.6473	13.5064	13.9956	13.691	13.72	13.2181	13.9184	13.6235	13.1923	13.9252	13.5178	13.893	13.6669	13.1649	13.1832	13.7942	13.3648	14.3724	12.8653	14.0201	12.8725	13.5091	13.3273	13.3622	13.814	13.9617	14.0775	13.0651
GNB1	13.6167	13.657	13.3446	13.5091	13.418	13.6635	13.5119	13.6818	13.568	13.4873	13.5571	13.4391	13.2599	13.3723	13.5292	13.6758	13.5516	13.549	13.4628	13.46	13.5036	13.093	13.5146	13.1199	13.3367	12.9527	13.554	13.5458	13.447	13.1901	13.2484	13.717	13.5993	13.4845	13.4205	13.588	13.3194	13.7609	13.4034	13.4954	13.5263	13.3473	13.6138	13.2052	13.3248	13.3801	13.281	13.3967	13.72
LOC645018	14.0506	13.6503	14.3376	13.9581	13.7676	14.1632	14.196	14.07	13.7581	13.9543	14.196	13.46	13.6849	13.6108	13.4954	13.3395	13.5851	13.241	13.6849	13.8713	13.9399	13.9363	13.7297	13.5913	13.8285	14.0588	13.4887	13.7777	13.4902	13.7297	13.8496	14.0472	13.9804	13.8897	14.1014	13.0651	13.1901	13.4845	14.3905	12.4149	13.9076	13.8105	13.8755	13.821	13.3747	14.1219	13.864	13.9184	13.738
ATP5O	13.6051	13.8174	13.7479	13.5458	13.2508	13.3346	13.1923	13.4366	13.6381	13.7907	13.4628	13.5968	13.5766	13.673	13.6758	13.3446	13.6051	13.568	13.578	13.6266	13.5373	13.7643	13.322	13.3419	13.7105	13.9956	13.3473	13.7942	13.673	13.9328	13.7844	13.2097	13.7676	13.3497	13.6473	13.6266	13.6266	13.8005	13.72	13.3395	13.8105	13.8791	13.3929	13.7328	13.061	13.5968	13.3319	13.3699	13.8005
HIGD2A	13.3097	13.4628	13.7809	13.8005	13.9468	13.7074	13.8461	13.5146	13.5064	13.6444	13.8529	13.5939	13.1986	13.5939	13.6021	13.7676	13.3122	13.2192	13.5866	13.5652	13.6943	13.2883	13.9328	13.4544	13.6943	13.2214	13.1351	13.7232	13.4231	13.6881	13.6758	13.7777	13.4153	13.7844	13.4731	13.5516	13.3771	13.236	13.738	13.1629	12.9714	13.3319	13.7074	13.0032	13.4295	13.7609	13.5824	13.5737	13.6669
FAM39E	13.4445	13.6051	13.6351	13.6635	13.5178	13.7549	13.5913	13.6849	13.4704	13.4338	13.9076	13.1563	13.4166	13.598	13.5913	13.5064	13.7266	13.1563	13.673	13.7297	13.8392	13.7942	13.8285	13.8791	13.549	13.5373	13.9804	13.8316	13.5146	13.8248	13.6138	13.2883	12.867	13.5851	13.3594	13.3319	12.3728	13.3594	13.4628	13.3194	13.5305	13.3801	13.6473	13.3473	13.2554	13.4445	13.3929	13.4572	13.2463
ATP5H	13.6326	13.5402	13.4205	13.6081	13.3901	13.5263	13.3002	13.3594	13.5319	13.4954	13.4308	13.7809	13.5824	13.4981	13.4141	13.447	13.4544	13.5766	13.568	13.6081	13.427	13.4379	13.5119	13.1128	13.5851	13.6785	13.253	13.6167	13.5373	13.4628	13.8357	13.5737	13.717	13.3122	13.4418	13.5794	13.9328	13.7353	13.6849	13.5119	13.5652	13.8755	13.3747	13.5709	12.9392	13.3473	13.3827	13.4902	13.7328
NOLA3	13.0055	13.0363	13.1854	13.6881	13.1786	13.0821	12.9652	12.4149	13.3901	13.4544	13.911	13.6081	13.0545	13.2664	13.2883	13.4128	13.5652	13.5851	12.987	12.9579	13.5709	13.1118	13.0545	12.3237	13.0298	12.9335	13.0739	12.7572	13.0258	12.8304	13.5652	13.4308	13.0382	13.5178	13.7266	13.4762	13.3002	13.3622	13.5234	13.6537	12.9447	13.1901	13.1271	13.7139	13.3723	13.4641	13.5516	13.8529	13.673
LOC646531	13.1946	13.3953	13.7297	13.1878	13.0459	13.4104	13.3747	13.4153	13.7907	13.6138	13.6351	13.5737	13.6381	13.6503	13.7412	13.691	13.4954	13.6108	13.7907	13.8423	14.1388	13.5431	13.4572	13.5192	13.7444	13.6202	13.3572	14.1299	13.3759	13.9144	13.9503	13.7328	13.2076	13.1986	13.9431	14.0159	13.9879	13.447	13.6266	13.1563	13.568	13.5345	13.9184	13.4789	12.8708	13.4128	13.1435	13.9804	13.4128
LGALS3	13.3446	13.3319	13.5626	12.9427	13.3622	13.7313	13.6818	13.4445	13.2967	13.0195	13.3723	12.8371	12.8528	13.3002	13.7743	13.7512	13.6108	13.8529	13.0907	13.2339	13.8861	13.4418	13.6051	12.8918	12.967	12.9065	13.4082	13.1199	13.493	13.3572	13.1649	13.9879	13.6021	12.9615	13.1178	13.1457	12.8188	13.3273	13.5431	13.5458	12.9834	13.3028	13.6411	13.2484	14.1219	13.0781	13.7777	13.5373	13.6602
C6orf32	13.4653	13.46	14.07	13.7232	13.6411	13.771	13.6411	13.691	13.5652	13.9	13.5345	13.5319	13.549	13.3319	13.2957	13.2883	13.5263	13.5968	13.2097	13.5993	13.568	13.1967	13.4034	13.3273	13.5993	13.4445	13.2976	13.4731	13.4034	13.4231	13.5292	13.4873	13.3572	13.7643	13.4704	13.3248	13.3367	13.1036	13.7512	13.0075	13.493	13.1457	13.8569	13.4128	13.67	13.2145	13.2789	13.4082	13.2121
ZNF223	13.4981	13.2052	13.5091	13.3122	13.493	13.3522	13.5458	13.4116	13.6036	13.2097	13.3248	13.3097	13.3473	13.6818	13.1923	13.6138	13.7942	13.3028	13.7038	13.2664	13.8825	13.4205	13.8248	14.2227	14.1262	13.2763	13.8713	13.7266	13.9328	13.4282	13.3572	13.7549	13.3147	13.2554	13.0841	13.3674	12.8918	12.7062	13.4519	13.5652	13.2739	13.4445	14.1014	13.2689	13.5824	13.1014	13.0651	13.3876	12.4866
FOSB	13.8605	13.1413	13.2833	14.0074	13.4817	14.4877	14.8269	14.6978	15.1332	14.2145	14.4177	14.8838	14.7956	15.6056	15.3153	15.2357	15.7907	15.1588	15.8386	15.4222	15.3703	15.9906	15.3703	16.0968	15.2088	15.3558	15.9631	15.2651	14.5401	15.1125	15.152	13.9076	14.07	14.5254	14.0662	14.2521	13.201	13.821	11.7337	12.8355	13.911	13.9769	13.7743	14.0736	13.9804	12.6417	12.7855	11.8876	12.4623
MCL1	13.5458	13.5064	13.549	13.4205	13.4495	13.9503	14.3905	13.864	14.2788	13.8039	13.5939	13.8549	13.7038	13.9653	13.771	14.2145	13.8713	13.6235	13.9292	13.9617	13.8248	14.1632	14.2974	14.1464	13.9252	13.3723	14.4647	13.5993	13.5234	13.7659	13.7693	13.6051	13.4859	13.8073	13.4495	13.922	13.6351	13.2314	13.3622	13.2314	13.7139	13.5766	13.6266	13.0095	13.568	12.928	13.0761	12.9694	13.1967
EEF1D	14.0159	13.9184	14.5606	13.9879	14.1053	13.9956	13.9994	13.9879	14.0856	14.3144	13.9363	13.4873	14.2521	14.1835	14.1544	13.6266	14.1921	13.7844	14.0937	14.3144	14.0201	13.9693	14.0281	14.3333	14.1921	13.8316	13.8676	14.4127	13.9252	14.0396	14.117	13.8897	13.8791	14.1921	13.7974	13.8073	13.8529	13.814	14.1709	13.2463	14.1388	13.2484	13.864	13.6051	11.9474	13.7266	13.5234	14.1053	13.2314
PRDX5	13.2739	13.4653	13.1293	13.0995	13.322	13.0363	13.4544	13.2577	13.4231	13.3097	13.4495	13.5146	13.5851	13.2689	13.3147	13.167	13.2484	13.2622	13.0599	13.4873	13.4789	13.3172	13.0032	12.8038	13.0469	13.2437	13.3052	13.4762	13.2789	13.5516	13.5373	13.4704	13.3953	13.2508	13.3876	13.4902	13.4679	13.8676	13.236	13.6296	13.2599	13.418	13.3522	13.3122	13.5571	13.4789	13.6051	13.1878	13.3273
UQCRQ	13.7074	13.568	13.691	13.5119	13.6881	13.6167	13.4257	13.236	13.3297	13.6296	13.5851	13.657	13.3147	13.5292	13.4034	13.1501	13.2291	13.588	13.3901	13.3771	13.5516	13.2643	13.5263	13.0974	13.2976	13.4282	13.322	13.4128	13.4205	13.588	13.493	13.5009	13.493	13.6381	13.554	13.5626	13.5206	13.5206	13.8825	13.5373	13.3929	13.3648	13.6444	13.2846	13.0521	13.7006	13.4845	13.6138	13.7353
ISG20	13.5652	13.1694	13.738	13.6943	13.7974	13.4628	13.4104	13.3248	13.5119	13.588	13.7809	13.4257	13.4231	13.4007	12.9714	13.1098	13.4128	13.0761	13.4128	13.3852	13.1923	13.4572	13.3172	13.1808	13.3194	13.3346	13.0565	13.5402	13.2314	13.6444	13.4059	13.3699	13.2883	13.698	13.3052	13.0136	13.9	13.1098	13.5652	13.1271	13.6669	12.9007	13.7777	13.5913	13.7549	14.0396	13.7353	13.7907	13.0117
BIRC3	13.4257	13.1763	12.989	13.0498	13.3346	13.0216	13.2484	13.5709	13.281	13.0439	12.8251	13.2268	13.5652	13.5652	13.5794	13.7038	13.9879	13.4873	13.6785	13.4495	13.7297	14.0363	13.5939	14.5057	13.9503	13.7444	13.8605	13.568	14.0813	13.4366	13.4007	13.4205	13.5146	13.1014	13.0974	13.1967	13.9769	12.8473	13.0278	13.8461	13.1519	13.9842	13.7297	13.1435	12.8371	13.0032	12.6054	13.3172	12.1943
LOC642817	13.5939	13.9842	13.9144	13.7844	13.3367	13.2554	13.3052	13.7479	13.8496	14.196	13.2833	13.5794	13.9	13.9076	13.6444	13.5146	13.738	13.6081	13.8005	14.07	13.4762	13.738	13.698	13.4731	13.72	14.1388	13.8496	14.1587	13.738	13.8174	14.3107	12.9226	13.5968	13.4762	13.6235	13.7974	13.2739	13.8965	13.7942	13.4418	14.0321	13.4034	13.1946	13.554	13.6503	13.67	13.6266	13.6167	13.8105
CCDC109B	13.5913	13.7549	13.9503	13.6785	13.6051	13.46	13.821	13.8039	13.7006	13.7581	13.6881	13.6473	13.6473	13.3147	13.7777	13.2384	13.9252	13.9581	13.5824	13.6108	13.5091	13.8529	13.5968	13.5528	13.673	14.1299	13.72	13.7643	13.717	13.5766	13.6108	13.5766	13.9915	13.3953	13.3801	13.4104	13.6473	13.7844	13.6108	13.2957	13.5305	13.5064	13.6635	13.3572	13.0718	13.5824	13.5345	13.7479	13.4059
MAL	14.0813	13.6635	14.5999	14.0813	13.673	13.7875	14.1464	14.1053	13.9076	14.235	13.9653	13.3747	14.1088	13.5766	13.7643	13.3028	14.0429	13.5993	13.554	13.7844	13.6381	13.6818	13.7609	13.738	14.2184	13.7512	13.3622	14.0396	13.9184	13.7266	13.6635	14.026	14.0036	13.738	12.897	13.1225	13.0821	13.4308	14.2053	12.7032	14.1299	13.2052	13.9653	12.7391	13.6167	13.6167	13.4981	13.7139	12.488
CYFIP2	13.9399	13.9693	14.0429	14.07	14.0662	13.7444	13.9693	13.911	14.024	14.0472	13.5737	13.2508	13.673	13.7643	13.6235	13.4257	13.3674	13.4495	13.3699	13.6167	13.2859	13.2384	13.6758	13.9184	13.771	13.5119	13.9328	13.6503	13.6635	13.2339	13.2976	13.3674	13.7743	13.9915	13.4789	13.6503	12.7505	13.5458	13.7444	13.1098	14.0281	13.0155	13.5458	13.1808	13.2909	13.6602	13.2554	13.4391	13.2508
MATR3	13.7809	13.6411	13.6411	13.6021	13.4338	13.673	13.6669	13.7074	13.5571	13.8285	12.7617	12.8953	13.4059	13.4718	13.7676	13.4308	13.6296	13.6202	13.3876	13.5824	13.3723	13.6296	13.3827	13.7743	13.4981	13.698	13.8825	13.4153	13.691	13.3699	13.3497	13.201	13.8285	13.5597	13.4981	13.5737	13.0075	13.7074	13.5939	13.1394	13.7942	13.4391	13.3546	13.4153	13.3074	13.4873	13.3446	13.5626	13.4873
IL8	13.1479	12.867	12.3313	12.4137	13.1501	14.6679	15.2539	14.5157	14.7034	14.1088	14.6073	14.6073	14.8132	15.1871	15.4153	14.6124	14.9371	14.3859	14.8384	15.2436	14.8838	15.4222	15.6772	14.2875	14.3144	15.1064	14.7123	14.6457	14.9125	14.6405	14.8697	15.5833	15.2088	14.1709	13.3122	14.07	13.0974	13.2976	10.4208	12.9615	13.6818	14.988	12.1787	15.4834	15.5833	12.0625	12.6364	11.0707	13.1519
GNAI2	13.224	13.3122	13.67	13.3002	13.5766	13.4082	13.3982	12.9992	13.3172	13.3172	13.6266	13.351	13.1854	13.1923	12.9468	13.3594	13.236	13.2859	13.2859	13.1312	13.6849	13.0175	13.3876	13.0718	13.0693	12.8758	12.8988	13.322	13.1225	13.3248	13.1014	13.6444	13.0718	13.5939	13.5824	13.5597	13.9468	13.5824	13.5516	13.4873	13.0821	13.3929	13.6849	13.2622	13.6202	13.4679	13.7643	13.493	13.4082
CLCN7	13.4007	13.4153	13.4034	13.5036	13.717	13.4572	13.3028	13.717	13.3052	13.3028	13.6296	13.4704	13.4628	13.1138	13.2268	13.1332	13.4366	13.4104	13.1138	13.1946	12.9852	13.201	13.2192	13.6943	13.3346	12.9969	13.4391	13.3346	13.1199	13.2622	13.0421	13.4034	13.3594	13.5626	13.5263	13.4257	12.928	13.5402	13.3367	13.6758	13.4338	13.0136	13.4762	13.6602	13.0012	13.5234	13.2169	13.3074	13.3953
CEP27	13.4704	13.3273	13.5119	13.2833	13.4653	13.1293	13.4789	13.3122	13.3771	13.2934	13.3648	13.2622	13.224	13.5036	13.1371	13.5036	13.5036	13.3699	13.4366	13.1539	13.4628	13.1057	13.9076	14.0569	13.8039	13.1351	13.7875	13.7444	13.7942	13.4205	12.9289	13.7743	13.1371	13.2957	13.2909	13.3122	12.6703	12.5817	13.3876	13.6235	13.1843	13.2214	14.0363	13.1775	13.3771	13.2664	13.2192	13.418	12.3611
RPL7	14.1425	13.8005	13.9543	13.7809	13.5652	13.814	13.6444	14.0159	13.6602	14.0626	13.4981	12.9392	13.1901	13.6444	13.8174	13.6235	13.864	13.67	13.5458	13.7676	13.6138	13.5639	13.72	13.7844	13.8676	13.3982	13.864	13.7581	13.8605	13.1271	13.3319	13.588	14.1388	13.7105	13.236	13.3929	12.9411	13.8039	14.0363	13.2339	14.113	13.549	13.3723	12.9298	13.2157	13.5444	13.3172	13.5851	13.4544
CD79B	13.4366	12.7651	13.6138	13.8791	13.5993	13.0693	12.967	13.7105	13.7139	13.1178	13.0545	13.2339	13.5402	12.8698	12.8251	13.0339	13.3052	13.0032	12.4149	13.4628	13.0498	12.3728	13.3028	13.1479	13.4153	13.3395	12.5049	12.7803	13.2121	13.493	13.3002	13.3194	13.4519	14.0396	13.5968	13.0459	12.5049	13.6366	14.2007	13.6849	14.1671	13.3419	14.0159	13.5292	13.0317	15.092	13.3982	13.9581	12.867
PSCD1	13.5737	13.4495	13.8039	13.6108	13.554	13.5373	13.3929	13.5652	13.3546	13.6943	13.6202	13.5851	14.0363	13.3248	13.236	13.4205	13.4762	13.0521	13.5036	13.3122	13.3852	13.9328	13.554	13.9144	13.6758	13.9804	13.9653	13.7006	13.3147	13.6021	13.5431	13.2463	13.5431	13.6021	13.6381	13.2121	13.9915	13.2508	13.6444	13.2714	13.673	13.3497	13.5652	13.5737	13.2689	13.3194	13.0693	13.5709	13.3395
SEC61G	13.5064	13.5913	13.5993	13.5292	13.4445	13.738	13.7942	13.3747	13.3953	13.7297	13.4817	13.7444	13.4572	13.7479	13.5993	13.5373	13.5597	13.7875	13.4731	13.6818	13.8496	13.771	13.5373	13.3122	13.6473	13.5597	13.2957	13.5009	13.3982	14.1219	13.6296	12.9119	13.5652	13.3876	13.3346	13.4981	13.5178	13.3446	13.6635	13.1808	13.5571	13.201	13.6758	13.0237	12.6798	13.1312	12.8596	13.3497	13.4845
TRAM1	13.6503	13.5263	13.151	13.3319	13.1923	13.5292	13.2622	13.3953	13.4282	13.5146	12.6832	13.2909	13.7444	13.3648	13.554	13.5178	13.3852	13.5373	13.4231	13.4762	13.2554	13.8005	13.0761	13.2751	13.3594	13.7105	13.3929	13.3319	13.4059	13.5851	13.5626	13.1878	13.6473	13.253	13.3622	13.4082	13.4082	13.67	13.4308	13.5292	13.5794	13.7942	13.167	13.8039	13.1539	13.2554	13.1158	13.3052	13.3801
C3orf34	13.5345	13.3747	13.1694	13.0012	13.3522	13.1714	13.3172	13.4704	13.5292	12.9262	13.2214	13.1332	13.1808	13.7609	13.7974	13.717	13.9994	13.4731	13.5913	13.3395	13.6202	13.7074	13.6381	14.6405	14.0036	13.3622	13.3028	13.5234	14.0321	13.2859	13.281	13.6411	13.8423	13.1967	13.1606	13.322	14.6179	12.8092	12.8776	13.7353	13.2664	14.2698	13.8461	12.9262	12.5679	12.844	12.2206	13.0781	11.9706
DDX17	13.7743	13.3876	13.201	13.2957	13.1606	12.8002	12.9606	13.3002	13.3723	13.2789	12.9634	13.2599	13.5146	12.967	13.093	13.0555	13.5993	12.8092	12.9065	13.0907	13.1199	13.4379	12.8839	13.5373	13.8357	13.4873	13.4887	13.2833	13.3546	13.0439	13.3346	13.1967	13.7232	13.093	13.224	13.2303	13.3546	13.2859	13.2554	13.8285	13.6444	14.1835	13.2052	13.3052	12.8868	13.201	13.1351	13.6108	13.1986
LAPTM5	13.3723	13.4845	13.5766	13.3723	13.4873	13.4902	13.2909	13.5064	13.717	13.4082	13.7777	13.5009	13.5091	13.7974	13.4731	13.6296	13.3074	13.2789	13.3827	13.3497	13.5626	13.7006	13.5458	14.0074	13.5737	13.1735	13.5709	13.3522	13.6351	13.7549	13.4128	13.3723	13.3827	13.4954	13.6503	13.5263	13.46	13.7185	13.814	13.4128	13.4981	13.7777	13.3572	13.1986	13.4679	13.549	13.588	13.1394	13.3522
PPP2CA	13.3771	13.4544	13.2097	13.1901	13.2714	13.9617	13.6202	13.7006	13.7444	13.5431	13.0799	13.673	13.691	13.7844	13.9	13.67	13.6758	13.6993	13.8496	13.7328	13.7074	13.7777	13.7581	13.8105	13.8529	14.0506	13.7266	13.4308	13.3319	13.698	13.5263	13.46	13.4789	13.1786	13.3172	13.3346	13.1629	13.3901	13.1901	13.6202	13.4104	13.6235	13.3876	13.5516	13.5009	13.3953	13.3522	13.3771	13.7549
ATP6V1G1	13.7006	13.7875	13.7844	13.5373	13.4007	13.6326	13.5206	13.7974	13.4572	13.67	13.5263	13.201	13.4902	13.4817	13.6266	13.4845	13.5824	13.6473	13.4544	13.6235	13.8423	13.2957	13.5571	13.346	13.5263	13.5838	13.3522	13.6235	13.5766	13.3052	13.4731	13.4789	13.6785	13.4128	13.3674	13.4205	13.3147	13.4282	13.7412	13.3297	13.7777	13.4104	13.7105	13.3497	13.4082	13.4817	13.4205	13.5292	13.5824
ZFAND5	13.3827	13.4338	12.5263	12.9505	12.6635	13.1539	12.8653	13.4282	13.3419	13.1457	12.56	13.2314	13.4954	13.2484	13.1014	13.2268	13.4704	12.9007	13.447	13.0865	13.2214	13.5766	13.447	13.2384	13.3074	13.4653	13.2934	13.2145	13.3097	13.6849	13.6081	13.2554	13.3648	12.8288	13.1371	13.4282	13.5119	13.6021	12.7272	14.0429	13.2437	14.1343	12.7718	13.5234	12.4023	12.993	13.1138	13.0739	13.5597
RASSF2	13.3497	13.5178	13.0521	13.1332	13.1832	12.989	12.7684	13.0459	13.0439	13.1413	12.9714	13.4034	13.3622	12.7505	13.1901	12.7765	13.1047	12.9316	12.7855	12.8204	12.8988	12.9734	13.0136	13.0216	12.7718	12.9543	13.1714	12.6214	13.2437	13.1878	12.867	13.4418	13.4902	13.4544	13.5064	13.5036	13.5146	13.7512	13.2789	13.9	13.3074	13.5571	13.1967	13.4282	13.6296	13.241	13.6326	13.4628	13.4653
UQCRFS1	13.4544	13.5993	13.717	13.5652	13.6138	13.9879	13.9915	13.8791	13.6503	13.8357	13.5709	13.7777	13.6326	13.5851	13.673	13.5851	13.3929	13.738	13.7074	13.6051	13.7328	13.46	13.7479	13.3699	13.5953	13.8605	13.6202	13.6635	13.3522	13.6473	13.8005	13.4366	13.2776	13.6537	13.7844	13.5968	13.6296	13.3699	13.4981	13.1967	13.4034	13.2097	13.5373	13.1501	13.2463	13.3319	13.241	13.1036	13.3747
PRCP	13.5373	13.6081	13.1371	13.3419	13.4789	13.3594	13.281	13.2859	13.3319	13.2622	13.0401	13.493	13.4495	12.8776	13.4231	13.2291	13.2883	13.201	12.7357	13.2169	13.1158	13.0498	13.1435	12.4466	13.0055	12.8288	13.1946	12.7032	13.3446	13.2599	13.1036	13.673	13.7105	13.4007	13.4954	13.5234	13.3747	13.8073	13.5458	13.8569	13.4572	13.7328	13.1878	13.3594	13.3097	13.3097	13.5913	13.0545	13.5939
LIME1	13.46	13.1629	13.893	13.911	14.2227	13.7777	14.0662	13.9363	13.5824	13.9468	14.1343	13.1808	13.0651	13.8461	13.6296	13.281	13.2664	13.6537	13.67	13.72	13.5824	13.1271	13.7942	13.4762	13.717	13.6411	13.6266	13.9328	13.3473	13.4445	13.3546	13.5064	13.5851	14.3571	13.4544	12.7241	13.1749	13.2702	13.5913	12.4008	13.8357	12.7749	13.8392	13.2076	13.3297	14.024	13.814	14.4738	13.6081
GBP2	13.4873	13.3028	13.0889	13.2739	13.3446	12.9579	13.3194	13.1371	12.9411	12.9579	12.9262	13.4731	12.9035	12.9065	12.9065	13.3367	13.5319	14.09	13.2214	13.0781	13.0117	12.5476	12.7357	12.7196	13.2883	12.8473	13.4731	12.782	12.9026	12.8021	12.9527	13.3074	13.1293	13.1832	12.6588	13.2763	13.3497	12.9949	13.2145	13.4308	13.0781	12.8579	13.5178	14.0813	13.5146	13.8105	13.4679	13.6473	13.5737
C15orf15	13.67	13.6669	13.8825	13.7777	13.4762	14.2099	13.9769	13.893	13.8461	13.864	13.3273	13.3852	13.814	13.9292	14.0588	13.6381	13.8039	13.8073	13.8423	13.9769	13.7844	14.0662	13.8496	13.7942	13.922	13.799	13.7844	13.657	13.7643	13.738	13.6266	13.2677	13.3876	13.4308	13.4628	13.6108	13.0907	13.4366	13.7809	12.9543	13.6943	13.3395	13.67	13.2097	13.346	13.5666	13.2643	13.3147	13.3674
SLC44A2	13.7266	13.493	13.5234	13.7297	13.5913	13.3982	13.2076	13.6138	13.3747	13.5292	13.72	13.0995	13.5009	13.3122	13.3648	13.1293	13.3546	13.3723	13.2714	13.322	12.8579	12.9752	13.1808	13.2934	13.3002	13.0136	13.3446	13.1878	13.201	12.9752	13.2145	13.0588	13.5206	13.6635	13.2291	13.3852	12.9242	13.7328	13.1332	13.4902	13.4495	13.0995	13.4007	13.3319	13.6266	13.6094	13.3801	13.2384	13.6381
PSMB3	13.2484	13.322	13.3172	13.4653	13.5091	13.5345	13.3395	13.3473	13.322	13.1606	13.4873	13.7875	13.2339	13.2833	13.1649	13.4282	13.1332	13.5119	13.0865	13.3097	13.3395	13.0479	13.3699	12.9298	13.0918	13.4679	13.2463	13.1479	13.0278	13.253	13.3982	13.4153	13.2957	13.5345	13.6758	13.3622	13.4873	13.1079	13.4338	13.4338	13.1128	13.2463	13.4257	13.7266	13.2599	13.8357	13.6202	13.2192	13.9399
ARL5A	13.5709	13.3674	13.2714	13.224	13.3002	13.0952	13.2097	13.4762	13.3273	13.4205	12.7114	13.2643	13.1967	13.3786	13.4205	13.1808	13.3446	13.3594	13.1786	13.3172	13.3572	13.6351	13.2957	13.4679	13.3546	13.2957	13.4845	13.3147	13.7777	13.4007	13.2554	13.3172	13.5119	13.447	13.4391	13.4954	13.2508	13.5036	13.5091	13.67	13.6326	13.1986	13.4231	13.1967	13.2437	13.5626	13.5597	13.2976	13.4445
TINP1	13.554	13.5626	13.7907	13.5939	13.6167	13.4679	13.3356	13.568	13.8174	13.7974	13.1118	13.4007	13.7328	13.6473	13.5036	13.6081	13.5737	13.6051	13.4257	13.5851	13.3346	13.4731	13.4104	13.8713	13.5597	13.9363	13.5851	13.6202	13.9653	13.893	13.8285	13.1158	13.4308	13.7074	13.2689	13.3901	13.5516	13.3953	13.8569	12.9694	13.7809	13.6818	13.2169	13.5431	13.4128	13.9693	13.3622	13.3367	13.6021
RGS10	13.0075	13.1606	13.5178	13.5694	13.2121	13.2169	13.4128	13.1649	13.1199	13.4902	13.3183	12.6988	12.7488	13.2169	13.3594	13.4731	13.1519	13.5146	13.4572	13.5009	13.0237	12.5506	13.3367	12.7017	13.0555	12.8562	12.7357	13.2214	12.8902	12.5278	12.8219	13.0889	13.0055	13.3901	12.9694	13.2192	13.0693	13.3122	13.6602	13.3583	13.3002	13.0588	13.1158	13.4981	13.8285	13.3699	13.4789	13.8825	12.9208
EHD1	13.3699	13.0216	13.2934	13.549	13.8248	12.9598	13.3648	13.3052	13.0588	13.418	13.6537	13.0136	13.3594	13.0498	13.2622	13.1606	12.9579	13.3122	13.3319	13.1923	13.0831	13.1808	13.3074	12.9392	12.7163	13.3929	13.3419	13.0351	13.1098	12.8491	12.7032	13.493	13.4418	13.5824	13.4845	13.1735	12.6072	13.4628	13.4704	13.4205	13.3827	12.7684	13.5913	13.6138	13.4544	13.5178	13.4257	13.911	13.5626
C13orf27	13.8005	13.5146	13.9076	13.5319	13.5319	13.6473	13.5597	13.3982	13.7777	13.6669	13.7139	12.989	13.0117	13.5897	13.568	13.3827	13.4104	13.5345	13.717	13.6669	13.6503	13.2097	13.6411	13.7512	13.9915	13.1293	13.4366	13.7139	13.5345	13.3172	13.0401	13.3814	13.4366	13.657	13.061	13.4628	12.9298	13.2957	13.9879	13.0421	13.4128	12.8204	13.7659	12.7651	13.4762	13.588	13.4418	13.7297	13.3248
ADAR	13.6881	13.2934	13.0865	13.4104	13.5036	13.1158	13.2169	13.1036	13.3648	13.167	13.3473	13.2883	13.1539	12.9615	12.9949	13.1312	13.1158	13.0565	12.6784	12.7784	12.9354	13.0459	12.9652	13.3319	13.1649	13.0865	13.2339	12.9579	13.1178	12.8935	13.0889	13.3522	13.4282	13.3572	13.0952	13.3172	13.1057	13.4104	13.3419	13.5516	13.3747	13.067	13.4572	13.3248	13.346	13.418	13.3497	13.4153	13.4418
HMGN2	13.72	13.7006	13.5652	13.5766	13.3929	13.4873	13.7875	13.7609	13.7479	13.7444	13.4519	13.0739	13.2957	13.4954	13.4104	13.3929	13.6326	13.4519	13.5737	13.6744	13.1563	13.0651	13.2833	13.5292	13.6021	13.4153	13.738	13.4789	13.554	13.5146	13.2833	13.2121	13.5036	13.5009	13.0195	13.3771	12.5233	13.6744	13.6202	13.5091	13.7328	12.967	13.2976	13.0373	13.3648	13.5851	13.4282	13.1694	13.7297
RPS26	14.0429	14.7092	13.9769	13.4731	14.2429	13.893	14.3674	14.1791	12.1908	12.2525	14.3622	12.1846	13.9184	13.9617	14.0281	14.2429	14.5006	14.1388	13.8897	12.2352	13.7581	14.5057	14.0626	13.8897	12.2391	12.2785	13.4338	14.8007	14.5606	14.3905	13.9956	11.9191	14.2698	13.5913	14.0626	13.6881	12.4609	14.5658	14.3859	11.7272	14.0429	14.0396	13.8005	14.347	14.3859	12.1167	14.4549	14.3062	12.335
TAGLN2	12.7081	12.7888	12.882	13.1036	12.5461	12.8339	12.4792	12.8046	13.5091	13.4366	13.6943	12.9615	12.9834	13.3622	13.5737	13.5626	13.1563	13.4704	13.4034	13.5178	12.8634	13.0382	12.8073	13.2214	12.9527	12.8304	12.8101	13.4282	12.8935	13.2976	13.3723	12.8953	12.8002	12.7986	13.2622	13.4817	13.9653	13.5105	12.9505	13.3747	13.1901	13.2268	12.5121	13.2437	14.1632	13.1158	13.4338	13.4704	12.9561
H2AFZ	13.322	13.5036	12.8953	13.2789	13.236	13.322	13.1394	13.3522	13.3367	13.1986	13.2121	13.5431	13.3852	13.1501	13.1946	13.3801	13.1259	13.4679	13.2314	13.2463	12.9969	13.1763	12.9543	12.9175	13.2508	14.0856	13.1271	13.0521	13.1457	13.3147	13.46	13.3367	13.5597	13.1435	13.3546	13.2934	13.5402	13.5064	13.3982	13.7412	13.1946	13.6108	13.2314	13.5319	13.2643	13.3248	13.418	13.2076	13.7038
SRP14	13.3194	13.3827	13.4445	13.3097	13.3028	13.3248	13.4495	13.2076	13.5794	13.7609	13.4845	13.6326	13.6669	13.8496	13.4845	13.5009	13.4153	13.5516	13.5571	13.5913	13.2622	13.2976	13.4128	13.5234	13.6051	13.4082	13.3097	13.7105	13.4257	13.5036	13.814	13.4231	13.253	13.5737	13.4873	13.7074	13.4282	13.493	13.3497	13.2145	13.4954	13.3953	13.4628	13.6849	13.2384	13.5794	13.2859	13.5119	13.821
LOC649143	13.3982	13.9328	12.5134	12.5722	14.1753	13.2029	12.6493	13.418	13.738	12.6182	12.599	13.5571	13.8496	12.9834	13.2339	13.1457	12.6938	14.9071	11.8441	12.6849	13.7942	14.4269	13.6296	12.4609	13.6381	13.6881	13.9144	13.7479	12.4073	13.8825	13.3194	13.1138	12.6946	13.1271	12.8868	13.7038	13.3172	13.9842	11.9858	14.5352	13.322	14.4358	14.4221	15.2019	13.4059	14.3144	13.911	12.6556	15.0726
ALDOA	12.6885	13.0781	12.9734	13.0055	12.8457	12.5766	12.6478	12.8304	13.3982	13.2314	13.3052	13.6235	13.3827	13.1854	13.0781	13.0821	13.0117	13.1585	13.0545	13.1282	13.2192	12.9411	12.8304	11.9191	12.9793	13.0479	12.7872	13.554	13.1036	13.5345	13.8605	13.0175	12.814	12.9226	13.4308	13.7266	13.5913	13.2339	12.6118	13.4391	12.747	13.1014	13.1986	13.5091	13.4257	13.3497	13.72	13.2934	13.6849
GSTK1	13.4789	13.4231	13.2577	13.4845	13.3172	13.5766	13.224	13.4519	13.5146	13.6202	13.5913	13.4059	13.4338	13.493	13.4141	13.4495	13.4308	13.5709	13.3648	13.588	13.241	13.3122	13.5178	13.0907	13.5146	13.3097	13.5206	13.5709	13.3953	13.322	13.6881	13.3648	13.4628	13.4034	13.2859	13.6326	13.4981	13.3546	13.3572	13.2883	13.3801	13.5206	13.4059	13.3297	12.8312	13.493	13.1371	13.3648	13.0781
LOC644863	13.3297	13.4082	13.4614	13.2314	13.4679	13.3052	13.1351	13.0075	13.4205	13.4789	13.2554	13.6669	13.9994	13.6635	13.4544	13.3086	13.201	13.3074	13.3953	13.6444	13.4007	13.4845	13.2577	13.5192	13.5709	13.9	13.2268	13.7038	13.568	13.7809	13.8073	13.1808	13.0459	13.3747	13.6138	13.6758	13.5824	13.3346	13.3122	13.2976	13.5458	13.7105	13.447	13.72	13.3497	13.4519	13.2339	13.6785	13.814
NFKBIZ	13.6381	13.3052	13.0781	13.1435	13.2484	13.0155	13.7444	13.7297	13.4789	13.3446	12.9316	14.0074	14.1544	13.1098	13.2052	13.8073	13.673	13.6943	13.6167	13.3419	13.5234	14.0506	13.9915	13.6473	13.5626	13.9431	13.5036	13.6444	13.5292	13.3622	13.7412	14.4043	14.1632	13.2145	13.2976	13.5119	13.4817	13.1585	13.1057	13.2599	13.3648	13.7549	13.588	14.09	13.3028	13.0363	12.7324	12.8101	12.7374
EDF1	13.4308	13.6326	13.814	13.3522	13.4902	13.3699	13.2029	13.2157	13.447	13.72	13.67	13.4128	13.6167	13.5319	13.4704	13.2599	13.568	13.554	13.6138	13.7609	13.4231	13.6167	13.2473	13.3367	13.5794	13.5571	13.0117	13.717	13.4418	13.3122	13.7297	13.4391	13.7412	13.3367	13.5516	13.5402	13.7412	13.4653	13.8948	13.1247	13.7412	13.5431	13.3699	13.3622	13.1036	13.6444	13.5939	13.4679	13.3194
HSPC152	13.5516	13.3699	13.5146	13.6381	13.6235	13.2957	13.2268	12.9969	13.2859	13.5652	13.5993	13.4418	13.4034	13.2599	13.1763	13.1371	13.224	13.3827	13.5146	13.1108	13.3273	12.9262	13.1199	13.0298	13.1225	13.3052	13.0439	13.0351	12.9579	13.3419	13.447	13.4282	13.1606	13.3248	13.2554	13.093	13.2268	13.418	13.5402	13.1649	13.5851	13.093	13.4128	13.2909	13.0995	13.8248	13.8005	13.7777	13.7074
ATP5J2	13.4418	13.4034	13.2508	13.2169	13.3497	13.0841	13.2192	12.9175	13.3852	13.2339	13.4059	13.2689	13.1786	13.0841	13.1629	13.3546	13.1694	13.1629	12.9949	13.0298	13.1878	12.8653	12.192	12.867	13.0439	13.167	12.8355	12.8473	13.1413	13.1763	13.2076	13.5119	13.5824	13.1878	13.1457	13.4366	13.2145	13.4034	13.2437	13.5263	13.1563	13.4308	12.8988	13.3747	13.3419	13.6381	13.6758	13.4104	13.7743
FLJ21438	13.4231	13.4762	13.8392	13.7353	13.9144	13.3147	13.4445	13.5766	13.253	13.568	13.7875	13.2577	13.6051	13.3194	13.1118	13.0889	13.0545	13.2599	13.1606	13.1967	13.1649	13.2554	13.1501	13.3147	13.2599	13.3122	13.1854	13.4059	13.2169	12.989	12.9682	13.2484	13.4059	14.0775	13.447	13.067	12.6686	13.4902	13.6744	13.0298	13.4762	13.0841	13.7006	13.4873	13.1519	13.6635	13.5458	13.7676	13.5851
HNRPM	13.3028	13.6296	13.5402	13.46	13.5206	13.8461	13.6235	13.7412	13.4532	13.673	13.4153	13.3982	13.4445	13.6021	13.3002	13.554	13.6849	13.4257	13.5009	13.67	13.3827	13.5851	13.5626	13.7328	13.6537	13.8569	13.6669	13.8605	13.5993	13.6235	13.4981	13.1986	13.5178	13.4257	13.4257	13.6473	13.1118	13.4338	13.4257	13.3522	13.6849	13.3572	13.4082	13.1923	13.2097	13.0761	13.167	13.253	13.3827
LOC648852	13.1351	12.9252	13.0761	12.9579	13.0308	12.9527	13.1946	13.5571	13.167	13.0841	13.3097	13.1457	13.4205	13.9842	13.4902	13.6602	13.717	13.1878	13.5263	13.2714	13.7549	13.9842	13.5036	14.5204	13.814	13.4007	13.6081	13.4507	14.0363	13.3395	13.245	14.1388	13.5064	13.1057	13.2268	12.9208	13.5968	12.4037	12.8339	13.588	12.967	13.9	13.9468	13.3172	12.8188	12.7855	12.2734	13.201	11.6819
KLRB1	14.2836	14.235	13.6537	14.0159	13.864	13.5234	13.4954	13.9468	14.0281	14.0775	14.0036	13.8605	14.5352	13.8285	14.53	13.72	13.1413	13.657	14.5157	14.024	13.9581	13.821	13.3248	14.3859	13.7844	14.6026	14.055	14.4647	13.3827	13.5824	14.0569	12.993	13.9328	13.4282	13.5766	13.7444	13.588	14.09	14.1835	12.9812	14.4692	13.4572	13.4653	13.9653	13.5178	14.0973	13.5206	13.4845	13.2554
SRP9	13.5824	13.3572	13.093	13.3674	13.1585	13.1351	13.1901	13.5431	12.9083	13.4007	12.7062	13.1585	13.2622	13.3097	13.201	13.0032	13.0841	13.1714	13.0075	13.3876	13.0298	13.3572	13.0952	12.9949	13.1351	13.4418	13.3747	13.0865	13.4572	13.2097	13.2689	13.1057	13.5571	13.2484	13.0521	13.3473	13.0841	13.5263	13.2214	13.5064	13.4257	13.5234	13.1199	13.236	12.8653	13.2763	13.3546	13.4817	13.2577
TPI1	13.4817	13.4007	13.1014	13.3147	13.1457	13.3002	13.0761	13.3147	13.1832	13.3522	13.1225	13.7609	13.3982	13.2052	13.2776	13.1563	13.2859	13.4391	13.3052	13.3648	13.4153	13.0258	12.9598	13.0821	13.236	13.3522	13.3147	13.067	13.3052	13.2714	13.6351	13.3852	13.4968	13.3002	13.6167	13.6411	13.5571	13.4128	13.3901	13.4981	13.2934	13.8676	12.989	13.2934	12.9734	13.1629	13.3395	13.2508	13.4572
HMGB2	13.1158	13.3648	13.1967	13.2029	13.3827	13.5851	13.5851	13.4308	12.7505	13.3194	12.8304	12.9992	13.1519	13.0339	12.9734	12.8829	13.2169	13.063	13.0974	13.1501	13.0479	13.0995	12.9102	12.7667	12.9561	14.0973	13.2291	13.1786	13.224	13.1199	13.241	13.1854	13.2976	13.2976	13.1714	13.1519	13.1854	13.3674	13.2909	13.5345	13.1714	13.2291	13.0317	13.2846	12.8073	13.1413	13.7105	13.4519	13.3172
PPP1CC	13.418	13.4731	13.1878	13.5064	13.1057	13.3419	13.322	13.5968	13.8105	13.5597	12.9373	13.3901	13.5626	13.1967	13.418	13.2484	13.2957	13.3648	13.0479	13.2145	13.2314	13.4308	13.2714	13.346	13.2763	13.9144	13.3074	13.4873	13.4873	13.4418	13.4366	13.3147	13.4859	13.281	13.1036	13.6296	12.9468	13.4007	13.3319	13.5234	13.6758	13.2714	13.224	13.588	13.1832	13.4104	13.3572	13.3346	13.4954
TUBA4A	12.7684	12.5363	13.1225	13.5968	13.2097	13.0012	13.0043	12.928	12.6572	12.6901	13.3572	12.3625	12.3387	13.0995	13.2463	13.0258	12.6228	13.1394	13.7232	13.1457	12.8204	12.8616	13.0117	12.4636	12.7835	12.6654	13.0521	12.8319	12.5291	12.9242	12.5839	13.1714	12.6813	13.5292	13.0739	12.5634	12.9561	13.0032	13.3953	13.6138	12.9552	12.8021	12.6118	13.8005	14.2788	13.3594	13.7974	13.8248	12.5461
FLJ22662	12.7003	13.5091	12.7032	12.7357	12.8509	13.3674	13.0693	13.224	13.1501	12.7749	12.6718	13.9328	13.4817	13.201	13.5766	13.1854	13.1312	13.0012	13.1057	12.9354	13.061	12.9242	13.0055	11.9641	12.9157	12.4748	13.1878	12.7539	13.3622	13.3497	13.1351	13.0963	12.9487	13.0117	13.2664	13.4789	13.3827	13.5794	13.1563	14.0775	13.0382	13.8605	11.975	13.0175	12.8109	12.6556	13.8105	12.8708	13.4628
TGFBI	13.3248	13.4704	13.0651	13.3248	13.2169	13.7412	13.2714	13.4231	13.3028	13.0498	13.5206	13.8861	13.6138	13.1293	13.6411	13.5431	12.8868	13.1371	13.418	13.4059	13.4059	13.3297	13.2314	12.7595	12.9771	12.6167	12.8829	13.2763	13.4954	13.2577	13.201	13.3497	13.7512	13.2689	13.7609	13.7006	13.8423	13.9144	13.0974	13.7006	13.4082	14.1587	13.0952	13.4679	13.0545	13.3002	13.4007	12.4449	13.7266
GLTP	13.3273	13.4205	13.4817	13.5851	13.4034	13.6758	13.6635	13.4572	13.3497	13.4034	13.4789	13.8423	13.8285	13.5373	13.6669	13.493	13.3194	13.4231	13.4495	13.4817	13.554	13.4679	13.4418	13.1539	13.322	13.3699	13.3801	13.3594	13.5652	13.6818	13.568	13.549	13.4572	13.588	13.8791	13.6351	13.224	13.4679	13.1854	13.2789	13.2268	13.5993	13.5709	13.1649	13.0693	13.2599	13.2384	13.2677	13.6537
EIF3B	13.3608	13.2463	13.5851	13.5146	13.6202	13.447	13.351	13.3546	12.9969	13.4059	13.447	13.351	13.3699	12.9335	13.0651	13.061	13.0651	13.067	13.0095	12.827	13.2029	13.1519	13.2763	13.3982	13.2192	13.5036	13.4704	13.1901	13.0382	13.2677	13.0298	13.3594	13.2909	13.549	13.4153	13.2622	12.7524	13.3052	13.6473	13.3002	13.5206	12.9527	13.4731	13.4231	13.4231	13.3648	13.4544	13.3395	13.3771
GIMAP4	13.0145	12.2109	12.4226	13.1118	13.2689	12.0344	11.744	12.0548	11.6154	12.4707	12.1966	12.6104	12.3534	11.3413	11.5258	11.8162	12.0334	11.8383	11.8105	12.0928	11.6723	11.4095	11.3376	11.1322	11.9034	11.6125	11.4103	11.742	12.067	11.7622	12.0958	13.5709	12.3237	12.7096	12.067	11.9718	12.7702	13.1413	13.5009	14.2429	13.0401	12.8171	12.6524	13.4954	12.5363	13.9431	14.2836	14.0363	14.1791
TEGT	13.1878	13.2599	13.235	13.4445	13.4628	13.3827	13.2946	13.4116	13.2339	13.493	13.3147	13.4845	13.4731	13.1808	13.3827	13.4762	13.253	13.2934	13.2622	13.4153	13.0075	13.1563	13.3194	13.5402	13.281	13.063	13.5993	13.1178	13.1247	13.224	13.2599	13.2291	13.0841	13.418	13.3723	13.568	13.3297	13.2076	13.799	13.0258	13.5913	13.2664	13.0498	13.1158	13.2622	13.2833	13.2291	13.0479	13.3622
PRKCB1	13.0693	13.5119	13.281	13.3747	13.3801	13.4519	13.2859	13.3419	13.1704	12.9634	12.7424	12.9812	13.2689	13.3473	13.3622	12.9487	12.9969	13.1649	13.1479	13.1735	13.1501	13.2484	13.3097	13.3674	13.1394	13.2145	13.5146	13.1394	13.2833	13.4873	12.9771	12.7905	13.167	13.3297	13.5146	13.2554	13.4731	13.322	13.1118	13.6381	13.2029	13.0521	13.3771	13.2577	13.2121	13.1808	13.1585	13.1923	13.2145
IGLL1	13.4762	11.8441	13.1808	13.1763	13.8496	13.0651	12.5583	13.5091	14.6291	13.0739	13.0278	13.568	13.0479	13.1735	12.9392	13.8605	12.7407	12.9771	13.0278	13.1108	12.4924	13.1098	13.1312	13.4034	13.1967	12.2884	13.0237	13.8897	13.3594	13.2291	12.4762	12.897	12.6302	13.1629	13.0651	12.8125	14.0856	13.281	14.0321	15.6056	13.8965	13.2076	13.5597	13.1832	14.2388	14.1053	13.4059	13.3522	11.3298
CAMLG	13.3929	13.3473	13.8605	13.5571	13.5064	13.717	13.7412	13.4731	13.4679	13.5402	13.5824	13.4544	13.6108	13.5897	13.7479	13.3297	13.4257	13.5178	13.4845	13.5373	13.691	13.8423	13.4873	13.5345	13.4445	13.8423	13.2484	13.5345	13.5431	13.6266	13.5794	13.7006	13.5373	13.4704	13.4104	13.236	13.3346	13.3297	13.7581	12.9447	13.7743	13.2339	13.4153	13.3929	13.2976	13.4257	13.6503	13.5794	13.3446
MARCKS	13.717	13.2909	12.9157	13.1178	12.9908	13.1694	13.4572	13.2833	13.9543	13.253	13.1479	14.1262	13.554	13.1786	13.4817	13.6444	13.7581	13.2976	12.7003	13.1878	13.1394	12.9771	13.4653	12.8156	12.897	13.1413	13.5431	13.2052	13.3194	13.3273	13.5319	13.7942	13.8965	13.1649	13.3367	13.8965	13.6081	13.7139	12.599	13.3771	13.1068	13.4059	13.4954	12.8457	13.224	12.9316	12.5945	12.9652	13.3929
DDB1	13.2883	13.3002	13.3622	13.3395	13.5571	12.9908	13.0865	13.1351	12.867	13.1967	13.2714	12.993	13.3319	12.6302	12.7602	12.5076	12.6995	12.867	12.8509	12.6988	12.5865	12.8708	12.8329	12.8233	12.7196	12.989	12.9354	12.8288	12.9634	12.7305	12.6302	13.5319	13.1967	13.5794	13.2934	13.1371	12.9157	13.4544	13.7006	13.3953	13.2763	12.9427	13.2957	13.4257	13.3346	13.6411	13.568	13.5913	13.7006
CSK	13.1832	13.1854	13.4418	13.3052	13.3953	13.2437	12.9992	13.2214	13.2664	13.2076	13.2859	13.5206	13.0237	12.8339	12.8935	13.2739	12.914	13.3248	12.7081	12.9487	13.0545	12.9354	13.0651	13.0995	13.0952	12.814	12.9598	12.8725	12.9316	13.3522	13.1394	13.5292	13.3395	13.2934	13.3395	13.418	13.1138	13.0298	13.2976	13.4572	13.167	13.6602	13.5571	13.0521	13.2052	13.5766	13.3674	13.2169	13.6184
ADD3	13.7479	13.549	13.3723	13.3852	13.2029	13.2599	13.1014	13.4059	13.3074	13.6266	12.6197	12.8829	13.2833	12.9969	12.9561	12.9598	13.1832	12.8109	12.5903	12.9102	12.9615	13.1854	13.0195	13.2291	13.0995	13.6473	13.0278	13.2957	13.4762	13.0339	13.2384	13.2192	13.6167	13.3346	13.0012	13.2097	13.1878	13.2833	13.3074	13.3801	13.864	13.447	13.1786	13.0373	13.0421	13.2622	13.1118	13.554	13.0974
LPXN	13.5766	13.3367	12.987	13.3827	13.3194	12.5707	12.8689	13.2268	13.0012	13.2739	13.1735	13.4789	13.281	12.6151	12.2092	12.4395	12.7374	12.7156	12.6686	12.792	12.8319	13.2689	12.5536	12.7734	12.8918	13.3747	12.7635	12.7702	12.6718	12.8902	13.0693	13.4104	13.673	13.4731	13.4007	13.1694	13.063	13.7479	13.4495	13.657	13.6411	13.8039	13.2145	13.6635	12.8562	13.4391	13.7139	13.691	13.8676
SNHG5	13.6669	13.6849	13.1036	13.7643	13.5234	12.5506	13.4902	12.2773	14.1464	13.8496	13.6849	13.4445	12.7003	13.7232	13.6635	12.7196	14.2745	12.897	12.9634	13.7006	12.6167	12.8388	13.4059	13.5431	14.2053	14.3018	12.2317	13.8569	12.8491	12.6347	14.3376	13.3346	13.9617	14.1671	13.3194	13.8605	12.4792	13.6326	14.0775	11.7792	12.7684	13.2599	12.5679	13.1247	13.1629	13.3446	13.673	12.3009	14.1088
PYCARD	12.7803	13.1394	13.0032	12.9734	13.0974	13.1457	12.9852	12.7784	12.9487	12.6865	12.8883	13.588	13.0781	12.7488	12.8868	13.4418	13.0588	13.1312	13.0459	13.0382	13.3097	12.8457	12.9505	12.5206	12.7855	12.6287	12.5722	13.0012	12.9468	13.3546	13.253	13.3395	12.8927	13.1312	13.46	13.4544	13.3852	13.2192	13.1649	13.3982	12.5318	13.2314	13.2463	13.3771	13.2314	13.4845	13.67	13.2677	13.6881
NFKB1	13.2833	13.2508	13.4519	13.3594	13.2052	13.3801	13.4679	13.2484	13.1057	13.236	12.8708	13.1539	13.3028	13.0565	13.0865	13.0216	13.3367	12.7433	13.322	13.0012	13.1946	13.5119	13.281	13.5458	13.3473	13.3827	13.4789	13.0718	13.1435	13.4153	13.1539	13.1293	13.1714	13.3395	13.2076	13.1322	12.9579	13.1351	13.3648	13.5431	13.3419	12.9734	13.3852	13.2121	12.8918	13.1878	13.1606	13.5458	13.5458
ILK	12.8741	12.9734	12.5206	13.447	13.0136	12.9026	12.5918	12.9217	12.8021	12.9598	13.1158	13.1351	12.792	12.6901	12.8473	12.782	12.4339	12.7374	12.6572	12.5163	12.5163	12.3169	12.5887	11.8162	12.4424	12.6768	12.5738	12.2001	12.7888	12.7032	12.6849	13.093	12.8491	13.3473	13.3273	13.0889	12.9354	13.2052	13.0298	13.7609	13.1694	13.46	12.6493	13.2789	13.322	13.4418	13.4817	13.5234	13.5009
DUSP22	13.1986	13.3497	13.4104	13.4704	13.1351	13.3852	13.1649	13.6051	13.0995	13.1036	13.3395	13.3297	13.6081	13.2463	13.1098	13.0155	12.9505	13.1014	12.914	13.1649	13.2833	13.1457	13.3395	12.6654	13.0821	13.3002	12.8288	13.0952	12.9793	13.717	13.1606	13.5402	13.1901	13.4379	13.7549	13.2076	13.402	13.6943	13.6503	13.224	13.4205	13.4153	13.4418	13.4391	12.8953	13.3852	13.224	13.6537	13.0841
SFRS2	13.3953	13.4128	13.3497	13.3446	13.0401	13.1585	13.5571	13.4916	13.5373	13.5345	13.1457	13.5913	13.6758	13.3522	13.0907	13.4007	13.4873	13.1332	13.5292	13.2763	13.3297	13.8965	13.3122	13.588	13.6881	14.1425	13.9617	13.549	13.3346	13.6943	13.9468	13.063	13.3852	13.1901	13.6635	13.3648	13.447	13.4071	13.4653	13.1158	13.6021	13.6051	13.2689	13.3953	12.8596	12.9119	13.0565	13.3622	13.1057
SSU72	13.3002	13.5305	13.6818	13.5913	13.6108	13.4308	13.5036	13.5234	13.241	13.4762	13.8005	13.241	13.2554	13.0382	13.2484	13.1649	13.2121	13.2097	13.1986	13.1158	13.46	13.0799	13.4257	12.989	13.0799	13.2714	13.0995	13.2883	13.1832	13.3002	13.3052	13.6473	13.5263	13.554	13.8676	13.1629	12.8616	13.2664	13.4762	13.2384	13.3319	12.9262	13.9581	13.2599	13.3367	13.771	13.4954	13.4495	13.6051
ROD1	13.5292	13.5009	13.235	13.1946	13.0175	13.2484	13.1079	13.4391	13.1225	13.2976	12.5961	12.8689	13.1735	13.1986	13.3248	13.1519	13.1606	13.2664	13.1763	13.3367	13.3248	13.2463	13.1247	13.236	13.241	13.2463	13.1332	13.224	13.4082	13.2076	13.3929	13.2739	13.568	13.2437	13.2726	13.2254	13.2934	13.3929	13.1539	13.1786	13.554	13.3297	13.2714	13.2214	13.1714	13.3876	13.2437	13.3248	13.6458
SSR4	13.236	13.3801	13.6266	13.5263	13.46	13.4257	13.3419	13.1901	13.5263	13.3473	13.6081	13.2484	12.9615	13.2643	13.2554	13.241	13.2076	13.253	13.3395	13.3747	13.4519	13.1901	13.4231	13.1967	13.2909	13.0278	13.1158	13.5319	13.1763	13.2314	13.0258	13.3248	13.3194	13.4628	13.2384	13.2833	13.2214	13.4495	13.6669	13.1457	13.3395	13.1351	13.5036	13.0339	13.2763	13.5009	13.5146	13.3319	13.304
TNFSF14	13.3608	13.1649	13.4704	13.2052	13.3723	13.0268	13.3572	13.2384	13.1519	12.989	13.281	12.782	12.8156	13.4519	13.0545	13.3002	13.3982	13.2145	13.4391	13.0799	13.5119	13.0195	13.4762	13.9915	13.7549	12.8204	13.6167	13.5178	13.6503	13.1394	12.6938	13.5571	12.9335	13.2384	12.7524	13.0545	12.3014	12.7196	13.2599	13.554	13.0459	12.782	13.911	12.9427	13.5319	13.1435	13.1293	13.5206	12.5062
TAPBP	13.2463	13.4379	13.771	13.5345	13.7809	13.6081	13.6473	13.1413	13.236	13.4231	13.4405	13.4495	13.3674	13.224	13.1563	13.5091	13.5292	13.3674	13.0995	13.4902	13.1519	13.5023	13.0439	13.4704	13.3297	13.4558	13.4231	13.5119	12.989	13.6503	13.7609	13.1606	13.3346	13.5709	13.691	13.5939	13.7777	13.2437	13.3929	13.1986	13.4153	13.2833	13.0278	13.1735	13.0459	13.2643	13.322	13.1158	13.1293
CD69	14.2007	13.5345	13.568	13.5402	13.588	14.4043	14.6026	14.4043	14.6073	14.3333	13.3699	13.9363	14.3947	14.6457	14.764	14.3674	14.7885	14.6026	14.6457	14.8576	14.5658	14.8269	14.6073	14.6026	14.5704	14.8838	14.7397	14.5109	14.4269	14.4083	14.6235	13.3419	14.1262	13.8423	13.5737	13.7549	13.9956	13.8174	13.1293	11.7679	14.4127	13.6669	13.8791	13.698	13.5913	13.4308	12.1255	12.2785	11.9206
LOC643357	13.4128	13.2859	13.3297	13.2145	13.0865	13.2909	12.9694	13.2314	13.2909	13.5091	13.2909	13.9	13.8791	13.46	13.3319	13.2076	13.3028	13.236	13.3419	13.5146	13.2484	13.7844	12.9007	12.9007	13.3852	13.9292	13.1923	13.2268	13.3248	13.7875	13.9693	13.1036	13.4968	12.9908	13.6051	13.5091	13.5064	13.3367	13.2622	13.3367	13.2976	13.8529	13.3097	13.201	12.897	13.1763	13.1539	13.3097	13.3367
C11orf10	13.1694	13.2643	13.5571	13.1585	13.4257	13.3367	13.1629	12.9007	13.4405	13.554	13.3419	13.2291	13.0565	13.2934	13.1606	13.4104	13.1878	13.46	13.4282	13.4418	13.322	12.8758	13.1986	12.7081	13.2291	13.418	12.9714	13.5652	13.2622	13.0521	13.3147	13.3982	13.1457	13.2714	12.967	13.4128	13.1923	13.2121	13.5866	13.2508	13.2291	12.9411	13.2859	12.9102	13.1763	13.4544	13.3194	13.1098	13.4817
DNCL1	13.2763	12.7225	12.1551	12.844	12.7667	11.9452	12.0102	12.2637	12.5263	12.713	12.667	13.1479	12.6901	12.2194	12.3926	12.4449	12.4037	12.5347	12.8653	12.7196	12.1322	11.9804	11.8847	11.3757	11.9248	12.5461	11.5868	11.8581	12.2734	12.5291	12.4908	13.4495	13.1786	12.827	13.2577	12.8953	13.2883	13.46	13.224	13.9543	13.3172	13.5737	12.4037	13.6266	13.3827	13.2934	13.5402	13.6081	13.691
FTH1	12.8355	12.928	12.7003	12.6572	12.6813	13.4338	13.2599	13.1057	13.4762	13.1519	13.6586	14.0662	13.5431	13.6167	13.7266	14.0321	13.9	13.673	13.8248	13.717	13.9503	14.0973	14.1262	13.4789	13.4902	13.7006	13.9202	13.814	13.6881	13.7659	13.8825	13.8791	13.2859	12.6197	13.1808	13.4034	13.9363	13.2097	12.4325	12.8634	12.8073	13.6351	13.3419	13.6881	13.7105	12.9392	12.9026	12.8304	13.1714
LOC401115	13.0298	13.1832	13.5737	13.4308	13.6081	13.5319	13.5402	13.0032	13.0317	12.914	13.4704	13.3953	12.8251	12.9411	13.1199	13.224	12.9335	13.5652	12.9652	12.8171	13.4731	12.7338	13.771	12.7684	12.8204	12.5536	13.1098	13.2076	12.9373	13.1808	12.9427	13.6235	13.0439	13.6881	12.1216	13.2052	12.8491	13.0117	13.3194	12.989	12.9354	13.1332	13.7232	13.4104	13.3953	13.8316	13.8791	13.2029	13.7875
RARRES3	13.6108	13.2192	13.3122	13.554	13.5416	13.1036	13.253	13.0298	13.0974	13.5626	13.7412	13.4762	13.6351	13.3346	12.9505	12.9157	13.0439	13.2339	13.3473	13.5036	13.3028	13.0298	12.6272	13.0278	13.1912	13.5709	13.061	13.2384	12.7734	13.0907	13.6669	13.3953	13.0865	13.4082	13.5402	13.253	13.4704	13.1371	13.447	12.8544	13.4731	13.0718	13.3674	13.5571	12.8725	13.7549	13.2029	13.657	13.4762
ATP6AP2	13.2976	13.3446	13.0175	13.2934	13.2859	13.224	13.2763	13.4954	13.3699	13.281	12.6736	13.1413	13.3346	13.3395	13.3052	13.3522	13.1371	13.1967	13.0739	13.2909	12.9102	13.1014	13.3052	12.9373	13.1986	13.1079	13.3346	13.3876	13.4532	13.3929	13.4519	13.2384	13.2689	13.2859	13.1014	13.46	13.2957	13.554	13.0136	13.5709	13.4418	13.493	12.8388	13.3852	13.1079	13.0651	13.1986	12.9771	13.4495
UXT	13.4731	13.4902	13.8248	13.8174	13.7479	13.8174	13.7595	13.6351	13.7038	13.8791	13.7074	13.2934	13.5319	13.4544	13.5146	13.3122	13.4034	13.6411	13.5709	13.7353	13.588	13.3319	13.6943	13.3953	13.7942	13.5766	13.5119	13.7676	13.3759	13.554	13.4954	13.4082	13.3699	13.6785	13.281	13.2463	13.5345	13.2883	13.8392	12.6447	13.6138	13.2763	13.4995	12.897	12.7305	13.224	12.9624	13.2726	12.782
STAT2	13.2622	13.0258	12.9007	12.9752	13.1371	12.8725	12.7602	12.7241	13.2967	12.8741	13.1946	13.7074	13.2076	12.5134	12.5752	13.1629	13.1967	12.8776	12.6718	12.5347	12.7651	12.9119	12.8388	12.6432	12.867	12.5857	12.6317	12.4161	12.7539	12.6382	13.2169	13.3546	12.7032	13.0363	12.9969	13.4391	13.8073	13.1649	12.8038	13.6635	13.0216	12.9316	13.253	13.8105	12.6347	13.0974	13.1199	12.9065	12.9598
FAM73A	13.1808	13.0278	13.1629	12.8653	13.2192	12.9543	13.1854	13.447	13.1079	13.061	13.1878	12.8251	13.3771	13.598	13.4762	13.5402	13.691	13.1247	13.5178	13.2384	13.9017	13.6138	13.3572	14.4177	13.9292	13.4104	13.4653	13.447	13.9	12.9354	12.9793	13.864	13.2463	12.8425	12.9335	13.167	13.3028	12.369	13.167	13.236	12.8988	13.67	13.9956	13.0889	12.8793	12.4939	12.3639	13.3446	11.8944
LITAF	13.6266	13.6537	13.4572	13.418	13.5416	13.4762	13.3546	13.3876	13.3147	13.8105	13.5178	13.2076	13.1763	13.67	13.3901	13.5458	12.692	13.3572	14.0321	13.6296	13.9017	13.7875	13.3747	13.657	13.4034	13.7479	13.6351	13.5263	13.2643	13.418	13.8676	13.241	13.1394	13.3097	13.4082	13.0363	14.0937	13.4762	13.2384	12.6182	13.2554	13.4231	12.914	13.3522	13.7074	13.0907	12.5448	12.8528	13.46
LOC651149	14.0856	13.691	14.4083	13.717	13.4153	13.8825	13.7232	13.6411	14.3062	14.5865	13.9399	13.5626	13.588	14.1753	13.46	12.8596	13.4519	13.447	13.9503	13.8285	13.6537	13.6444	13.6326	13.8861	13.911	13.3419	13.8073	14.29	13.5091	13.6635	14.1014	13.3097	13.7266	13.7412	13.6537	13.4495	12.9026	13.7444	14.3235	13.1332	14.5401	12.5377	13.5345	13.717	12.7936	13.9328	13.3297	13.8316	13.1878
FGL2	12.9065	12.8725	12.3586	12.9026	12.9969	12.104	12.5553	12.6798	12.9392	12.4678	12.4651	13.8039	13.3546	12.4479	13.0498	13.2689	13.0032	13.0588	12.2859	13.0136	12.8935	12.4309	12.3861	11.2277	12.3169	12.0364	12.6174	11.8503	12.9812	13.0012	13.0545	13.6138	13.0521	12.9579	13.5292	13.7353	14.0506	13.3876	13.0421	13.5626	12.9771	13.6167	12.7602	13.4731	13.0952	13.3674	13.2934	13.1371	13.7139
NFS1	13.598	13.3901	13.1986	13.6473	13.8755	13.6537	13.5319	13.4916	12.9505	13.5571	13.5292	12.485	12.5752	13.6296	13.4572	13.2957	12.7953	13.7038	13.6537	13.6744	13.2946	12.8171	13.2643	13.1413	12.6798	13.2484	13.8174	13.4981	12.6214	12.9949	12.4137	13.0373	13.1036	14.024	13.5652	12.8055	12.9908	13.1986	13.4731	12.9505	13.2121	12.6151	13.673	13.3074	13.1394	13.6943	13.3122	14.0201	13.9431
VIL2	13.281	12.9812	13.3572	13.4391	13.5345	13.8965	13.4082	13.6326	13.4954	13.3346	13.5119	13.0952	13.2145	13.5709	13.5319	13.3346	13.5373	13.691	13.4104	13.4366	13.4495	13.7266	13.3622	14.1425	13.6993	13.3546	13.9994	13.5516	13.6326	13.6537	13.3172	13.3622	13.1138	13.4981	13.3982	13.1138	12.967	13.0498	13.5794	13.4059	13.418	13.2169	13.5206	13.0545	12.9119	13.7353	12.8579	13.4731	13.2909
IL7R	13.9034	13.2577	13.7353	13.4954	13.5794	12.9199	12.7986	13.1457	13.673	13.9769	13.0841	13.4902	14.0937	12.9861	13.0459	12.4823	13.2437	13.0995	13.1014	13.3522	12.4354	13.8039	12.9373	13.6051	13.3028	13.6503	13.1371	13.3122	13.3419	13.1629	13.7693	13.1629	13.5292	13.3852	12.8233	12.6654	13.9076	13.3572	13.7676	13.1293	14.2606	13.6473	12.7374	13.3801	12.9191	13.6266	13.549	14.3018	12.1619
IFP38	12.9335	13.6167	13.9	13.5516	13.4981	13.6785	13.6381	13.5345	13.5968	13.6235	13.6051	13.0545	13.1435	13.5597	13.657	13.236	13.4418	13.4282	13.4308	13.5263	13.3674	13.3028	13.6138	13.4981	13.6266	13.1763	13.4817	13.5292	13.6167	13.1606	13.0012	13.2339	13.7809	13.5206	13.1351	13.281	13.1199	13.3194	13.8605	12.9175	13.6235	13.1923	13.4679	12.6182	13.2859	13.4981	13.253	13.2763	13.2437
LOC402644	13.4205	13.2076	13.2291	13.0565	12.9392	12.7196	12.9411	13.1158	13.1271	13.3699	13.4082	13.554	13.6602	13.1606	12.9615	13.2789	13.3473	13.0545	12.8725	13.2689	12.914	13.2909	12.6849	12.4255	13.0075	13.5838	12.7256	13.0761	13.0339	13.5993	13.5851	13.1649	13.5794	12.7032	13.4282	12.814	13.4391	13.1901	13.3594	12.8596	13.0974	13.3674	13.1057	13.6785	13.3699	13.8174	13.7875	13.46	14.1835
FLJ40722	13.2268	12.9026	13.0298	12.6478	13.0278	12.9316	13.0739	13.3699	13.4034	12.8233	13.2883	12.5476	13.1332	13.5119	13.1247	13.4445	13.5206	12.9834	13.3367	13.0459	13.4104	13.3522	13.1629	14.2745	13.9144	12.8883	13.6021	13.3172	13.7074	12.9652	12.9487	13.6881	13.4104	12.7702	12.8544	12.867	12.993	12.352	12.881	13.5036	12.6621	13.4666	13.7266	13.0421	13.1413	12.519	12.5219	13.0032	11.8581
BRD2	13.3901	13.2789	13.4257	13.3622	13.4128	13.6351	13.5373	13.4495	13.3801	13.3367	13.4679	13.316	13.2976	13.2622	13.447	13.4366	13.3572	13.2508	13.2029	13.4704	13.4544	13.447	13.3497	13.493	13.5178	13.3172	13.5064	13.3901	13.2052	13.3723	13.1098	13.3473	13.0421	13.2097	13.4445	13.1057	12.814	13.4153	13.1138	13.0799	13.3901	13.1413	13.3147	13.3028	13.1694	13.167	13.2268	13.1986	13.2484
PRKAR1A	12.2773	11.3797	12.0821	13.3982	13.1271	12.0057	12.5219	13.201	12.987	12.6088	13.0889	13.281	12.7986	12.2294	12.5076	12.6088	11.4686	13.1606	12.8616	12.4777	12.8021	12.9226	12.5931	11.9936	12.4173	10.8933	11.9388	12.8425	12.6832	12.4479	12.5931	13.6296	13.7006	12.5363	13.3522	13.3747	13.5234	13.9431	13.3546	14.055	11.5659	12.2859	13.2029	13.7232	12.7114	13.6021	13.1629	12.7986	13.4519
PRNP	13.4082	13.447	13.3248	13.2577	13.2254	13.5968	13.5064	13.4679	13.6351	13.5458	13.0339	13.5263	13.568	13.5263	13.8861	13.6473	13.4495	13.5939	13.5516	13.5597	13.4572	13.9617	13.6444	13.3929	13.6785	13.5345	13.6503	13.4902	13.5571	13.4679	13.4873	13.4954	13.3674	13.3172	13.5345	13.5709	13.2643	13.6537	13.0055	13.3172	13.5064	13.4845	13.2833	13.3346	13.4034	13.1098	12.8021	12.8002	13.304
QARS	13.4059	13.6881	13.5263	13.7266	13.4082	13.5431	13.4519	13.6758	13.1649	13.3827	13.6138	13.0317	13.3097	13.1946	13.241	12.9335	13.0258	13.3446	13.2934	13.2957	13.2052	12.993	13.5597	13.3028	13.2437	13.2384	13.5248	13.2909	13.2145	13.1413	12.8634	13.2052	13.2643	13.6235	13.4034	13.2714	12.6151	13.3028	13.7353	13.0195	13.67	12.7114	13.3319	13.0298	13.1332	13.5091	13.4519	13.182	13.505
LOC653888	12.6432	12.8109	12.8355	12.8758	12.5544	12.5679	12.7225	12.7163	12.782	12.6813	13.1138	13.1435	12.8848	12.8662	12.8457	12.8579	12.6901	12.9634	12.8156	12.6572	12.8109	12.5887	12.7448	12.3159	12.5432	12.6214	12.349	12.8741	12.6813	13.0865	12.8021	13.2029	12.7635	12.8055	13.3852	13.2789	13.1606	13.1714	13.093	13.5402	12.8848	13.1539	13.1735	12.9634	13.1606	13.1247	13.1946	13.4366	12.9852
SNRP70	13.3876	13.2883	13.4153	13.6296	13.5626	13.4704	13.418	13.4338	13.3446	13.3864	13.1901	13.3028	13.3522	13.1025	12.9812	13.2508	13.3771	13.1225	13.2957	13.1832	13.182	13.5178	13.4628	13.7974	13.5516	13.5458	13.6444	13.6296	13.3901	13.3901	13.4231	12.9191	13.1923	13.4153	13.2339	12.8188	13.061	13.1014	13.2076	12.9354	13.3194	13.3172	13.3172	12.9411	12.6478	13.1293	13.1854	13.4007	12.7488
CDC42SE2	13.568	13.5709	13.4679	13.3172	13.2145	13.3319	13.2946	13.6108	13.1413	13.5178	13.1293	13.2145	13.5064	13.5064	13.5119	13.1158	13.554	13.2577	13.4762	13.6138	13.0799	13.4257	13.0075	13.7444	13.2714	13.5737	13.4981	13.3827	13.4104	13.5652	13.4282	13.0781	13.549	13.1763	13.3953	13.3097	13.067	13.0907	13.5132	13.0821	13.5993	13.4789	12.9969	13.4338	13.2957	13.3395	13.0095	13.5064	13.1036
C10orf54	13.0545	13.4817	13.1098	13.1247	13.3648	13.1808	12.9157	13.2029	13.0401	13.0155	13.2192	13.3572	12.9949	12.9543	13.1225	13.2976	13.0317	13.3367	13.3194	12.987	13.3699	12.6572	13.236	12.8634	12.7702	12.8125	12.8473	13.093	13.0739	13.2789	13.067	13.4519	13.3122	13.0401	13.3572	13.3827	13.0339	13.1923	12.875	13.7105	13.0155	13.0117	13.3953	13.1138	13.0363	12.8388	13.236	12.7003	13.4104
SERPINB6	13.3319	13.5431	13.1057	13.6537	13.568	13.3622	13.2314	13.4789	12.9026	13.0565	13.2763	12.9782	12.9316	12.8156	13.1539	12.4537	13.1923	13.093	13.2133	12.9157	12.9298	12.8404	12.9411	12.9734	12.9505	11.8105	13.2554	12.7305	12.6541	13.1501	12.5887	13.3297	12.7241	13.5373	13.1923	13.1539	12.5305	13.3395	13.3771	13.4817	12.9411	12.8219	12.7702	13.1271	13.0799	13.46	13.6602	13.1118	13.5794
CASP1	12.8829	13.1946	12.5233	12.9992	13.1854	12.6151	12.4187	12.6885	12.8233	12.6832	12.5076	13.698	12.867	12.6524	12.6784	13.1014	13.0055	13.1079	12.7441	12.7872	13.1332	12.4367	12.6478	12.4594	12.6382	12.8219	12.698	12.2404	13.1639	12.9543	13.2957	12.9427	13.2268	12.9793	13.2599	13.4418	13.4495	13.2739	13.1036	13.4845	12.6478	13.4666	12.8883	13.6235	12.9949	13.3074	13.4873	13.2097	13.4731
PSMC1	13.1786	13.3622	13.3522	13.1606	13.1763	13.5119	13.2554	13.3771	13.1585	13.2214	13.0907	13.3546	13.1271	13.1714	13.3172	13.2169	13.2976	13.2909	13.3346	13.1786	13.4104	13.3346	13.3419	13.3395	13.2833	13.5516	13.5737	13.2029	13.1923	13.0821	13.0865	13.1923	13.0155	13.2214	13.2097	13.3982	13.1158	13.3074	13.3827	12.9411	13.2145	13.3122	13.2268	13.3194	13.0498	13.2859	13.1808	13.1563	13.2833
EIF3G	13.201	13.3982	13.4954	13.3273	13.549	13.2883	13.4981	13.1138	13.3097	13.5206	13.588	13.1967	13.1479	13.3446	13.4338	13.2214	13.3901	13.4166	13.4817	13.4845	13.4954	12.9102	13.2909	13.4519	13.4059	13.0952	13.1394	13.6602	13.2909	13.1694	13.236	13.1501	13.0907	13.4519	13.241	13.063	13.1786	13.1479	13.6785	12.6524	13.2463	13.0545	13.2384	13.0216	13.2192	13.5146	13.2314	13.2833	13.2934
ZYX	12.897	13.0055	12.9044	13.2599	13.1714	13.5737	13.4007	13.0718	13.1332	12.928	13.2957	13.5064	12.6072	12.9793	13.3297	13.2934	13.0363	13.1351	13.0439	12.8988	13.1178	12.8689	13.1832	12.5432	12.797	12.4367	12.8848	13.0175	13.1967	13.4519	13.2029	13.0841	12.6541	13.2883	12.8653	13.1247	12.9505	12.6541	13.0195	13.2268	12.4664	13.1079	12.9579	12.8473	13.2268	13.0588	13.2145	12.7702	13.4282
LOC651064	13.4391	13.2121	13.8496	13.2883	13.5939	13.6602	13.6602	13.3929	13.3876	13.3771	13.3876	12.9119	12.8055	13.3786	13.2577	13.2192	13.3419	13.3002	13.4007	13.2622	13.418	12.8002	13.549	13.1832	13.3446	12.9289	13.1199	13.3395	13.2976	12.7803	12.8371	13.4981	13.2192	13.5458	12.9992	12.9543	12.7554	13.1854	13.5993	12.8204	13.2909	12.9908	13.493	12.7684	13.4954	13.4495	13.554	13.5345	13.447
DPYSL2	13.1108	13.1079	12.6493	12.9208	12.7424	12.8171	12.6784	13.0012	13.093	13.0459	12.8953	13.6138	13.3297	12.4506	12.9242	12.8288	12.7554	12.9992	12.3159	12.8562	12.6798	12.6901	12.6013	12.2157	12.5506	12.7391	12.6524	12.7212	13.0439	13.3953	13.4257	13.5091	13.2029	12.651	13.4128	13.554	13.4128	13.5292	12.7338	13.7266	13.0258	13.8174	12.7407	13.3876	12.9447	13.0382	13.1501	12.797	13.6785
LOC653226	13.253	13.2314	13.0479	13.2097	13.1199	12.8953	13.0545	13.2714	13.1098	13.1946	12.4112	12.9969	13.2463	13.1079	13.1138	12.9852	12.9191	12.7081	12.9083	13.2789	12.6885	12.9543	12.928	12.782	12.9226	13.2339	13.1247	12.9606	13.2214	12.8528	13.1854	12.9316	13.2508	12.988	13.0175	13.1271	13.1312	13.241	13.2192	13.1714	13.3723	13.2192	12.8425	13.1901	12.7241	13.3052	13.2097	13.1967	13.093
C3orf60	12.8109	12.5576	12.8528	13.1371	13.1479	12.7587	12.9793	12.5903	12.6502	12.7407	13.1967	12.7803	12.4437	12.4623	12.6135	12.7651	12.3288	12.7667	12.7784	12.6463	12.5536	12.1098	12.5363	11.7701	12.2835	12.3505	12.0526	12.4131	12.4896	12.485	12.365	13.2076	12.5568	13.224	13.0278	12.9949	12.9226	12.9505	13.2463	13.3028	12.9026	12.6718	13.0889	13.0995	13.549	13.2957	13.4082	13.698	12.928
LST1	12.5263	13.1539	12.9793	12.9007	12.5679	12.9427	11.3269	12.8473	13.3194	12.8251	12.9468	13.6881	12.7288	13.1479	13.2145	13.8423	13.3723	12.4492	13.2463	12.8288	13.6351	13.067	13.1585	12.7524	12.352	11.7272	12.369	12.7651	13.2484	13.0545	13.8569	12.9714	12.7702	12.8473	13.1986	13.6537	12.8953	13.2291	11.6284	13.447	12.0729	13.5968	12.7032	13.8569	13.2934	14.117	13.8897	13.6849	14.0662
COX5A	13.067	13.2268	13.2214	13.0339	13.3147	13.2463	12.9949	13.2121	13.063	13.1629	13.1413	13.0401	13.1138	12.8918	13.1342	13.2909	13.0739	13.3953	13.2643	13.1986	13.4104	12.8188	13.2789	12.4339	12.8776	13.0974	12.9771	13.1158	13.0136	12.9226	13.0907	13.3319	13.3522	13.2339	13.2463	13.3194	13.2484	13.3002	13.1178	13.0498	12.881	13.2739	13.3346	13.2957	13.201	13.5036	13.447	13.2622	13.322
VDAC3	13.1539	12.989	12.8776	13.241	12.8528	12.6703	12.4466	12.8319	12.7163	13.1332	12.8988	13.1735	13.0761	12.5177	12.7803	12.7374	12.7635	12.8125	12.6813	12.8156	12.5839	12.967	12.5149	12.3044	12.8741	13.1519	12.6118	12.5976	12.7288	12.4226	12.7872	13.1424	13.0963	12.9598	12.9487	12.8371	13.167	13.2484	13.2714	13.4007	13.1199	13.3074	12.797	13.4902	12.9242	13.0952	13.1649	13.3546	13.3497
DUSP19	13.0841	13.3852	12.8288	12.9694	13.1967	12.8425	12.7651	13.0865	13.3002	12.8509	12.9812	12.9262	13.0521	13.5178	13.3446	13.2643	13.6167	13.3419	13.3122	12.9026	13.6635	13.657	13.4731	14.2521	13.493	13.2934	13.1479	13.1413	13.8073	13.1057	13.1479	13.7074	13.3929	12.8708	12.8073	12.9852	14.2429	12.3412	12.7505	13.6021	13.1735	14.0775	13.5263	12.5522	12.2822	12.6875	11.9044	12.897	11.3399
LOC51035	13.2029	13.2291	13.5794	13.3497	13.4104	13.4544	13.4308	13.4817	13.2554	13.2763	13.3594	13.0865	13.3273	13.1585	13.224	13.3497	13.3827	13.3901	13.3852	13.4104	13.3929	13.3002	13.4679	13.3648	13.5652	13.2789	13.5597	13.2934	13.0032	13.3194	13.1923	13.253	13.1878	13.5064	13.0479	13.061	13.0545	13.1878	13.3723	12.6752	13.3522	13.063	13.4323	13.0799	13.1457	13.3901	13.3901	13.0278	13.0278
RAB31	12.5679	13.1312	12.5506	13.0439	12.8156	12.9487	12.7749	12.9561	12.7784	12.5036	12.7241	13.2957	12.7324	12.581	13.0799	12.8741	12.4149	12.7433	12.6885	12.6703	12.6287	12.6088	12.9527	12.2001	12.4049	11.9683	12.7047	12.6493	12.9262	13.1247	12.7305	12.8634	12.4522	12.797	13.1435	13.2739	13.3395	12.9969	12.747	13.3346	12.6605	13.2029	12.6938	13.2029	13.167	12.8918	13.4391	12.6524	13.1946
FYB	13.0032	13.0718	12.9102	13.0382	12.9447	12.667	12.7587	12.8741	12.9226	13.4128	12.3134	13.1293	13.4845	12.9226	12.4748	12.9242	13.0278	12.7702	12.7702	13.1435	12.8125	13.3497	12.5448	13.1098	13.2554	13.5939	12.8918	12.9026	13.1271	12.9852	13.3747	13.1519	13.1763	12.8544	12.6813	13.2689	13.4104	13.2554	12.9834	13.3446	13.5373	13.4902	12.5149	13.5993	12.9354	12.867	12.8883	13.0298	12.8339
STAT1	13.0498	13.0521	12.3546	12.8055	12.7617	12.1846	12.3849	12.6151	12.7684	12.2466	12.12	13.5119	12.5778	12.3198	12.1717	13.3419	13.2508	13.2763	12.2944	11.921	12.5391	12.6971	12.059	12.6287	12.6768	12.1344	13.0718	12.1121	12.7114	12.6953	13.2291	12.6718	12.7391	12.2684	12.5305	13.3497	14.1088	12.5377	12.5347	13.2076	12.782	12.8528	13.0237	14.3423	13.1371	13.281	12.9908	12.9615	13.1735
RBM22	13.2314	13.0588	13.0117	13.1225	13.0761	13.4007	13.2384	13.4007	13.2437	13.0521	13.1519	13.3367	13.5277	13.2763	13.2976	13.0298	13.1986	13.0821	13.3172	13.3319	13.4653	13.5345	13.0841	13.3622	13.4338	13.7038	13.5248	13.1854	13.1057	13.2484	13.3248	12.9969	13.0339	13.0339	13.1878	12.9298	12.8055	13.0889	12.9969	12.9392	13.3346	13.281	13.0761	13.4495	12.9752	13.0821	13.1332	13.0117	13.3546
NDUFB2	13.2909	13.1457	13.3273	13.1138	13.4519	13.1383	13.1878	12.7835	13.2097	13.3002	13.3346	13.3674	13.2097	13.2339	13.0421	12.8935	12.8698	13.0952	13.1854	12.9527	13.2577	12.8038	12.967	12.8689	13.1854	13.0075	12.8339	13.1293	12.8528	12.9468	13.2214	13.1178	13.1629	13.2763	13.0382	13.3052	13.0761	13.3723	13.6351	12.9226	13.2577	12.9226	12.9354	13.2463	13.0588	13.5263	13.4902	13.2052	13.6235
CALM1	13.5626	13.241	13.2437	13.2643	13.2833	13.1501	13.1371	13.241	13.1563	13.4679	13.1435	13.0841	13.3248	13.1394	13.1878	12.7288	12.9487	13.0195	13.2577	12.9298	12.897	13.2763	12.8156	13.2821	12.989	13.5234	13.2714	13.1539	12.9752	13.0739	13.0781	13.1351	13.4231	13.46	13.4817	13.1808	13.5993	13.2909	13.1694	13.0907	13.5119	13.5146	13.0195	13.2314	12.8616	12.9908	13.0012	13.0841	13.5319
GNG11	11.3845	12.4137	12.4609	14.09	12.34	12.4282	12.3598	12.2466	12.9598	12.3783	13.3801	11.8759	10.6779	12.9242	13.4391	13.4789	11.9825	13.4995	13.2763	13.1014	11.6838	12.0989	12.041	10.7021	11.8143	12.2846	11.9494	12.5522	12.867	12.1775	11.7967	11.669	12.5076	13.3723	13.1786	13.0317	13.0175	13.4981	13.6021	13.7974	12.4537	13.1878	11.4635	14.4221	13.9693	13.5516	13.5626	14.6026	11.5533
SIPA1	13.3419	13.3147	13.3395	13.3367	13.7942	13.2384	13.3273	13.4082	13.2192	13.2554	13.568	13.2097	13.3172	13.1457	13.2384	12.9175	12.9242	13.0718	12.8196	13.2599	12.9949	12.9694	13.0588	12.9102	12.7986	12.7148	13.0545	13.0995	13.0479	12.9298	12.6242	13.2437	13.0195	13.7512	13.418	12.6159	12.1943	13.2145	13.1946	12.713	13.3572	12.9026	13.2789	13.253	13.2789	13.5993	13.3771	13.1457	13.1786
GLRX5	12.9044	12.8319	13.1247	12.7391	13.0308	13.0382	13.0421	12.7047	12.7539	12.9949	13.0952	12.897	12.7047	12.6541	12.8304	12.8491	12.5419	12.9468	12.519	12.7617	12.8741	12.3096	12.9335	12.3263	12.5722	13.0841	12.7835	12.8164	12.4939	12.6104	12.6971	13.0258	12.827	13.0175	12.9007	12.8653	12.4268	12.9262	12.9007	12.602	12.7148	12.5722	13.1629	12.8355	15.4366	13.2508	13.4366	12.7163	13.0693
SH3KBP1	13.0012	13.1735	13.1079	13.0841	13.3876	13.1763	13.2121	12.8596	12.9752	13.241	13.0521	12.9007	12.8725	13.0799	13.2192	13.2859	12.867	13.2029	13.0195	13.2314	13.2291	12.9487	13.1786	13.061	13.1057	13.1138	12.9102	13.1749	13.1539	13.1435	12.9682	13.1199	12.7835	13.1735	13.0907	13.2664	13.0117	13.0136	13.4059	12.9561	13.2192	13.0651	13.1293	12.7455	12.8758	12.8935	13.1036	13.236	13.0889
LOC400948	12.7241	12.6167	12.928	12.9561	12.7595	12.5233	12.5305	12.2797	12.8741	12.7241	13.1014	12.4492	12.0344	13.1332	13.0963	13.1138	12.7872	13.1036	13.4338	13.1808	12.9226	12.1883	12.4449	12.3961	12.7047	12.3703	12.2452	12.6197	12.5794	12.3313	12.3797	12.5049	12.8457	13.1293	12.8339	12.8038	13.1079	13.1797	13.2957	13.1763	12.7272	12.7196	12.5794	13.6351	13.5091	13.061	13.0739	13.9617	12.5634
ACTR2	13.5234	13.418	12.6334	12.4808	12.365	12.3033	12.4367	12.6197	13.1854	13.1563	12.0843	13.1271	13.253	12.8371	12.7357	12.9083	12.4354	12.7749	12.3914	12.7505	12.9516	13.322	12.2501	12.897	12.6174	13.4338	12.4939	12.7554	13.1312	13.4257	13.3801	13.0479	13.3497	12.3237	13.2484	13.4153	13.3052	13.5234	13.1832	13.7581	13.4445	13.2121	12.8233	13.3982	12.8038	13.0995	13.093	13.2339	13.5571
PLDN	13.2664	12.9487	12.8689	12.6417	12.867	12.9226	13.0401	13.3273	13.2121	12.7554	13.201	12.8355	13.0821	13.6235	13.1457	13.3901	13.4789	12.9392	13.2076	12.9447	13.5206	13.3367	13.4007	14.5006	13.8605	12.8002	13.1763	13.3674	13.8461	12.8251	12.5107	13.3747	13.0588	12.8457	12.5036	12.8776	13.0521	12.4137	13.0521	13.4789	12.6971	13.2934	13.6326	12.5391	12.4982	12.7587	12.2908	13.1946	11.8152
HMG1L1	13.4572	13.2169	13.1714	12.7407	12.5291	12.4149	12.7572	12.9598	13.2689	13.201	12.9487	12.7684	13.4679	13.3594	12.967	13.1585	12.8002	12.8935	13.0799	13.0258	13.1118	13.4231	12.3546	13.1271	12.914	13.8897	12.9478	13.1014	13.3497	13.2763	13.4572	13.2214	13.4495	12.5177	13.493	13.3723	13.2052	13.0739	13.568	13.0588	13.3473	12.8473	12.9527	13.1098	12.8935	13.0889	12.9598	13.673	12.9714
MAPKAPK3	12.9242	13.1786	12.9217	13.0237	13.0382	13.1236	12.993	13.0952	13.1371	12.9083	12.9026	13.1714	12.967	12.9083	13.1501	13.0952	12.8883	13.4544	12.9694	12.8689	13.2076	12.8125	13.3346	12.6588	12.7587	12.244	13.0136	12.7455	12.7936	13.1118	13.0075	13.2859	12.6849	12.8171	12.8251	13.2169	12.488	12.993	13.2029	13.1923	12.8156	12.6621	13.5292	12.7554	13.1178	13.2484	13.1901	12.881	13.7609
AXUD1	13.4153	13.1878	13.3747	13.1986	13.2643	14.0626	14.3193	13.8861	14.764	13.8755	14.0856	14.4221	14.1464	14.6913	14.7697	14.2053	14.6179	14.4851	15.0605	14.53	14.4647	14.964	14.7155	14.7034	14.2698	13.8825	14.9371	14.1875	14.07	14.3144	14.227	13.5913	13.4338	13.3622	13.2833	13.6138	13.5009	13.588	12.914	12.0473	13.3446	13.1563	13.4873	13.2739	13.8248	12.5062	12.2859	11.7582	12.3875
RBX1	12.9191	12.7272	12.4339	12.6135	12.5062	12.1681	12.1403	12.1167	12.5163	12.6006	12.651	12.5049	12.4295	12.7256	12.6798	12.989	12.7256	12.6628	12.6798	12.8634	12.5432	12.2036	12.3211	11.9161	12.4506	12.4678	12.0703	12.4282	12.6703	12.1871	12.7256	12.7936	12.9852	12.7718	12.6167	12.8741	13.3901	13.1118	12.9949	13.4082	12.7096	12.9505	12.7256	13.8529	13.2714	13.2726	13.1519	13.3583	13.1014
LIMS1	12.692	12.3797	12.6006	13.2339	12.5945	12.3505	12.2773	12.5291	12.565	12.7626	12.4037	12.7505	12.3598	12.2996	12.6214	12.5177	12.2049	12.2036	12.3211	12.3715	12.2513	12.2697	12.2525	11.1748	12.0155	12.4707	11.6536	12.1751	12.4062	12.5149	12.5672	12.7684	12.7081	12.8562	12.9634	12.6159	13.1293	12.6938	13.0258	13.3497	12.8579	13.3622	12.5492	13.568	12.987	13.1735	13.1457	13.9252	12.7888
M6PRBP1	12.5091	12.8388	12.8562	12.7734	13.0195	13.3546	13.2577	13.0155	12.9652	12.667	12.989	13.0439	12.4565	12.8038	12.9694	13.201	13.0012	13.1118	13.0841	13.2029	13.1079	12.394	13.3674	12.2307	12.7391	12.352	13.0799	12.9908	12.9289	12.8708	12.8935	13.4762	12.8509	13.1118	13.0761	13.0974	12.9834	12.9694	12.797	13.3583	12.394	12.8304	13.0479	12.5448	12.8125	12.8793	13.3346	13.0718	13.3297
RHOG	12.4968	13.0739	12.8073	12.881	12.9643	13.1629	13.0339	12.7587	13.061	12.7391	13.2739	13.0498	12.713	13.0155	13.1293	13.5794	12.9908	13.4995	13.4205	13.3248	13.093	12.3969	13.1694	12.713	13.0136	12.5568	12.7374	12.9487	12.7986	13.1946	13.2934	13.0865	12.4664	12.9026	12.7978	13.4059	12.8233	12.9102	12.9289	13.0761	12.667	12.8758	13.063	12.8491	13.5516	13.1967	13.2702	12.7488	13.3122
CCNDBP1	12.8528	12.967	12.6167	12.6556	12.6287	12.7651	12.6798	12.967	12.8038	12.9191	12.7953	13.1629	13.0012	12.6063	12.7424	12.6524	12.8953	12.7651	12.8319	12.8902	12.6572	12.9834	12.6832	12.5461	12.9543	13.1057	12.7505	12.6865	12.7803	13.0216	12.9615	12.9262	12.7424	12.7272	12.8793	12.9354	13.0865	13.0175	12.7872	13.2739	12.713	13.1371	12.9634	13.2883	13.6138	13.067	13.1225	12.9992	13.418
ARHGAP9	13.3147	13.4059	13.1178	12.9771	13.0521	12.7163	12.8473	13.1854	12.8653	13.182	13.0012	13.2192	13.1923	12.8829	13.0095	12.5918	12.9102	12.4748	12.827	13.2192	13.0195	13.2508	12.881	12.9919	13.1457	13.1118	12.7986	12.6832	13.0761	12.993	12.9561	13.067	13.4128	13.3074	13.3097	13.1878	13.281	13.5652	12.9289	13.2577	13.2622	13.698	12.7196	13.1118	13.2577	12.9335	13.3074	13.1199	13.0498
C14orf156	13.0821	13.0075	12.9652	12.9793	13.063	13.1332	12.9392	12.6703	12.9335	12.9812	12.8473	13.4153	12.9083	13.0521	12.9411	13.1351	12.8988	13.2052	12.9579	12.9175	13.167	12.9714	12.8509	12.3363	12.9252	13.2664	12.987	12.7081	13.0317	13.0278	13.1293	13.2508	13.0739	13.0298	12.8902	13.0821	13.3097	13.0952	13.3522	13.201	12.8251	13.2542	13.1714	12.797	12.4339	12.8579	12.7749	13.2909	13.0363
EIF3M	13.1446	13.3395	13.2739	13.1014	13.1088	13.1946	12.9065	13.3572	12.989	13.4257	13.0175	12.6832	13.3002	13.1247	13.1342	12.8109	13.3876	13.1413	13.1351	13.1694	13.3367	13.0889	13.093	13.0339	13.0974	12.9812	13.2029	13.0588	13.2739	12.8073	12.8457	13.1786	13.6108	13.0718	12.8758	12.9579	12.6784	13.2622	13.4544	12.8125	13.2883	13.2909	12.9119	12.8953	12.9771	13.2097	13.3723	13.2463	13.3982
LAMP1	13.0095	13.2339	13.1479	13.0136	13.3546	13.4789	13.3674	13.1501	13.201	13.3052	13.236	13.3122	13.1118	13.1563	13.0963	13.2052	13.0339	13.1435	13.0175	13.1138	12.9373	12.7324	13.1371	13.0317	12.9191	12.8347	13.1501	12.9992	13.0195	13.0136	13.0651	13.1901	13.0258	13.2739	13.3297	13.3074	12.8404	13.3248	13.0401	13.1519	13.0841	13.1808	13.1808	12.7539	13.0974	12.7765	13.0195	12.993	13.241
ALDH9A1	13.1079	12.9427	12.8902	13.1079	13.1332	12.5825	12.6588	12.8708	12.6104	12.8776	13.1178	13.0651	12.7081	12.7953	12.6493	12.4149	12.4424	12.914	12.4982	12.5722	13.0651	12.6242	12.8109	12.5722	12.6432	13.1036	12.4896	12.928	12.8961	12.3387	12.7163	13.3002	12.7953	13.1098	13.253	12.5568	12.6768	13.1312	13.061	13.2437	13.2484	12.8562	13.3122	13.3446	12.6334	13.3419	13.3699	13.4653	13.5292
CKLF	13.1293	13.1293	12.8579	12.8457	12.881	12.8233	12.7827	12.5377	13.1878	13.1079	12.967	13.4628	12.9561	12.8491	13.0588	12.7338	12.7212	12.8953	12.782	13.0439	12.7784	12.747	12.6541	12.0568	12.8002	12.7305	12.5664	12.7626	12.9191	13.2192	13.0479	13.3273	13.1986	12.8902	13.1199	13.0718	13.1457	13.1832	13.1735	12.9527	13.061	13.1312	13.0739	13.0588	13.3052	13.0237	13.2599	12.9298	13.5402
CNBP	13.241	13.2689	12.8848	13.0175	12.6597	12.9242	12.8634	13.1735	13.0781	13.1138	12.7872	13.1371	13.2896	12.8596	13.3194	13.1714	13.3594	13.0421	12.9175	13.2643	12.5625	13.5064	12.8226	13.0865	13.1519	13.2599	12.9262	12.7587	13.2192	13.0651	13.4789	13.0498	13.4653	12.7855	13.081	13.1351	13.6021	13.2384	12.9752	13.1946	13.2957	13.814	12.6784	13.0739	13.075	12.9598	13.0907	12.9102	13.1199
NDUFA3	13.1247	13.1986	13.3953	13.2291	13.3594	13.0459	13.1118	12.5305	13.0175	13.2192	12.9969	13.0339	13.1014	13.2976	13.3074	13.2763	13.0175	13.1457	12.8528	13.0401	13.1014	12.7531	13.1351	13.0032	12.8579	12.897	12.7424	13.1057	13.0055	12.8953	13.1901	12.9561	13.281	13.3319	13.2726	13.1649	13.4338	13.0588	13.3297	12.8883	13.0075	12.8055	13.1763	13.0439	13.0401	13.5345	13.2052	13.182	12.9083
IL10RB	12.6832	12.5492	12.3835	12.8741	13.0576	12.5918	12.7905	12.6524	12.4409	12.4522	12.6752	13.224	12.9102	12.1551	12.5363	12.6382	12.3505	12.6159	12.4062	12.2024	12.9175	12.0344	12.9044	12.3121	11.9161	12.1943	12.5778	12.3109	12.4636	12.7148	12.3822	13.6503	12.9392	13.0136	12.7803	12.9734	12.9316	12.9908	12.8689	13.3273	12.5918	12.844	13.3052	13.0718	13.0155	13.2214	13.5373	12.989	13.6458
PRDX6	12.9734	12.8038	12.7765	13.2463	12.6072	12.9411	12.7505	12.9447	12.8829	12.9392	13.1057	13.1014	12.814	12.7986	12.987	12.814	12.8021	12.8404	13.0889	12.9852	12.5583	12.5961	12.4537	12.104	12.4678	12.7667	12.6088	12.369	12.7953	12.8918	12.8092	12.5347	12.9752	13.1501	13.2052	13.1714	12.8596	13.2934	12.9714	13.3473	13.0439	12.7617	12.4808	13.6473	13.0339	12.9373	13.2577	13.3473	12.6703
IFITM3	11.3868	12.6849	11.9689	11.8303	11.2181	11.3686	12.4735	12.3223	13.4653	10.7796	13.698	13.6537	12.5432	11.9346	11.988	13.7777	13.7412	13.8897	11.9366	11.5694	12.4823	12.3611	13.6503	11.588	12.8233	11.4261	11.8798	13.0195	11.2816	12.6242	14.1753	13.0718	11.5378	12.1064	12.3452	13.4572	14.7574	12.3425	10.7724	13.2763	11.6838	11.565	14.2227	12.1155	13.241	13.2437	12.2785	12.747	13.5234
ACTR3	13.2859	12.6334	12.2404	12.8491	12.7505	12.3288	12.349	12.488	12.692	12.8708	12.5817	12.8544	13.2214	12.3728	12.6317	12.5476	12.7187	12.5931	12.1943	12.6214	12.3134	12.6654	12.2822	12.3611	12.5121	12.9102	12.0886	12.213	12.6736	12.6621	12.6447	13.2314	13.2554	12.7651	12.8125	12.6072	12.9102	13.3814	13.0841	13.3546	13.1435	13.3723	12.8935	13.4845	12.7505	13.3771	13.0449	13.3194	13.5993
NOL7	12.9298	13.1371	13.4845	13.1694	13.167	13.5709	13.7479	13.46	13.1967	13.3273	13.0781	12.9634	12.9579	13.1629	13.3953	13.0195	13.5009	13.3052	13.3723	13.2739	13.5766	13.0032	13.4308	12.987	13.3982	13.281	13.3953	13.3367	13.0216	13.1714	13.2643	13.3876	12.967	13.1332	13.4366	12.8616	13.2097	12.782	13.46	12.6272	13.1098	12.4268	13.4789	13.1079	12.8473	13.0718	13.0032	13.3929	12.8689
UBE2E1	13.1394	13.1225	12.7441	12.987	12.9643	12.9354	12.792	13.0521	13.0421	12.993	12.565	13.2121	13.236	12.7524	12.9373	12.6556	12.9262	13.0278	12.5363	12.8708	13.0258	12.9949	12.9634	12.7338	12.7872	13.0565	12.7272	12.9427	13.1735	13.0117	12.8883	13.1118	13.2714	12.9092	12.9615	13.0421	12.987	13.3097	13.1014	13.2689	13.1986	13.2643	12.9083	13.0401	12.5263	12.8339	13.0974	13.0439	13.2097
MAT2B	13.4282	12.8579	12.6813	13.201	13.2314	12.1631	12.1378	12.5318	12.5291	12.8355	12.6151	12.8304	12.8109	11.9825	12.2525	12.1283	12.2655	12.3996	11.9398	12.394	12.2754	12.472	11.9346	12.0906	12.488	12.8371	11.9576	12.3611	12.6317	12.4295	12.5617	13.0439	13.1199	12.9634	12.692	12.6478	12.7441	13.253	13.1312	13.4153	13.3122	13.2437	12.7539	13.322	12.9634	13.3273	13.3273	13.4762	13.3901
CNDP2	13.0995	13.0401	12.7179	13.167	12.9561	12.8288	12.5839	12.8092	12.4784	12.8371	12.6703	12.7765	12.6703	12.2307	12.5976	12.7572	12.9316	13.0106	12.6135	12.2282	12.7587	12.4792	12.1619	12.4008	12.7357	12.6621	12.6798	12.2271	12.9044	12.2846	12.8616	13.4641	13.0216	12.9411	13.0588	13.0952	12.827	13.167	12.9226	13.1694	12.8902	12.9157	13.1225	13.549	12.8171	13.2291	13.2076	12.8935	13.4231
PTTG1IP	12.8073	12.4908	12.5049	12.9487	12.7684	12.782	12.5177	12.9373	12.5278	12.565	12.9007	13.0268	12.6287	12.4226	12.6242	12.9316	12.9771	13.0155	12.7338	12.6628	12.5722	12.713	12.7488	12.2874	12.4762	12.4565	12.7702	12.6118	12.8562	12.6478	12.5022	13.1332	12.8858	12.7179	13.063	12.9335	12.485	12.897	12.7399	13.3876	12.8829	12.9579	12.9505	12.8055	12.9714	13.0317	13.1714	13.0382	13.1923
RAB7A	13.1057	13.0095	12.5553	13.061	12.8616	12.7179	12.6621	12.9191	12.9007	13.0588	12.7032	13.1923	13.2484	12.667	12.9598	12.8339	12.8935	12.9812	12.6364	12.8953	12.7272	12.5707	12.4924	12.3783	12.6038	12.501	12.5248	12.4792	12.9208	12.9191	12.9373	12.792	13.2384	13.1519	13.0545	12.987	12.6302	13.2763	12.7288	13.2029	13.2314	12.9083	12.7424	13.4007	13.0247	12.9752	13.1878	12.7749	13.4338
TUG1	13.3674	13.063	13.2883	13.3074	12.9579	13.1014	13.1271	13.2664	13.1704	13.2508	12.5318	13.0237	13.4544	13.0117	13.0565	12.8902	13.2268	12.8204	12.9852	13.0841	12.7667	13.2192	12.7765	13.5119	13.3801	13.5178	13.201	13.0459	13.1293	13.1585	13.0565	12.8339	12.8883	13.0278	13.2192	12.9714	12.5536	12.8883	13.1247	13.1371	13.4789	12.987	12.9065	12.8927	12.9852	12.7835	12.7718	13.1714	12.826
BRI3	12.5177	13.1332	12.6971	12.6588	12.9694	13.093	12.9102	12.4023	12.6768	12.5476	12.897	13.3395	12.7835	12.9026	13.2437	13.3674	13.1178	13.0781	13.241	13.1606	13.3801	13.0545	13.2859	12.4492	12.7088	12.5233	12.7855	13.1606	13.1118	13.3473	13.1735	13.261	12.8596	12.6798	13.1967	13.3446	13.5319	13.0055	12.7684	13.0055	12.4173	13.224	12.8204	12.7872	12.7225	12.485	13.0588	12.4908	12.6541
ATP1B3	13.2097	13.2833	12.7062	12.6654	13.0339	12.472	12.7734	12.9427	12.7734	12.7651	12.7702	13.1786	12.9373	12.8319	12.914	13.0459	12.9468	13.2554	12.8371	12.8021	13.0952	13.1247	12.7835	12.8002	12.7225	12.9392	13.2076	12.7424	13.0995	12.797	12.8188	13.1098	13.1808	12.9714	12.6736	13.1786	13.3522	13.1332	12.9543	13.0718	12.9373	13.1057	13.241	13.0865	12.9411	13.2029	13.2833	13.0258	13.2976
TNFSF13B	12.7114	12.8902	12.519	12.7667	12.9812	12.7539	12.6686	12.4838	13.0278	12.4693	12.2896	13.1312	12.4367	12.3783	12.4226	13.2145	13.2029	12.8055	12.7835	12.7241	12.8544	12.1052	12.7047	11.7079	12.4644	11.871	12.4479	12.2697	12.8829	12.3769	12.7718	13.1394	12.6214	12.6556	12.602	13.1158	13.8965	13.1199	12.6088	13.167	12.3822	13.2508	12.867	12.9191	12.9834	12.8848	13.4231	12.7338	13.2957
NDUFS5	13.2076	13.2664	13.4653	13.1457	12.8868	13.2622	13.2664	13.1986	13.1435	13.3147	13.3367	13.1247	13.093	13.6881	13.3982	13.0693	13.2689	13.3147	13.3147	13.4391	13.3522	13.1351	13.3852	12.9752	13.1036	13.1539	13.1694	13.2689	13.3723	13.4034	13.3395	12.9354	13.224	12.9652	13.1403	13.2909	13.0258	13.0459	13.6943	12.7587	13.3497	12.4939	13.1501	12.8509	12.6541	13.2314	12.9007	13.0317	13.3002
TXN	12.6703	12.8219	12.8918	12.993	12.8793	13.1413	12.8156	12.6541	12.9157	12.9427	13.0065	13.418	12.8425	13.1158	13.0055	12.8371	12.7424	12.9226	13.0521	12.8725	12.8829	12.8509	12.8653	12.2908	12.6541	13.236	13.0258	12.9527	12.8038	13.281	13.2339	12.8509	12.7305	12.9119	13.1539	12.9752	13.0216	12.9447	13.0588	12.8388	12.993	12.9065	12.9861	13.2268	13.4295	12.9447	12.8689	13.0693	13.4679
ATP6V1B2	12.713	12.7374	12.0282	12.6938	12.8758	12.0419	12.1322	12.4275	12.2452	12.217	11.9628	12.8634	12.6118	11.5675	11.7391	12.0155	12.0505	12.0468	12.0789	11.974	11.8876	11.8914	12.0833	11.9356	12.0012	11.8798	12.3861	11.5958	12.0089	12.1729	11.7498	13.0739	12.6556	12.6118	12.6182	12.881	12.599	13.1501	13.1079	14.1875	12.9335	12.9694	12.4149	13.5373	12.7872	13.0565	13.493	12.9714	13.7581
ARL16	13.1585	12.987	12.7986	12.9354	13.0258	12.8689	13.0907	13.1714	13.2463	13.0889	13.224	12.4241	12.8634	13.5234	13.2214	13.3723	13.5178	13.1901	13.5373	12.9615	13.5146	12.9175	13.3801	14.2836	13.8089	12.6197	13.4034	13.3771	13.7875	12.6605	12.6151	13.5597	13.0075	12.867	12.488	12.9392	12.8388	12.501	13.0382	13.3839	12.8868	12.8953	13.7581	12.4149	12.495	12.5347	11.8976	13.224	11.6553
WAC	13.1225	13.236	12.9427	13.0889	12.9487	12.928	12.9373	12.9157	12.9634	12.8449	12.349	12.7667	13.0498	12.9579	12.9992	13.0761	13.1259	13.0799	13.0363	13.0117	13.1694	13.4034	13.201	13.1128	12.8388	13.4628	13.0339	13.1036	13.0521	13.2029	13.1786	12.9487	13.241	12.928	13.1854	12.8339	13.1539	13.0339	12.9579	13.0155	13.0799	13.3546	13.0216	13.1394	12.9543	12.6347	12.792	13.1606	12.9969
CSTB	12.6088	12.9298	12.5419	12.6182	12.9044	12.5931	12.8616	12.4062	13.1158	12.4062	12.881	12.7288	12.9714	12.4137	12.8038	12.9543	12.9793	13.1946	12.8125	12.8616	13.0012	12.6686	12.867	12.1167	12.9026	11.9936	12.5536	12.8653	12.9505	12.6798	13.1312	13.3929	13.1236	12.5634	12.8935	13.3699	13.0278	13.0237	12.8002	13.3674	12.5794	13.4128	13.3982	13.061	12.827	13.093	12.6798	12.9908	13.2192
DBI	13.0952	13.1563	13.1585	13.1293	13.2664	13.1832	12.9505	12.9102	13.0889	13.0382	13.2577	13.2463	12.9065	13.0651	12.9543	13.0781	12.7684	12.9793	12.8802	12.9316	13.2789	12.7684	12.8596	12.6718	12.9316	13.241	13.0382	12.9634	12.9527	12.7357	13.1714	13.1271	13.1098	13.3147	13.1694	13.0865	13.1694	13.0545	13.5824	13.0459	12.9992	13.0317	13.2214	12.8171	12.7734	13.1394	12.8758	13.1057	13.201
LDHA	12.989	13.0841	12.5825	12.7374	12.3452	12.7784	13.0363	13.0974	13.1014	12.9354	12.8848	13.2437	12.9262	13.0599	13.2739	13.2121	13.3699	13.2957	13.3097	13.3594	13.0363	13.4338	13.1158	12.9487	13.2214	13.6021	13.1595	12.8758	13.1946	13.3028	13.4845	12.713	13.5319	12.7953	12.7936	13.3273	13.6444	13.3497	12.5722	13.3097	13.0117	13.6849	12.5263	12.6493	12.5887	12.8204	12.7272	12.5506	12.989
MRPS6	13.3074	13.1585	13.1606	13.3699	13.1901	12.5492	12.6572	12.7524	12.3678	13.0651	13.0995	13.2169	13.2577	12.8473	12.5233	12.5219	12.4212	12.4367	12.4808	12.7081	12.867	12.7587	12.2984	12.3376	12.6127	13.093	12.3572	12.6228	12.8288	12.7003	12.6813	13.224	13.2599	13.1539	13.4338	12.844	12.9335	13.1694	13.4282	13.1014	13.3248	13.241	13.0651	12.9354	12.9065	13.2121	13.1312	13.1735	13.4366
SEMA4D	12.8868	13.1138	13.2052	13.0693	13.3097	12.4823	13.0498	13.0278	12.7212	13.1351	13.0718	12.9191	13.1036	12.4449	12.6865	12.5163	12.644	12.8388	12.7241	12.4295	12.7455	13.0401	12.782	12.9044	12.6151	13.1312	12.9083	12.8339	12.797	12.8188	12.8784	12.9543	12.7765	13.0498	12.7587	13.0761	13.3319	12.9411	13.0339	13.0175	13.0237	12.9852	13.0718	13.2384	12.7684	12.9561	13.2508	13.0136	12.7441
HSPA1A	12.7424	11.7044	11.4902	12.5903	12.9427	11.0297	11.2864	11.0532	11.052	11.1795	11.8318	11.8441	12.365	10.951	10.782	10.7852	10.748	10.6698	10.5559	10.5058	10.5387	10.7629	10.6415	10.0192	10.4673	10.8166	10.4488	10.8282	11.3022	10.8172	11.4118	13.8005	12.7374	12.6901	12.7835	11.7755	13.0382	13.0382	12.6417	14.0626	12.4212	12.8509	12.1729	14.3193	13.0382	13.2789	13.9915	13.4205	13.911
POMP	12.9007	12.9949	12.7241	12.5825	12.7986	12.9615	13.0952	12.7424	12.7936	12.6798	12.5561	13.0588	12.9543	13.0693	13.2121	13.3147	13.0821	13.2463	12.9969	13.1036	13.2097	13.3953	12.9852	12.8339	12.9055	13.5292	12.9447	12.8579	12.8171	13.2554	13.1878	12.7524	12.8528	12.5976	13.0055	13.1901	13.5794	12.8021	13.1435	13.063	12.7179	13.2859	12.9771	13.3395	12.8689	13.2339	12.8156	12.7626	13.2859
GLG1	13.2169	13.3346	13.493	13.1479	13.2934	13.0898	13.4231	13.2192	12.8848	13.3622	13.3074	12.8708	13.1413	12.9119	13.0175	13.1394	13.061	13.2076	13.063	13.0952	13.3122	12.9812	13.0889	13.1649	13.1878	13.0718	13.1595	13.2484	13.1394	12.8634	12.7407	13.3122	13.0117	12.9092	13.1057	13.0237	12.4838	13.0206	13.2097	12.8725	13.1775	12.4838	13.3297	12.8109	12.8776	13.0865	12.6988	13.2437	13.2291
SEC11A	12.8758	13.1714	12.6347	12.9065	12.993	12.9157	12.987	13.0565	13.0545	13.0117	12.7554	13.3801	13.061	12.9262	13.1694	13.1901	13.2599	13.224	13.2291	12.9427	13.281	13.1036	13.0382	12.6885	12.9427	12.8156	12.9044	12.993	13.0907	13.061	13.1236	13.1694	13.0479	12.8868	13.2643	13.2437	12.9852	13.5939	13.0075	13.0841	13.0545	13.1854	12.9044	13.1714	12.602	12.9262	13.1098	12.8251	13.1808
NRGN	11.6326	11.9503	12.1332	13.3648	12.488	12.1426	12.2377	12.292	12.5022	12.3715	13.2339	11.6965	11.1101	12.7441	12.7651	12.9969	11.8388	12.5091	13.0651	12.6736	12.0452	11.7905	12.3183	11.2015	11.8954	11.7382	11.9761	12.149	12.394	12.0003	11.4223	11.5378	12.4226	13.1457	13.1832	13.1036	14.1835	13.0865	13.1394	13.6411	12.5583	13.4205	11.4126	13.167	13.3929	12.827	13.6167	14.113	11.0873
DUSP6	13.4902	13.281	12.9694	12.8233	12.4161	12.6214	13.3297	12.7702	14.0429	12.8319	12.6849	13.1501	12.6953	12.8902	13.4873	13.6202	13.3002	13.3622	11.8627	13.0278	12.4996	12.7757	13.0693	12.747	12.5752	12.3559	13.1118	12.6621	13.4295	12.3275	12.6556	12.9527	13.657	12.9743	12.8188	13.6849	13.0565	13.7676	12.8251	13.7875	13.1068	13.0258	12.9392	12.3849	13.3319	12.6832	13.0392	12.5406	12.8596
STX11	12.7441	12.9316	12.599	12.599	12.2565	12.7905	13.0237	13.2599	13.2484	12.7765	13.0821	13.9842	13.5939	13.4762	13.3852	13.5119	13.6602	13.2384	13.5626	13.4034	13.5319	13.4544	13.4845	12.8509	13.2169	13.2554	13.6235	13.1138	13.1014	13.3674	13.691	13.0995	13.063	12.8002	13.2145	13.6381	13.5851	12.9834	12.1954	12.8776	12.488	13.7353	12.8562	13.4308	13.4704	12.4198	12.6865	12.1064	12.9007
LOC647340	13.0479	13.224	13.0739	12.9102	12.8776	13.0237	12.8355	13.0216	13.0821	13.1878	13.1271	13.2763	13.0439	13.0479	13.0401	12.9694	12.9752	13.0439	12.9793	13.0761	13.1763	13.1178	12.797	12.7749	12.9411	13.2121	12.9157	12.8829	13.1574	13.0781	13.1332	12.8204	13.067	12.9949	12.9447	13.0032	13.1271	13.1967	13.4391	12.9598	13.1629	13.1649	12.827	12.9561	12.8002	13.1585	13.1014	13.1014	13.2052
RPS6KB2	12.9411	13.1808	13.3002	13.0781	13.3747	13.1606	13.3248	13.2883	13.0136	13.0317	13.5626	12.8339	12.4896	13.0421	13.1435	13.3273	13.063	13.1735	12.9714	13.1629	13.1225	12.8339	13.3446	13.2643	13.2086	12.8918	12.9026	13.1923	12.8388	13.0401	12.7505	13.1424	12.9316	13.5091	13.081	12.8579	12.3665	13.0012	13.1786	12.6382	12.9175	12.5121	13.236	12.9834	13.1351	13.5319	13.1735	13.0421	12.9262
DARS	13.0145	12.9969	13.3771	13.4007	13.2883	13.2739	13.167	13.1435	13.2789	13.2268	12.4939	12.8083	13.241	12.8544	12.8988	12.7702	13.2314	12.8741	12.8708	13.1519	12.9752	12.5839	12.9242	12.8848	13.2133	13.0401	12.989	12.7272	13.1519	13.0761	12.8562	12.8055	13.0401	13.3699	12.8404	13.0175	12.8371	12.8288	13.4887	12.519	13.3953	12.7179	13.093	12.5738	12.8883	12.9487	12.7784	13.1763	12.7212
SFRS9	13.1967	13.1178	13.0363	12.9044	12.9505	12.8092	12.9354	12.881	13.1901	13.1158	12.8918	13.1606	13.2437	12.9298	12.8021	12.8776	12.6182	12.9298	12.7749	12.9065	12.7196	12.9793	12.9119	12.9714	12.9083	13.3194	12.9298	12.8848	12.8883	13.1786	13.2508	13.0278	13.093	12.9543	13.1332	13.2859	13.0363	13.1539	12.9447	13.5319	13.0889	12.8404	13.0363	12.9026	12.6197	12.8073	12.9083	12.8596	13.0175
ARHGEF3	13.3122	13.0907	13.0012	13.2976	12.9007	12.8883	12.8404	13.1786	12.814	13.2484	13.0739	12.9447	13.1098	12.5679	12.2803	12.4381	12.6197	12.4437	12.3439	12.7017	12.4748	12.8741	12.4594	12.6478	12.9447	12.792	12.6382	12.7855	12.8319	12.9271	12.8319	12.651	12.9734	13.067	12.9044	12.7338	13.0952	12.9634	12.897	12.967	13.1808	13.1479	12.9007	12.9949	12.6054	12.9734	12.6118	12.9793	13.1394
NDUFB10	12.9852	12.993	13.322	13.0718	13.4205	13.3122	13.3147	13.1563	13.1138	13.0075	13.1371	12.7305	12.4924	12.8634	13.0841	13.1878	12.928	13.1694	12.9752	13.0718	13.1371	12.4187	13.1606	12.4996	12.9119	12.599	13.0821	13.0278	12.9289	12.7488	12.4748	13.5263	13.061	13.2577	12.9949	13.0479	12.5121	13.3419	13.0565	12.8579	12.8204	12.6334	13.1178	12.8188	13.0278	13.3747	13.4731	12.9226	13.4704
STK4	13.1036	13.1271	13.151	13.064	13.0781	13.0771	13.1138	13.0095	12.7855	13.1199	12.7855	12.3251	12.6784	12.7602	13.1057	13.0136	13.1501	12.9175	13.1118	13.1225	12.9242	12.9026	12.9026	12.9561	13.3699	12.7272	13.0032	13.1519	13.0075	12.7855	12.8741	12.9834	12.8544	13.0055	12.7684	12.8918	12.6287	12.9083	12.8883	12.9468	13.2508	12.6524	12.9908	12.8251	12.844	12.9083	12.7455	13.0012	12.9949
LOC644934	13.5402	14.3997	13.5345	13.0907	13.8392	13.4391	13.8496	13.814	11.8171	11.7632	13.9804	11.7158	13.2664	13.7006	13.7444	13.7875	14.1425	13.6758	13.578	11.8513	13.4391	14.0813	13.7006	13.6635	11.743	11.6001	12.9793	14.4177	14.2569	13.7139	13.2859	11.4861	14.0074	13.2664	13.4902	13.3522	11.8639	14.2007	14.0937	11.2174	13.4902	13.4418	13.4704	13.691	14.0281	11.9494	14.0472	13.8569	12.2428
LSM1	12.8793	12.8179	12.9615	12.9852	12.7407	13.0739	12.8988	12.7305	12.7017	12.7047	12.8233	13.1079	13.0136	12.8579	12.8156	12.8156	12.4748	12.8528	12.5233	12.8355	12.6417	12.914	12.827	12.6006	12.5738	13.3572	12.7338	12.6813	12.6849	13.0576	12.8304	12.8388	13.1271	12.8634	13.3028	12.9226	12.914	12.8371	13.1606	12.8509	13.1271	12.9119	13.1138	13.5458	13.1247	13.1519	13.0865	13.1629	13.2789
TAP1	13.0781	12.7331	12.7488	13.2622	13.2976	12.3728	12.5134	12.6258	12.6588	12.6334	12.8625	13.3002	12.7587	12.3742	12.121	12.5278	12.3822	12.6541	12.1669	12.222	12.4367	12.4241	12.292	12.3769	12.4479	12.7366	12.5945	12.3996	12.3275	12.2971	12.7667	13.1014	12.7734	13.0216	13.0155	12.7888	13.0401	13.1763	12.967	13.1585	12.9007	12.7148	13.0032	14.1299	12.7667	13.4704	13.1079	13.3901	13.6138
MORF4L1	13.1519	13.2097	12.9468	12.9834	12.6118	12.8109	12.6635	13.063	12.8988	13.2384	12.9447	12.9852	12.6621	13.0012	12.8902	12.9447	12.9083	12.9552	12.9262	13.0821	12.6524	12.8204	12.7241	12.4908	12.6971	12.867	13.0216	12.914	12.9969	12.9834	12.993	12.8288	13.201	12.8388	12.8371	12.8883	12.7667	13.1057	13.0479	13.241	13.3674	13.0739	12.6088	12.9908	13.0136	12.9969	12.9316	12.8509	13.2763
CCND2	13.657	13.0012	13.0055	13.2859	13.1808	12.9752	12.9579	12.987	13.1763	13.1479	12.987	13.3473	13.2934	12.8509	13.1714	12.8404	12.814	12.792	13.1808	12.897	12.9694	13.673	12.7163	13.0439	13.0237	13.6326	12.9373	13.0781	12.9561	13.0075	13.3446	12.9298	13.3367	13.0155	13.3002	12.967	13.0421	13.2029	12.9793	12.7488	13.657	13.5458	12.8725	13.5064	12.7718	13.063	12.5679	13.0974	13.3723
SRRM2	13.0865	12.8562	13.224	12.9527	13.0498	13.1854	12.9007	12.9812	13.1946	13.0952	12.9598	13.2214	13.3648	13.3172	13.067	13.2437	13.2643	13.0382	13.3074	13.0889	13.0278	13.72	13.0298	13.8605	13.3723	13.717	13.3367	13.1967	13.236	13.4704	13.3273	12.8562	12.8164	12.8251	12.9157	13.1595	12.9992	12.7455	12.9634	12.747	13.0865	13.4007	12.6798	13.1057	12.6605	12.5839	12.6287	12.7667	12.3169
SS18L2	13.1735	13.1923	12.9298	12.9175	12.8544	13.1199	12.9262	12.8616	13.1923	13.1293	13.0761	13.2664	13.2384	13.0363	13.253	12.9752	13.1946	13.1923	13.1371	13.2833	13.1247	13.1629	12.9298	13.0739	13.2689	13.4704	12.7488	13.0693	13.0401	13.0258	13.0718	13.0693	13.0136	12.8988	13.1563	13.1946	13.2599	12.9119	13.0799	12.9734	13.0995	12.9752	13.0821	12.9496	12.6635	12.9543	12.9561	13.1649	12.993
SNRPG	13.1108	12.9793	12.7718	12.6038	12.7324	13.0195	12.9606	12.602	13.1036	12.8848	12.747	13.0521	12.9992	13.1025	13.0278	13.0117	12.9392	13.1138	12.8288	13.1479	13.0317	13.0693	12.8021	12.9316	12.9752	13.6051	12.9191	12.9044	12.8634	12.9598	12.989	12.8741	13.1178	12.5778	12.7407	12.8758	13.0055	12.987	12.9411	12.9191	12.9969	13.1394	13.0382	12.9852	12.7855	13.1479	12.8171	13.0995	13.2169
MGC10997	12.9561	13.0498	13.241	13.4495	13.0545	12.8829	12.9834	12.7667	13.0032	12.8425	13.063	12.9468	12.8509	12.844	12.897	12.565	12.8038	12.6901	12.7524	12.9411	13.0831	12.8918	12.9316	12.9969	13.0739	12.8708	13.1832	12.9714	13.061	13.0095	12.9992	12.9392	12.6287	13.1563	12.8109	12.8388	12.5918	12.7667	13.1351	12.7635	13.0907	12.4924	13.1394	13.2976	12.9652	13.1786	13.0278	13.067	12.701
FERMT3	12.4601	12.6988	12.5887	13.0479	12.6953	12.8616	12.6736	12.5347	12.8404	12.651	12.7305	12.9208	12.5049	12.6635	12.8528	12.7524	12.4792	12.8689	12.4755	12.6938	12.5076	12.5825	12.2773	12.3387	12.3546	12.5022	12.181	12.3313	12.5134	12.565	12.302	12.6572	12.6971	12.988	13.0317	12.8793	13.0498	12.8579	12.7803	13.1832	12.4651	13.4628	12.6151	13.1025	12.7651	12.8055	13.1832	13.1178	12.6382
Selenoprotein 15	12.9714	13.0865	12.4982	12.7505	12.844	12.8371	12.6938	12.7749	13.0055	12.967	12.5163	13.0268	13.1714	12.6686	12.7986	12.7936	13.0075	12.9694	12.6347	12.9505	12.6242	13.0421	12.6104	12.4479	12.8758	13.0545	12.3954	12.7602	13.0012	13.0175	13.1457	12.844	13.4718	12.6621	12.9316	13.0095	13.2554	13.3473	12.9208	13.2934	13.0693	13.5652	12.6334	12.9496	12.4008	12.8404	12.8109	12.7212	13.0195
FOXO3	12.7357	12.914	12.5839	12.8204	12.6167	12.5363	12.8425	13.0781	13.2214	12.8388	12.6798	13.063	13.3941	13.0865	13.0136	13.1479	12.9298	12.7288	13.0565	13.0032	12.8404	13.4059	13.0907	13.2192	12.9208	12.9793	13.5292	12.8988	13.063	12.8848	12.4866	12.5583	12.3439	12.8219	12.7391	12.8868	12.6006	12.5318	12.5305	12.651	12.7702	12.3458	12.4728	12.7163	14.4358	12.2271	12.6694	12.2233	12.4707
GTF3A	13.2052	13.3194	13.3346	13.2192	12.9316	13.2052	12.9812	13.2097	13.2739	13.1057	13.0459	13.3074	13.3367	13.3367	13.2291	12.8473	13.1808	13.2121	13.0718	13.4231	13.236	13.4282	12.9969	13.1854	13.0317	13.7266	13.0075	13.1563	13.3395	13.3074	13.2909	12.6703	13.7353	13.1479	13.3147	13.1763	13.72	13.1457	13.2169	12.8473	13.3622	13.7581	12.6865	12.792	12.8156	13.0075	12.9652	13.2145	12.8109
SRP14P1	13.1138	13.1158	13.2484	12.8935	12.9208	12.9083	13.1057	12.993	13.3346	13.2833	13.1694	13.0075	13.0739	13.4205	13.1786	12.8653	13.1763	13.3473	13.1649	13.241	13.063	12.844	12.9752	13.1057	13.1735	13.1014	12.9579	13.3028	13.0889	13.0799	13.2121	12.9992	13.2097	12.9852	13.093	13.2883	12.9044	12.9812	12.9427	12.6718	13.1501	12.8109	13.1649	12.9226	12.9992	13.1986	12.9335	13.1225	13.2076
YBX1	12.9427	13.0032	13.1457	12.7539	12.6242	12.9298	12.897	12.9793	13.1293	13.1649	13.0237	12.64	12.6151	13.1694	13.1014	13.1763	13.0693	13.2714	13.1519	13.1413	13.2909	12.6885	12.9392	12.9634	13.0718	12.6784	12.8038	13.2291	12.9175	12.7667	12.7936	13.0075	12.993	12.8204	12.8725	13.1413	12.897	13.0651	13.0865	12.64	13.0479	12.9208	13.3622	12.4309	13.3594	13.1057	12.9191	13.0952	13.1118
LOC23117	12.8233	12.6006	12.9411	13.0317	13.1529	12.9505	13.093	13.3648	12.967	12.4762	12.9834	12.7212	12.9598	13.2909	12.9969	13.4954	13.4282	13.2169	13.6602	13.0739	13.3147	13.6326	13.3723	14.4851	13.8316	13.0382	13.691	13.3648	13.7266	12.9119	12.987	12.6302	12.4268	13.063	12.4008	12.7617	12.7241	12.323	13.3674	13.1735	12.4449	12.5694	13.3446	12.2276	12.1086	12.1024	12.0886	13.1435	11.5545
HEXB	12.9102	12.8988	12.6447	12.8544	12.9119	12.8902	12.8092	12.8021	13.2643	12.8304	12.6885	13.1694	13.2859	12.9561	13.0298	13.1271	12.9157	12.7872	12.9044	12.9242	12.7905	12.7288	12.8918	12.4762	12.8725	12.6088	12.9392	12.6901	13.0651	12.9634	13.1832	12.9157	12.8776	12.8776	13.2957	13.2254	13.2976	13.2169	12.9026	13.2291	13.0278	13.1138	12.4187	12.967	12.7096	12.5377	13.0821	12.5134	13.0952
CNN2	12.8092	12.7855	13.0693	13.0401	13.1118	13.0268	12.9208	13.3097	13.2577	13.0718	13.0693	12.5752	13.0339	13.0781	13.2934	12.9634	13.1199	13.1057	13.2664	13.3002	12.9634	13.0216	13.1014	13.2484	13.2268	13.1457	12.9478	13.3446	13.1501	12.4131	13.061	12.9812	12.8288	12.9427	12.5857	12.5219	12.2452	12.0715	12.8188	12.7936	12.7651	12.8935	13.2192	12.9793	13.4391	13.3172	12.844	13.322	13.0317
RPS27L	12.6752	12.8653	12.6865	12.6463	12.6364	12.6813	12.5022	12.4579	12.7424	12.827	12.7407	13.322	13.0032	12.7718	12.6447	12.6167	12.792	12.9714	12.64	12.6885	12.713	12.6832	12.4896	12.1378	12.7651	13.2169	12.3412	12.6768	12.7765	12.814	13.2622	12.7163	12.844	12.6875	12.7003	12.8233	13.1332	13.1519	13.2859	13.0521	13.1158	13.2976	12.993	13.1351	12.3728	13.236	12.8233	13.1312	13.1649
FAM50A	13.0459	12.8868	13.1413	13.1854	13.281	13.3648	13.061	13.0136	12.7179	12.8653	13.2029	12.7179	12.7357	12.6588	12.7305	12.9208	12.7114	12.9411	12.9157	13.0075	13.1967	12.7148	13.2214	12.9242	12.8868	12.6524	12.8101	13.1098	12.7488	12.9271	12.7488	13.0237	12.881	13.3194	13.1946	12.9007	12.6988	12.8204	13.149	12.7835	12.8457	12.565	13.4902	13.1225	13.1014	13.3982	13.6296	13.0459	13.1178
C19orf56	12.9812	13.0545	12.9447	13.1312	13.1735	13.0545	13.1977	13.0498	12.7835	12.9505	13.1808	12.9652	12.9119	12.8171	12.9083	13.0401	12.9373	13.0216	12.9026	12.9992	13.1901	12.7953	13.0421	12.7905	13.0918	12.7855	12.8371	12.7888	12.881	12.8616	12.8404	13.0401	12.9771	13.2291	13.1403	13.0075	12.8204	13.0401	12.8935	12.9007	12.8296	13.0781	12.9992	12.9044	12.9579	13.0459	12.9714	12.8355	12.9752
DAD1	12.9271	12.9044	13.1158	12.9392	12.814	12.9652	12.6072	12.5694	12.928	13.1225	13.0216	13.0907	12.8918	13.0459	12.7256	12.8988	12.5492	12.8219	12.8935	13.0421	12.5553	12.6621	12.6054	12.5634	12.7913	12.7179	12.5177	13.0545	12.6865	12.9908	12.9007	12.9734	12.8653	12.9316	13.1585	12.9694	12.7718	12.9752	13.3052	12.7734	13.1036	12.7163	13.0065	13.2763	12.8425	13.322	12.9242	13.1271	13.0479
MKNK2	13.1178	13.3074	13.2957	12.9119	13.2599	12.9065	13.1036	13.1606	13.2934	13.1118	13.4257	13.0799	13.1694	13.4418	13.0821	13.0479	12.9634	12.9505	12.9298	13.1714	13.2145	13.3446	12.8204	13.4231	13.2086	13.0421	12.9527	13.0382	13.1606	13.1735	12.6752	12.8473	13.3419	13.1148	12.8465	12.9119	12.8339	13.2463	12.9852	12.7017	13.0521	12.7374	12.967	12.4623	13.2214	12.8544	12.8388	12.8918	12.3835
S100A11	12.3769	12.2996	12.4062	12.5617	12.8171	12.6938	12.8902	12.2294	12.7357	12.2109	12.9752	12.8132	12.1485	12.302	12.6849	13.1178	12.8388	12.9242	12.5825	12.5766	12.6447	12.0446	12.9065	11.7337	12.2619	11.4198	12.6235	12.1378	12.3875	12.5448	12.7062	13.2909	12.5983	12.6849	12.6556	12.7225	12.8319	12.5945	12.3902	12.993	12.1132	12.6865	13.061	12.5839	13.3194	12.9298	13.3747	12.6784	13.3319
PSME2	12.9652	13.0889	12.5657	12.9812	12.9543	12.6635	12.6182	12.7212	12.9065	12.8125	12.7505	13.5402	12.8296	12.8204	12.6752	13.1118	13.093	13.2883	12.6938	12.7357	12.987	12.4043	12.4522	12.56	12.8653	12.8414	12.8304	12.5177	12.56	12.7081	13.1946	12.8596	12.8425	12.8689	13.0032	13.201	13.1649	12.8918	12.7617	12.9652	12.8339	12.6635	13.1413	12.9615	12.7953	13.3522	12.8002	13.0055	13.2714
TSPAN32	13.1714	13.3522	13.4614	13.1923	13.2463	13.2192	12.5945	13.4034	12.9427	13.2133	13.1332	13.0459	12.7305	12.5448	12.8562	12.7734	12.3096	13.3771	12.7455	12.8388	13.1098	13.1714	13.4544	13.1901	12.8404	12.8414	13.1519	13.1457	12.7675	12.827	12.8579	12.3439	12.524	13.0995	13.4059	12.6258	12.6718	13.2577	12.9044	12.6478	13.2097	12.7986	13.2763	12.8883	12.4762	12.6849	12.9992	13.4282	12.8038
MGC4677	12.3703	12.5617	12.3412	12.967	12.5263	12.8935	12.5772	12.6865	12.3263	12.4437	13.2643	12.5583	12.4149	12.7572	12.9447	13.0382	12.3709	13.2437	12.989	13.4082	12.6463	12.5679	12.485	12.1267	13.0278	12.9615	12.8125	12.5707	12.5076	12.651	12.6364	12.4198	12.0035	13.0382	12.747	12.9487	12.881	12.3665	13.1519	13.4653	12.2874	12.5664	12.4579	13.1878	13.2291	13.2577	12.6478	13.3967	12.881
HEBP2	12.7749	13.0459	13.2169	13.1271	12.897	13.5597	13.5431	13.2157	12.9812	13.0055	13.0117	12.867	13.0055	13.1649	13.3747	12.6334	13.0974	12.8304	13.224	13.4128	13.2946	12.7488	13.5402	12.7986	13.1293	13.061	13.1735	13.1332	13.0421	13.1158	12.7702	13.0032	13.1585	13.2789	13.1735	12.8204	13.1832	13.063	12.8319	12.6686	12.7505	13.0565	12.5332	12.6463	13.1967	12.8868	13.0226	12.9949	13.061
SIRPA	12.3534	12.6486	12.3198	12.5536	12.7062	12.7855	12.6287	12.5778	12.8355	12.6258	12.6302	12.9527	12.3464	12.4087	12.8219	12.6214	12.6635	12.4996	12.2391	12.3479	12.6151	12.0136	12.7702	11.8522	12.4087	11.6703	12.2434	12.2931	12.9543	12.7187	12.1871	13.1312	13.3052	12.8355	12.814	13.3147	12.3572	13.1293	12.6953	13.281	12.6272	12.8902	12.501	13.1332	13.2029	12.3479	12.9505	12.4367	13.2883
FBL	13.3367	13.2145	13.8755	13.6411	13.5597	13.67	13.5516	13.5737	13.1629	13.5009	13.7006	12.7554	12.8868	13.2437	13.2833	13.0865	13.2463	13.3319	13.3002	13.2097	13.3194	12.9615	13.5292	13.1563	13.3052	13.2076	13.3771	13.3297	13.1079	12.9102	12.692	13.1225	13.1649	13.4653	13.1312	12.6564	12.4777	13.0206	13.7875	12.2565	13.2859	12.4908	13.3648	12.8038	12.881	13.253	13.061	13.149	12.9157
ICAM2	12.8596	12.5419	12.602	13.0821	13.1247	12.2507	12.3808	12.2874	12.4968	12.7936	13.0865	13.0889	13.0401	12.1908	12.2024	12.4594	12.4008	12.5332	12.4008	12.4198	12.4124	12.4594	12.0682	11.9914	12.1288	12.213	11.9981	11.7894	12.369	12.4466	12.8473	13.0195	12.7524	12.9468	12.8708	12.7256	13.2622	12.5738	13.2689	12.827	13.1413	12.9543	12.9468	13.0317	12.8579	13.4082	13.201	13.3419	12.8528
MFSD10	12.9908	12.7953	12.9316	13.1714	13.2076	13.5178	13.3473	13.4653	13.0865	12.9734	12.9527	12.9579	12.9752	13.0439	13.1967	13.0075	12.9226	12.8868	13.0421	12.9468	12.9908	13.1079	13.2268	13.1312	12.9335	13.1649	13.3852	12.9262	12.9908	12.9793	12.7749	12.7455	12.8073	13.1199	13.2169	12.8902	12.8109	12.9191	12.8725	12.7905	12.7855	12.4049	13.281	12.4823	12.7765	12.7488	12.8562	13.2268	12.9316
EPN1	12.7062	13.0565	12.7256	12.64	12.9949	12.7096	12.7391	12.9527	12.9447	12.6295	12.9579	12.8776	12.8092	12.8055	13.0032	13.2029	13.1098	13.1271	12.9505	13.1394	12.8758	12.9157	13.1036	12.9354	12.8935	12.5738	13.0012	12.6953	12.7835	12.9487	12.9634	12.7872	13.1563	13.1079	12.8596	12.9812	13.0889	12.928	12.6151	12.7718	12.5022	13.061	12.8848	12.8388	13.0075	12.987	12.9527	12.488	13.1413
C9orf78	13.0363	12.9908	13.253	12.9468	12.8829	13.1786	13.0459	13.1293	12.8544	13.1271	13.0382	12.6953	13.0907	12.9157	13.0258	12.9949	13.0382	13.0363	12.9992	12.967	12.9652	13.1585	13.2664	12.8319	12.7888	12.9694	12.7651	13.1749	13.1371	13.0693	13.0459	12.7572	13.0963	12.8404	12.8562	12.8848	12.782	12.8388	12.9102	12.517	12.9505	12.7272	12.8634	12.6524	14.1791	12.8251	12.7096	13.0907	12.7357
PLAC8	13.2689	12.8918	12.5149	12.4866	12.6038	12.3363	12.7241	12.2551	12.8616	12.8935	12.7003	13.3622	12.8355	12.6334	12.4073	12.9516	12.6564	12.599	12.2661	12.4968	12.8388	12.3742	12.0271	12.2835	12.2602	12.5634	11.997	12.6167	12.5492	12.9007	13.167	12.5664	12.9969	12.5049	12.993	13.3395	13.1247	13.224	12.891	13.3699	12.8776	12.9615	13.1036	12.7324	12.2495	13.1832	12.8219	12.7734	13.549
C12orf57	13.1413	13.2739	13.9184	13.4789	13.657	13.5091	13.5146	12.7635	12.9852	13.5939	14.2429	12.797	13.0216	13.5091	13.3395	12.8038	13.4653	13.4572	13.3929	13.6881	13.1539	13.1413	13.1138	13.2554	13.3395	13.2622	13.1901	13.6473	13.0799	13.0576	13.652	12.8776	13.3172	13.4379	13.0439	12.6597	13.2689	13.0479	13.9328	12.0724	13.5178	12.7524	13.3028	12.987	12.4492	13.4231	12.651	13.6051	12.7196
ATP5F1	12.9527	12.9615	12.5872	12.9447	12.6791	12.8544	12.7114	12.9242	12.8927	13.0421	12.501	13.0479	13.1585	12.7114	12.8371	12.7953	12.6885	12.8579	12.7148	12.8109	12.8596	12.7784	12.4282	12.4748	12.565	13.1199	12.7684	13.0106	12.7314	12.7635	12.9652	12.8125	12.9026	12.7062	12.9714	13.0565	12.9598	13.1394	13.1967	13.1118	13.1351	13.2622	12.7391	13.0136	12.6038	13.1606	13.067	12.8902	13.3648
C14orf153	12.7391	12.7196	12.797	12.2859	12.8927	12.6572	12.7488	13.1271	13.0258	12.7225	12.7047	12.8935	13.063	13.4104	13.0317	13.0521	13.4082	13.0075	13.1923	12.9262	13.2599	13.3876	13.0237	14.227	13.5036	13.1832	13.2622	13.241	13.5178	12.8579	12.7803	13.2714	13.1435	12.64	12.9392	12.7749	13.8105	12.3363	12.5233	13.2214	12.581	13.6785	13.418	12.608	12.2391	12.3559	11.8333	12.6621	11.3976
POLE4	12.7936	12.9083	12.967	13.0155	13.2254	13.1178	13.1501	12.9074	13.0363	12.8101	13.0095	13.1649	12.9208	13.0889	12.9271	13.0317	12.9561	12.8156	12.9226	13.1585	13.1435	12.7626	13.063	12.7032	12.9354	12.8858	12.8935	12.8388	12.8371	13.0237	12.9119	13.0521	12.9615	13.2052	13.0216	13.1118	13.0012	12.9793	13.2121	12.9083	12.827	13.1118	12.9949	12.8233	12.565	13.1178	13.2664	12.9487	13.0588
FAM40B	13.2192	12.5576	12.7088	12.588	13.0237	12.8304	13.0095	13.0317	13.0085	12.5707	12.8288	12.8725	12.8491	13.1351	12.6524	13.1247	13.2739	12.9208	13.0599	12.8457	13.4034	13.4495	13.2976	14.1835	13.5766	13.2643	13.4205	13.3052	13.5737	13.1967	13.0055	13.0095	12.5983	12.5825	12.8491	12.7455	12.8125	12.1255	12.6258	13.1178	12.5887	13.0401	13.4034	12.8776	12.7888	12.3057	12.5114	12.844	11.6883
PQLC1	12.5432	12.7587	12.7749	12.7602	12.9157	13.0771	12.9752	12.9615	12.9535	12.782	12.9157	13.0565	12.8473	12.9447	12.9354	12.8171	12.6995	12.9949	12.7651	12.9208	12.7148	13.0278	13.0363	12.8793	12.7003	12.7784	12.8953	12.8251	12.7675	13.1225	12.7391	12.9065	12.8927	12.8741	13.0075	12.8829	12.8156	12.8616	12.6063	12.8233	12.6823	12.6605	12.8404	12.9652	13.2664	12.7675	12.9812	12.6605	13.0382
CD7	13.6021	13.1057	13.6785	13.3953	13.8676	13.0995	13.6138	13.4873	12.9771	13.6411	13.6503	12.7441	13.3572	13.1763	13.2776	13.0363	12.8758	13.1293	13.1332	13.1351	13.3953	13.3052	13.2145	13.1714	13.1158	12.8046	13.1649	13.4628	13.0693	12.3875	13.1199	12.9007	13.3319	13.691	12.7305	12.4816	12.3611	13.2599	13.4366	11.9281	13.4628	12.6885	12.9026	12.827	13.2484	13.1351	13.3648	12.9734	12.8457
TACC1	12.8457	12.7986	12.6295	12.7338	12.7888	12.914	12.7288	12.7032	12.8073	12.5887	12.335	13.0216	13.1247	12.7081	12.9834	12.9579	12.7765	12.8425	12.9316	12.7855	12.9714	13.2833	12.9561	13.0588	12.9487	13.0761	13.2789	12.8509	12.9335	13.1479	13.0974	12.8156	12.5722	12.8371	12.9505	12.9183	12.8073	12.7986	12.7148	13.0693	12.8562	13.0095	12.8868	13.0974	12.8021	12.6317	12.8055	12.7718	13.1606
TAX1BP1	12.7455	12.7357	12.8509	12.8219	13.0651	13.0974	13.0995	12.8509	12.8579	12.9119	12.3376	12.7047	12.6971	12.8125	12.7749	12.9834	12.8156	13.0498	13.1629	12.9044	13.1457	12.8473	12.7017	12.6317	12.7572	12.9734	12.9949	13.1585	12.7256	13.1519	12.9714	12.8092	12.7441	12.9044	12.7241	12.5177	12.7572	12.7855	13.063	12.9298	12.9065	12.881	12.7179	12.9527	13.1158	12.8371	13.0498	12.8125	13.0258
CTDSP2	13.0117	12.8829	12.9752	13.1199	13.2739	12.7617	12.4241	12.8388	12.7305	12.9615	12.8188	12.8509	13.1563	12.3861	12.2859	12.0483	12.1539	12.2773	12.1966	12.3452	11.9074	12.3432	12.5062	12.4565	12.4137	12.6471	12.6302	12.5476	12.4537	12.6556	12.6088	13.1079	13.1332	13.1585	13.2214	12.9262	12.5752	13.067	12.875	13.1068	13.0739	12.9373	12.7288	13.0055	12.9468	12.9579	13.0545	13.0363	13.0545
NAGK	12.3842	12.3191	11.9525	12.7684	12.9793	12.0973	11.9303	12.1631	12.0024	12.0968	12.2036	12.6556	12.4838	11.7355	11.9398	12.2884	12.3198	12.3288	12.2785	12.2666	12.3703	11.7058	12.1244	11.915	12.2352	11.4157	11.5378	11.8076	12.0057	11.7783	12.3223	13.2268	12.0843	12.5522	12.1426	12.4354	13.1351	12.7765	12.4838	13.6818	12.0313	12.9191	11.87	12.8425	12.2404	12.9505	13.4128	13.2484	13.6184
HDAC1	13.2384	13.1967	13.3901	13.3929	13.4418	13.1098	13.1606	13.2508	13.1479	13.447	13.1199	12.7617	12.9852	12.8233	13.0216	12.5553	12.6006	12.814	12.8388	12.9191	12.6038	12.4437	13.0095	12.8021	12.9252	13.0216	13.0651	12.8562	12.7139	12.7554	12.3875	13.0421	13.1413	13.5234	13.0889	12.9634	12.281	13.0974	13.281	12.9316	13.4704	12.1858	13.1923	12.914	12.3914	13.1946	12.9624	13.241	13.1351
DNMT1	13.2566	13.0421	13.0155	13.236	13.0032	12.7835	13.1519	13.093	12.9714	13.1763	13.0421	12.8988	13.2643	12.4651	12.6813	12.658	12.713	12.7357	12.5016	12.7651	12.5707	12.6072	12.5461	12.7407	13.0258	13.5913	12.7587	12.9834	12.8689	12.8109	12.9447	12.8425	12.9793	13.0865	12.9026	12.7554	12.6865	12.9007	13.0117	12.8171	13.0761	12.7241	13.0588	13.1293	12.3412	12.8304	12.8125	13.2789	12.7256
CCM2	12.8544	12.4792	13.3367	13.0865	13.3572	13.0588	12.8528	12.8988	12.8528	12.7374	13.1574	12.844	12.9771	12.5536	12.519	12.5391	12.5839	12.7524	12.4939	12.5476	12.844	12.6541	12.7096	12.6953	12.6197	12.5377	12.5766	12.6382	12.4552	12.7288	12.7374	13.1585	12.7225	13.1036	13.2789	12.4112	12.4908	12.7225	12.9354	12.7212	12.8319	12.5391	13.5402	12.9579	12.9226	12.9615	13.1271	13.0821	12.8725
EIF4B	13.3395	13.2384	13.4366	12.8883	13.0095	13.0799	13.0278	13.1967	13.2763	13.7266	13.2314	12.7196	13.4257	13.2739	13.1271	12.9561	13.2052	13.0459	13.4059	13.3028	12.9392	13.3982	13.1479	13.6537	13.3622	13.673	13.1312	13.5824	13.1854	13.3594	13.3852	12.7651	13.2291	13.0439	13.1901	13.1479	13.1371	13.2789	13.2739	12.6347	13.5766	13.1606	12.7684	12.9468	12.7272	13.0095	12.8634	12.6635	12.9543
RGS18	12.8509	12.0136	11.4702	13.0298	11.6767	10.7947	11.1856	11.875	11.9695	12.1619	11.7507	11.6751	11.3122	12.2637	12.7455	13.0651	12.3889	12.3198	12.3498	12.9771	11.3813	11.9235	11.2174	10.7566	11.5333	11.1982	11.2655	11.9351	11.9181	12.0875	12.1009	11.9914	12.4137	12.7081	12.6635	12.602	12.8868	13.1271	12.5778	13.5206	12.6798	13.3522	10.6689	14.2698	13.2157	12.9714	12.9694	13.717	12.4594
GDI2	12.7784	12.9447	12.5076	12.8918	12.7272	12.6104	12.0896	12.914	12.7338	12.9834	12.8509	12.7256	12.9634	12.4537	12.7835	12.987	12.7288	12.967	12.8883	12.993	12.9427	12.9447	12.5738	12.8109	13.0363	12.6556	12.7305	12.6744	12.9652	13.2384	13.0095	12.8848	12.7455	12.6605	12.5872	12.6718	12.7734	13.201	13.149	13.2169	12.9208	13.1199	12.6228	12.8708	12.6151	13.0155	12.713	12.6228	13.2372
MRPL33	13.0799	13.093	13.0995	12.6493	12.7749	13.067	12.7635	12.5766	13.0298	13.0095	12.8055	12.8793	13.1351	13.0974	13.0339	12.8021	12.5976	12.844	12.8988	12.9543	12.9793	12.8988	12.7539	12.6151	12.9468	13.1371	12.6541	12.9543	12.9447	13.2643	13.1178	13.0339	13.1539	12.8339	13.1158	13.0739	12.8634	13.1435	13.0952	13.0095	12.8616	12.8698	12.9561	12.8319	12.4367	12.8021	12.7835	12.9468	13.0799
RNF149	12.7047	12.1461	11.7957	12.2931	12.4579	11.4311	11.5458	11.8562	12.0271	11.9281	12.1098	12.7888	12.485	11.4848	11.7062	12.1438	12.1356	11.8876	12.1098	12.025	11.8009	12.0155	11.7527	11.5233	11.7488	11.8571	11.9683	11.9585	12.059	11.87	12.3703	13.2145	12.2565	12.1681	12.0177	12.3439	12.7374	12.8156	12.1507	13.8073	12.6214	12.6849	12.309	13.5009	13.0195	13.3028	13.4628	12.8988	13.5373
U2AF2	12.9487	13.0317	12.9852	12.8848	12.9992	12.7272	12.8596	13.0799	12.8902	12.987	12.9694	13.0781	12.987	12.8758	12.814	12.9026	13.0401	12.8708	12.867	12.7374	12.989	13.0012	12.6605	13.1332	13.0012	13.1332	12.7602	12.8355	12.8355	13.0195	13.0439	12.989	13.0278	12.9487	12.9083	12.6832	12.8092	12.7357	12.7651	12.792	12.9298	12.9771	13.0298	12.9714	12.667	12.7986	12.9175	12.9598	12.9044
ARS2	12.9373	12.9392	13.1832	12.9949	13.1413	13.1901	13.2883	13.1629	13.1178	12.9714	12.9949	13.0012	13.1199	13.1178	13.2643	13.063	13.1854	12.8544	13.3594	13.1282	13.0155	13.2664	12.897	13.4323	13.2384	13.5993	13.2643	13.1629	13.0237	13.2437	13.0739	12.6493	13.0095	13.2076	13.1519	12.9183	12.7424	12.7288	12.8634	12.4735	13.2714	12.7953	12.9598	12.9065	12.6703	12.9208	12.9579	13.0565	12.7626
LAMP2	12.8288	12.9598	12.5918	12.5506	12.5419	12.3376	12.4996	12.5529	12.5887	12.2637	12.1144	12.9175	12.989	12.524	12.7524	12.7047	12.7936	12.64	12.4664	12.7455	12.6478	12.8544	12.4241	12.3425	12.41	12.7587	12.4537	12.5278	12.8579	13.0841	13.0363	12.9447	12.7554	12.6054	13.0136	12.6849	13.0298	12.8509	12.6703	13.067	12.5163	13.3248	12.4996	13.5345	12.8634	12.6242	12.8288	12.6686	12.9411
ZMAT3	13.0718	12.9543	12.667	12.5384	12.7635	12.6849	12.7062	13.0237	13.0117	12.7338	12.7148	12.4939	12.8902	13.2554	13.4308	13.1967	13.3147	13.1479	13.1312	13.063	13.3622	13.0821	13.1946	14.1753	13.4845	12.692	12.9561	13.061	13.5206	12.4506	12.6006	13.3901	13.2739	12.588	12.3406	12.5121	13.7006	12.4896	12.3425	13.3319	12.8109	13.4762	13.2508	12.1822	12.1052	12.3223	11.6415	12.6054	11.374
SLC16A3	12.6736	12.0334	11.874	12.501	12.9262	11.8105	11.9761	11.9653	12.1378	11.9503	12.4838	12.9065	12.4049	11.3718	11.8614	12.1461	11.9054	12.1908	11.7116	11.9976	11.8346	11.4423	11.865	11.0044	11.3204	11.3164	11.3556	11.3556	11.9161	11.873	12.0635	13.322	12.4762	12.6718	12.6524	12.5149	12.6635	12.9652	12.8171	13.2484	12.0614	12.827	12.8171	13.067	13.0095	13.2726	13.4495	13.0195	13.5766
GZMB	14.0396	13.5571	12.6849	13.3473	13.7907	12.8319	13.1293	13.2789	11.9015	13.1725	13.5652	12.9102	13.8897	13.2957	12.867	13.2833	12.2538	11.8171	12.9335	13.0363	13.5292	13.2121	12.2092	12.7953	13.0195	12.4161	12.2206	12.7872	12.6752	12.349	12.9175	12.6167	12.2183	13.7777	13.6943	13.1098	13.9617	13.7581	12.9812	12.5961	13.1178	12.7651	13.0421	14.055	13.3901	13.5737	13.4104	11.9419	14.1709
EIF3H	12.8918	13.1479	13.3546	13.2664	13.0479	13.3747	13.1786	13.1394	13.4059	13.4418	13.1501	12.8848	13.0258	13.2121	13.062	12.9771	12.989	12.9734	13.3248	13.167	13.0588	13.0841	13.1519	13.1694	13.2643	13.1501	13.1967	13.4704	13.167	13.1854	13.1371	12.8935	12.7105	13.0799	12.8319	13.3367	12.8509	12.8793	13.3801	12.5694	13.281	12.6572	12.7835	12.6417	12.6832	13.0136	12.8371	12.9335	12.7986
ARHGEF6	13.0258	12.9007	13.0317	13.064	13.0075	12.7872	12.6463	13.0907	12.7407	12.9157	12.6654	12.928	13.1501	12.6953	12.7539	12.6432	12.9026	12.6736	12.7497	12.8758	12.6953	12.9316	12.6072	12.5738	12.7602	13.1901	12.6752	12.7718	12.8544	12.9208	12.9026	12.9852	12.9634	12.9834	12.9065	12.7718	12.7803	12.9468	13.2268	13.0382	13.0195	12.9992	12.9694	12.8902	12.6752	12.8616	12.6258	13.0095	12.7225
HNRPK	13.1501	13.3723	13.0907	12.8725	12.2797	12.9007	13.0043	13.2291	13.3522	13.182	12.6605	13.3594	13.4704	13.3052	13.1178	12.9191	13.3297	12.9373	13.1271	13.2052	12.928	13.8316	12.8473	13.3572	13.1694	13.8285	13.3888	13.3248	13.1332	13.5263	13.7809	12.5219	13.1014	12.6988	13.201	13.0693	13.3273	12.9026	12.7835	12.7338	13.3982	13.4282	12.5506	12.8002	12.8544	12.7305	12.4173	12.6347	12.7032
RPL22	13.3522	13.3172	13.588	13.3546	13.0907	13.241	13.1479	13.0995	13.3572	13.6503	12.8339	13.1199	13.5234	13.3674	13.167	12.7391	13.1901	12.9083	13.1967	13.3147	12.9734	13.1946	13.0781	13.3194	13.2664	13.6266	13.1539	13.2976	13.2763	13.201	13.3674	12.7256	13.1946	13.2463	13.167	13.1079	13.1946	12.9543	13.2883	12.5022	13.7266	13.0479	12.7587	12.8204	12.7357	12.7324	12.7684	12.8319	12.6938
AES	13.0175	13.2029	13.4282	13.281	13.2909	13.3194	13.3319	13.0841	13.224	13.549	13.3319	12.7455	13.0799	13.4338	13.2029	13.093	13.2384	13.3097	13.2052	13.5119	13.253	12.9044	13.2473	13.3297	13.4308	13.1878	13.2052	13.4653	13.067	13.3097	13.2739	12.7305	13.079	13.3929	12.9652	13.0339	13.6202	12.9044	12.867	12.2908	12.914	12.7905	13.1332	12.5305	12.6364	12.5049	12.7888	12.8829	12.5476
LOC346950	13.4628	13.0298	13.5824	13.4902	13.5119	13.7232	13.771	13.7809	13.0085	13.3419	13.4445	12.5961	12.5903	12.651	13.281	12.8953	13.3395	13.1986	13.0247	13.3074	13.1714	12.9083	13.4817	12.6686	13.4628	12.8689	13.5794	13.3801	12.7225	13.3747	13.2192	13.281	13.3002	13.4418	13.067	12.222	12.9083	12.8708	13.657	11.914	13.0339	13.2689	13.3814	12.7718	12.9208	13.1138	13.0155	12.9634	13.0095
SHISA5	12.7179	12.814	12.8251	12.989	13.1529	12.7488	12.826	12.7081	13.0195	12.8883	13.061	12.7003	12.7718	12.8073	12.4062	12.8073	12.5305	12.5553	12.6167	12.7288	12.488	12.4506	12.5419	12.7256	12.4187	12.1356	12.6104	12.7407	12.6524	12.6317	12.9065	12.6038	12.9044	12.993	12.8509	12.9468	13.4572	12.7702	12.692	12.5406	12.8021	12.5043	12.7357	12.5248	13.1199	13.0117	12.8918	12.7357	12.7734
RALGDS	13.1312	13.0117	13.1332	13.1413	13.0363	13.3876	13.5709	13.281	13.3622	13.0693	13.5091	12.6118	12.8339	13.2508	13.2314	13.4544	13.0298	13.0907	13.4873	13.2554	13.1986	13.1923	13.3594	13.3594	13.1371	13.0055	13.673	13.3572	12.9694	12.914	12.495	12.9373	13.1351	13.0952	13.0117	12.8562	12.8776	13.0718	12.891	12.3439	13.1312	12.488	13.3367	12.6865	12.8491	12.6654	12.5536	13.3002	13.0439
BCAP31	12.6654	12.9102	12.8219	13.0216	13.0799	12.8404	12.9468	12.7179	12.747	12.9065	13.1832	13.0155	12.6605	12.7651	12.8829	12.8758	12.7524	12.7905	12.6493	12.8092	12.7505	12.6988	12.8528	12.5976	12.6072	12.6541	12.8562	12.7225	12.7241	12.8988	12.7324	12.6768	12.9175	13.0739	13.0298	13.0439	12.9949	12.9527	12.9242	12.8109	12.844	12.792	12.8509	12.6197	12.7081	12.8509	12.8404	12.7936	12.6364
VPS41	12.9793	12.5722	12.8596	12.6621	12.8388	12.495	12.8388	12.8868	12.9468	12.5062	12.9908	12.6588	13.1178	13.2577	12.7212	13.0095	12.8171	12.6493	13.0055	12.5903	13.3002	13.0439	13.0258	13.9879	13.4731	13.1178	13.2145	13.3747	13.4366	12.8725	12.8002	13.0155	12.8793	12.5998	12.6417	12.6597	12.56	12.3797	12.7032	12.9771	12.4748	12.6703	13.4817	12.5752	12.8055	12.271	12.5036	12.8883	11.808
MGC71993	12.565	12.7505	12.5903	12.6605	12.7872	12.7524	12.7357	12.56	12.6988	12.4968	12.8457	13.0363	12.4309	12.6813	13.0012	12.8793	12.797	13.1539	13.1247	12.7986	12.993	12.4838	12.7448	12.6118	12.8171	12.3914	12.4762	12.7338	12.7651	12.9392	12.8388	13.0216	12.6038	12.8188	12.8579	13.0995	12.792	12.9316	12.6334	12.8002	12.3753	12.8918	12.6849	12.6832	13.0298	12.8319	13.0841	12.7225	12.9734
RAB8A	12.5778	12.692	12.3769	12.8188	12.7441	12.4309	12.3639	12.3696	12.7905	12.6971	12.7803	12.9694	12.7651	12.6272	12.3982	12.7803	12.4449	12.7602	12.5839	12.5363	12.8457	12.5492	12.4735	12.2417	12.259	12.4198	12.6054	12.5363	12.6621	12.7896	12.8339	12.8491	12.5363	12.8092	12.914	12.9083	13.0237	12.8457	12.7047	13.0651	12.5233	13.0075	12.8544	13.1413	12.8988	12.9527	13.1247	12.7032	12.9908
MFNG	13.0974	13.2622	13.1901	13.2689	13.3419	13.0865	13.0075	13.0055	12.9316	13.0974	13.167	12.8596	13.0317	12.8021	12.7196	12.5248	12.8741	12.9969	12.6272	12.8579	12.8491	12.6382	13.1649	12.7835	12.827	12.9634	12.9734	12.8616	12.8868	12.7784	12.6478	12.9634	13.2121	13.236	12.827	12.9771	12.5778	13.0565	13.0032	12.7382	13.093	12.8741	13.067	12.7905	12.9262	12.8596	12.9543	12.9411	12.7765
CD37	12.4173	12.64	12.9579	12.8596	13.0117	12.5857	12.8491	12.9949	13.2833	12.9992	12.7635	13.1832	12.8883	12.9734	12.4173	12.9298	12.9615	12.6953	12.928	13.3546	12.881	12.5553	12.9175	13.0237	13.1199	12.7986	12.6556	13.1501	12.7872	13.4981	13.245	12.8918	12.4565	12.8725	12.9793	13.2029	13.6167	12.7374	12.8073	12.5419	12.8125	12.9634	12.8304	12.7986	12.7811	13.1199	12.8725	12.9044	12.6988
FAM39DP	12.8204	12.8179	13.2268	12.9242	13.0718	12.9949	12.9634	13.1519	12.6938	12.8029	13.3901	12.599	12.928	12.9861	13.0363	12.967	13.2934	12.8251	13.1832	13.0545	13.0439	13.2599	13.2508	13.5091	12.9598	12.9579	13.3273	13.2109	13.1479	13.241	13.0588	12.7718	12.4198	13.0459	12.7114	12.7062	12.0114	12.844	12.8204	12.495	12.7212	12.993	12.7888	12.6118	12.8251	12.7524	12.6556	12.8073	12.3822
PSMC5	13.2714	13.1098	13.1351	13.1351	13.3052	13.0439	13.0718	13.1014	13.0479	13.1539	13.0651	12.7539	12.5355	12.9102	12.6736	12.8425	12.9208	12.9487	12.9208	12.9561	12.8902	12.3432	13.1057	12.7272	12.9634	12.8509	12.8725	12.881	12.9226	12.394	12.4896	13.0012	13.1118	13.2268	12.9262	12.9615	12.4572	13.0155	13.1413	12.7784	13.0718	12.6287	13.0907	12.6813	12.8457	13.2169	13.1413	13.2121	13.1225
KPNB1	12.6302	12.8073	12.8233	12.7288	12.747	12.5752	12.6605	12.4664	12.3479	12.4636	12.4479	12.5134	12.7684	12.3439	12.6272	12.4339	12.7225	12.6104	12.581	12.5794	12.7062	12.7572	12.4112	12.6572	12.6736	12.9316	12.8073	12.8092	12.5568	12.6971	12.7587	13.0055	12.6588	12.747	12.6686	12.4565	12.9175	12.6524	12.8355	13.0136	12.6364	12.7635	12.8156	13.241	12.814	12.9026	13.0339	13.2214	13.0055
H3F3B	13.2566	13.8105	13.8285	13.2437	12.9242	13.3172	13.3801	14.0736	13.5402	13.8965	13.7297	13.3771	13.922	13.4059	13.5626	13.3473	13.4845	13.4059	13.5119	13.3273	13.2751	13.5571	13.1413	13.5652	13.7038	13.5319	13.7353	13.6326	13.6138	13.6051	13.698	12.6072	13.46	13.0565	13.3901	13.6051	13.3473	13.1629	13.4007	12.0989	13.4059	13.1735	13.2339	12.4996	12.6988	12.4777	12.0756	12.1019	12.0625
SUMF2	13.0907	13.067	13.1394	13.4059	13.1312	13.0401	13.0588	13.2463	13.0459	13.2859	13.3183	13.0693	13.1293	13.0599	13.062	12.9419	13.0761	13.1178	13.0247	13.3723	13.2121	12.4087	13.067	13.0693	13.1563	13.2314	13.2664	13.3699	12.9487	13.0155	13.0521	12.7986	12.9157	13.1714	12.8829	13.0258	12.7936	13.1606	13.0693	12.5149	13.1293	12.6272	12.8109	12.7617	12.8741	13.4205	12.8848	13.061	13.0521
ZNF69	12.844	12.5248	12.3505	12.4295	12.792	12.6118	12.7179	12.9694	12.7148	12.6228	12.4968	12.3109	12.782	13.2145	13.3346	12.8708	13.0718	12.9102	13.2384	12.8304	12.9834	12.9373	13.0401	14.1299	13.4257	12.9262	12.7896	12.9694	13.5402	12.4049	12.196	13.2957	13.4718	12.7563	12.9411	12.7635	13.2463	12.2483	12.2246	13.1413	12.7424	13.5292	13.3497	12.3096	12.0635	12.086	11.8318	12.4996	11.765
PRKCD	12.3198	12.5707	12.1871	12.4623	12.6718	12.4707	12.4268	12.651	12.3835	12.3237	12.5305	12.9543	12.4735	12.0579	12.3009	12.8562	12.4866	12.5056	12.5406	12.3769	12.4187	12.1669	12.4506	12.2352	12.2157	11.8266	12.2684	12.2183	12.5738	12.5887	12.3109	13.167	12.4295	12.5448	12.6197	12.7081	12.4367	12.8528	12.6463	13.3122	12.2307	12.5832	12.6605	12.8689	12.7047	12.6151	12.9157	12.7017	12.8935
FAM62B	13.1901	12.9852	13.4231	13.1158	13.1138	13.1435	13.2339	12.867	13.1808	13.3929	13.2484	13.0055	13.4308	12.8988	12.9752	12.7749	12.8491	12.9598	12.8002	12.928	12.8918	13.3827	12.9226	13.1371	13.0339	13.3248	12.8425	13.2109	13.1138	13.2052	13.3097	13.1946	12.9208	12.9242	13.1479	12.7953	13.5709	12.8741	12.9335	12.4339	13.201	13.2789	12.928	12.928	12.365	12.307	12.1449	12.9175	12.7331
VPS29	12.6258	12.8634	12.5707	12.6364	12.4777	12.5347	12.5961	12.7256	12.7803	12.7986	12.3325	13.1158	12.9035	12.4466	12.5642	12.5568	12.7659	12.651	12.7765	12.6151	12.4896	12.8355	12.519	12.4295	12.6272	12.7505	12.6272	12.6849	12.7424	12.8544	13.093	12.7794	12.8902	12.3776	12.5219	12.9427	13.0095	12.7936	12.9487	13.2632	12.7032	13.1293	12.5363	13.1606	12.4424	12.7734	12.7488	12.8371	13.2339
CCR7	13.2437	13.5737	14.3815	13.2076	13.3122	12.9044	13.3356	13.2957	13.2268	13.6537	13.2689	12.5918	13.1946	13.0401	12.8596	12.2377	13.1457	12.8562	12.7096	13.0155	12.6813	13.549	13.2029	13.6296	13.4205	13.5091	13.447	13.5373	13.6411	12.9969	13.3297	12.9044	13.1158	13.2121	12.3505	11.9992	12.5887	12.4282	13.691	12.6588	13.6381	12.1255	13.0095	12.222	12.4735	12.7617	12.7391	13.9769	11.6334
OGT	12.9992	13.0974	13.2599	13.1519	12.7187	12.5291	12.8038	13.0588	12.9191	13.0278	12.1787	12.713	13.5597	12.485	12.1645	12.4982	12.7488	12.4686	12.281	12.3954	12.5036	13.4873	12.7148	13.7139	13.2052	13.922	13.3674	13.1079	13.0781	12.8776	13.1158	12.299	12.7196	12.8579	12.9535	13.0155	12.6364	12.5461	13.0821	12.9487	13.4231	13.0974	12.7062	12.9598	12.4437	12.797	12.7524	13.063	12.4173
MBP	13.0588	12.8457	12.8404	13.0032	12.967	13.0095	12.6865	12.8355	12.4609	13.1247	13.1394	12.8233	12.8767	12.4409	12.4982	12.2391	11.9804	12.1619	12.1155	12.213	12.212	12.5794	12.0209	12.369	12.1527	12.8233	12.0906	12.5945	12.6258	12.5945	12.7455	13.0963	12.4996	12.9694	13.0781	12.8634	12.8883	12.9992	12.9468	12.9969	12.9598	12.9044	12.7803	13.1025	12.5206	12.8473	12.9044	13.281	13.253
YY1	13.0421	12.8616	12.692	12.5738	12.7212	12.6432	12.6533	12.8562	12.8125	12.8793	12.5406	12.6798	13.0175	12.4823	12.8425	12.64	12.602	12.3096	12.4522	12.7702	12.6938	12.8634	12.7225	12.2625	12.5918	13.0459	12.6493	12.9065	12.5219	12.7896	12.7635	12.9908	13.2833	12.6784	12.9852	12.797	12.9208	12.9771	12.5506	12.7684	12.9734	13.0339	12.6182	12.9119	12.7702	12.8758	13.0363	12.8021	12.814
MGEA5	13.1446	12.4996	12.867	13.0421	12.8725	12.6072	12.7855	12.9316	12.8055	12.8219	12.4522	12.5766	13.3446	12.4996	12.213	12.1518	12.7187	12.4241	12.5419	12.4748	12.3678	13.1694	12.5903	13.3248	12.8793	13.2508	13.0889	12.9354	12.9242	12.8758	12.9969	12.7212	12.3412	12.7391	12.6832	12.56	11.8364	12.64	13.0363	12.8848	13.1923	12.9298	12.9208	13.1519	12.9615	13.0521	12.6885	12.8776	12.5255
POLE3	12.9271	13.0995	13.063	13.0588	13.0889	13.2763	13.1457	13.2437	12.9208	13.0865	13.0258	13.0421	13.3194	12.8109	12.8708	12.8868	12.8425	12.8883	12.8251	13.0588	13.0693	13.0565	13.0865	13.0195	13.1178	13.5416	13.2577	13.0739	13.0175	13.1351	12.8988	12.747	12.8038	13.1148	13.1763	13.1854	12.8528	12.9335	13.0317	12.5583	12.9908	12.651	12.8689	12.9752	12.6214	12.9157	12.7986	12.7424	12.8002
PDSS2	12.9598	12.7684	12.993	12.8339	12.9527	12.881	12.9191	12.6784	13.0718	12.9007	12.8544	12.4982	12.3425	13.1057	12.8204	12.792	12.8073	12.9427	13.0339	12.7587	13.1057	12.4777	13.0278	13.3522	13.3273	12.3198	12.827	13.1832	12.9992	12.5522	12.3861	12.8171	12.3808	12.8156	12.4173	12.9102	12.142	12.3033	12.993	12.7407	12.8233	12.2377	13.1519	12.3808	13.1312	12.8109	12.8425	12.9119	12.3598
GRIPAP1	12.8251	12.747	12.4087	12.2896	12.5141	12.4479	12.6832	12.8725	13.0498	12.602	12.6686	12.3425	12.8021	13.1519	13.1832	13.0278	13.2909	12.9752	13.0693	12.8544	13.2437	13.3546	12.9354	13.9543	13.447	13.1694	12.9316	12.9762	13.5626	12.472	12.6072	13.3052	13.1501	12.5084	12.3592	12.4996	13.9581	12.2846	12.192	13.1501	12.7338	13.9363	13.2577	12.3313	12.0125	11.9533	11.6284	12.5107	11.1343
AMICA1	12.6938	12.5107	12.352	12.792	12.6703	12.2062	12.2109	12.4982	12.5839	12.4149	12.34	13.2859	13.0363	12.2227	12.2846	12.3546	12.3996	12.0968	12.4395	12.8918	12.2722	12.3665	12.3996	12.5062	12.0692	12.302	12.0918	12.0568	12.4838	12.7702	12.7913	13.0907	12.4325	12.9447	12.9427	13.0298	12.8988	12.8653	12.9734	13.0865	12.7391	13.0382	12.1539	12.9771	12.8528	12.8425	13.2763	12.4792	13.0216
CX3CR1	13.1199	12.104	10.8285	12.0303	12.495	10.3755	10.7897	11.2077	11.6183	11.4719	11.4808	12.747	12.1267	10.2993	10.5757	11.3776	10.9027	11.3686	9.98513	10.3346	10.8516	10.345	10.3144	9.62499	10.3293	10.3214	10.2694	10.4158	11.2732	10.9052	11.6226	13.2934	12.9447	12.0938	12.2259	12.3572	12.6334	13.5597	12.4678	14.1388	12.0431	13.1585	12.8457	13.6758	12.1569	13.1501	12.9852	13.4308	14.3333
PPM1G	12.9969	12.9335	12.9242	13.0545	13.0841	12.9969	12.9527	12.9354	12.8457	12.867	12.9652	12.9427	12.8125	12.7391	12.5536	12.6678	12.6054	12.6718	12.6214	12.5953	13.0382	12.7047	12.7554	12.5857	12.6849	13.2052	12.8404	12.5961	12.5091	12.7455	12.3849	12.9652	12.5278	12.9771	12.987	12.7784	12.1972	12.9065	13.1585	12.7179	12.9527	12.7256	13.0865	12.9208	12.7256	13.1332	13.0449	13.0216	13.0739
LOC374395	12.8055	12.881	12.7338	12.9543	13.0439	12.7148	12.8793	12.7407	12.5722	12.6849	12.8425	12.9561	12.4762	12.2544	12.5163	12.8251	12.5536	12.7497	12.7114	12.5062	12.5134	12.3044	12.599	12.0886	12.4409	12.217	12.581	12.5634	12.4282	12.6541	12.6784	12.9083	12.6463	12.8935	12.6493	12.928	12.7905	12.7305	12.602	12.7888	12.5121	12.5522	12.8092	13.0693	13.0117	12.8829	13.2622	12.519	13.1479
FGD2	12.6813	12.9354	12.6885	12.7749	12.7835	12.7391	12.394	12.6938	12.8288	12.4506	12.8156	12.9411	12.6849	12.2822	12.8002	12.827	12.8319	12.6197	12.4777	12.7003	13.1312	12.4295	12.6988	12.2822	12.6006	12.1019	12.2086	12.3889	12.5976	12.9734	12.8355	13.1832	12.4579	12.7196	12.9298	13.2484	12.9535	12.8073	12.6988	13.0032	12.5278	12.9652	12.897	13.2157	12.352	13.3572	13.0521	12.7953	13.1585
MAP4K2	12.7288	12.8021	12.9771	13.0075	12.6938	12.9834	13.0136	13.0821	12.9119	13.0258	13.1649	12.4735	12.8038	12.7338	13.0195	12.6541	13.1293	12.7497	12.8473	12.9834	12.5664	12.8491	13.0974	12.8528	12.747	12.8544	12.8579	12.9652	12.9354	12.7374	12.6605	12.6798	12.8953	12.9354	12.8776	12.5076	12.4112	12.747	12.6572	12.6798	12.9468	12.5752	13.1854	12.7602	12.8226	12.9771	12.6849	13.2599	12.4908
LOC339123	12.8848	12.9771	13.2029	13.1539	13.2339	13.1138	13.0521	13.1332	12.897	13.0175	13.1923	12.7148	12.7855	13.0136	13.0155	12.9468	12.9411	12.9552	12.9527	13.0521	12.8616	12.7391	12.9487	12.8988	12.8829	12.7241	12.9834	12.9191	12.7062	12.9411	12.6654	12.9505	12.9505	13.2599	13.1138	12.8355	12.2538	12.8935	12.8304	12.6088	12.9552	12.5976	13.0799	12.8634	12.7455	13.0545	12.9752	12.8616	12.8961
DCLRE1C	12.7602	12.5163	12.8055	12.4982	12.8021	12.4565	12.5976	12.6272	12.8596	12.4823	12.6953	12.6272	13.1312	13.0545	12.5291	12.8725	12.8848	12.5492	12.897	12.6736	13.0175	13.2934	12.8371	13.8248	13.4544	13.0821	13.1786	13.0841	13.3002	12.782	12.9208	12.9102	12.4968	12.5233	12.8171	12.7096	12.7338	11.9793	12.7399	13.0317	12.6135	13.0032	13.2934	12.867	12.9427	12.3822	12.4381	12.7288	11.6545
GSPT1	12.3889	12.2785	12.4409	12.3288	12.3223	12.9771	12.5931	12.5931	12.5945	12.3251	12.5634	12.5872	12.5887	12.897	12.7554	12.7305	12.9734	12.9852	13.0401	12.6556	12.9007	13.6051	12.7338	13.2508	12.8509	13.2859	13.1178	12.8188	12.7407	12.867	12.7338	12.3033	12.3553	12.2648	12.2062	12.2697	12.0948	12.259	12.4173	12.3849	12.3611	12.7212	12.6832	12.4037	14.4404	12.6447	12.9262	12.5872	12.5583
MAP3K1	12.9682	13.0799	12.6703	12.4325	12.2307	12.8634	12.5903	13.0382	12.797	12.6556	12.1052	12.5722	12.7749	12.6784	12.827	12.867	13.241	12.7684	12.4896	12.747	12.6214	13.253	12.8404	13.1878	13.1585	12.914	12.9694	12.8918	13.0498	12.7602	12.7047	12.6317	12.989	12.4367	12.4137	13.0401	12.2797	12.7749	12.6736	12.9262	13.067	13.0889	12.7305	12.5149	12.4623	12.3198	12.2391	12.4325	12.5961
KHDRBS1	13.0889	13.201	12.7617	12.7047	12.797	12.7684	12.713	12.8883	12.7374	12.9969	12.5817	12.8868	12.8689	12.6447	12.9191	12.5931	12.881	12.8829	12.7497	12.6541	12.6727	12.8793	12.5107	12.7433	12.8883	13.0339	12.56	12.8528	12.7505	12.9026	12.9734	12.6541	13.3546	12.7241	12.7505	12.6054	13.3953	13.1158	12.782	12.881	12.9852	13.5709	12.5839	12.6228	12.5536	12.6432	12.5887	12.692	12.7784
RWDD1	13.061	13.0479	13.2554	13.0974	13.1225	13.2145	13.2643	13.1312	13.0521	13.2291	12.782	12.6703	12.8379	13.4572	13.2097	13.0175	13.1735	13.2833	13.3497	13.1763	13.1351	12.9908	13.1332	13.0258	13.1832	13.2291	13.0952	13.2554	13.1901	12.7936	13.1986	12.867	12.9714	13.0588	12.8634	13.0382	13.2789	12.8725	13.201	12.47	13.1967	13.0055	12.8288	12.3044	12.6135	12.9065	13.0781	12.7196	12.6635
STX16	12.8473	12.8339	13.3028	12.8579	13.067	13.2799	13.2437	12.9752	13.1118	13.2714	12.7765	12.9714	13.1832	13.2097	12.7888	12.7032	12.9992	12.8634	13.0145	12.7602	13.2169	13.2169	13.1714	13.2859	13.1312	13.3771	13.281	13.3497	13.2076	13.2833	13.0278	12.7225	12.8125	13.0693	12.792	12.8509	12.7225	12.488	12.7374	12.5903	12.9191	12.8233	13.201	12.6597	12.6524	12.4437	12.6135	13.0401	12.1205
NDUFB11	12.9682	13.0952	13.3419	13.0761	13.3852	13.1735	13.1832	12.6635	12.6901	12.9852	13.1854	12.6849	12.7212	12.9354	12.989	12.8319	12.8092	13.0974	12.9242	13.1563	13.2339	12.7256	13.1118	12.7357	13.0155	12.9007	12.713	13.3473	12.6072	12.7587	12.6317	13.0136	12.7905	13.201	12.7441	12.8092	12.8251	12.6197	13.2339	12.6784	12.792	12.3849	13.0781	12.747	12.7179	12.8708	13.0995	12.9561	12.6054
LILRA3	11.4418	12.5219	12.1787	12.3861	13.7139	13.4282	12.9335	12.4173	12.8092	12.2747	12.524	13.3648	13.5036	12.0313	12.9298	13.7643	12.6541	13.9769	13.2689	11.9556	12.0046	12.5305	13.5206	10.3175	12.3665	11.5738	12.4982	12.8457	12.6768	12.7572	12.3159	13.7266	9.14208	12.8491	12.4565	12.349	12.4309	11.6313	12.5121	13.9617	12.4268	11.5906	13.1694	11.7272	12.0682	13.3929	12.2661	12.5305	13.5913
SNRPB2	13.1014	12.8758	12.9175	12.914	12.9298	13.3395	12.9771	12.8339	12.9579	12.7626	12.4792	12.8109	12.7539	13.1413	13.1158	12.993	12.987	13.0889	13.0761	12.9949	13.067	12.8073	13.0479	12.8251	12.9694	13.2883	13.1079	13.0651	12.9119	13.0055	13.1435	12.6988	12.8396	12.7225	12.6893	12.7667	12.9714	12.7524	12.8219	12.7962	12.814	13.1098	12.8371	12.9969	12.4325	12.7455	12.5794	12.7803	12.8579
CUTA	13.0206	12.8233	13.4544	13.1735	13.3771	13.3497	13.1714	12.9852	12.9561	13.0401	13.3297	12.967	12.9527	12.9908	13.0382	12.8233	12.8544	13.0106	12.9427	13.0339	12.8848	12.9652	13.1282	12.9694	12.8848	13.224	12.8653	13.0974	13.0459	13.0298	13.0761	12.5448	13.2339	13.1413	13.0095	12.692	12.8425	12.9427	13.0889	12.4748	13.0175	12.7803	12.9447	12.8219	13.0216	13.3346	13.1763	12.9392	12.8653
TCF25	12.827	12.8848	12.9373	12.8902	13.061	12.9812	12.7765	12.9771	12.9298	12.797	13.1079	12.8156	12.8988	12.7872	12.6478	12.5945	12.6953	12.7635	13.0117	12.4137	12.8725	12.7872	12.9579	13.0012	12.7803	12.6798	12.8758	12.7391	12.7096	12.8355	12.5983	13.1563	12.4367	13.1178	13.1079	12.6463	12.3183	12.792	13.0237	12.6135	12.9157	12.3728	13.0439	12.7734	12.2625	12.989	12.9427	13.0237	12.9694
SAE1	12.8725	13.0237	13.3827	13.0739	13.1088	12.897	13.0258	12.7455	12.7441	13.1901	13.0588	13.1394	13.2739	12.9392	12.8404	12.5206	12.7305	12.8457	12.7539	12.8528	12.8073	12.9505	12.6287	12.6832	12.8055	13.4034	12.5857	12.8868	12.792	12.8371	13.0175	12.7096	12.9527	12.897	12.9771	12.6938	12.7407	12.7441	13.2314	12.5568	13.1457	12.7424	12.8528	12.8288	12.3121	12.8902	12.7587	13.0155	12.8883
PGK1	12.5634	12.8793	12.5583	12.8038	12.2466	12.5617	12.5506	12.8848	13.1457	12.8988	12.8725	13.3827	12.9335	12.6355	12.9652	12.4924	12.5522	12.7305	12.4187	12.6038	12.2846	12.7726	12.651	11.7855	12.713	12.3742	12.8509	12.2417	12.7179	13.1178	13.0995	12.6654	12.8233	12.7602	12.9175	13.2339	12.6938	13.0841	12.7062	12.8491	12.6432	12.989	12.4651	12.8596	12.5872	12.9834	12.8092	12.7062	13.1501
CASP4	12.8339	12.8425	12.472	12.7765	12.7288	12.4609	12.6971	12.7488	12.6197	12.4651	12.692	12.6971	12.5522	12.4187	12.7488	12.8125	12.826	13.0401	12.9411	12.8793	12.7374	12.3926	12.6214	12.0948	12.6317	12.4149	12.5363	12.1669	12.5903	12.4367	12.4537	12.8528	12.8562	12.7905	12.4424	12.8457	12.7114	12.9354	12.9373	12.8793	12.5177	12.8491	12.5745	12.7305	12.7572	13.0498	13.0392	12.7602	13.1371
TMEM123	12.9752	12.9157	12.8021	12.8371	12.2828	12.5694	12.826	12.7765	13.3473	13.3674	12.044	12.7424	13.1158	12.8562	12.7936	12.6006	13.2577	12.8021	12.8689	13.1178	12.5766	13.2714	12.792	12.814	12.9992	13.1225	12.8156	12.9734	13.2577	13.0479	13.673	12.5036	13.1236	12.5391	12.5707	12.897	13.3801	13.0521	12.827	12.7455	13.4282	13.0216	12.4939	12.6541	12.6901	12.7032	12.3742	12.4924	12.271
VNN2	11.8203	12.4651	12.025	12.4255	13.1986	12.2822	12.4664	12.6718	12.7986	12.3134	12.1839	13.0382	13.4104	12.6382	12.8073	12.8544	13.0421	11.7719	12.5887	12.8339	12.3057	12.5918	12.8839	11.6991	12.7241	11.9672	12.212	11.766	13.0718	12.3835	12.1075	13.061	12.6088	12.6167	12.8388	12.3926	13.2763	12.3982	12.3914	13.5913	12.8883	11.8181	11.8333	12.8829	13.3172	12.7225	13.2957	12.2538	13.4205
HCG4	13.1371	13.0693	12.7872	12.4226	12.4424	12.488	12.6242	12.5634	12.5492	12.7148	12.7835	13.3273	12.3376	13.1199	12.7505	12.6798	12.6151	12.8509	12.7256	13.1199	13.0095	13.0055	12.6447	12.5377	13.0469	12.9373	12.9634	13.0889	12.3223	12.8596	13.418	12.4823	12.6242	12.6447	12.7017	13.3002	13.7444	12.9852	12.8562	12.3586	13.0317	12.217	13.1088	12.9083	13.0781	12.967	12.7241	12.7587	13.4034
ZNF786	12.8579	12.4924	12.7455	12.5318	12.8579	12.6752	12.9298	12.8528	12.8509	12.4552	12.7888	12.3464	12.5976	13.093	12.7374	13.0421	13.0565	12.8596	13.1435	12.7047	13.201	12.9208	13.0216	13.7643	13.4418	12.7366	13.1293	13.1371	13.3852	12.8002	12.4395	12.9175	12.5377	12.5998	12.3288	12.565	12.2294	12.1228	12.8544	13.1036	12.56	12.0568	13.4366	12.4479	12.7835	12.3159	12.5049	12.8404	11.8227
PTGES3	12.6953	12.8741	12.5121	12.8689	12.4522	12.8021	12.4002	12.7734	12.5903	12.9468	12.4594	12.9834	13.1457	12.6242	12.7047	12.6901	12.8304	12.891	12.7047	12.914	12.6072	13.0761	12.5722	12.6258	12.7488	13.3147	12.4161	12.6703	12.8055	13.1332	13.3699	12.3996	13.0545	12.41	12.6953	12.7488	13.2314	12.8839	12.5553	12.867	12.9083	13.4544	12.4023	13.0952	12.4466	12.691	12.6151	12.987	12.797
C11orf2	12.9447	12.9714	13.6381	13.3297	13.2437	13.3572	13.236	13.2643	13.0237	13.1694	13.418	12.9354	13.0693	13.2214	13.1479	12.7587	13.0195	13.1158	13.1178	13.3297	12.9262	13.1199	13.2599	13.1629	13.0588	12.9598	12.8021	13.1649	12.8961	13.1457	12.8829	12.7114	12.914	13.5431	13.1108	12.6865	12.352	12.8634	13.4205	12.0035	13.0032	12.2565	13.3002	12.7114	12.9487	13.2909	13.0175	13.0498	12.7524
DEDD2	12.7888	12.8156	12.6463	12.8288	13.0012	13.063	12.8204	12.9487	12.7225	12.6038	13.1312	12.4808	12.4623	12.9208	12.9634	12.9908	13.167	13.0739	13.2909	13.0479	13.0781	12.3198	13.1225	12.6768	12.8021	12.3753	12.8634	12.7196	12.7338	12.5036	12.565	13.1371	12.6167	12.6287	12.4792	12.5391	11.8885	12.7684	12.7017	12.8953	12.5076	12.3376	13.0117	12.4198	13.1293	13.0799	13.0258	12.8953	13.0339
PJA2	12.8156	12.8371	12.2366	12.2452	12.4339	12.8038	12.881	12.667	12.5149	12.6541	11.9525	12.1414	12.797	12.7062	12.8953	12.7539	12.8616	12.7407	12.5679	12.651	12.9065	13.0907	12.8288	12.5794	12.9834	12.667	12.797	12.9411	13.0588	12.7757	12.8708	12.6832	12.8219	12.4466	12.5163	12.5694	12.6813	12.8596	12.628	13.0439	12.8528	12.64	12.4506	12.9543	12.5694	12.4762	12.7505	12.6901	12.6841
NPTN	12.6798	12.7256	12.0724	12.5091	12.2625	12.0136	12.0239	12.3546	12.369	12.3822	12.3337	12.7784	12.8188	12.2206	12.8092	12.4748	12.2036	12.4975	11.9463	12.3211	12.3159	12.7651	12.1681	11.8781	12.0526	12.4908	11.9463	12.0906	12.5825	12.6334	12.5332	12.5206	13.0298	12.4916	13.0363	12.8725	12.9969	12.914	12.4636	13.1479	12.6988	13.1225	12.2377	13.2291	12.6953	12.5701	12.4636	12.6865	12.8171
GAK	12.5406	12.5332	12.7407	12.8634	13.1293	12.7554	12.928	12.8404	12.4678	12.6151	12.8935	12.9782	12.914	12.5419	12.667	12.5363	12.5278	12.4424	12.6317	12.5022	12.7163	12.8725	12.5391	13.0545	12.6524	12.8491	12.64	12.6088	12.5121	12.8092	12.602	12.9752	12.5887	13.0258	13.0718	12.4651	12.2661	12.6347	12.8793	12.7524	12.4149	12.867	12.9834	12.9242	12.485	12.8188	12.6347	12.8188	12.7872
EVI2B	12.4755	12.5778	12.4309	12.5121	12.104	12.4161	12.2001	12.217	12.9102	12.6364	11.8062	12.0779	12.3363	12.599	12.7241	12.6605	12.6088	12.6228	12.7888	12.8371	12.5419	12.3996	12.4552	12.0938	12.5206	12.1052	12.0187	12.8634	12.8092	12.9812	12.9157	12.8002	12.1322	12.2996	12.3275	13.241	12.4808	12.7212	12.6849	12.7667	12.8171	12.5432	12.104	13.1946	13.4817	13.0841	13.3852	12.4506	13.0459
SFRS17A	13.093	13.1036	12.9217	12.8988	12.8092	13.2076	13.1199	13.0479	13.2029	13.1786	12.8793	13.0032	13.4391	13.0075	12.7734	12.8304	13.4981	12.7256	13.0498	12.8935	13.0761	13.4007	13.2097	13.2622	13.2789	13.253	13.2097	13.201	13.1639	13.2677	13.0136	12.5634	13.0032	12.8883	13.0693	12.8319	13.1098	12.9561	12.581	12.6736	12.9652	13.1786	12.5903	12.7936	12.5752	12.3889	12.485	12.7374	12.3715
IRF8	12.7855	12.9834	12.4823	12.9157	12.5506	12.7572	12.3325	13.167	12.7488	12.7734	12.3728	13.067	13.0195	12.6197	12.4996	12.5522	12.967	12.3715	12.5291	12.8125	12.6197	12.6287	12.6425	12.8491	12.9102	12.394	12.7196	12.7765	12.7855	13.1649	12.8038	12.5419	12.4707	12.5738	12.7602	12.7936	12.7256	12.8562	12.5406	12.7765	13.2076	12.9175	12.8002	13.1694	12.4939	12.691	12.4866	12.2525	12.9226
TRMT5	12.9949	13.061	12.9634	13.093	12.782	12.9734	13.1225	13.066	13.1986	13.0479	12.8829	12.8038	12.5377	13.0095	12.9487	12.7163	12.7062	12.9615	12.9734	13.0095	12.7572	12.6118	12.9262	12.9579	12.8425	13.0439	13.0865	12.9208	12.8793	12.9694	13.1519	12.7272	12.6382	12.9335	12.6072	12.9992	12.2908	12.8425	12.9908	12.8038	12.9694	12.349	12.6038	12.2452	12.6621	12.8171	12.6901	12.5291	12.8708
DDT	12.9175	13.1014	13.1946	12.34	12.6382	12.8758	12.5377	12.5134	12.7455	13.0821	12.7441	12.1979	12.6135	12.8288	12.8733	12.897	12.9598	12.6214	12.8953	12.9812	12.8953	12.7096	12.7602	12.3452	12.7088	12.9157	12.5976	13.1118	12.8653	13.1079	12.9335	13.0565	12.9262	12.5492	12.9191	13.0907	12.6118	12.7488	12.7114	12.8371	12.4594	12.9949	13.1351	12.6798	12.3783	12.7702	13.1694	13.0339	12.9634
ATP1A1	12.8689	13.0382	13.1763	12.8616	12.8491	12.7212	12.9316	12.8073	13.1394	12.9527	12.9119	12.9496	12.7905	12.8002	12.792	12.747	12.844	12.6572	12.6736	12.8509	12.5794	12.8776	12.7572	13.2883	13.1014	12.7554	12.9752	12.9373	12.8776	12.5825	13.0032	13.0799	13.0889	13.0889	12.7225	13.0841	12.7617	12.7256	12.7765	12.7062	13.0651	12.2501	13.0841	12.2086	12.5121	12.6272	12.5766	12.8339	12.6167
SPCS1	12.9026	12.9561	12.827	12.651	12.6597	12.8509	12.7953	12.8288	12.8868	12.9373	12.8002	12.8219	12.9427	12.7288	12.7617	12.8219	12.7505	12.7017	12.6654	12.881	12.8038	12.8902	12.8953	12.4735	12.692	13.0095	12.6038	12.9119	12.8219	12.897	13.1413	12.8021	13.0651	12.7684	12.9734	13.0216	13.2577	12.9579	12.7241	12.6417	12.9949	13.0761	12.7455	12.8988	12.4161	12.5679	12.4332	12.7572	12.6736
CAT	13.0278	12.8473	12.5694	12.7803	12.9102	12.3835	12.4073	12.8457	12.6541	12.4325	12.3198	12.1179	12.3546	12.1288	12.2625	12.2902	12.5476	12.5177	11.9054	12.0948	12.4982	12.0843	12.5121	11.7272	12.244	11.8924	12.335	12.4008	12.5945	12.1461	12.0799	12.9411	12.987	12.7324	12.3742	12.5312	12.0136	13.2702	12.5925	12.8457	12.897	12.9102	12.519	12.5679	13.1098	12.9812	13.0479	13.0521	13.3473
SEPX1	12.0682	12.5291	11.9006	12.3083	12.7096	12.025	12.3183	11.9914	11.9852	11.9074	12.3121	12.8288	12.111	11.423	11.6209	11.9346	11.6536	12.0102	11.8394	11.8355	12.0079	11.1148	11.9407	11.0031	11.6629	11.3838	11.5844	11.4841	12.0999	12.1228	12.0938	13.0317	12.365	12.5918	12.3611	12.6621	12.6901	12.7114	12.7888	13.3901	12.0483	12.3996	12.3996	13.0258	12.9026	12.4212	13.46	12.5347	12.792
PRDX1	12.7986	12.4492	12.5391	12.495	12.5036	12.4623	12.5049	12.352	12.5461	12.4866	12.41	13.2029	12.2525	12.0239	12.8339	12.4255	12.131	12.5794	12.1485	12.2013	12.2565	12.2747	12.5945	11.8828	12.1575	12.5802	12.1693	11.8551	12.4309	12.3742	12.8251	13.0545	12.7539	12.6151	12.9208	12.7602	12.9119	12.8902	12.8596	13.2121	12.6524	12.9468	12.8708	13.0155	12.4149	12.8528	12.814	12.8725	13.3594
GZMA	13.5206	13.253	12.2146	13.1808	13.4308	12.8653	13.1413	12.9734	12.6686	13.3546	13.0065	12.9598	13.0865	13.253	12.9026	13.1694	12.0789	12.7617	12.8109	13.0651	13.0565	12.6151	12.3376	12.5049	12.3425	13.588	13.1014	12.814	12.3753	12.519	12.619	12.602	12.6432	13.4231	13.5319	12.6736	13.253	13.4071	12.9652	12.7264	13.1585	12.8793	13.3273	13.2643	12.6432	13.1563	12.3425	13.0175	13.6296
LOC440093	13.1332	13.2714	13.2076	12.4062	12.3728	13.1923	12.9714	12.9834	13.3248	13.2689	13.2291	12.8758	12.7241	13.2314	12.9771	13.1786	12.9852	12.9335	13.1501	13.0498	13.2883	13.1786	12.9083	13.0799	13.1606	12.9468	12.8596	13.46	12.9834	13.1036	13.2664	12.881	12.6832	12.6228	12.7978	13.1986	12.7081	13.1225	13.0907	12.4762	12.9316	12.0354	13.0339	12.7338	12.9908	12.8002	12.914	12.6736	12.8156
IGF2R	13.0401	12.8304	12.7539	12.8092	13.0693	12.4792	12.6953	12.6556	12.41	12.7602	12.9771	12.3861	12.7374	12.4748	12.6197	12.4939	11.9281	12.0767	12.1316	12.121	12.3572	12.1507	12.4908	12.111	12.2183	12.0146	12.5219	12.4367	12.2773	11.8789	11.8009	12.8868	12.6686	13.2909	12.8092	12.9044	12.6447	13.061	12.5448	12.8251	12.6946	12.335	12.5887	12.8371	13.4445	12.4664	13.2739	12.4522	13.2689
RAXL1	12.8953	12.4449	12.7088	12.3748	12.7488	12.5134	12.8109	12.8046	12.9373	12.394	12.7936	12.5672	12.5872	12.6988	12.5134	13.0841	13.0095	12.7986	12.8171	12.7114	12.9543	12.8868	12.8251	13.691	13.3953	12.7602	13.1435	13.2643	13.2463	12.7986	12.2001	13.3028	12.5121	12.1098	12.3176	12.5583	12.2098	11.9706	12.5752	13.0974	12.3961	12.4137	13.1457	12.292	12.7374	12.394	12.4609	12.5391	11.5685
EIF2S3	12.9392	12.844	13.1271	13.2484	12.9335	13.0479	13.1158	12.8579	13.3122	13.3648	12.7572	12.8425	13.2291	13.1435	13.0439	13.3699	13.1629	13.1786	13.1293	13.3827	12.9119	13.418	13.241	12.9919	13.201	12.8388	12.9852	13.4082	12.8251	12.9065	13.4762	12.7635	12.6885	12.5961	12.4968	12.8473	12.5865	12.6382	13.0781	12.5347	13.1649	12.8371	12.6302	12.1299	12.56	12.501	12.5857	12.5219	12.4522
BRMS1	12.599	12.8288	12.9714	12.9908	13.0952	13.1479	12.8304	12.9026	12.7272	12.6628	13.1606	13.2726	13.0974	13.0195	12.7863	12.7617	12.7455	12.891	12.8304	12.8233	12.9191	12.6798	13.1282	12.9852	12.7212	12.9949	13.1413	12.8776	12.5506	12.9447	13.0952	12.8073	12.6317	13.1394	12.928	12.8491	12.4996	12.6006	13.0498	12.5461	13.0012	12.6054	12.7524	13.0117	12.9335	13.1694	13.0317	12.8288	12.8233
CAB39	12.8425	12.6151	12.3325	12.7835	12.7718	12.3452	12.2271	12.5583	12.4651	12.8689	12.0125	12.6072	12.6813	12.2013	12.0703	12.0865	12.2874	12.2259	12.3009	12.349	12.0012	12.4161	12.3299	12.3797	12.3783	12.6347	12.4651	12.3144	12.6038	12.4808	12.2958	12.7505	12.7272	12.7872	12.6287	12.5522	12.6258	12.7602	12.792	13.0739	13.0421	13.0821	12.3425	12.9812	12.519	12.7407	12.7905	12.7407	12.9487
IFI30	12.0601	12.4023	12.4325	12.2984	12.4939	12.2648	12.565	12.1414	12.993	12.3639	12.6635	12.9335	12.0968	12.7905	12.3835	13.0799	12.7357	12.9065	12.7684	12.3914	12.5903	11.9074	12.8868	11.9271	12.2417	11.2805	12.4686	12.1403	12.3376	12.8171	13.063	12.6736	11.6298	12.2525	12.4187	13.2384	12.5163	12.5722	12.4982	12.9119	11.9474	12.0537	12.8793	12.8733	13.063	13.2052	12.987	12.0313	13.2599
WARS	12.7032	12.8491	12.1495	12.4161	12.4049	12.2614	11.8867	12.2931	12.3861	12.0767	12.6541	13.093	12.1299	12.2525	12.0943	13.3572	12.8725	13.4789	12.5536	12.0473	12.6654	12.0177	12.2734	12.135	12.3299	11.4635	12.7241	11.9677	12.0146	11.6833	12.3769	12.8758	12.1966	12.1598	12.2565	12.9652	13.2859	12.667	12.2884	13.2192	11.8181	12.6971	13.2097	13.5824	12.5766	13.2268	12.5163	12.4777	13.2268
BRPF1	13.1606	13.2214	13.0278	12.8171	12.8204	13.3446	13.1435	13.1479	13.0761	12.8528	12.9044	12.8571	12.9908	13.167	13.3801	13.2463	13.1394	13.3194	13.1563	13.1079	13.1735	13.2859	13.1763	13.0075	13.1501	13.1098	13.3172	13.0479	13.0865	13.2508	12.9852	12.7039	12.928	12.8021	12.9752	13.0117	12.9793	12.8355	12.4823	12.6334	12.8935	13.1435	12.713	12.6334	12.6463	12.2931	12.4309	12.6752	12.5976
PPA1	13.0651	13.0821	12.9065	12.6832	13.1014	12.8188	12.56	12.897	12.8491	13.3248	12.5976	13.2976	12.7424	12.9191	12.8918	12.6718	12.6214	12.987	12.6463	13.0175	12.3083	12.6752	12.7256	12.6901	12.8689	13.1271	12.5003	13.0136	12.9771	13.167	13.1563	12.3412	13.3261	13.0095	12.2747	13.2214	13.1986	13.1797	13.2291	12.6151	13.5709	12.6832	12.6686	12.6768	12.2996	13.0278	12.5568	12.8562	12.5076
C4orf34	13.0206	12.4968	12.5568	12.5461	12.7905	12.4226	12.7936	12.7096	12.9615	12.5406	12.602	12.1449	12.3875	12.8528	12.472	12.7433	12.9714	12.6258	12.6334	12.5107	12.8219	12.2785	12.9771	13.2689	13.1539	12.3263	12.8689	12.8708	13.0974	12.4149	12.1816	13.1247	12.6072	12.519	12.3835	12.6228	11.9566	12.3376	12.5219	12.8616	12.5291	12.5961	13.2291	12.5036	12.8848	12.9226	12.581	12.7524	12.2183
SPSB3	12.7872	12.8002	13.1199	13.0363	13.1946	13.2508	13.0382	13.066	12.9044	12.9026	13.093	12.7863	12.8457	12.7196	12.5707	12.6447	12.8339	12.7455	13.093	12.9724	12.8355	12.5738	13.0155	13.0651	12.9908	12.8858	13.0421	13.063	12.7905	12.9373	12.7017	12.5918	12.3721	13.0781	12.9812	12.6541	12.1598	12.7651	12.8491	12.394	12.8953	12.3875	12.9226	12.7524	12.6118	12.7391	12.8038	13.1413	12.64
MYO1G	12.4409	12.7617	12.5432	12.692	12.6678	13.1519	12.7272	12.9468	12.6971	12.56	12.9505	12.7936	12.6524	12.7047	12.5448	12.8634	12.5347	12.7114	12.7391	12.6447	12.814	12.64	13.0012	12.7872	12.4466	12.3439	12.6635	12.8109	12.7391	12.6885	12.7913	12.8883	12.8021	12.9561	12.9899	13.0278	13.3446	12.8038	12.5163	12.6832	12.1693	13.0907	13.1479	12.3835	12.0625	12.7196	12.5752	12.9208	12.8491
LOC387820	12.4636	13.0195	12.5492	12.5857	12.2282	13.1312	13.0216	12.8829	12.8927	12.5432	12.3169	12.7062	12.7803	13.3572	13.3572	13.3319	13.1786	13.0237	13.1878	13.1247	13.3747	13.8713	13.2384	13.4128	13.1247	13.3446	13.5373	13.1271	13.0952	13.2169	13.0799	12.4367	12.7003	12.4037	12.8988	12.9316	12.8725	12.6865	12.5036	12.5305	12.4678	12.8634	12.7505	13.093	12.9316	12.4118	12.3849	12.5903	12.3484
MFSD1	12.483	12.7765	11.9619	12.2835	12.0958	12.037	11.743	12.4623	12.3611	12.2625	12.1223	12.565	12.4823	12.0224	12.5679	12.472	12.4381	12.2835	12.3412	12.1366	12.2404	12.3572	12.1631	11.6956	12.0854	12.2062	12.0625	11.8857	12.519	12.2602	12.1473	12.519	13.0012	12.5121	12.8355	12.8596	12.7784	13.0799	12.0494	13.3648	12.6541	13.3147	11.9201	12.8528	12.5062	12.4485	12.7148	12.625	12.7305
SEC61A1	12.8021	12.7872	12.747	12.9226	13.1629	12.9262	12.7702	12.792	12.5448	12.7187	12.9102	12.8571	12.7953	12.8741	12.8388	12.7179	12.5778	12.797	12.797	12.7554	12.8473	12.6447	12.7114	12.8883	12.6988	12.6711	12.814	12.5766	12.4808	12.9083	12.3715	12.6214	12.7047	13.0761	12.9579	12.6242	12.222	12.7905	12.9561	12.7986	13.1247	12.4395	12.7488	12.4594	12.6317	12.8288	12.8251	12.7148	12.6272
HBXIP	12.6572	12.8528	12.4678	12.3639	12.349	12.3875	12.41	12.4409	12.6556	12.6768	12.5363	12.7905	12.8296	12.5794	12.5036	12.6463	12.7338	12.6463	12.5707	12.8038	12.5679	12.6718	12.5263	12.6228	12.6621	12.8653	12.599	12.6182	12.692	12.967	12.8171	12.5553	12.9226	12.4395	12.7905	12.8288	13.1714	12.9226	12.6382	13.0351	12.7667	13.2384	12.5347	12.7148	12.5839	12.8219	12.6493	12.5931	12.9373
C19orf22	12.0483	12.2859	12.4939	12.6752	12.4409	12.5553	12.4908	12.4008	12.6167	12.495	12.6768	12.3452	12.2317	12.3996	12.5476	12.7233	12.8288	12.7047	12.5506	12.6865	12.1485	12.5536	12.5794	12.5255	12.5377	12.4062	12.4325	12.8544	12.4339	12.6463	12.6104	12.2931	12.2109	12.5794	12.0239	12.352	12.7391	12.1426	12.6167	12.4395	12.3183	12.1763	12.276	12.5022	14.4549	12.1024	12.6635	12.3288	12.0703
SH3BGRL	12.6971	12.7936	12.119	12.4609	11.9129	12.0187	12.1255	12.6317	12.7749	12.5461	12.1858	12.8083	12.9242	12.5377	12.8355	12.8918	12.5903	12.6242	12.3337	12.7391	12.2391	13.0117	12.1539	12.2602	12.519	12.5839	12.3376	12.4395	12.8109	12.8793	12.8784	12.3546	12.9354	12.3559	13.0237	13.1199	13.0718	12.9392	12.3982	13.1539	12.8596	13.7139	12.1467	13.3002	12.651	12.5903	12.8793	12.6588	12.7554
STOM	12.7096	12.625	11.9924	12.9714	12.6752	12.6447	13.0565	12.5752	12.2404	12.4073	12.5664	12.2672	11.6899	12.4339	12.8883	12.6849	12.1883	12.8319	12.4112	12.2109	12.1792	11.9366	11.9836	11.89	12.0635	12.0548	12.5839	12.1414	12.2538	11.8818	12.0865	12.0854	12.6118	12.7635	12.8528	12.4714	11.9815	12.827	12.3144	12.6953	12.651	12.3169	12.4062	12.5976	13.6326	12.7602	12.5248	12.827	12.6572
HLA-DQA1	11.2878	12.2672	12.3109	13.771	12.213	13.4128	11.9566	13.2976	11.7008	13.5516	12.9852	13.9733	12.0568	13.7266	13.2689	12.1299	13.3346	12.0057	13.9581	13.7942	11.4852	13.7232	11.9869	12.2931	13.657	13.691	13.6138	12.9762	12.2996	12.276	13.5402	13.5345	13.738	13.568	12.8918	13.0521	12.3808	12.4087	12.4309	12.4449	12.7305	12.6588	12.3783	13.0831	12.7539	13.2463	13.5737	13.6326	13.4308
ITM2A	13.2957	13.3929	13.2192	13.0521	12.7003	13.493	12.8219	13.2739	13.2314	14.0159	13.0155	13.3419	13.2052	13.4308	13.1519	13.4519	12.9543	13.8496	12.8092	13.2577	12.3969	13.6021	13.253	12.9615	12.9734	13.7232	13.0841	13.2664	13.0117	13.2463	13.8174	12.7734	12.9949	13.061	12.6006	12.6752	13.3723	12.302	13.3395	12.1121	13.3699	12.3815	13.5766	12.4792	12.797	12.6072	12.8339	13.1901	12.6588
RPN1	12.6493	12.667	12.8092	12.7587	12.7803	12.8579	12.8708	12.7651	13.0799	12.897	12.7017	13.061	13.1606	12.8883	12.6768	12.6197	12.5766	12.7179	12.9191	12.9392	12.8055	12.881	12.7407	13.0781	12.7062	12.7196	12.7896	12.967	12.9427	12.7953	12.7651	12.7338	12.7407	12.844	13.1293	13.1435	12.667	12.6703	12.9992	12.7241	12.8708	12.7017	12.7338	12.8848	12.7488	12.6686	12.6182	12.6151	12.8758
CLK1	13.2934	13.2763	13.2314	13.0117	12.8473	13.2577	13.6326	13.6235	13.549	13.4153	12.5679	12.9083	13.3052	13.568	13.3419	13.4082	13.5146	13.2689	13.281	13.4731	13.2689	13.7609	13.2739	14.1343	13.738	13.4902	13.8423	13.4954	13.6081	13.3446	13.3419	12.4792	13.2437	13.0545	12.9354	13.1501	12.7163	12.967	12.4226	12.5107	13.3097	13.0421	12.8741	12.4748	12.7749	12.3753	12.2835	12.4866	12.0938
PHF11	12.7196	12.7718	12.6272	12.6953	12.4996	12.7441	12.5857	12.6054	12.713	12.7305	12.352	12.6784	12.5961	12.5887	12.6463	12.7407	12.9044	12.6364	12.6768	12.565	12.5363	12.6556	12.4367	12.7288	12.6938	12.9487	12.6197	12.6588	12.7441	12.5347	12.9191	12.5406	12.5318	12.4762	12.472	12.6784	13.093	12.4226	12.8092	12.6605	12.6865	12.6088	12.8038	12.8733	12.271	12.7272	12.7047	12.8848	12.7114
PPM1F	12.8038	12.9752	12.8457	12.7272	12.8371	12.967	12.5107	12.7617	12.501	12.6447	12.8038	12.5448	12.8793	12.4073	12.8616	12.488	12.5056	12.4609	12.488	12.2908	12.7399	12.2551	12.6962	12.6054	12.4282	11.9981	12.5278	12.4037	12.6373	12.7505	12.2489	12.9771	12.6946	12.9157	13.1271	12.9561	12.2773	12.867	12.7305	12.8562	12.6151	12.2944	13.0401	12.7488	13.5851	12.9852	13.2909	12.3835	13.1563
LMO2	12.3183	12.6718	11.9959	12.4537	12.1932	12.2578	11.8058	12.5918	12.4982	12.1058	12.2391	12.7272	12.0526	11.8581	11.8876	12.6135	12.4187	12.5738	12.3625	12.3665	12.3198	11.5571	12.4466	11.6741	12.3033	11.4503	12.2036	12.3835	12.5318	12.6524	12.5233	13.2677	12.7062	12.0968	12.3144	12.9447	12.5679	12.8251	12.7572	13.2909	12.222	12.8288	12.6432	12.7803	12.1244	12.6621	12.9119	12.6832	13.2622
CAPNS1	12.1064	12.4838	12.7855	12.5938	12.3996	12.7505	12.6118	12.3861	12.4784	12.3439	12.993	12.7017	12.5291	12.792	12.6382	12.9354	12.7047	12.8988	12.8425	12.7179	12.64	12.2501	12.6784	12.4381	12.3237	12.3889	12.3546	12.7324	12.5887	13.0459	12.8156	12.6432	12.3337	12.7488	12.9226	12.9505	12.989	12.6228	12.5925	12.6317	12.2984	12.6798	12.7212	12.7047	12.6654	12.8092	12.9102	12.7855	12.9505
CCDC130	12.8404	12.9119	12.792	13.2268	13.0421	12.993	12.8457	13.1178	12.7324	12.6135	12.9345	12.4282	12.844	12.5825	12.7407	12.7905	12.8509	12.6347	12.5918	12.6347	12.7835	13.0521	12.9908	13.1923	13.1413	12.7953	12.9335	12.989	12.7749	12.692	12.7179	12.5679	12.3376	12.9527	12.7196	12.3703	12.3452	12.6364	12.7225	12.6197	12.7539	12.5918	12.7936	12.6382	12.2602	12.6334	12.7003	12.9852	12.5887
STAU1	12.5961	12.6971	12.5318	12.6072	12.5872	12.7032	12.5091	12.4808	12.6463	12.6054	12.6478	12.8055	12.9505	12.7635	12.8288	12.6768	12.7324	12.6865	12.8233	12.7835	12.6832	13.1649	12.5857	12.7539	12.7684	12.9771	12.6432	12.7179	12.8616	12.9157	12.7684	12.4339	12.5752	12.5318	12.6662	12.713	12.8741	12.6432	12.5291	12.7047	12.6768	12.897	12.4728	12.6572	12.6493	12.4735	12.5839	12.6541	12.4226
COMMD3	12.7953	12.7081	12.5738	12.9335	12.6621	12.7374	12.4226	12.6242	12.4466	12.6417	12.2691	12.7651	12.6038	12.0979	12.0209	12.1283	12.2391	12.1575	12.2036	12.3009	12.2352	12.103	12.3083	12.0958	12.5461	12.6302	12.1244	12.4777	12.4735	12.5961	12.4636	12.6849	12.4354	12.5839	12.5522	12.6417	12.3822	12.7407	12.8404	13.093	12.8055	12.7539	12.6727	12.8616	12.1787	13.0216	13.1563	12.9427	13.1138
SHFM1	12.7225	12.4558	12.6524	12.7256	12.8038	12.2328	12.1179	11.8679	12.2785	12.3875	12.495	12.6214	12.4212	12.281	12.1438	12.485	12.3639	12.472	12.3325	12.3096	12.3728	12.2098	12.111	11.9556	12.2206	12.6432	11.7747	12.1277	12.4226	12.4792	12.5298	12.7587	12.302	12.3753	12.5918	12.4816	12.8002	12.651	13.1923	12.8425	12.7357	12.7554	12.8776	12.713	12.5391	13.1271	12.8616	13.149	13.0761
HSPB1	12.5553	11.9729	13.2763	12.7872	13.241	12.8741	12.8741	12.7003	12.8758	12.9908	13.253	12.4449	12.6214	12.7702	12.797	12.9044	12.6118	12.9191	12.5278	12.692	12.5738	12.5091	13.1079	12.6703	12.6901	12.4762	12.5347	12.7953	12.6174	12.1943	12.4707	12.6347	13.0821	13.0907	12.4466	12.104	12.5931	12.2013	13.0095	12.2477	12.7734	12.1332	13.1832	12.1551	13.1786	12.7212	12.7872	13.4789	12.2896
NDUFAB1	12.6151	12.5766	12.6541	12.5707	12.8055	12.6391	12.6703	12.4339	12.121	12.5003	12.485	12.6938	12.3815	12.3288	12.5406	12.6417	12.4137	12.6556	12.4707	12.5263	12.7617	12.369	12.3678	12.1366	12.3121	12.7256	12.2246	12.3822	12.3728	12.5752	12.5448	12.7953	12.9543	12.5664	12.7047	12.6686	12.8021	12.7505	12.7455	12.7305	12.41	13.0439	12.5945	12.989	12.3797	13.0439	12.9734	12.914	13.1158
CD151	12.495	12.7635	11.7855	12.6317	11.6572	12.9102	12.7441	12.4049	12.3849	12.5492	12.8404	12.7718	11.5387	12.8616	12.844	12.9793	11.9641	12.0229	12.4309	12.6953	12.5149	11.6785	13.0718	11.4495	12.3982	11.5694	12.8251	12.2578	12.3559	12.5134	12.2352	12.5722	12.4241	12.5248	13.0421	13.2145	12.6463	12.797	12.0067	12.8689	12.3546	12.8776	11.8355	11.8571	11.7121	12.9652	12.3753	12.9262	13.0401
ATP6V1E1	12.4623	12.1669	12.2501	12.4792	12.5568	12.4492	12.3121	12.131	12.2501	12.2602	12.2265	12.5561	12.4381	12.2672	12.244	12.4762	12.4049	12.4325	12.5432	12.524	12.3954	12.3797	11.9619	12.3625	12.2944	12.2908	12.111	12.2785	12.3769	12.3534	12.3057	12.8319	12.0239	12.4693	12.5022	12.1144	12.5448	12.5903	12.6654	12.7357	12.3996	12.2625	12.5583	12.8156	12.7617	12.9242	12.8491	12.9354	13.0237
CENPB	12.5945	12.7702	12.8883	12.7986	12.9615	12.8596	12.9908	12.8188	12.6885	12.8868	12.9175	12.8528	12.64	12.7835	12.9908	12.844	12.5583	12.993	12.7872	12.6736	12.9157	12.2013	12.9949	12.5506	12.5233	12.4522	12.5752	12.8304	12.8002	13.063	12.7441	12.8708	12.6635	12.914	12.8029	12.7407	12.1184	12.8689	12.565	12.5248	12.6784	12.6995	12.9411	12.5499	12.6258	12.897	12.9373	12.5664	13.0718
PEA15	12.881	12.6038	12.6295	12.7024	12.692	13.0032	12.8125	12.9543	12.914	12.5022	12.5391	13.1098	12.8404	12.6654	12.7905	12.914	12.9447	12.713	12.5461	12.9969	12.9044	12.7357	12.7524	12.4924	12.4808	12.1914	12.5076	12.7096	12.8304	13.1563	12.6703	13.0651	12.7986	12.9065	12.8425	12.914	12.5248	12.8304	12.7718	12.8092	12.602	12.7784	12.5872	12.7225	12.4479	12.8776	12.7256	12.6135	13.1332
HCFC1	12.6118	12.8055	12.7114	12.7554	12.7187	12.6272	12.692	12.747	12.7096	12.8171	12.8109	12.8457	12.7441	12.5976	12.5766	12.5857	12.8055	12.5419	12.6228	12.6971	12.5248	12.8371	12.6118	12.8868	12.6953	13.1585	12.6832	12.6364	12.5583	12.7835	12.6865	12.8219	12.9065	12.7803	12.9561	12.7148	12.2602	12.8125	12.5672	12.5432	12.7784	12.797	12.7572	12.6971	12.3996	12.4268	12.4124	12.6572	12.6228
LY96	12.3728	12.5377	12.1288	12.4636	12.5391	12.292	12.3769	11.8954	12.6953	11.873	12.2773	13.1854	12.6572	12.4579	12.4124	13.2577	12.4282	12.7272	11.767	12.3134	12.3605	12.8883	12.6865	12.0767	12.1414	12.34	12.1438	11.9091	12.5233	12.6768	12.827	12.8902	12.1858	12.2822	12.4367	12.7734	12.9535	12.5707	12.814	12.6235	12.4302	13.3052	12.9734	13.2192	13.1271	12.8653	12.6605	12.3263	12.6214
ZNF428	12.3363	12.792	13.1118	12.797	12.9026	12.9852	13.1808	13.0421	12.8304	13.1014	13.2169	12.6302	12.5998	13.0317	12.8758	12.7455	12.826	13.1199	13.1225	13.0565	12.8868	12.8233	13.2052	12.7803	12.8304	12.9505	12.6214	13.1247	12.9852	12.8425	12.9598	13.2169	12.9598	13.0237	12.9834	12.5722	12.5664	12.8491	12.7081	12.1261	12.6063	12.602	13.1312	12.3387	12.5522	12.6382	12.7407	13.2314	12.7179
PIK3IP1	12.8562	13.4873	14.196	13.1098	12.7936	13.72	13.7777	13.5009	13.1247	13.6351	13.1574	12.6768	13.1394	13.8423	13.3929	13.0055	13.5458	13.4653	13.6635	13.7139	13.1413	14.3235	13.821	13.7777	13.6326	13.7809	13.7676	13.8861	13.6785	13.5077	13.7549	12.6417	13.236	13.2833	12.8055	12.827	13.1178	12.5576	13.3473	12.2372	13.5036	11.8627	12.9262	11.8818	12.3808	12.5206	12.3198	12.9969	11.7575
ADAM15	12.213	12.6228	12.8544	12.6971	12.6054	13.0136	12.9044	12.7357	12.6524	12.5248	12.6463	12.9496	12.284	12.4149	12.2538	12.5872	12.5291	12.4651	12.2074	12.1086	12.7872	12.1954	12.6588	12.2489	12.4908	11.8991	12.9411	12.64	12.3996	12.6228	12.0329	13.236	12.7684	12.9743	13.0565	13.0498	11.7729	12.9242	12.4707	12.6929	12.4823	13.0363	12.8125	12.7407	12.8226	12.4996	12.9969	12.5177	12.7587
FDFT1	12.5476	12.2625	12.9992	12.488	12.4479	13.0498	12.7424	13.0739	12.5391	12.9561	13.0298	13.1519	12.7872	12.365	12.453	12.6104	12.8829	12.9908	12.8339	12.2971	12.8653	12.6865	12.6621	12.6938	12.8708	12.4651	12.8902	12.472	12.9714	13.0382	12.5945	12.7888	12.8204	12.7148	12.7539	12.4636	12.1972	12.8758	13.1457	12.4939	12.85	12.0079	12.9615	12.519	12.7032	13.0298	12.6382	12.928	12.7936
HCP5	12.9634	11.6288	11.9024	12.8073	12.9226	11.9054	11.4	11.8417	11.7855	11.0379	11.9981	12.2631	12.5206	11.5108	11.5075	11.4223	11.7926	11.6116	11.3891	11.6875	11.5514	11.0737	11.5134	11.997	11.5659	11.6982	12.2194	11.4877	11.3981	11.4869	11.51	12.9793	12.2697	12.6686	12.2884	11.5685	11.8934	12.881	12.3534	13.0952	12.5036	11.873	12.3639	13.5402	12.6718	13.4762	13.2883	13.72	13.568
NINJ1	12.2233	12.9527	13.0216	12.3586	12.6478	13.3297	13.0317	13.0363	12.8002	12.6478	12.8758	12.8388	12.897	13.2859	13.4789	13.46	13.1014	13.1808	13.4445	12.5377	13.6167	12.9527	13.7074	12.4866	12.7913	12.4609	13.067	12.7114	12.8596	12.9561	12.7617	12.8109	12.4449	12.9812	12.9598	13.1394	12.3425	12.7888	12.3783	12.5291	12.2785	12.4424	13.0258	12.667	13.8825	12.5091	12.8457	12.0906	12.8092
[truncated: 24,154 more rows]
[truncated: 64 more columns]
